# Supplementary material for: Development of a Biotechnology Platform for the Fast-Growing Cyanobacterium Synechococcus sp. PCC 11901
Source: MDPI journal article supplement (doi:10.3390/biom12070872), 2022-06-23
Supplement: s1 [file s1]

## Supplementary information

Figures S1 – S13.

Tables S1 – S6.

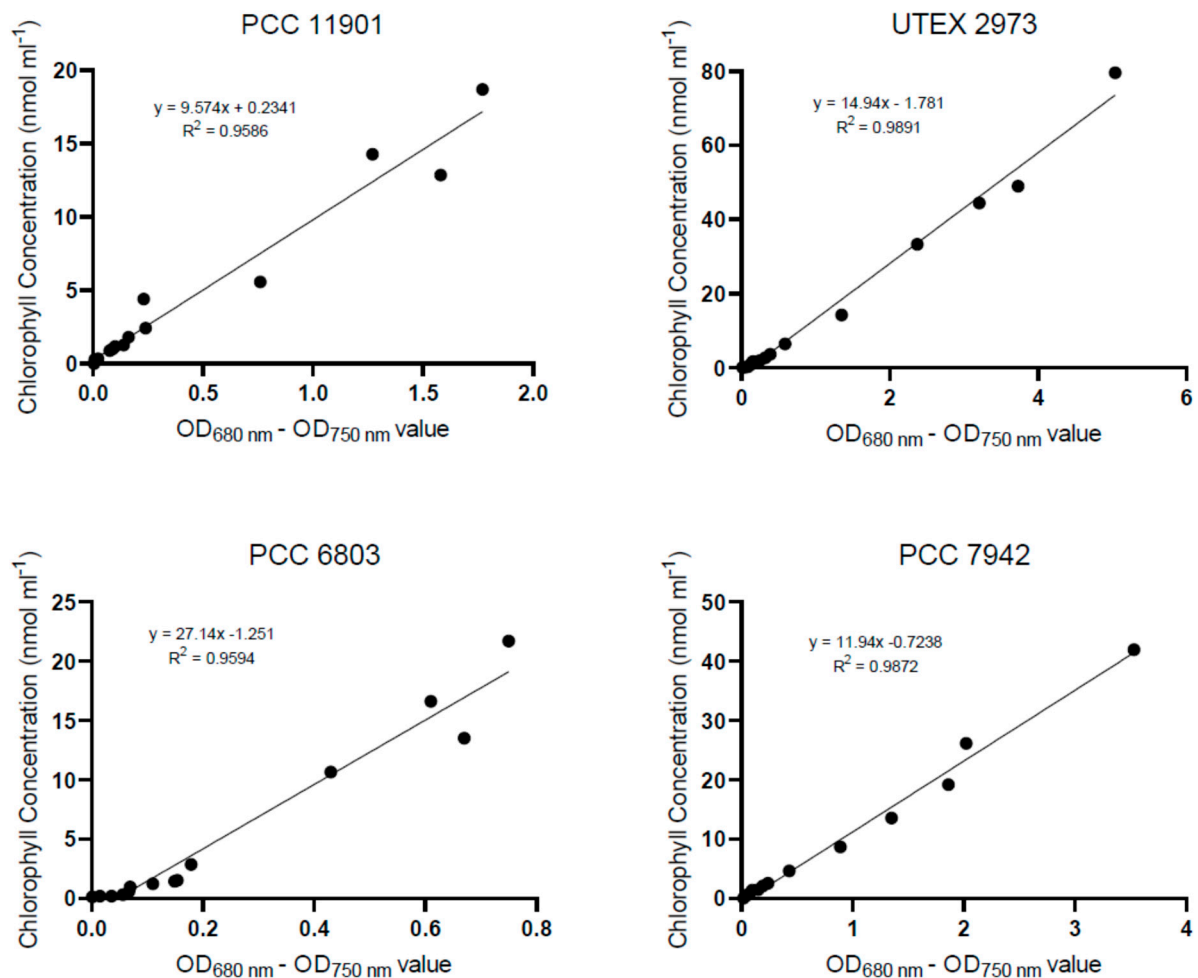

**Figure S1: Correlation between the Abs(680nm)-Abs(750nm) value and amounts of chlorophyll measured following methanol extraction.** Samples were measured at absorbance of 750nm and 680nm, followed by extraction with methanol to measure chlorophyll concentration. Amount of chlorophyll was correlated with absorbance ( $A_{680}-A_{750}$ ). The regression line is shown. The slope of the regression line ( $R^2$ ) was then calculated.

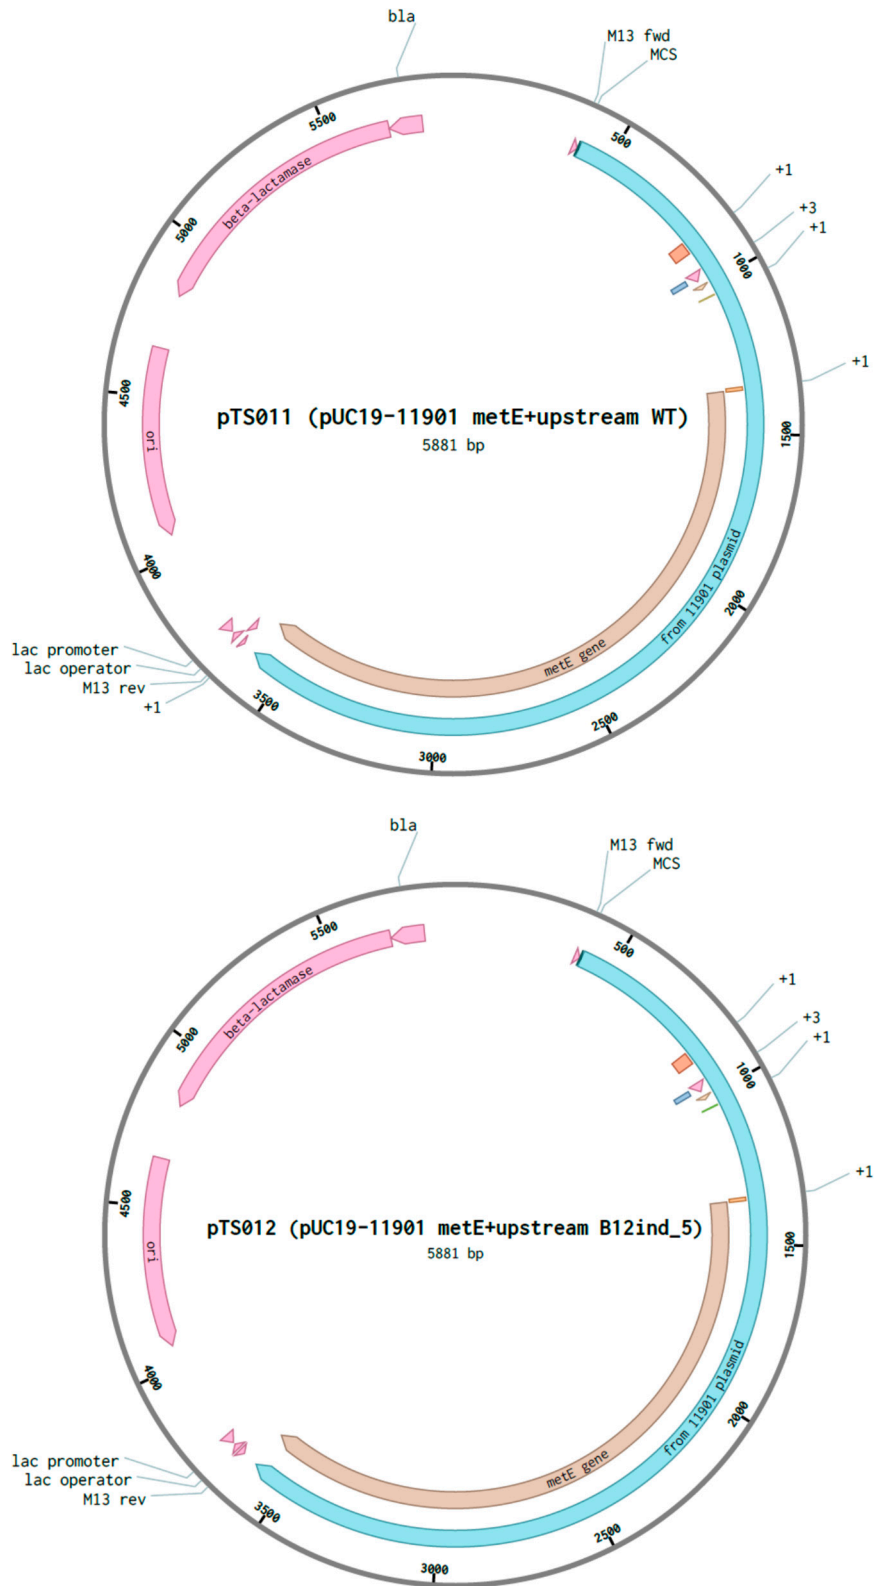

**Figure S2: Plasmids pTS011 and pTS012.** Plasmid pTS011 (*top*) was used to sequence the region 1000 bp upstream and 500 bp downstream of the WT *metE* gene start codon, for comparison with both the published sequence and that of the B12ind\_5 strain (cloned in pTS012, *bottom*). Annotated GenBank files can be found in

pTS012: <https://benchling.com/s/seq-hnUCluMPolpxaGYDBPQs?m=slm-e9O29Gmlg5hovbBXnhF>

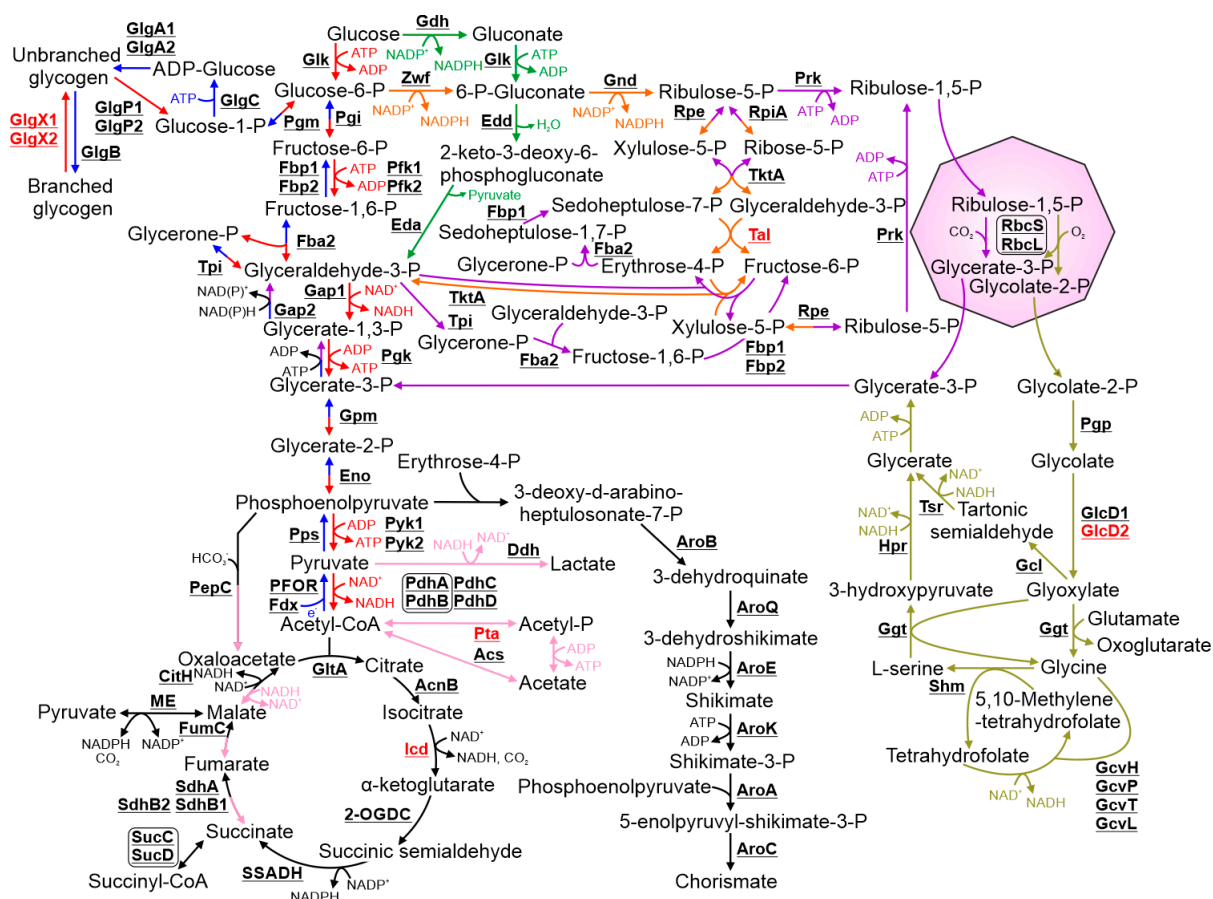

**Figure S3: Schematic detailing the pathways involved in PCC 11901 central metabolism.** Biosynthetic steps involved in glycolysis and gluconeogenesis are highlighted in red and blue respectively. Steps in the Entner-Doudoroff pathway are highlighted in green. Steps involved in the oxidative pentose phosphate pathway and the Calvin-Benson-Bassham cycle are highlighted in orange and purple, respectively. Fermentation pathways are highlighted in pink. Photorespiration pathways are highlighted in olive. Where enzymes catalyse reactions in two pathways, the arrows are split between their respective colours. The carboxysome is represented as a purple octagon. Cofactors in each reaction are shown with the exception of protons, water, oxygen and inorganic phosphate. Proteins with low sequence similarity to PCC 6803 enzymes are highlighted in red.

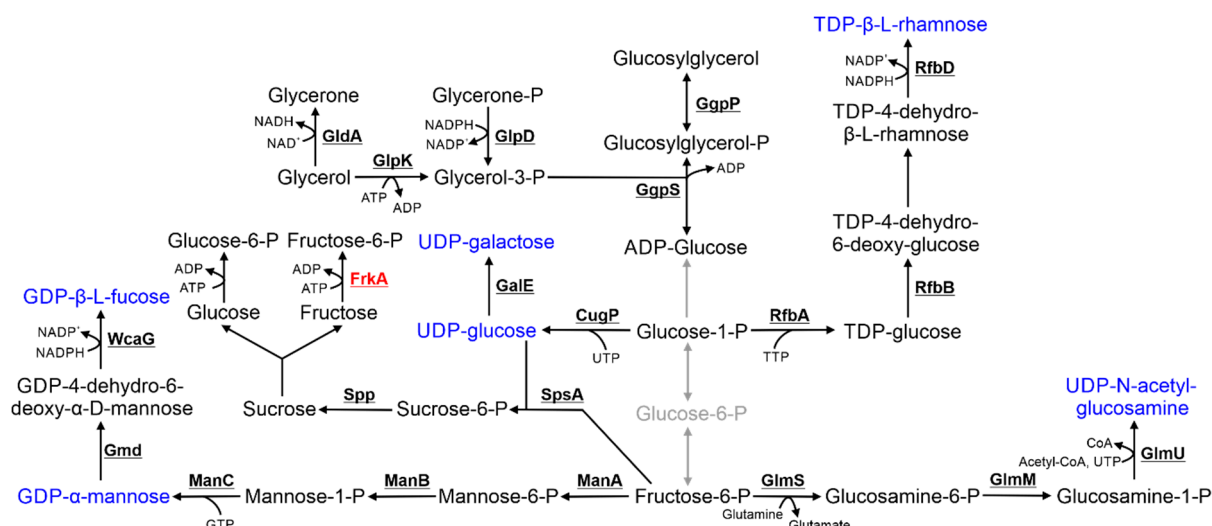



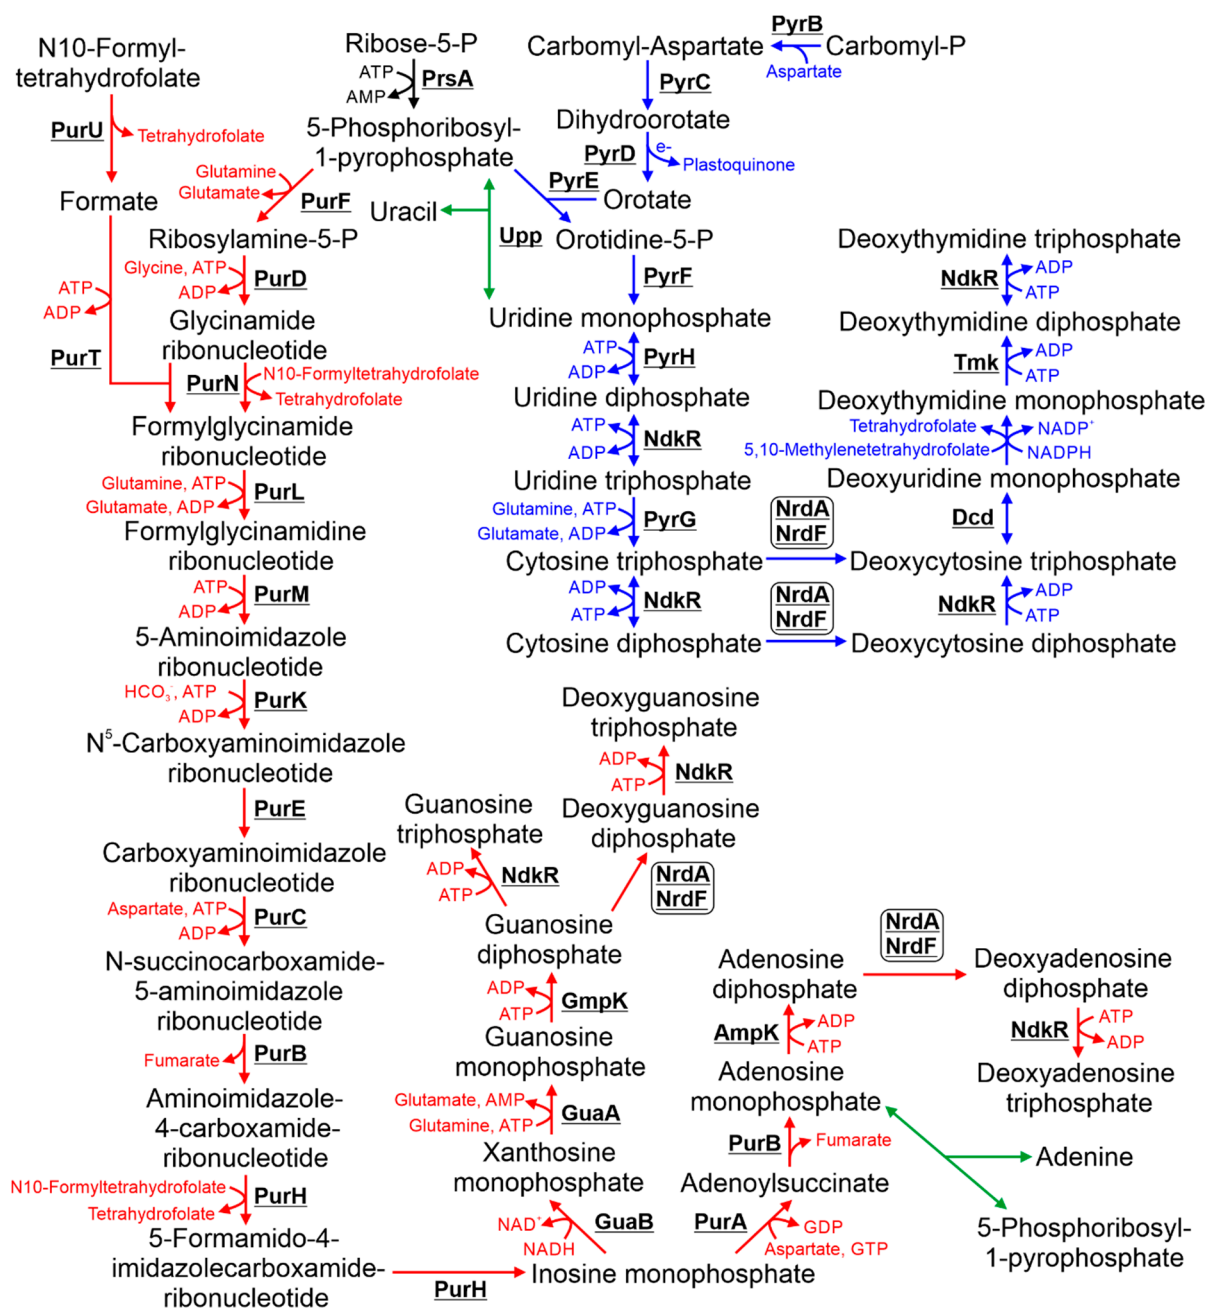

**Figure S6: Metabolism of nucleotides in PCC 11901.** The purine and pyrimidine biosynthesis pathways are highlighted in red and blue respectively. Possible nucleotide salvage pathways are highlighted in green. Cofactors in each reaction are shown with the exception of protons, water, oxygen and inorganic phosphate.



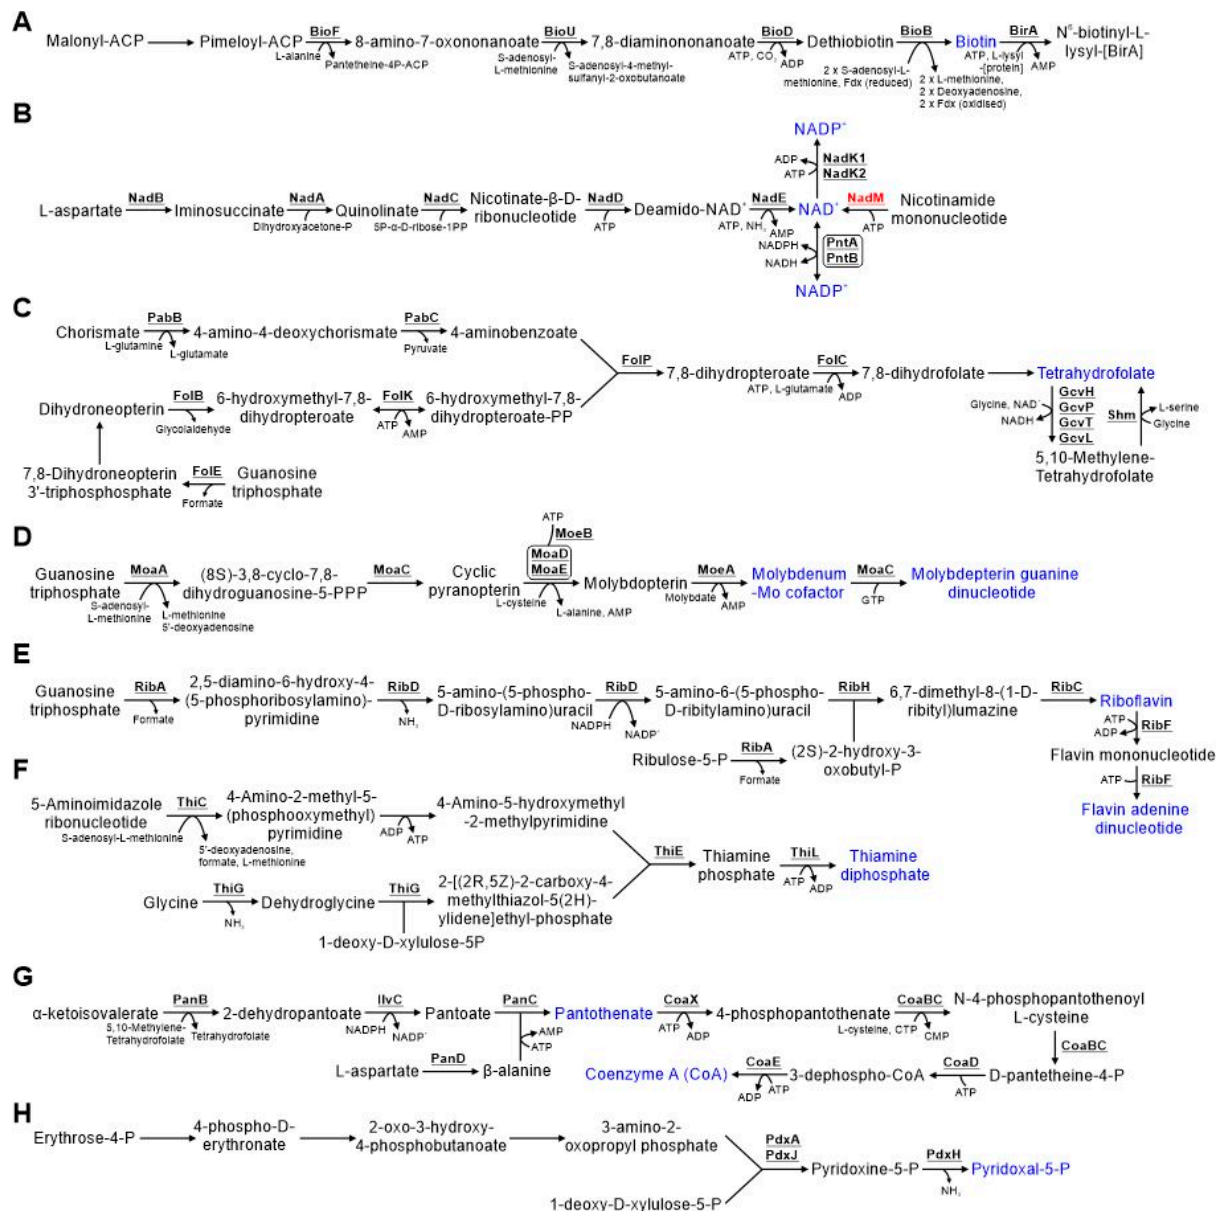

**Figure S7: Metabolism of vitamins and cofactors in PCC 11901.** Detailed are the pathways for biosynthesis of A) Biotin, B) NAD<sup>+</sup> and NADP<sup>+</sup>, C) folate, D) molybdenum cofactors, E) riboflavin and FAD, F) thiamine, G) pantothenate and coenzyme A, H) pyridoxal-5P. Vitamins and cofactors are highlighted in blue. Cofactors in each reaction are shown with the exception of protons, water, oxygen and inorganic phosphate. Proteins with low sequence similarity to PCC 6803 enzymes are highlighted in red.

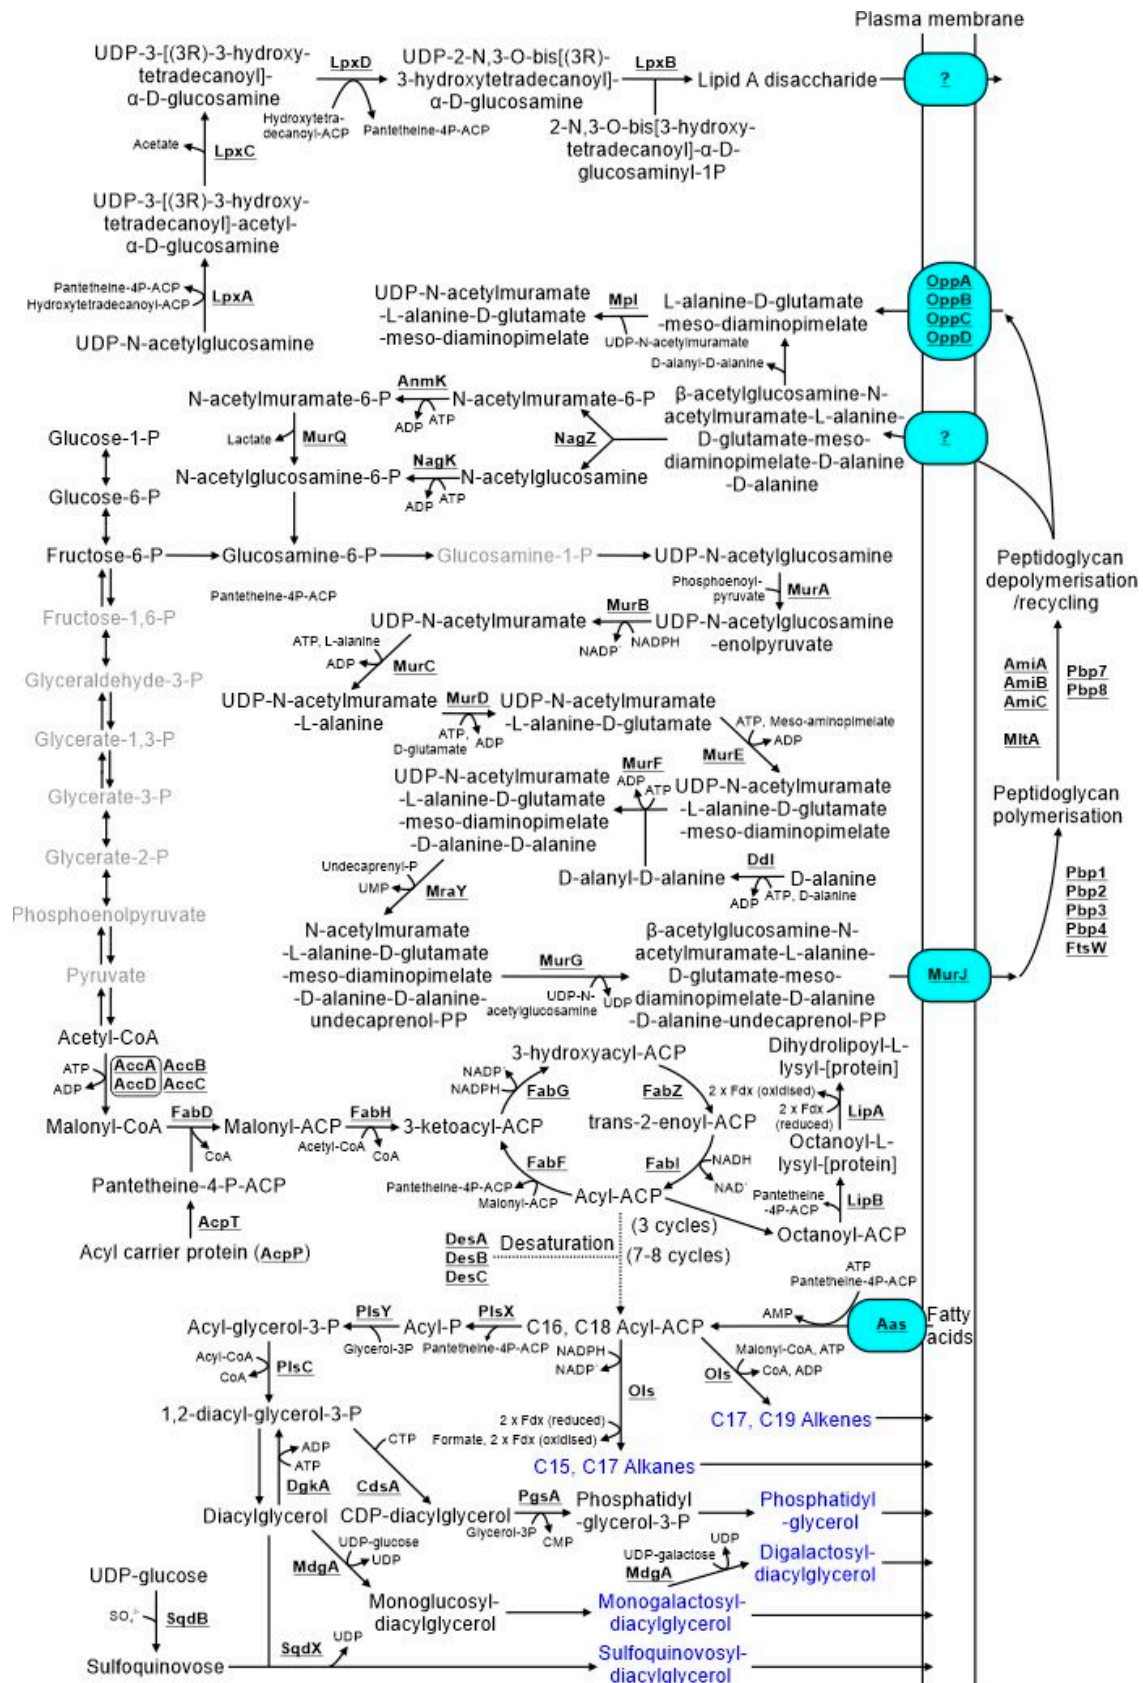

**Figure S8: Metabolism of membrane lipids, peptidoglycan and lipopolysaccharides in PCC 11901.** Membrane lipids are highlighted in blue. Steps highlighted in grey are compounds



**Figure S9: Metabolism of isoprenoids, quinols and carotenoids in PCC 11901.** Carotenoids are highlighted in blue. Cofactors in each reaction are shown with the exception of protons, water, oxygen and inorganic phosphate.

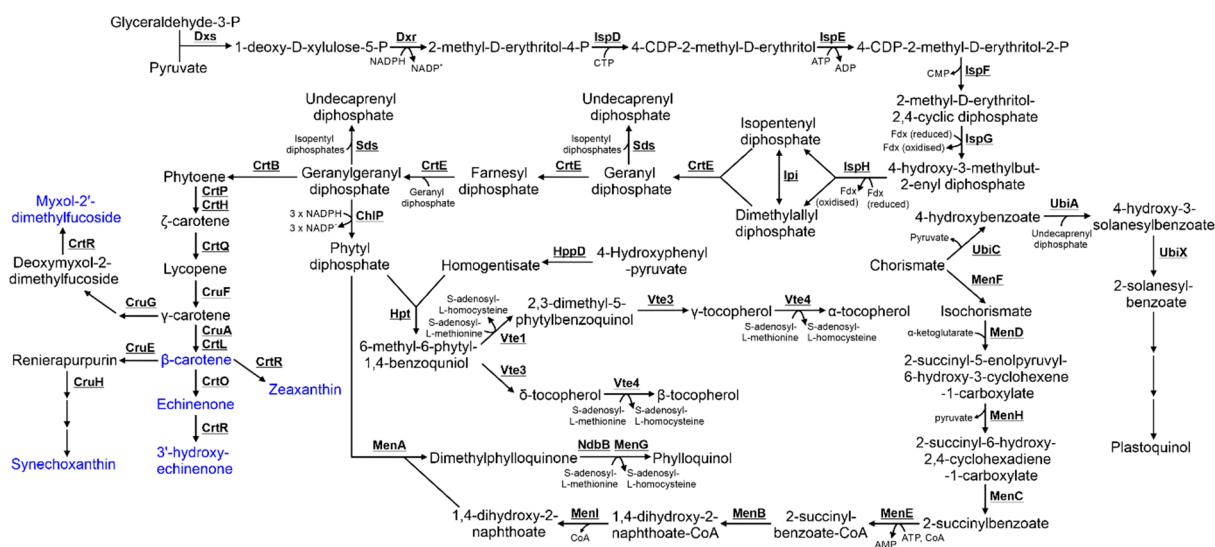

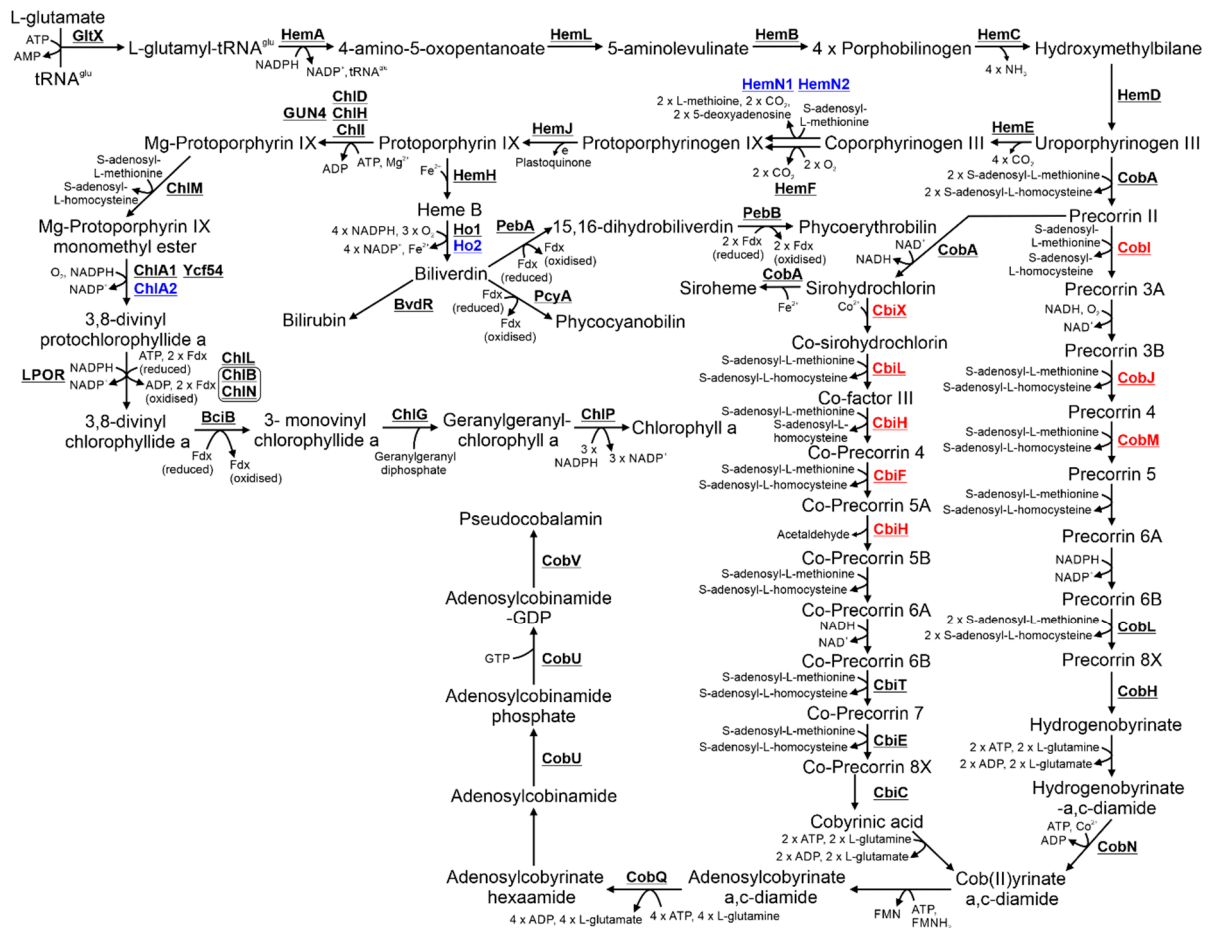

**Figure S10: Metabolism of chlorophyll, phycobilin and pseudocobalamin in PCC 11901.** Proteins involved in anaerobic or low oxygen environment enzymatic steps are highlighted in blue. Cofactors in each reaction are shown with the exception of protons, water and inorganic phosphate. Proteins with low sequence similarity to PCC 6803 enzymes are highlighted in red.

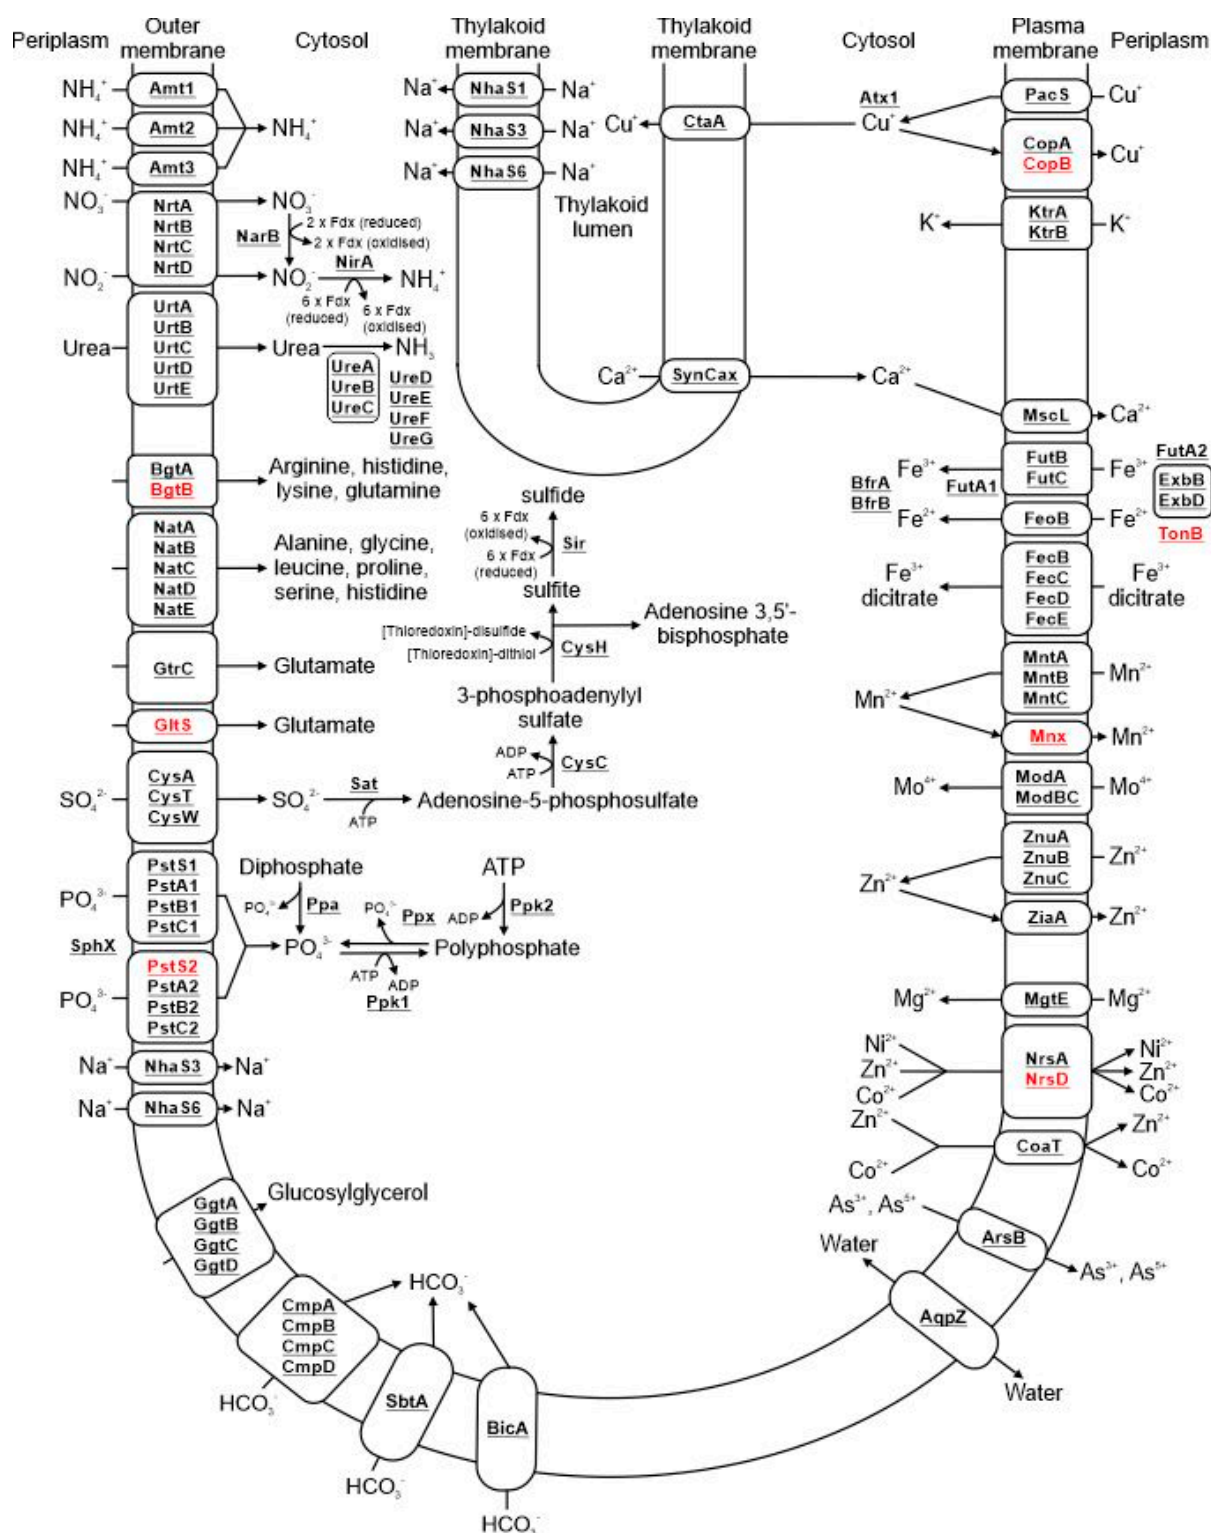

**Figure S11: Proteins involved in metabolite transport and conversion of nitrogen, sulphur and phosphate based compounds in PCC 11901.** Localisation of transporters in either the plasma or thylakoid membrane is detailed. Subunits in each complex may not all be membrane localised but soluble. Cofactors in each reaction are shown with the exception of protons, water, oxygen and inorganic phosphate. Proteins with low sequence similarity to PCC 6803 enzymes and transporter subunits are highlighted in red.

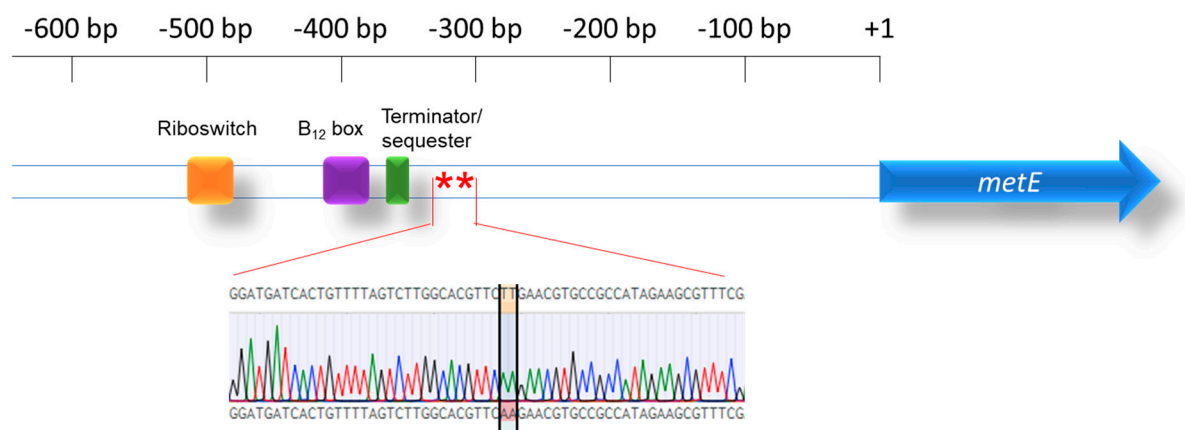

**Figure S12: Sequencing of the *metE* upstream region of the PCC 11901 B12ind\_5 strain.** Riboswitch components, including B<sub>12</sub> binding motif (“B<sub>12</sub> box”) and terminator/sequester, annotated as described by RibEx server. Insert shows sequencing chromatogram for the TT=>AA double mutation present in the B<sub>12</sub>ind\_5 strain and its alignment to the WT sequence.

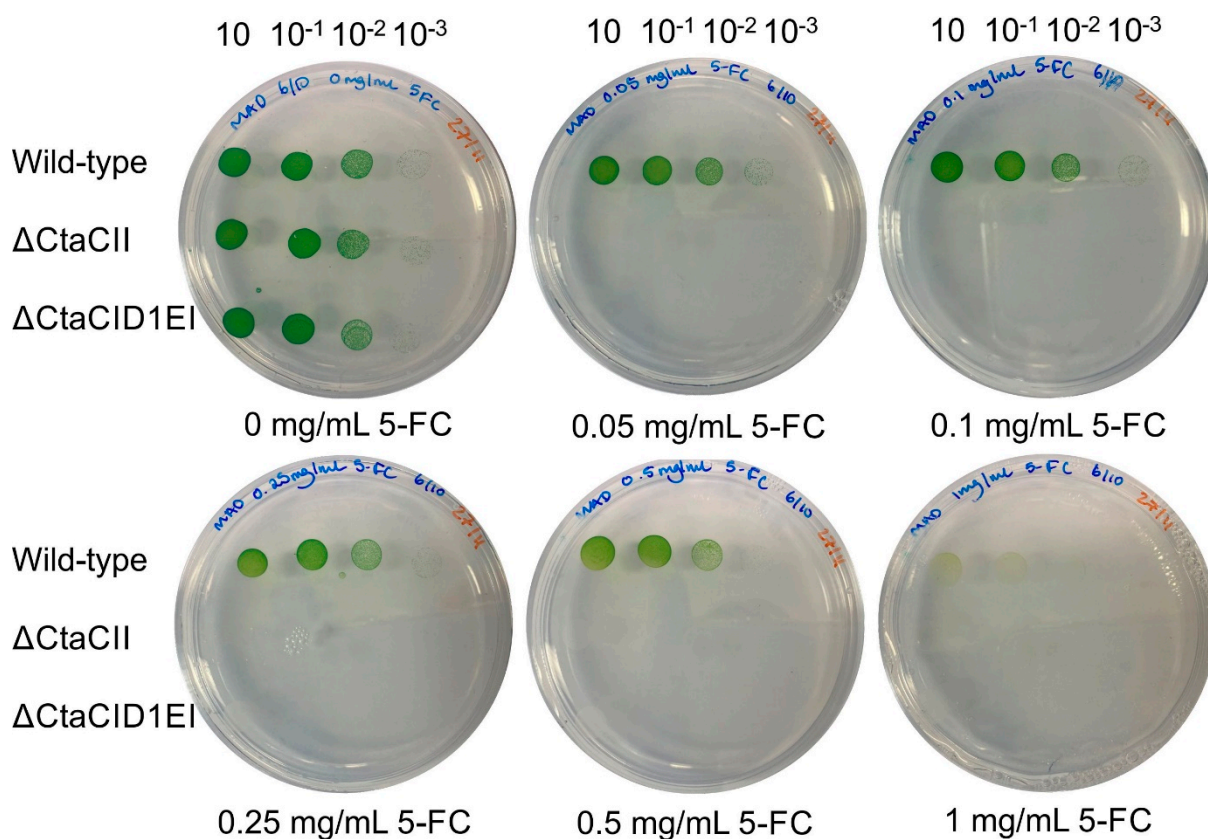

**Figure S13: Growth of wild-type 11901 and the *ctaC1D1E1* and *ctaCII* marked mutants on plates with increasing concentrations of 5-FC.** Dilutions are shown above each plate.

**Table S1: Primers used in this study.**

| Primer                | Sequence                                                          | Purpose                                                                                                         |
|-----------------------|-------------------------------------------------------------------|-----------------------------------------------------------------------------------------------------------------|
| ICA_pUC19_11901metE_F | CACGACTTGGCAAGCTGCTTTTATTATCATGGTCATAGCTGTTTCCTG                  | Linearization of pUC19 backbone                                                                                 |
| ICA_pUC19_11901metE_R | TTGGATTTTGTATTTTGTATCCCTAATTCAGTGGCCGTCGTTTTAC                    | Linearization of pUC19 backbone                                                                                 |
| ICA_11901metE_pUC19_F | GTTGTAAAACGACGGCCAGTGAATTAGGGATCAAAAAATCAAAAATCCAATCAAG           | Amplification of the 500 bp upstream and first 500 bp region of PCC 11901 metE for assembly to linearized pUC19 |
| ICA_11901metE_pUC19R  | CACAGGAAACAGCTATGACCATGATAATAAAAGCAGCTTGCCAAGTC                   | Amplification of the 500 bp upstream and first 500 bp region of PCC 11901 metE for assembly to linearized pUC19 |
| metE_seq_1            | AAAACCACTCAGGCATCACTG                                             | Primer for Sanger sequencing                                                                                    |
| metE_seq_2            | TCCTAGGCCAGCTCAAAGC                                               | Primer for Sanger sequencing                                                                                    |
| metE_seq_3            | TGCACGGGAATTTGAGCG                                                | Primer for Sanger sequencing                                                                                    |
| ARTO_LF               | ATCGAGGTCTCAGGAGCGGAAACCAACCAGAGAAATT                             | Generation of left flank                                                                                        |
| ARTO_LR               | AGCTCGGTCTCTTCATGTAATCGCTCACAAACCATGACCT                          | Generation of left flank                                                                                        |
| ARTO_RF               | TGCACGGTCTCAATAACATTGGTCACTAAAGCCTCTTG                            | Generation of right flank                                                                                       |
| ARTO_RR               | GCTCAGGTCTCTAGCGTGTATGTCCACGGCACTTTG                              | Generation of right flank                                                                                       |
| COX_LF                | ATCGAGGTCTCAGGAGCCTTTAGTGTTGACGTGAA                               | Generation of left flank                                                                                        |
| COX_LR                | AGCTCGGTCTCTTCATTGCAAGTTCTGTGCGGACA                               | Generation of left flank                                                                                        |
| COX_RF                | TGCACGGTCTCAATAAGATGAACCGCCGATTGCC                                | Generation of right flank                                                                                       |
| COX_RR                | GCTCAGGTCTCTAGCGATCAGTGCCGTAATCCCGAA                              | Generation of right flank                                                                                       |
| desB_LF p1F           | GTACGAAGACCTGGAGCTGACAGGTAACTGCCGG                                | Generation and domestication of left flank                                                                      |
| desB_LF p1R           | GTACGAAGACTCTACTCGTTGAAACCTTTCAAAT                                | Generation and domestication of left flank                                                                      |
| desB_LR p2F           | GTACGAAGACCGAGTAGACTGCCGCCC                                       | Generation and domestication of left flank                                                                      |
| desB_LR p2R           | GTACGAAGACTCCATTAACAGTAGTCTGGGATGGCTGC                            | Generation and domestication of left flank                                                                      |
| desB_RF               | GTACGAAGACCTGCTTGAGCCATGCTCCGATTGG                                | Generation of right flank                                                                                       |
| desB_RR               | GTACGAAGACCTAGCGTTTTGGTAGGCGGTGGCG                                | Generation of right flank                                                                                       |
| COXfor                | AGGCAATGTTCCCTAGAGA                                               | Confirmation of gene segregation                                                                                |
| COXrev                | ACCCCGTCAGCACATAGAAA                                              | Confirmation of gene segregation                                                                                |
| ARTOfor               | CGAAGAGTAACATCACCGCC                                              | Confirmation of gene segregation                                                                                |
| ARTOrev               | ATACGATGATTTGGCACGGC                                              | Confirmation of gene segregation                                                                                |
| desBfor               | TGGGTTCACTGGTAGTGGAC                                              | Confirmation of gene segregation                                                                                |
| desBrev               | CCCAAGATCCCGTTAAACC                                               | Confirmation of gene segregation                                                                                |
| Km_LF_QC              | CAAGACGTTTCCCGTTGAAT                                              | Verification of pUC19:ARTO-CodA-KanR and pUC19:COX-CodA-KanR                                                    |
| pUC19_LR_QC           | GGTGATGACGGTGAAAACCT                                              |                                                                                                                 |
| pUC19_RF_QC           | GAGTCAGTGAGCGAGGAAGC                                              |                                                                                                                 |
| Cassette_RR_QC        | TTAGGCAGAAGACTGGGC                                                |                                                                                                                 |
| FOR barcode           | gtGGTCTCtAtGaGAAGAGCACGGTAGCCTTNNNNNNNNNNNNNNNTGCCAGTCTTCTGCCTAAG | Amplification of codA/kan cassette                                                                              |
| REV insert            | GTAGACATGAGCCGAAGGTC                                              | Amplification of codA/kan cassette                                                                              |



**Table S2: Plasmids used in this study.**

| Plasmid                   | Plasmid design                                                                                                                                     | Purpose                                                                                                                               |
|---------------------------|----------------------------------------------------------------------------------------------------------------------------------------------------|---------------------------------------------------------------------------------------------------------------------------------------|
| pUC19: desB-CodA-Sp       | pUC19 + 5' flanking region of desB gene (1000 bp) + codA/SpR cassette (3488 bp) + 3' region of desB gene (1000 bp)                                 | Marking plasmid: introducing codA-SpR into desB NS                                                                                    |
| pUC19: Unmark Linker      | pUC19 + 59bp sequence                                                                                                                              | Serves as a blank/linker sequence to be inserted between the 5' flanking region and 3' flanking region of the desB gene for unmarking |
| pUC19: desB-Unmark Linker | pUC19 + 5' flanking region of desB gene (1000 bp) + Unmark Linker (59 bp) + 3' region of desB gene (1000 bp)                                       | Unmarking plasmid: introducing a short 60bp linker into the marked desB::codA-SpR                                                     |
| pTS011                    | pUC19 + 500 bp up-/downstream of WT <i>metE</i> start codon                                                                                        | Sequencing of WT PCC 11901 <i>metE</i> upstream region                                                                                |
| pTS012                    | pUC19 + 500 bp up-/downstream of B12ind_5 <i>metE</i> start codon                                                                                  | Sequencing of B12ind_5 PCC 11901 <i>metE</i> upstream region; introducing B12ind_5 B12-independent phenotype to PCC 11901 WT          |
| pUC19: ARTO-CodA-KanR     | pUC19 + 5' flanking region of ARTO gene (531 bp)+ codA/kanR cassette (2949 bp; amplified from vector pICH47732 ) + 3' region of ARTO gene (526 bp) | Generating marked mutant of ARTO in PCC 11901                                                                                         |
| pUC19: COX-CodA-KanR      | pUC19 + 5' flanking region of COX gene (745 bp)+ codA/kanR cassette (2949 bp; amplified from vector pICH47732 ) + 3' region of ARTO gene (658 bp)  | Generating marked mutant of COX in PCC 11901                                                                                          |
| pUC19: ARTO-Unmark Linker | pUC19 + 5' flanking region of ARTO gene (531 bp)+ + Unmark Linker (59 bp) + 3' region of ARTO gene (526 bp)                                        | Generating unmarked mutant of ARTO in PCC 11901                                                                                       |
| pUC19: COX-Unmark Linker  | pUC19 + 5' flanking region of COX gene (745 bp)+ + Unmark Linker (59 bp) + 3' region of ARTO gene (658 bp)                                         | Generating unmarked mutant of COX in PCC 11901                                                                                        |

**Table S3: Potential PCC 11910 homologues of PCC 6803 proteins involved in central metabolism.** Proteins were identified in Mills *et al.* [1]. The Uniprot ID relates to the identification system used on the Uniprot database [2]. The Uniprot ID amino acid sequence stored within this database was then used during the BLASTp function. All Gene Products, Gene Name, Other Gene Names, Localisation, Molecular Weight (kDa) and No of TMH's are derived from Baers *et al.* (2019) [3]. Each blast hit shows the NCBI Accession, in addition to the Percentage Identity Score, the length of the alignment number of mismatches as well as the number of gaps within the alignment. The species start and end refers to the start and end of the alignment within each species. The E-value refers to the number of expected hits of a similar quality that could be found by chance, the lower the E-value, the less likely the match is down to chance. For this analysis, we have only included proteins with an E-value of 1 or less. The bit-score is a log2-scaled and normalised raw-score.

**Table S4: Potential PCC 11910 homologues of PCC 6803 proteins involved in processes other than central metabolism, light harvesting and photosynthesis, and proteins of unknown function.** Proteins were identified in Mills *et al.* [1]. The Uniprot ID relates to the identification system used on the Uniprot database [2]. The Uniprot ID amino acid sequence stored within this database was then used during the BLASTp function. All Gene Products, Gene Name, Other Gene Names, Localisation, Molecular Weight (kDa) and No of TMH's are derived from Baers *et al.* (2019) [3]. Each blast hit shows the NCBI Accession, in addition to the Percentage Identity Score, the length of the alignment number of mismatches as well as the number of gaps within the alignment. The species start and end refers to the start and end of the alignment within each species. The E-value refers to the number of expected hits of a similar quality that could be found by chance, the lower the E-value, the less likely the match is down to chance. For this analysis, we have only included proteins with an E-value of 1 or less. The bit-score is a log2-scaled and normalised raw-score.

**Table S5: PCC 11910 proteins with no homologues in PCC 6803.** Proteins identified as having no homology to PCC 6803's proteins where a BLAST E-value of 1 was used, and are therefore described as truly unique from the PCC 6803's proteome. The NCBI ID was taken from the PCC 11901's proteome release CP040360.1. The Uniprot ID relates to the identification system used on the Uniprot database [2]. The name, amino acid length and calculated molecular weight was taken from the NCBI Protein Database, as well as the date that the information was added.

**Table S6: Potential PCC 11910 homologues of PCC 6803 proteins involved in electron transport and light harvesting.** Proteins were identified in Mills *et al.* [1]. The Uniprot ID relates to the identification system used on the Uniprot database [2]. The Uniprot ID amino acid sequence stored within this database was then used during the BLASTp function. All Gene Products, Gene Name, Other Gene Names, Localisation, Molecular Weight (kDa) and No of TMH's are derived from Baers *et al.* (2019) [3]. Each blast hit shows the NCBI Accession, in addition to the Percentage Identity Score, the length of the alignment number of mismatches as well as the number of gaps within the alignment. The species start and end refers to the start and end of the alignment within each species. The E-value refers to the number of expected hits of a similar quality that could be found by chance, the lower the E-value, the less likely the match is down to chance. For this analysis, we have only included proteins with an E-value of 1 or less. The bit-score is a log2-scaled and normalised raw-score.

## **Supplementary References**

1. Mills, L.A.; McCormick, A.J.; Lea-Smith, D.J. Current knowledge and recent advances in understanding metabolism of the model cyanobacterium *Synechocystis* sp. PCC 6803. *Biosci Rep* **2020**, *40*, BSR20193325.
2. UniProt, C. The Universal Protein Resource (UniProt) in 2010. *Nucleic Acids Res* **2010**, *38*, D142-148.
3. Baers, L.L.; Breckels, L.M.; Mills, L.A.; Gatto, L.; Deery, M.; Stevens, T.J.; Howe, C.J.; Lilley, K.S.; Lea-Smith, D.J. Proteome mapping of a cyanobacterium reveals distinct compartment organisation and cell-dispersed metabolism. *Plant Physiol* **2019**, *181*, 1721-1738.
