# Supplementary material for: Development of a Biotechnology Platform for the Fast-Growing Cyanobacterium Synechococcus sp. PCC 11901
Source: Biomolecules. 2022 Jun 23;12(7):872. doi: 10.3390/biom12070872 (PMC9313322; doi:10.3390/biom12070872)
Supplement: Supplementary file 1 [file biomolecules-12-00872-s001.zip]

Archive with 5 entries (5 files):
- Supplementary information_B.pdf
- Table S3.xlsx
- Table S4.xlsx
- Table S5.xlsx
- Table S6.xlsx
