# Supplementary material for: Development of a Biotechnology Platform for the Fast-Growing Cyanobacterium Synechococcus sp. PCC 11901
Source: Biomolecules. 2022 Jun 23;12(7):872. doi: 10.3390/biom12070872 (PMC9313322; doi:10.3390/biom12070872)
Supplement: Supplementary file 1 [file biomolecules-12-00872-s001.zip › Table S3.xlsx]

## Sheet: Sheet1
Accession	Uniprot Accession	Gene Product	Gene Name	Gene names in Literature	Functional Sub-Category	Functional Category	Localisation in PCC 6803	Svm Score	MW (kDa)	E-value	Bit Score
Table S3: PCC 11901 homologues of PCC 6803 proteins involved in central metabolism.
Central Metabolism
Glycolysis (Embden-Meyerhof-Parnas pathway)
sll0726	P74643	phosphoglucomutase	pgm	pgm	Glycolysis	Energy Metabolism	Soluble proteins	0.893680922	61.1	0.0
BLAST Output	PCC 11901 Accession	Percentage Identity	Alignment Length	Mismatches	Gap Open	Synechocystis sp. PCC 6803 Start	Synechocystis sp. PCC 6803 End	PCC 11901 Start	PCC 11901 End	E-value	Bit Score
tr|P74643|P74643_SYNY3	WP_030007883.1	28.131	519	302	18	58	562	9	470	2.94e-37	140
tr|P74643|P74643_SYNY3	WP_138073800.1	26.628	522	325	17	56	565	7	482	1.57e-23	100
tr|P74643|P74643_SYNY3	WP_138072422.1	22.761	536	323	19	37	557	11	470	6.13e-08	51.6
tr|P74643|P74643_SYNY3	WP_012305963.1	25.676	74	42	1	401	474	60	120	0.68	28.9
tr|P74643|P74643_SYNY3	WP_138071618.1	38.462	39	21	1	511	546	819	857	0.84	28.9
slr1334	P74027	phosphoglucomutase/phosphomannomutase		pgm	Glycolysis	Energy Metabolism	Soluble proteins	0.918372351	52.6	0.0
BLAST Output	PCC 11901 Accession	Percentage Identity	Alignment Length	Mismatches	Gap Open	Synechocystis sp. PCC 6803 Start	Synechocystis sp. PCC 6803 End	PCC 11901 Start	PCC 11901 End	E-value	Bit Score
tr|P74027|P74027_SYNY3	WP_138073800.1	56.994	479	205	1	7	484	8	486	0.0	522
tr|P74027|P74027_SYNY3	WP_030007883.1	37.069	464	272	7	7	464	8	457	5.81e-91	282
tr|P74027|P74027_SYNY3	WP_138072422.1	28.049	492	258	13	5	460	28	459	7.86e-28	112
tr|P74027|P74027_SYNY3	WP_138073052.1	36.170	47	30	0	408	454	370	416	0.20	30.8
slr1349	P52983	glucose-6-phosphate isomerase	pgi	pgi, slr1349	Glycolysis	Energy Metabolism	Soluble proteins	0.909963831	58.3	0.0
BLAST Output	PCC 11901 Accession	Percentage Identity	Alignment Length	Mismatches	Gap Open	Synechocystis sp. PCC 6803 Start	Synechocystis sp. PCC 6803 End	PCC 11901 Start	PCC 11901 End	E-value	Bit Score
sp|P52983|G6PI_SYNY3	WP_138073062.1	67.742	527	168	1	1	527	1	525	0.0	750
slr2094	P73922	fructose-1,6-/sedoheptulose-1,7-bisphosphatase	fbpI	fbpI, glpX, slr2094	Glycolysis	Energy Metabolism	Soluble proteins	0.910761429	37.1	0.0
BLAST Output	PCC 11901 Accession	Percentage Identity	Alignment Length	Mismatches	Gap Open	Synechocystis sp. PCC 6803 Start	Synechocystis sp. PCC 6803 End	PCC 11901 Start	PCC 11901 End	E-value	Bit Score
sp|P73922|FBSB_SYNY3	WP_012306921.1	84.058	345	54	1	1	344	1	345	0.0	592
sp|P73922|FBSB_SYNY3	WP_181445675.1	40.000	40	18	1	240	279	25	58	0.79	26.9
sp|P73922|FBSB_SYNY3	WP_138071472.1	38.462	26	16	0	190	215	226	251	0.86	27.7
slr0952	P74324	fructose-1,6-bisphosphatase	fbpII	fbp, fbpII, fdp, slr0952	Glycolysis	Energy Metabolism	Soluble proteins	0.907492451	38.2	0.0
BLAST Output	PCC 11901 Accession	Percentage Identity	Alignment Length	Mismatches	Gap Open	Synechocystis sp. PCC 6803 Start	Synechocystis sp. PCC 6803 End	PCC 11901 Start	PCC 11901 End	E-value	Bit Score
sp|P74324|F16PA_SYNY3	WP_012305963.1	82.779	331	57	0	13	343	14	344	0.0	583
sll1196	P72830	phosphofructokinase	pgk1	pfkA, pfkB1, sll1196	Glycolysis	Energy Metabolism	Soluble proteins	0.897640225	38.6	0.0
BLAST Output	PCC 11901 Accession	Percentage Identity	Alignment Length	Mismatches	Gap Open	Synechocystis sp. PCC 6803 Start	Synechocystis sp. PCC 6803 End	PCC 11901 Start	PCC 11901 End	E-value	Bit Score
sp|P72830|PFKA1_SYNY3	WP_138072110.1	67.778	360	116	0	1	360	1	360	1.36e-176	491
sll0745	Q55988	phosphofructokinase	pfk2	pfkA, pfkB2, sll0745	Glycolysis	Energy Metabolism	Soluble proteins	1.0	41.7	0.0
BLAST Output	PCC 11901 Accession	Percentage Identity	Alignment Length	Mismatches	Gap Open	Synechocystis sp. PCC 6803 Start	Synechocystis sp. PCC 6803 End	PCC 11901 Start	PCC 11901 End	E-value	Bit Score
sp|Q55988|PFKA2_SYNY3	WP_138072110.1	41.131	389	187	8	4	383	5	360	3.21e-82	252
sp|Q55988|PFKA2_SYNY3	WP_138071512.1	15.652	115	97	0	119	233	456	570	0.071	31.6
sp|Q55988|PFKA2_SYNY3	WP_138073078.1	22.143	140	88	5	215	345	140	267	0.99	28.1
slr0943	P74309	fructose-bisphosphate aldolase, class I	fba1	fda, fbaI, slr0943	Glycolysis	Energy Metabolism	Soluble proteins	1.0	33.1	0.0
No hits
sll0018	Q55664	fructose-bisphosphate aldolase, class II	fba2	fda, cbbA, cfxA, fbaA, fbaII, sll0018	Glycolysis	Energy Metabolism	Soluble proteins	0.921532482	38.9	0.0
BLAST Output	PCC 11901 Accession	Percentage Identity	Alignment Length	Mismatches	Gap Open	Synechocystis sp. PCC 6803 Start	Synechocystis sp. PCC 6803 End	PCC 11901 Start	PCC 11901 End	E-value	Bit Score
sp|Q55664|ALF2_SYNY3	WP_030006557.1	90.652	353	33	0	1	353	1	353	0.0	677
sp|Q55664|ALF2_SYNY3	WP_138073301.1	27.885	104	65	4	224	322	77	175	0.42	28.9
slr0783	Q59994	triosephosphate isomerase	tpi	tpiA, tpi, slr0783	Glycolysis	Energy Metabolism	Soluble proteins	0.871041592	26.1	0.0
BLAST Output	PCC 11901 Accession	Percentage Identity	Alignment Length	Mismatches	Gap Open	Synechocystis sp. PCC 6803 Start	Synechocystis sp. PCC 6803 End	PCC 11901 Start	PCC 11901 End	E-value	Bit Score
sp|Q59994|TPIS_SYNY3	WP_138072586.1	75.000	240	60	0	1	240	1	240	2.65e-137	382
sp|Q59994|TPIS_SYNY3	WP_138071305.1	26.966	89	56	3	20	108	164	243	0.21	28.9
slr0884	P49433	glyceraldehyde 3-phosphate dehydrogenase 1 (NAD+)	gap1	gap1, slr0884	Glycolysis	Energy Metabolism	Soluble proteins	0.917497432	37.9	0.0
BLAST Output	PCC 11901 Accession	Percentage Identity	Alignment Length	Mismatches	Gap Open	Synechocystis sp. PCC 6803 Start	Synechocystis sp. PCC 6803 End	PCC 11901 Start	PCC 11901 End	E-value	Bit Score
sp|P49433|G3P1_SYNY3	WP_138071752.1	66.567	335	112	0	2	336	4	338	1.73e-173	482
sp|P49433|G3P1_SYNY3	WP_012305745.1	48.512	336	169	3	1	334	1	334	6.45e-108	315
sp|P49433|G3P1_SYNY3	WP_138071033.1	29.032	62	32	1	29	78	94	155	0.24	29.6
sp|P49433|G3P1_SYNY3	WP_138072258.1	23.333	90	54	2	264	338	324	413	0.80	28.1
sll1342	P80505	NAD(P)-dependent glyceraldehyde-3-phosphate dehydrogenase	gap2	gap2, G3p2, sll1342	Glycolysis	Energy Metabolism	Soluble proteins	0.698756945	36.5	0.0
BLAST Output	PCC 11901 Accession	Percentage Identity	Alignment Length	Mismatches	Gap Open	Synechocystis sp. PCC 6803 Start	Synechocystis sp. PCC 6803 End	PCC 11901 Start	PCC 11901 End	E-value	Bit Score
sp|P80505|G3P2_SYNY3	WP_012305745.1	77.151	337	77	0	1	337	1	337	0.0	532
sp|P80505|G3P2_SYNY3	WP_138071752.1	51.376	327	155	3	4	328	6	330	3.48e-112	327
sp|P80505|G3P2_SYNY3	WP_138073356.1	27.778	72	50	1	54	125	60	129	0.54	28.5
sp|P80505|G3P2_SYNY3	WP_138073654.1	36.207	58	31	4	52	106	65	119	0.75	28.1
slr0394	P74421	phosphoglycerate kinase	pgk	pgk, slr0394	Glycolysis	Energy Metabolism	Soluble proteins	1.0	41.6	0.0
BLAST Output	PCC 11901 Accession	Percentage Identity	Alignment Length	Mismatches	Gap Open	Synechocystis sp. PCC 6803 Start	Synechocystis sp. PCC 6803 End	PCC 11901 Start	PCC 11901 End	E-value	Bit Score
sp|P74421|PGK_SYNY3	WP_138073335.1	81.250	400	71	2	2	400	1	397	0.0	635
sp|P74421|PGK_SYNY3	WP_012305858.1	31.579	57	35	1	172	228	54	106	0.11	30.8
sp|P74421|PGK_SYNY3	WP_138073446.1	31.707	41	28	0	111	151	30	70	0.33	27.3
slr1945	P74507	2,3-bisphosphoglycerate-independent phosphoglycerate mutase	gpm	yibO, pgm, slr1945	Glycolysis	Energy Metabolism	Soluble proteins	0.786427067	57.9	0.0
BLAST Output	PCC 11901 Accession	Percentage Identity	Alignment Length	Mismatches	Gap Open	Synechocystis sp. PCC 6803 Start	Synechocystis sp. PCC 6803 End	PCC 11901 Start	PCC 11901 End	E-value	Bit Score
sp|P74507|GPMI_SYNY3	WP_012307831.1	70.817	514	150	0	1	514	1	514	0.0	724
sp|P74507|GPMI_SYNY3	WP_138071782.1	37.931	29	18	0	107	135	582	610	0.67	28.9
slr0752	P77972	enolase	eno	eno	Glycolysis	Energy Metabolism	Soluble proteins	0.762128892	46.5	0.0
BLAST Output	PCC 11901 Accession	Percentage Identity	Alignment Length	Mismatches	Gap Open	Synechocystis sp. PCC 6803 Start	Synechocystis sp. PCC 6803 End	PCC 11901 Start	PCC 11901 End	E-value	Bit Score
sp|P77972|ENO_SYNY3	WP_012305714.1	76.977	430	98	1	1	430	1	429	0.0	640
sp|P77972|ENO_SYNY3	WP_138073567.1	43.750	32	17	1	269	300	41	71	0.39	28.9
sll0587	Q55863	pyruvate kinase	pyk1	pyk1, pk, pykF, sll0587, pyk	Glycolysis	Energy Metabolism	Soluble proteins	0.927905843	52.0	0.0
BLAST Output	PCC 11901 Accession	Percentage Identity	Alignment Length	Mismatches	Gap Open	Synechocystis sp. PCC 6803 Start	Synechocystis sp. PCC 6803 End	PCC 11901 Start	PCC 11901 End	E-value	Bit Score
sp|Q55863|KPYK1_SYNY3	WP_012307271.1	45.053	475	253	6	12	482	4	474	4.46e-129	384
sll1275	P73534	pyruvate kinase 2	pyk2	pyk2, pk, pyk	Glycolysis	Energy Metabolism	Soluble proteins	1.0	62.9	0.0
BLAST Output	PCC 11901 Accession	Percentage Identity	Alignment Length	Mismatches	Gap Open	Synechocystis sp. PCC 6803 Start	Synechocystis sp. PCC 6803 End	PCC 11901 Start	PCC 11901 End	E-value	Bit Score
sp|P73534|KPYK2_SYNY3	WP_012307271.1	72.384	583	159	1	1	583	1	581	0.0	865
sp|P73534|KPYK2_SYNY3	WP_138072200.1	31.624	117	77	1	472	585	387	503	9.72e-12	64.3
sp|P73534|KPYK2_SYNY3	WP_138072236.1	20.619	97	77	0	482	578	789	885	0.003	37.0
sp|P73534|KPYK2_SYNY3	WP_138073538.1	43.182	44	24	1	430	473	409	451	0.44	30.0
sp|P73534|KPYK2_SYNY3	WP_138071744.1	30.973	113	58	5	331	426	289	398	0.78	28.9
slr0301	Q55905	phosphoenolpyruvate synthase	pps	ppsA, pps	Glycolysis	Energy Metabolism	Soluble proteins	0.932147382	89.9	0.0
BLAST Output	PCC 11901 Accession	Percentage Identity	Alignment Length	Mismatches	Gap Open	Synechocystis sp. PCC 6803 Start	Synechocystis sp. PCC 6803 End	PCC 11901 Start	PCC 11901 End	E-value	Bit Score
sp|Q55905|PPSA_SYNY3	WP_138072200.1	74.820	834	192	3	1	818	1	832	0.0	1305
sp|Q55905|PPSA_SYNY3	WP_012307271.1	36.697	109	66	1	379	487	477	582	2.27e-16	79.7
sp|Q55905|PPSA_SYNY3	WP_138072236.1	24.176	91	69	0	383	473	790	880	1.51e-04	41.6
slr1934	P74490	pyruvate dehydrogenase E1 component, alpha subunit	pdhA	pdhA	Pyruvate dehydrogenase	Energy Metabolism	Soluble proteins	0.816247765	38.1	0.0
BLAST Output	PCC 11901 Accession	Percentage Identity	Alignment Length	Mismatches	Gap Open	Synechocystis sp. PCC 6803 Start	Synechocystis sp. PCC 6803 End	PCC 11901 Start	PCC 11901 End	E-value	Bit Score
tr|P74490|P74490_SYNY3	WP_138073755.1	78.070	342	75	0	1	342	1	342	0.0	576
tr|P74490|P74490_SYNY3	WP_062433464.1	29.730	37	26	0	245	281	267	303	0.50	28.5
tr|P74490|P74490_SYNY3	WP_138071857.1	25.767	163	76	9	111	256	424	558	0.65	28.1
sll1721	P73405	pyruvate dehydrogenase E1 component, beta subunit	pdhB	pdhB	Pyruvate dehydrogenase	Energy Metabolism	Soluble proteins	0.83912381	35.7	0.0
BLAST Output	PCC 11901 Accession	Percentage Identity	Alignment Length	Mismatches	Gap Open	Synechocystis sp. PCC 6803 Start	Synechocystis sp. PCC 6803 End	PCC 11901 Start	PCC 11901 End	E-value	Bit Score
tr|P73405|P73405_SYNY3	WP_012306284.1	84.568	324	50	0	1	324	1	324	0.0	573
tr|P73405|P73405_SYNY3	WP_062433464.1	23.693	287	199	8	39	321	354	624	2.71e-13	67.0
tr|P73405|P73405_SYNY3	WP_138073601.1	29.630	81	43	5	20	91	221	296	0.53	28.5
sll1841	P74510	pyruvate dehydrogenase dihydrolipoamide acetyltransferase component (E2)	pdhC	odhB, citM, pdhC	Pyruvate dehydrogenase	Energy Metabolism	Small ribosomal protein	0.838427819	44.9	0.0
BLAST Output	PCC 11901 Accession	Percentage Identity	Alignment Length	Mismatches	Gap Open	Synechocystis sp. PCC 6803 Start	Synechocystis sp. PCC 6803 End	PCC 11901 Start	PCC 11901 End	E-value	Bit Score
tr|P74510|P74510_SYNY3	WP_138072065.1	65.675	437	145	2	1	433	1	436	0.0	543
tr|P74510|P74510_SYNY3	WP_138072009.1	36.000	50	32	0	27	76	113	162	0.089	30.4
slr1096	P72740	dihydrolipoamide dehydrogenase	pdhD	phdD, lpd, pdhD	Pyruvate dehydrogenase	Energy Metabolism	Soluble proteins	0.836060072	50.8	0.0
BLAST Output	PCC 11901 Accession	Percentage Identity	Alignment Length	Mismatches	Gap Open	Synechocystis sp. PCC 6803 Start	Synechocystis sp. PCC 6803 End	PCC 11901 Start	PCC 11901 End	E-value	Bit Score
sp|P72740|DLDH_SYNY3	WP_138073081.1	80.810	469	90	0	5	473	6	474	0.0	768
sp|P72740|DLDH_SYNY3	WP_138073175.1	31.712	473	279	15	6	465	4	445	5.19e-52	179
sp|P72740|DLDH_SYNY3	WP_138073182.1	22.667	450	278	17	6	450	15	399	4.55e-05	42.0
sp|P72740|DLDH_SYNY3	WP_138072806.1	46.667	30	16	0	7	36	16	45	0.012	34.3
sp|P72740|DLDH_SYNY3	WP_138073605.1	25.112	223	139	10	180	392	154	358	0.019	33.5
sp|P72740|DLDH_SYNY3	WP_138072945.1	30.000	80	46	3	4	73	7	86	0.20	30.4
sp|P72740|DLDH_SYNY3	WP_138073777.1	33.333	54	32	1	180	233	3	52	0.21	30.0
sp|P72740|DLDH_SYNY3	WP_138073622.1	32.308	65	33	3	220	284	65	118	0.26	29.3
sp|P72740|DLDH_SYNY3	WP_138071796.1	25.581	86	56	2	242	323	205	286	0.86	28.5
sll0741	P52965	pyruvate flavodoxin oxidoreductase	PFOR	nifJ, Pfo, PFOR	Pyruvate dehydrogenase	Energy Metabolism	Soluble proteins	0.867448884	131.4	0.0
BLAST Output	PCC 11901 Accession	Percentage Identity	Alignment Length	Mismatches	Gap Open	Synechocystis sp. PCC 6803 Start	Synechocystis sp. PCC 6803 End	PCC 11901 Start	PCC 11901 End	E-value	Bit Score
sp|P52965|NIFJ_SYNY3	WP_138073249.1	72.071	1178	323	3	1	1175	1	1175	0.0	1799
sp|P52965|NIFJ_SYNY3	WP_012306860.1	32.099	81	35	3	688	768	8	68	4.71e-05	39.7
sp|P52965|NIFJ_SYNY3	WP_012306860.1	41.667	36	16	2	686	719	42	74	0.039	31.2
sp|P52965|NIFJ_SYNY3	WP_012307203.1	28.916	83	32	5	678	757	1	59	0.004	34.3
sp|P52965|NIFJ_SYNY3	WP_012307405.1	28.947	76	29	3	684	759	78	128	0.020	33.5
sp|P52965|NIFJ_SYNY3	WP_138073334.1	24.051	79	39	2	688	758	23	88	0.094	33.1
sp|P52965|NIFJ_SYNY3	WP_138072148.1	29.213	89	47	5	672	757	128	203	0.34	30.8
sp|P52965|NIFJ_SYNY3	WP_138072396.1	32.432	37	25	0	677	713	323	359	0.65	30.0
sp|P52965|NIFJ_SYNY3	WP_138073788.1	24.370	119	75	5	285	403	161	264	0.70	30.0
sp|P52965|NIFJ_SYNY3	WP_138073720.1	43.478	23	13	0	688	710	132	154	0.87	29.6
sp|P52965|NIFJ_SYNY3	WP_012306715.1	37.037	54	30	3	784	835	142	193	0.90	29.6
sp|P52965|NIFJ_SYNY3	WP_138073530.1	24.324	111	59	5	690	786	187	286	0.96	29.6
Pentose Phosphate Pathways/ Calvin-Benson-Bassham cycle
slr1843	P73411	ribose 5-phosphate isomerase	zwf	zwf, slr1843	Pentose phosphate pathway	Energy Metabolism	Soluble proteins	1.0	57.8	0.0
BLAST Output	PCC 11901 Accession	Percentage Identity	Alignment Length	Mismatches	Gap Open	Synechocystis sp. PCC 6803 Start	Synechocystis sp. PCC 6803 End	PCC 11901 Start	PCC 11901 End	E-value	Bit Score
sp|P73411|G6PD_SYNY3	WP_030007170.1	80.550	509	99	0	1	509	1	509	0.0	887
slr1734	P73720	glucose 6-phosphate dehydrogenase assembly protein	opcA	opcA	Pentose phosphate pathway	Energy Metabolism	Soluble proteins	0.924685447	52.0	0.0
BLAST Output	PCC 11901 Accession	Percentage Identity	Alignment Length	Mismatches	Gap Open	Synechocystis sp. PCC 6803 Start	Synechocystis sp. PCC 6803 End	PCC 11901 Start	PCC 11901 End	E-value	Bit Score
sp|P73720|OPCA_SYNY3	WP_065710675.1	58.444	450	180	3	22	471	3	445	0.0	538
sp|P73720|OPCA_SYNY3	WP_138072037.1	51.220	41	20	0	77	117	179	219	2.43e-05	42.0
sp|P73720|OPCA_SYNY3	WP_168191103.1	33.962	53	33	1	77	127	71	123	0.39	29.6
sll0329	P52208	6-phosphogluconate dehydrogenase	gnd	gnd	Pentose phosphate pathway	Energy Metabolism	Soluble proteins	1.0	52.8	0.0
BLAST Output	PCC 11901 Accession	Percentage Identity	Alignment Length	Mismatches	Gap Open	Synechocystis sp. PCC 6803 Start	Synechocystis sp. PCC 6803 End	PCC 11901 Start	PCC 11901 End	E-value	Bit Score
sp|P52208|6PGD_SYNY3	WP_012305858.1	80.550	473	89	1	8	480	1	470	0.0	792
sp|P52208|6PGD_SYNY3	WP_138073324.1	25.847	236	145	9	8	232	1	217	8.01e-08	50.1
sp|P52208|6PGD_SYNY3	WP_138073165.1	41.026	39	23	0	91	129	107	145	0.60	28.9
sp|P52208|6PGD_SYNY3	WP_138073335.1	29.825	57	36	1	61	113	172	228	0.69	28.9
sll1525	P37101	phosphoribulokinase	prk	prk, ptk, sll1525	Pentose phosphate pathway	Energy Metabolism	Soluble proteins	0.753648682	37.9	0.0
BLAST Output	PCC 11901 Accession	Percentage Identity	Alignment Length	Mismatches	Gap Open	Synechocystis sp. PCC 6803 Start	Synechocystis sp. PCC 6803 End	PCC 11901 Start	PCC 11901 End	E-value	Bit Score
sp|P37101|KPPR_SYNY3	WP_012308260.1	83.784	333	53	1	1	332	1	333	0.0	595
sp|P37101|KPPR_SYNY3	WP_030008311.1	27.230	213	118	10	10	188	7	216	6.75e-11	58.9
sp|P37101|KPPR_SYNY3	WP_012307853.1	42.857	35	18	1	13	47	48	80	0.12	30.4
sp|P37101|KPPR_SYNY3	WP_138073683.1	47.826	23	12	0	10	32	320	342	0.14	30.4
sp|P37101|KPPR_SYNY3	WP_138073683.1	54.545	22	10	0	11	32	39	60	0.16	30.0
sp|P37101|KPPR_SYNY3	WP_138072881.1	52.174	23	11	0	4	26	30	52	0.19	29.6
sp|P37101|KPPR_SYNY3	WP_138072072.1	50.000	22	11	0	11	32	363	384	0.19	30.0
sp|P37101|KPPR_SYNY3	WP_012305491.1	57.143	21	9	0	11	31	54	74	0.25	29.3
sp|P37101|KPPR_SYNY3	WP_138071988.1	24.390	123	79	5	4	112	97	219	0.40	28.9
sp|P37101|KPPR_SYNY3	WP_012307505.1	66.667	21	4	1	15	32	46	66	0.58	28.1
sp|P37101|KPPR_SYNY3	WP_138071561.1	57.895	19	8	0	13	31	40	58	0.66	28.1
sll0807	P74061	pentose-5-phosphate-3-epimerase	rpe	rpe, cfxE, sll0807	Pentose phosphate pathway	Energy Metabolism	Soluble proteins	0.907191453	25.0	0.0
BLAST Output	PCC 11901 Accession	Percentage Identity	Alignment Length	Mismatches	Gap Open	Synechocystis sp. PCC 6803 Start	Synechocystis sp. PCC 6803 End	PCC 11901 Start	PCC 11901 End	E-value	Bit Score
sp|P74061|RPE_SYNY3	WP_012305958.1	85.586	222	32	0	3	224	4	225	5.63e-143	395
sp|P74061|RPE_SYNY3	WP_030006780.1	27.027	37	27	0	5	41	37	73	0.20	27.3
sp|P74061|RPE_SYNY3	WP_012306193.1	28.829	111	62	6	118	219	152	254	0.20	28.9
slr0194	Q55766	ribose 5-phosphate isomerase	rpiA	rpiA	Pentose phosphate pathway	Energy Metabolism	Unknown	0.472467032	24.7	0.0
BLAST Output	PCC 11901 Accession	Percentage Identity	Alignment Length	Mismatches	Gap Open	Synechocystis sp. PCC 6803 Start	Synechocystis sp. PCC 6803 End	PCC 11901 Start	PCC 11901 End	E-value	Bit Score
sp|Q55766|RPIA_SYNY3	WP_138073158.1	79.741	232	47	0	4	235	1	232	1.41e-135	377
sp|Q55766|RPIA_SYNY3	WP_138072562.1	26.471	68	44	1	117	184	144	205	0.15	29.3
sp|Q55766|RPIA_SYNY3	WP_138073535.1	48.276	29	15	0	31	59	167	195	0.24	28.9
sp|Q55766|RPIA_SYNY3	WP_065711048.1	35.417	48	18	2	65	112	443	477	0.43	28.1
ssl2153	P74234	probable ribose phosphate isomerase B	rpiB	rpiB, ssl2153	Pentose phosphate pathway	Energy Metabolism
BLAST Output	PCC 11901 Accession	Percentage Identity	Alignment Length	Mismatches	Gap Open	Synechocystis sp. PCC 6803 Start	Synechocystis sp. PCC 6803 End	PCC 11901 Start	PCC 11901 End	E-value	Bit Score
tr|P74234|P74234_SYNY3	WP_138071692.1	27.273	55	28	2	25	79	110	152	0.47	25.4
tr|P74234|P74234_SYNY3	WP_030007972.1	28.571	35	25	0	58	92	23	57	0.98	24.6
sll1070	P73282	transketolase	tpi	tktA, sll1070	Pentose phosphate pathway	Energy Metabolism	Soluble proteins	0.909838217	71.7	0.0
BLAST Output	PCC 11901 Accession	Percentage Identity	Alignment Length	Mismatches	Gap Open	Synechocystis sp. PCC 6803 Start	Synechocystis sp. PCC 6803 End	PCC 11901 Start	PCC 11901 End	E-value	Bit Score
tr|P73282|P73282_SYNY3	WP_138073018.1	77.130	669	151	1	1	669	1	667	0.0	1043
tr|P73282|P73282_SYNY3	WP_062433464.1	29.252	147	86	7	363	504	323	456	0.001	38.1
tr|P73282|P73282_SYNY3	WP_062433464.1	31.429	70	38	1	126	195	119	178	0.26	30.8
slr1793	P72797	transaldolase	tal	talB, tal, slr1793	Pentose phosphate pathway	Energy Metabolism	Soluble proteins	1.0	41.6	0.0
BLAST Output	PCC 11901 Accession	Percentage Identity	Alignment Length	Mismatches	Gap Open	Synechocystis sp. PCC 6803 Start	Synechocystis sp. PCC 6803 End	PCC 11901 Start	PCC 11901 End	E-value	Bit Score
sp|P72797|TAL_SYNY3	WP_030007169.1	39.024	82	45	1	95	176	106	182	8.89e-08	50.1
sp|P72797|TAL_SYNY3	WP_138073352.1	19.626	107	80	2	136	242	8	108	0.41	29.3
Entner-Doudoroff Pathway
sll1709	P73684	3-ketoacyl-acyl carrier protein reductase	gdh	gdh	Pentose phosphate pathway	Energy Metabolism
BLAST Output	PCC 11901 Accession	Percentage Identity	Alignment Length	Mismatches	Gap Open	Synechocystis sp. PCC 6803 Start	Synechocystis sp. PCC 6803 End	PCC 11901 Start	PCC 11901 End	E-value	Bit Score
tr|P73684|P73684_SYNY3	WP_012305942.1	35.246	244	153	3	3	246	1	239	5.36e-41	137
tr|P73684|P73684_SYNY3	WP_138071343.1	29.796	245	161	5	3	242	11	249	7.56e-27	101
tr|P73684|P73684_SYNY3	WP_138071622.1	24.571	175	120	3	2	173	406	571	2.97e-10	56.6
tr|P73684|P73684_SYNY3	WP_012307288.1	27.642	246	165	9	1	237	2	243	1.18e-07	47.8
tr|P73684|P73684_SYNY3	WP_138073537.1	25.424	177	125	4	6	177	2	176	6.49e-06	42.7
tr|P73684|P73684_SYNY3	WP_138072043.1	29.078	141	86	6	51	186	37	168	9.17e-05	38.9
tr|P73684|P73684_SYNY3	WP_138073277.1	21.678	143	102	4	5	143	13	149	0.001	36.2
tr|P73684|P73684_SYNY3	WP_138072164.1	24.204	157	107	3	6	151	6	161	0.22	28.9
tr|P73684|P73684_SYNY3	WP_138073101.1	33.871	62	36	1	6	67	1777	1833	0.45	28.5
tr|P73684|P73684_SYNY3	WP_138073112.1	37.705	61	35	3	14	73	741	799	0.90	27.3
tr|P73684|P73684_SYNY3	WP_138071521.1	23.404	188	125	5	1	186	176	346	0.96	26.9
slr0329	Q55855	glucokinase	glk	xylR	Unknown Proteins	Unknown Proteins	Soluble proteins	0.949399639	34.6	0.0
	WP_138071418	55.25	293	132		32	325	4	298	2e-115	332
slr0452	P74689	dihydroxyacid dehydratase	edd	ilvD	Isoleucine, valine, leucine biosynthesis	Amino acid biosynthesis	Soluble proteins	0.891295412	58.6	0.0
BLAST Output	PCC 11901 Accession	Percentage Identity	Alignment Length	Mismatches	Gap Open	Synechocystis sp. PCC 6803 Start	Synechocystis sp. PCC 6803 End	PCC 11901 Start	PCC 11901 End	E-value	Bit Score
sp|P74689|ILVD_SYNY3	WP_030005899.1	81.462	561	104	0	1	561	1	561	0.0	954
sp|P74689|ILVD_SYNY3	WP_138073144.1	34.783	46	29	1	312	357	91	135	0.78	28.1
sp|P74689|ILVD_SYNY3	WP_099238053.1	30.000	50	28	1	442	484	53	102	0.91	28.5
sll0107	Q55872	KDPG aldolase	eda	eda, hga	Unknown Proteins	Unknown Proteins
BLAST Output	PCC 11901 Accession	Percentage Identity	Alignment Length	Mismatches	Gap Open	Synechocystis sp. PCC 6803 Start	Synechocystis sp. PCC 6803 End	PCC 11901 Start	PCC 11901 End	E-value	Bit Score
tr|Q55872|Q55872_SYNY3	WP_138072084.1	52.062	194	93	0	2	195	12	205	4.71e-68	204
Carbon Fixation
slr0011	Q55670	possible Rubisco chaperonin	rbcX	rbcX	Rubisco	Photosynthesis & Respiration	Soluble proteins	0.82458318	15.3	0.0
BLAST Output	PCC 11901 Accession	Percentage Identity	Alignment Length	Mismatches	Gap Open	Synechocystis sp. PCC 6803 Start	Synechocystis sp. PCC 6803 End	PCC 11901 Start	PCC 11901 End	E-value	Bit Score
sp|Q55670|RBCX_SYNY3	WP_030006358.1	50.000	132	65	1	3	134	1	131	9.93e-38	122
sp|Q55670|RBCX_SYNY3	WP_138071654.1	52.381	21	10	0	2	22	691	711	0.42	26.9
slr0009	P54205	ribulose bisphosphate carboxylase large subunit	rbcL	rbcL, slr0009	Rubisco	Photosynthesis & Respiration	Unknown	0.675162804	52.5	0.0
BLAST Output	PCC 11901 Accession	Percentage Identity	Alignment Length	Mismatches	Gap Open	Synechocystis sp. PCC 6803 Start	Synechocystis sp. PCC 6803 End	PCC 11901 Start	PCC 11901 End	E-value	Bit Score
sp|P54205|RBL_SYNY3	WP_012307409.1	92.357	471	35	1	1	470	1	471	0.0	900
sp|P54205|RBL_SYNY3	WP_138071636.1	65.217	23	5	1	405	424	155	177	0.81	28.5
slr0012	P54206	ribulose bisphosphate carboxylase small subunit	rbcS	rbcS, slr0012	Rubisco	Photosynthesis & Respiration	Unknown	0.609316621	13.2	0.0
BLAST Output	PCC 11901 Accession	Percentage Identity	Alignment Length	Mismatches	Gap Open	Synechocystis sp. PCC 6803 Start	Synechocystis sp. PCC 6803 End	PCC 11901 Start	PCC 11901 End	E-value	Bit Score
sp|P54206|RBS_SYNY3	WP_012307407.1	74.545	110	28	0	1	110	1	110	8.61e-65	188
sp|P54206|RBS_SYNY3	WP_138073466.1	25.581	86	62	1	24	109	461	544	9.22e-06	39.7
sp|P54206|RBS_SYNY3	WP_138073466.1	24.706	85	62	1	24	108	351	433	0.001	33.9
sp|P54206|RBS_SYNY3	WP_138073466.1	24.096	83	61	1	24	106	581	661	0.005	32.0
Photorespiration/Glycine and Serine Biosynthesis
sll1349	P73525	phosphoglycolate phosphatase	pgp	cbbZp, pgp	Glycolate metabolism	Energy Metabolism	PM	0.804113371	25.0	0.0
BLAST Output	PCC 11901 Accession	Percentage Identity	Alignment Length	Mismatches	Gap Open	Synechocystis sp. PCC 6803 Start	Synechocystis sp. PCC 6803 End	PCC 11901 Start	PCC 11901 End	E-value	Bit Score
tr|P73525|P73525_SYNY3	WP_099237296.1	23.246	228	148	5	3	206	25	249	5.87e-09	51.6
tr|P73525|P73525_SYNY3	WP_012307563.1	23.618	199	126	8	3	177	4	200	0.016	32.0
tr|P73525|P73525_SYNY3	WP_030006614.1	27.885	104	71	3	90	190	127	229	0.045	30.8
tr|P73525|P73525_SYNY3	WP_138072486.1	22.791	215	140	10	6	198	4	214	0.060	30.4
tr|P73525|P73525_SYNY3	WP_138073624.1	28.090	89	57	3	15	98	395	481	0.51	27.7
slr0458	P74697	putative phosphoglycolate phosphatase			Unknown Proteins	Unknown Proteins	Unknown	0.614052905	23.3	0.0
BLAST Output	PCC 11901 Accession	Percentage Identity	Alignment Length	Mismatches	Gap Open	Synechocystis sp. PCC 6803 Start	Synechocystis sp. PCC 6803 End	PCC 11901 Start	PCC 11901 End	E-value	Bit Score
tr|P74697|P74697_SYNY3	WP_138072816.1	26.061	165	89	8	6	148	5	158	0.35	27.7
tr|P74697|P74697_SYNY3	WP_138073664.1	31.579	38	26	0	1	38	1	38	0.37	27.7
tr|P74697|P74697_SYNY3	WP_138072486.1	20.513	117	72	4	7	109	4	113	0.63	26.9
tr|P74697|P74697_SYNY3	WP_012307563.1	35.135	37	23	1	1	36	1	37	0.65	26.9
slr0586	P74722	putative phosphoglycolate phosphatase			Random proteins (Hypothetical)	Random proteins (Hypothetical)	Soluble proteins	0.731286976	29.6	0.0
BLAST Output	PCC 11901 Accession	Percentage Identity	Alignment Length	Mismatches	Gap Open	Synechocystis sp. PCC 6803 Start	Synechocystis sp. PCC 6803 End	PCC 11901 Start	PCC 11901 End	E-value	Bit Score
tr|P74722|P74722_SYNY3	WP_138072486.1	46.429	224	119	1	28	250	1	224	2.32e-62	192
tr|P74722|P74722_SYNY3	WP_099237296.1	35.685	241	133	6	29	255	27	259	1.25e-38	132
tr|P74722|P74722_SYNY3	WP_012307513.1	32.759	58	35	1	199	252	134	191	0.026	31.6
slr1762	P73039	putative phosphoglycolate phosphatase			Random proteins (Hypothetical)	Random proteins (Hypothetical)	Soluble proteins	0.764285308	26.9	0.0
BLAST Output	PCC 11901 Accession	Percentage Identity	Alignment Length	Mismatches	Gap Open	Synechocystis sp. PCC 6803 Start	Synechocystis sp. PCC 6803 End	PCC 11901 Start	PCC 11901 End	E-value	Bit Score
tr|P73039|P73039_SYNY3	WP_030006614.1	43.318	217	118	3	2	218	31	242	4.19e-46	150
tr|P73039|P73039_SYNY3	WP_138073606.1	25.000	92	69	0	86	177	105	196	2.98e-04	37.4
tr|P73039|P73039_SYNY3	WP_099237296.1	29.000	100	65	2	92	185	118	217	0.005	33.9
sll0404	Q55124	glycolate oxidase subunit GlcD	glcD1	glcD, glcD1	Glycolate metabolism	Energy Metabolism	Unknown	0.370772678	53.0	0.0
BLAST Output	PCC 11901 Accession	Percentage Identity	Alignment Length	Mismatches	Gap Open	Synechocystis sp. PCC 6803 Start	Synechocystis sp. PCC 6803 End	PCC 11901 Start	PCC 11901 End	E-value	Bit Score
tr|Q55124|Q55124_SYNY3	WP_138071937.1	66.465	495	158	2	3	492	2	493	0.0	701
tr|Q55124|Q55124_SYNY3	WP_138072714.1	26.389	216	157	2	45	259	33	247	1.01e-17	81.6
tr|Q55124|Q55124_SYNY3	WP_138073921.1	26.415	106	54	4	352	451	29	116	0.12	30.8
tr|Q55124|Q55124_SYNY3	WP_012305900.1	29.167	72	48	1	284	352	105	176	0.34	29.6
tr|Q55124|Q55124_SYNY3	WP_138073452.1	30.682	88	52	4	283	369	525	604	0.72	28.9
slr0806	P74033	hypothetical protein	glcD2	glcD2	Glycolate metabolism	Energy Metabolism	Soluble proteins	0.84111084	48.0	0.0
BLAST Output	PCC 11901 Accession	Percentage Identity	Alignment Length	Mismatches	Gap Open	Synechocystis sp. PCC 6803 Start	Synechocystis sp. PCC 6803 End	PCC 11901 Start	PCC 11901 End	E-value	Bit Score
tr|P74033|P74033_SYNY3	WP_138071937.1	32.778	180	103	4	45	212	50	223	3.13e-14	70.9
tr|P74033|P74033_SYNY3	WP_138072714.1	28.319	113	66	2	112	214	103	210	0.097	31.2
tr|P74033|P74033_SYNY3	WP_181445677.1	29.825	57	40	0	35	91	264	320	0.44	29.3
sll1559	P74281	aminotransferase	ggt	sll1559	Glycolate metabolism	Energy Metabolism	Soluble proteins	0.873675691	40.7	0.0
BLAST Output	PCC 11901 Accession	Percentage Identity	Alignment Length	Mismatches	Gap Open	Synechocystis sp. PCC 6803 Start	Synechocystis sp. PCC 6803 End	PCC 11901 Start	PCC 11901 End	E-value	Bit Score
tr|P74281|P74281_SYNY3	WP_138073193.1	67.671	365	117	1	1	365	1	364	0.0	506
tr|P74281|P74281_SYNY3	WP_138072124.1	32.370	346	222	7	5	343	23	363	1.19e-56	186
tr|P74281|P74281_SYNY3	WP_138071295.1	25.243	309	175	14	11	285	24	310	1.50e-07	49.3
slr0879	P73560	glycine decarboxylase complex H-protein	gcvH	gcvH	Glycine breakdown	Energy Metabolism	Soluble proteins	0.822554444	14.6	0.0
BLAST Output	PCC 11901 Accession	Percentage Identity	Alignment Length	Mismatches	Gap Open	Synechocystis sp. PCC 6803 Start	Synechocystis sp. PCC 6803 End	PCC 11901 Start	PCC 11901 End	E-value	Bit Score
sp|P73560|GCSH_SYNY3	WP_012305985.1	61.905	126	46	2	1	125	1	125	1.29e-52	159
sp|P73560|GCSH_SYNY3	WP_012308340.1	40.000	35	21	0	10	44	62	96	0.11	27.7
slr0293	P74416	glycine dehydrogenase	gcvP	gcvP	Glycine breakdown	Energy Metabolism	Soluble proteins	0.88027592	107.3	0.0
BLAST Output	PCC 11901 Accession	Percentage Identity	Alignment Length	Mismatches	Gap Open	Synechocystis sp. PCC 6803 Start	Synechocystis sp. PCC 6803 End	PCC 11901 Start	PCC 11901 End	E-value	Bit Score
sp|P74416|GCSP_SYNY3	WP_168191148.1	68.163	958	295	5	28	982	13	963	0.0	1341
sll0171	P54261	probable aminomethyltransferase	gcvT	gcvT	Glycine breakdown	Energy Metabolism	Soluble proteins	0.773014191	41.0	0.0
BLAST Output	PCC 11901 Accession	Percentage Identity	Alignment Length	Mismatches	Gap Open	Synechocystis sp. PCC 6803 Start	Synechocystis sp. PCC 6803 End	PCC 11901 Start	PCC 11901 End	E-value	Bit Score
sp|P54261|GCST_SYNY3	WP_138073401.1	59.890	364	139	3	9	370	5	363	3.47e-155	437
sp|P54261|GCST_SYNY3	WP_138072978.1	27.793	367	230	10	10	364	6	349	7.07e-27	106
sp|P54261|GCST_SYNY3	WP_041443616.1	38.710	31	19	0	79	109	30	60	0.74	26.9
slr1096	P72740	dihydrolipoamide dehydrogenase	pdhD	phdD, lpd, pdhD	Pyruvate dehydrogenase	Energy Metabolism	Soluble proteins	0.836060072	50.8	0.0
BLAST Output	PCC 11901 Accession	Percentage Identity	Alignment Length	Mismatches	Gap Open	Synechocystis sp. PCC 6803 Start	Synechocystis sp. PCC 6803 End	PCC 11901 Start	PCC 11901 End	E-value	Bit Score
sp|P72740|DLDH_SYNY3	WP_138073081.1	80.810	469	90	0	5	473	6	474	0.0	768
sp|P72740|DLDH_SYNY3	WP_138073175.1	31.712	473	279	15	6	465	4	445	5.19e-52	179
sp|P72740|DLDH_SYNY3	WP_138073182.1	22.667	450	278	17	6	450	15	399	4.55e-05	42.0
sp|P72740|DLDH_SYNY3	WP_138072806.1	46.667	30	16	0	7	36	16	45	0.012	34.3
sp|P72740|DLDH_SYNY3	WP_138073605.1	25.112	223	139	10	180	392	154	358	0.019	33.5
sp|P72740|DLDH_SYNY3	WP_138072945.1	30.000	80	46	3	4	73	7	86	0.20	30.4
sp|P72740|DLDH_SYNY3	WP_138073777.1	33.333	54	32	1	180	233	3	52	0.21	30.0
sp|P72740|DLDH_SYNY3	WP_138073622.1	32.308	65	33	3	220	284	65	118	0.26	29.3
sp|P72740|DLDH_SYNY3	WP_138071796.1	25.581	86	56	2	242	323	205	286	0.86	28.5
sll1931	P77962	serine hydroxymethyltransferase	shm	glyA, shm	Glycolate metabolism	Energy Metabolism	Soluble proteins	0.906543281	46.2	0.0
BLAST Output	PCC 11901 Accession	Percentage Identity	Alignment Length	Mismatches	Gap Open	Synechocystis sp. PCC 6803 Start	Synechocystis sp. PCC 6803 End	PCC 11901 Start	PCC 11901 End	E-value	Bit Score
sp|P77962|GLYA_SYNY3	WP_065711720.1	81.030	427	81	0	1	427	1	427	0.0	726
sll1908	P73821	D-3-phosphoglycerate dehydrogenase	hpr	serA	Unknown Proteins	Unknown Proteins	Soluble proteins	0.941777069	56.2	0.0
BLAST Output	PCC 11901 Accession	Percentage Identity	Alignment Length	Mismatches	Gap Open	Synechocystis sp. PCC 6803 Start	Synechocystis sp. PCC 6803 End	PCC 11901 Start	PCC 11901 End	E-value	Bit Score
sp|P73821|SERA_SYNY3	WP_012306867.1	78.137	526	114	1	29	554	1	525	0.0	855
sp|P73821|SERA_SYNY3	WP_138073864.1	33.206	262	154	5	81	326	60	316	1.27e-40	146
sp|P73821|SERA_SYNY3	WP_030006628.1	34.091	44	28	1	472	514	345	388	0.016	34.3
slr1556	P74586	2-hydroxyacid dehydrogenase homolog	hpr	ddh	Fermentation	Photosynthesis & Respiration	Soluble proteins	0.902640735	36.8	0.0
BLAST Output	PCC 11901 Accession	Percentage Identity	Alignment Length	Mismatches	Gap Open	Synechocystis sp. PCC 6803 Start	Synechocystis sp. PCC 6803 End	PCC 11901 Start	PCC 11901 End	E-value	Bit Score
tr|P74586|P74586_SYNY3	WP_138073864.1	62.048	332	124	2	1	332	1	330	3.86e-146	412
tr|P74586|P74586_SYNY3	WP_012306867.1	30.597	268	172	2	65	332	60	313	1.41e-35	132
tr|P74586|P74586_SYNY3	WP_138073081.1	32.000	50	28	1	129	178	169	212	0.19	30.0
tr|P74586|P74586_SYNY3	WP_012305858.1	27.612	134	78	6	146	265	5	133	0.57	28.5
slr1840	P73408	hypothetical protein	glyK	SynGK	Random proteins (Hypothetical)	Random proteins (Hypothetical)	Soluble proteins	0.749708433	39.2	0.0
No hits
sll1981	P73918	acetolactate synthase	gcl	ilvB, gcl, alsS, 2-OGDC	TCA cycle	Energy Metabolism	Soluble proteins	0.918360042	60.1	0.0
BLAST Output	PCC 11901 Accession	Percentage Identity	Alignment Length	Mismatches	Gap Open	Synechocystis sp. PCC 6803 Start	Synechocystis sp. PCC 6803 End	PCC 11901 Start	PCC 11901 End	E-value	Bit Score
tr|P73918|P73918_SYNY3	WP_030007761.1	79.817	545	110	0	4	548	1	545	0.0	933
tr|P73918|P73918_SYNY3	WP_138071857.1	31.444	547	354	7	7	534	22	566	1.68e-85	273
tr|P73918|P73918_SYNY3	WP_138073309.1	23.926	163	116	2	7	161	13	175	9.54e-08	51.2
tr|P73918|P73918_SYNY3	WP_030008261.1	29.310	58	40	1	93	149	33	90	0.038	31.6
slr2088	P73913	acetohydroxy acid synthase	gcl	ilvG, gcl	Isoleucine, valine, leucine biosynthesis	Amino acid biosynthesis	Soluble proteins	1.0	67.7	0.0
BLAST Output	PCC 11901 Accession	Percentage Identity	Alignment Length	Mismatches	Gap Open	Synechocystis sp. PCC 6803 Start	Synechocystis sp. PCC 6803 End	PCC 11901 Start	PCC 11901 End	E-value	Bit Score
tr|P73913|P73913_SYNY3	WP_138071857.1	73.951	572	149	0	16	587	14	585	0.0	898
tr|P73913|P73913_SYNY3	WP_030007761.1	32.787	549	344	10	24	568	4	531	4.30e-88	281
tr|P73913|P73913_SYNY3	WP_138073309.1	27.083	96	67	1	26	121	15	107	2.49e-05	43.5
tr|P73913|P73913_SYNY3	WP_138073724.1	36.000	25	16	0	376	400	159	183	0.43	29.3
tr|P73913|P73913_SYNY3	WP_138071756.1	44.000	25	14	0	597	621	1	25	0.61	29.3
slr0229	Q55702	3-hydroxyisobutyrate dehydrogenase	tsr	mmsB, tsr	Unknown Proteins	Unknown Proteins	Unknown	0.507944143	29.9	0.0
BLAST Output	PCC 11901 Accession	Percentage Identity	Alignment Length	Mismatches	Gap Open	Synechocystis sp. PCC 6803 Start	Synechocystis sp. PCC 6803 End	PCC 11901 Start	PCC 11901 End	E-value	Bit Score
sp|Q55702|Y229_SYNY3	WP_138073324.1	55.282	284	126	1	5	287	4	287	1.73e-111	320
sp|Q55702|Y229_SYNY3	WP_138071877.1	30.888	259	157	6	5	254	2	247	2.18e-31	115
sp|Q55702|Y229_SYNY3	WP_012305858.1	27.461	193	120	6	1	179	1	187	3.80e-09	53.5
sll1358	P73510	putative oxalate decarboxylase, periplasmic protein	odc	mncA	Random proteins (Hypothetical)	Random proteins (Hypothetical)	Soluble proteins	0.902329303	43.1	0.0
BLAST Output	PCC 11901 Accession	Percentage Identity	Alignment Length	Mismatches	Gap Open	Synechocystis sp. PCC 6803 Start	Synechocystis sp. PCC 6803 End	PCC 11901 Start	PCC 11901 End	E-value	Bit Score
tr|P73510|P73510_SYNY3	WP_138073202.1	32.895	76	39	3	123	192	302	371	0.13	30.8
Synthesis of Carbon Storage Compounds
slr1176	P52415	glucose-1-phosphate adenylyltransferase	glgC	glgC, agp	Glycogen biosynthesis	Central Intermediary Metabolism	Soluble proteins	0.899238289	49.3	0.0
BLAST Output	PCC 11901 Accession	Percentage Identity	Alignment Length	Mismatches	Gap Open	Synechocystis sp. PCC 6803 Start	Synechocystis sp. PCC 6803 End	PCC 11901 Start	PCC 11901 End	E-value	Bit Score
sp|P52415|GLGC_SYNY3	WP_062431685.1	78.089	429	94	0	11	439	1	429	0.0	689
sp|P52415|GLGC_SYNY3	WP_012306577.1	26.571	350	195	13	16	358	3	297	7.54e-21	92.0
sp|P52415|GLGC_SYNY3	WP_030006585.1	24.064	374	214	13	16	356	3	339	2.90e-15	73.6
sp|P52415|GLGC_SYNY3	WP_062436083.1	21.818	440	242	20	14	437	2	355	0.004	35.8
sll0945	P74521	glycogen synthase	glgA1	glgA, glgA1, glnA1	Glycogen biosynthesis	Central Intermediary Metabolism	Soluble proteins	0.92710852	54.3	0.0
BLAST Output	PCC 11901 Accession	Percentage Identity	Alignment Length	Mismatches	Gap Open	Synechocystis sp. PCC 6803 Start	Synechocystis sp. PCC 6803 End	PCC 11901 Start	PCC 11901 End	E-value	Bit Score
sp|P74521|GLGA1_SYNY3	WP_030008132.1	70.798	476	139	0	1	476	1	476	0.0	750
sp|P74521|GLGA1_SYNY3	WP_062435226.1	32.929	495	280	16	1	452	1	486	3.33e-65	215
sp|P74521|GLGA1_SYNY3	WP_138071472.1	23.529	255	159	7	210	462	156	376	2.03e-05	43.1
sp|P74521|GLGA1_SYNY3	WP_138073295.1	25.000	152	106	4	285	429	202	352	5.81e-05	41.6
sp|P74521|GLGA1_SYNY3	WP_065710775.1	23.797	395	223	18	1	387	1	325	4.03e-04	38.9
sp|P74521|GLGA1_SYNY3	WP_138073291.1	23.750	160	111	4	275	433	211	360	4.81e-04	38.9
sp|P74521|GLGA1_SYNY3	WP_138072899.1	24.615	130	83	4	350	476	350	467	0.002	37.4
sp|P74521|GLGA1_SYNY3	WP_138071062.1	26.119	134	76	4	260	382	246	367	0.002	36.6
sp|P74521|GLGA1_SYNY3	WP_138071066.1	30.233	86	58	1	299	382	213	298	0.009	34.7
sp|P74521|GLGA1_SYNY3	WP_138073301.1	22.321	112	76	4	270	376	182	287	0.009	34.7
sp|P74521|GLGA1_SYNY3	WP_138073806.1	26.230	122	75	4	267	380	203	317	0.014	33.9
sp|P74521|GLGA1_SYNY3	WP_138073302.1	27.778	126	76	5	269	386	223	341	0.23	30.0
sp|P74521|GLGA1_SYNY3	WP_168191169.1	40.000	40	23	1	337	376	305	343	0.92	28.1
sll1393	P72623	glycogen (starch) synthase	glgA2	glgA, glg2, glgA2, glnA2	Glycogen biosynthesis	Central Intermediary Metabolism	Unknown	0.665221247	56.2	0.0
BLAST Output	PCC 11901 Accession	Percentage Identity	Alignment Length	Mismatches	Gap Open	Synechocystis sp. PCC 6803 Start	Synechocystis sp. PCC 6803 End	PCC 11901 Start	PCC 11901 End	E-value	Bit Score
sp|P72623|GLGA2_SYNY3	WP_062435226.1	71.283	491	140	1	1	491	1	490	0.0	764
sp|P72623|GLGA2_SYNY3	WP_030008132.1	30.677	502	283	17	1	487	1	452	2.49e-65	215
sp|P72623|GLGA2_SYNY3	WP_138073295.1	24.000	75	45	1	366	440	255	317	0.007	35.0
sp|P72623|GLGA2_SYNY3	WP_065710775.1	24.113	141	87	5	284	416	196	324	0.014	34.3
sp|P72623|GLGA2_SYNY3	WP_138071476.1	32.075	53	34	1	275	327	70	120	0.24	30.4
sp|P72623|GLGA2_SYNY3	WP_138073290.1	24.545	110	77	4	303	409	193	299	0.38	29.6
sll0158	P52981	1,4-alpha-glucan branching enzyme	glgB	glgB	Glycogen biosynthesis	Central Intermediary Metabolism	Soluble proteins	0.906067677	89.5	0.0
BLAST Output	PCC 11901 Accession	Percentage Identity	Alignment Length	Mismatches	Gap Open	Synechocystis sp. PCC 6803 Start	Synechocystis sp. PCC 6803 End	PCC 11901 Start	PCC 11901 End	E-value	Bit Score
sp|P52981|GLGB_SYNY3	WP_138073499.1	70.795	767	223	1	1	766	1	767	0.0	1169
sp|P52981|GLGB_SYNY3	WP_138072893.1	28.986	69	48	1	301	368	116	184	0.005	36.6
sp|P52981|GLGB_SYNY3	WP_138071589.1	25.253	99	61	3	477	565	595	690	0.94	29.3
slr1857	P73608	isoamylase	glgX1	glgX, slr1857, slr1875	Glycogen biosynthesis	Central Intermediary Metabolism	Soluble proteins	0.912506084	79.8	0.0
BLAST Output	PCC 11901 Accession	Percentage Identity	Alignment Length	Mismatches	Gap Open	Synechocystis sp. PCC 6803 Start	Synechocystis sp. PCC 6803 End	PCC 11901 Start	PCC 11901 End	E-value	Bit Score
tr|P73608|P73608_SYNY3	WP_138073499.1	26.102	295	158	16	85	359	189	443	2.54e-09	57.0
tr|P73608|P73608_SYNY3	WP_138072893.1	23.413	504	262	26	192	604	115	585	2.35e-05	43.9
tr|P73608|P73608_SYNY3	WP_138073432.1	30.769	39	27	0	397	435	140	178	0.76	29.3
slr0237	P72691	glycogen operon protein GlgX homolog	glgX2	glgX	Glycogen biosynthesis	Central Intermediary Metabolism	Soluble proteins	0.901338552	83.4	0.0
BLAST Output	PCC 11901 Accession	Percentage Identity	Alignment Length	Mismatches	Gap Open	Synechocystis sp. PCC 6803 Start	Synechocystis sp. PCC 6803 End	PCC 11901 Start	PCC 11901 End	E-value	Bit Score
tr|P72691|P72691_SYNY3	WP_138073499.1	23.438	320	174	13	63	356	169	443	1.48e-12	67.4
tr|P72691|P72691_SYNY3	WP_138072893.1	22.222	90	57	3	194	283	114	190	0.100	32.3
tr|P72691|P72691_SYNY3	WP_012308010.1	24.242	66	41	2	235	297	132	191	0.89	28.9
sll1356	P73511	glycogen phosphorylase	glgP1	glgP, glgY, glgP1	Glycogen biosynthesis	Central Intermediary Metabolism	Soluble proteins	0.907318263	96.6	0.0
BLAST Output	PCC 11901 Accession	Percentage Identity	Alignment Length	Mismatches	Gap Open	Synechocystis sp. PCC 6803 Start	Synechocystis sp. PCC 6803 End	PCC 11901 Start	PCC 11901 End	E-value	Bit Score
sp|P73511|PHSG_SYNY3	WP_138072456.1	59.927	826	326	2	13	833	16	841	0.0	1014
sp|P73511|PHSG_SYNY3	WP_012307740.1	23.986	592	324	22	135	693	126	624	1.73e-21	96.7
sp|P73511|PHSG_SYNY3	WP_138072513.1	24.324	111	77	3	677	781	245	354	0.059	33.1
slr1367	P73546	glycogen phosphorylase	glgP2	glgP, glgY, glgP2, slr1367	Glycogen biosynthesis	Central Intermediary Metabolism	Soluble proteins	0.913243729	98.2	0.0
BLAST Output	PCC 11901 Accession	Percentage Identity	Alignment Length	Mismatches	Gap Open	Synechocystis sp. PCC 6803 Start	Synechocystis sp. PCC 6803 End	PCC 11901 Start	PCC 11901 End	E-value	Bit Score
tr|P73546|P73546_SYNY3	WP_138072456.1	66.310	840	278	2	11	845	2	841	0.0	1143
tr|P73546|P73546_SYNY3	WP_012307740.1	24.196	591	324	22	147	705	126	624	3.09e-19	89.4
tr|P73546|P73546_SYNY3	WP_138071988.1	21.970	132	98	5	725	854	18	146	0.51	30.0
slr1993	P73825	PHA-specific beta-ketothiolase	phaA	phaA, thl, thi	PHB biosynthesis	Fatty acid, phospholipid and sterol metabolism	Soluble proteins	0.900239355	43.3	0.0
BLAST Output	PCC 11901 Accession	Percentage Identity	Alignment Length	Mismatches	Gap Open	Synechocystis sp. PCC 6803 Start	Synechocystis sp. PCC 6803 End	PCC 11901 Start	PCC 11901 End	E-value	Bit Score
sp|P73825|THIL_SYNY3	WP_138070980.1	25.175	143	88	5	11	136	383	523	0.023	33.1
sp|P73825|THIL_SYNY3	WP_138071077.1	25.175	143	88	5	11	136	383	523	0.025	33.1
slr1994	P73826	PHA-specific acetoacetyl-CoA reductase	phaB	phaB, fabG2, fabG, slr1994	PHB biosynthesis	Fatty acid, phospholipid and sterol metabolism	Soluble proteins	0.908099127	25.3	0.0
BLAST Output	PCC 11901 Accession	Percentage Identity	Alignment Length	Mismatches	Gap Open	Synechocystis sp. PCC 6803 Start	Synechocystis sp. PCC 6803 End	PCC 11901 Start	PCC 11901 End	E-value	Bit Score
sp|P73826|PHAB_SYNY3	WP_138071343.1	38.525	244	132	3	6	236	11	249	5.67e-48	155
sp|P73826|PHAB_SYNY3	WP_138073537.1	26.702	191	115	2	12	182	5	190	1.51e-12	62.0
sp|P73826|PHAB_SYNY3	WP_012305942.1	24.206	252	159	11	6	239	1	238	1.45e-09	53.1
sp|P73826|PHAB_SYNY3	WP_138071622.1	27.119	177	119	4	9	177	410	584	1.17e-07	48.5
sp|P73826|PHAB_SYNY3	WP_012307288.1	24.335	263	164	9	1	238	1	253	1.49e-05	41.6
sp|P73826|PHAB_SYNY3	WP_138073101.1	22.360	161	109	4	12	165	1780	1931	0.032	32.0
sp|P73826|PHAB_SYNY3	WP_138072043.1	27.513	189	120	9	12	191	5	185	0.069	30.0
slr1830	P73390	poly(3-hydroxyalkanoate) synthase	phaC	phaC, phbC, slr1830	PHB biosynthesis	Fatty acid, phospholipid and sterol metabolism	Unknown	0.289456284	42.9	0.0
BLAST Output	PCC 11901 Accession	Percentage Identity	Alignment Length	Mismatches	Gap Open	Synechocystis sp. PCC 6803 Start	Synechocystis sp. PCC 6803 End	PCC 11901 Start	PCC 11901 End	E-value	Bit Score
sp|P73390|PHAC_SYNY3	WP_138073319.1	29.060	117	68	5	71	186	21	123	0.001	36.6
sp|P73390|PHAC_SYNY3	WP_138073338.1	25.620	121	70	6	78	189	28	137	0.49	28.5
sp|P73390|PHAC_SYNY3	WP_138073171.1	28.986	69	37	2	122	187	36	95	0.51	28.5
slr1829	P73389	putative poly(3-hydroxyalkanoate) synthase component	phaE	phaE, slr1829, phaC	PHB biosynthesis	Fatty acid, phospholipid and sterol metabolism	Unknown	0.288174542	38.0	0.0
BLAST Output	PCC 11901 Accession	Percentage Identity	Alignment Length	Mismatches	Gap Open	Synechocystis sp. PCC 6803 Start	Synechocystis sp. PCC 6803 End	PCC 11901 Start	PCC 11901 End	E-value	Bit Score
sp|P73389|PHAE_SYNY3	WP_138073668.1	29.091	55	39	0	69	123	278	332	0.24	29.6
sp|P73389|PHAE_SYNY3	WP_138070978.1	29.091	55	39	0	69	123	278	332	0.25	29.6
sp|P73389|PHAE_SYNY3	WP_138071019.1	29.091	55	39	0	69	123	278	332	0.26	29.3
Tricarboxylic Acid Cycle
sll0401	Q59977	citrate synthase	gltA	gltA, gluT	TCA cycle	Energy Metabolism	Soluble proteins	0.927605494	44.4	0.0
BLAST Output	PCC 11901 Accession	Percentage Identity	Alignment Length	Mismatches	Gap Open	Synechocystis sp. PCC 6803 Start	Synechocystis sp. PCC 6803 End	PCC 11901 Start	PCC 11901 End	E-value	Bit Score
sp|Q59977|CISY_SYNY3	WP_012308218.1	76.517	379	89	0	5	383	1	379	0.0	611
sp|Q59977|CISY_SYNY3	WP_138072677.1	28.283	99	65	3	202	300	27	119	0.14	30.4
slr0665	P74582	aconitate hydratase	acnB	acnB	TCA cycle	Energy Metabolism	Soluble proteins	1.0	93.5	0.0
BLAST Output	PCC 11901 Accession	Percentage Identity	Alignment Length	Mismatches	Gap Open	Synechocystis sp. PCC 6803 Start	Synechocystis sp. PCC 6803 End	PCC 11901 Start	PCC 11901 End	E-value	Bit Score
sp|P74582|ACNB_SYNY3	WP_138073389.1	89.286	868	93	0	1	868	1	868	0.0	1614
sp|P74582|ACNB_SYNY3	WP_138073201.1	24.352	386	227	14	465	812	105	463	4.26e-11	62.4
slr1289	P80046	isocitrate dehydrogenase (NADP+)	icd	icd, icdA	TCA cycle	Energy Metabolism	Soluble proteins	1.0	52.2	0.0
BLAST Output	PCC 11901 Accession	Percentage Identity	Alignment Length	Mismatches	Gap Open	Synechocystis sp. PCC 6803 Start	Synechocystis sp. PCC 6803 End	PCC 11901 Start	PCC 11901 End	E-value	Bit Score
sp|P80046|IDH_SYNY3	WP_012307950.1	41.000	100	57	2	338	435	226	325	3.69e-15	73.2
sll1981	P73918	acetolactate synthase	gcl	ilvB, gcl, alsS, 2-OGDC	TCA cycle	Energy Metabolism	Soluble proteins	0.918360042	60.1	0.0
BLAST Output	PCC 11901 Accession	Percentage Identity	Alignment Length	Mismatches	Gap Open	Synechocystis sp. PCC 6803 Start	Synechocystis sp. PCC 6803 End	PCC 11901 Start	PCC 11901 End	E-value	Bit Score
tr|P73918|P73918_SYNY3	WP_030007761.1	79.817	545	110	0	4	548	1	545	0.0	933
tr|P73918|P73918_SYNY3	WP_138071857.1	31.444	547	354	7	7	534	22	566	1.68e-85	273
tr|P73918|P73918_SYNY3	WP_138073309.1	23.926	163	116	2	7	161	13	175	9.54e-08	51.2
tr|P73918|P73918_SYNY3	WP_030008261.1	29.310	58	40	1	93	149	33	90	0.038	31.6
slr0370	Q55585	succinate-semialdehyde dehydrogenase (NADP+)	SSADH	gabD, SSADH	TCA cycle	Energy Metabolism	Soluble proteins	0.874490417	48.7	0.0
BLAST Output	PCC 11901 Accession	Percentage Identity	Alignment Length	Mismatches	Gap Open	Synechocystis sp. PCC 6803 Start	Synechocystis sp. PCC 6803 End	PCC 11901 Start	PCC 11901 End	E-value	Bit Score
sp|Q55585|GABD_SYNY3	WP_138071828.1	61.810	453	173	0	1	453	1	453	0.0	587
sp|Q55585|GABD_SYNY3	WP_168191138.1	32.319	427	256	9	39	438	559	979	1.03e-55	196
sp|Q55585|GABD_SYNY3	WP_138073374.1	40.909	22	13	0	129	150	83	104	0.60	27.3
sp|Q55585|GABD_SYNY3	WP_138071365.1	36.170	47	27	1	288	334	17	60	0.63	28.9
sp|Q55585|GABD_SYNY3	WP_138071658.1	23.034	178	118	6	121	291	118	283	0.87	28.1
slr1233	P73479	succinate dehydrogenase flavoprotein subunit	sdhA	frdA, sdhA	Succinate dehydrogenase	Energy Metabolism	Soluble proteins	0.92599936	63.7	0.0
BLAST Output	PCC 11901 Accession	Percentage Identity	Alignment Length	Mismatches	Gap Open	Synechocystis sp. PCC 6803 Start	Synechocystis sp. PCC 6803 End	PCC 11901 Start	PCC 11901 End	E-value	Bit Score
tr|P73479|P73479_SYNY3	WP_138071585.1	77.739	575	128	0	1	575	1	575	0.0	952
tr|P73479|P73479_SYNY3	WP_138072242.1	35.957	559	291	21	5	537	12	529	2.53e-82	265
tr|P73479|P73479_SYNY3	WP_138071218.1	40.909	44	24	2	157	199	259	301	0.83	28.9
tr|P73479|P73479_SYNY3	WP_138072699.1	28.000	75	44	3	189	256	149	220	0.83	28.5
tr|P73479|P73479_SYNY3	WP_138072945.1	52.174	23	11	0	3	25	11	33	0.98	28.5
sll1625	P73723	succinate dehydrogenase iron- sulphur protein subunit	sdhB1	sdhB	Succinate dehydrogenase	Energy Metabolism	Soluble proteins	0.917513521	36.8	0.0
BLAST Output	PCC 11901 Accession	Percentage Identity	Alignment Length	Mismatches	Gap Open	Synechocystis sp. PCC 6803 Start	Synechocystis sp. PCC 6803 End	PCC 11901 Start	PCC 11901 End	E-value	Bit Score
tr|P73723|P73723_SYNY3	WP_138072968.1	57.273	330	133	4	1	327	1	325	1.83e-138	392
tr|P73723|P73723_SYNY3	WP_138073249.1	26.761	71	47	2	154	222	690	757	0.54	28.5
tr|P73723|P73723_SYNY3	WP_138073312.1	26.667	60	38	1	207	266	274	327	0.56	28.5
tr|P73723|P73723_SYNY3	WP_138073389.1	28.814	59	40	1	18	74	523	581	0.70	28.1
sll0823	Q55431	probable succinate dehydrogenase iron-sulfur protein	sdhB2	sdhB, sll0823	Succinate dehydrogenase	Energy Metabolism	Unknown	0.646269621	27.3	0.0
BLAST Output	PCC 11901 Accession	Percentage Identity	Alignment Length	Mismatches	Gap Open	Synechocystis sp. PCC 6803 Start	Synechocystis sp. PCC 6803 End	PCC 11901 Start	PCC 11901 End	E-value	Bit Score
tr|Q55431|Q55431_SYNY3	WP_138072968.1	50.661	227	110	1	20	244	21	247	2.16e-77	233
tr|Q55431|Q55431_SYNY3	WP_138073334.1	27.381	84	51	3	142	225	17	90	0.034	31.6
tr|Q55431|Q55431_SYNY3	WP_138072148.1	28.000	75	41	2	150	224	144	205	0.40	28.1
tr|Q55431|Q55431_SYNY3	WP_030007006.1	26.667	60	30	1	57	102	22	81	0.76	26.6
sll1023	P72927	succinyl-CoA synthetase beta chain	sucC	sucC	Succinyl-CoA synthetase	Energy Metabolism	Soluble proteins	0.941197841	44.0	0.0
BLAST Output	PCC 11901 Accession	Percentage Identity	Alignment Length	Mismatches	Gap Open	Synechocystis sp. PCC 6803 Start	Synechocystis sp. PCC 6803 End	PCC 11901 Start	PCC 11901 End	E-value	Bit Score
tr|P72927|P72927_SYNY3	WP_138072903.1	43.032	409	189	10	1	391	1	383	1.39e-88	270
tr|P72927|P72927_SYNY3	WP_138072901.1	27.397	73	51	2	221	293	133	203	0.020	33.1
sll1557	P74286	succinyl-CoA synthetase alpha chain	sucD	sucD	Succinyl-CoA synthetase	Energy Metabolism	Soluble proteins	1.0	32.2	0.0
BLAST Output	PCC 11901 Accession	Percentage Identity	Alignment Length	Mismatches	Gap Open	Synechocystis sp. PCC 6803 Start	Synechocystis sp. PCC 6803 End	PCC 11901 Start	PCC 11901 End	E-value	Bit Score
tr|P74286|P74286_SYNY3	WP_138072901.1	43.390	295	167	0	1	295	1	295	1.66e-71	220
tr|P74286|P74286_SYNY3	WP_138073549.1	25.140	179	123	4	65	236	88	262	5.67e-04	37.7
slr0018	Q55674	fumarase	fumC	fumC	TCA cycle	Energy Metabolism	Soluble proteins	0.87306534	49.7	0.0
BLAST Output	PCC 11901 Accession	Percentage Identity	Alignment Length	Mismatches	Gap Open	Synechocystis sp. PCC 6803 Start	Synechocystis sp. PCC 6803 End	PCC 11901 Start	PCC 11901 End	E-value	Bit Score
sp|Q55674|FUMC_SYNY3	WP_138073564.1	43.421	456	256	2	6	460	6	460	1.75e-127	375
sp|Q55674|FUMC_SYNY3	WP_012308248.1	24.883	213	146	6	134	344	87	287	3.22e-08	52.0
sp|Q55674|FUMC_SYNY3	WP_138073500.1	24.324	74	54	1	357	428	93	166	0.053	32.0
sp|Q55674|FUMC_SYNY3	WP_062431512.1	40.000	40	22	1	28	65	259	298	0.64	28.9
sll0891	Q55383	malate dehydrogenase	citH	citH, ldh, mdh	TCA cycle	Energy Metabolism	Soluble proteins	1.0	34.3	0.0
BLAST Output	PCC 11901 Accession	Percentage Identity	Alignment Length	Mismatches	Gap Open	Synechocystis sp. PCC 6803 Start	Synechocystis sp. PCC 6803 End	PCC 11901 Start	PCC 11901 End	E-value	Bit Score
sp|Q55383|MDH_SYNY3	WP_138073589.1	64.968	314	110	0	9	322	9	322	3.06e-151	424
sp|Q55383|MDH_SYNY3	WP_138072935.1	35.000	40	26	0	9	48	109	148	0.77	27.7
sp|Q55383|MDH_SYNY3	WP_138073674.1	44.444	27	15	0	291	317	527	553	0.80	28.1
Alternate pathways linking the TCA cycle, photorespiration and glycolysis
sll0920	P74299	phosphoenolpyruvate carboxylase	pepC	ppc	Pyruvate and acetyl-CoA metabolism	Energy Metabolism	Soluble proteins	0.781966249	118.9	0.0
BLAST Output	PCC 11901 Accession	Percentage Identity	Alignment Length	Mismatches	Gap Open	Synechocystis sp. PCC 6803 Start	Synechocystis sp. PCC 6803 End	PCC 11901 Start	PCC 11901 End	E-value	Bit Score
sp|P74299|CAPP_SYNY3	WP_138073231.1	63.439	1012	338	6	23	1034	16	995	0.0	1236
sp|P74299|CAPP_SYNY3	WP_138072895.1	37.931	58	35	1	282	339	8	64	0.41	30.4
slr0721	P72661	malic enzyme	ME	me	Pyruvate and acetyl-CoA metabolism	Energy Metabolism	Soluble proteins	0.9272993	48.7	0.0
BLAST Output	PCC 11901 Accession	Percentage Identity	Alignment Length	Mismatches	Gap Open	Synechocystis sp. PCC 6803 Start	Synechocystis sp. PCC 6803 End	PCC 11901 Start	PCC 11901 End	E-value	Bit Score
tr|P72661|P72661_SYNY3	WP_138072418.1	73.536	461	122	0	1	461	1	461	0.0	667
tr|P72661|P72661_SYNY3	WP_030006437.1	37.838	37	22	1	264	300	1	36	0.59	28.9
Fermentation
slr1556	P74586	2-hydroxyacid dehydrogenase homolog	hpr	ddh	Fermentation	Photosynthesis & Respiration	Soluble proteins	0.902640735	36.8	0.0
BLAST Output	PCC 11901 Accession	Percentage Identity	Alignment Length	Mismatches	Gap Open	Synechocystis sp. PCC 6803 Start	Synechocystis sp. PCC 6803 End	PCC 11901 Start	PCC 11901 End	E-value	Bit Score
tr|P74586|P74586_SYNY3	WP_138073864.1	62.048	332	124	2	1	332	1	330	3.86e-146	412
tr|P74586|P74586_SYNY3	WP_012306867.1	30.597	268	172	2	65	332	60	313	1.41e-35	132
tr|P74586|P74586_SYNY3	WP_138073081.1	32.000	50	28	1	129	178	169	212	0.19	30.0
tr|P74586|P74586_SYNY3	WP_012305858.1	27.612	134	78	6	146	265	5	133	0.57	28.5
slr2132	P73662	phosphotransacetylase	pta	pta	Fermentation	Photosynthesis & Respiration	Soluble proteins	0.904415267	76.4	0.0
BLAST Output	PCC 11901 Accession	Percentage Identity	Alignment Length	Mismatches	Gap Open	Synechocystis sp. PCC 6803 Start	Synechocystis sp. PCC 6803 End	PCC 11901 Start	PCC 11901 End	E-value	Bit Score
sp|P73662|PTA_SYNY3	WP_138072749.1	27.717	368	238	10	2	359	5	354	2.85e-24	101
sll1299	P73162	acetate kinase	ack	ackA	Fermentation	Photosynthesis & Respiration	Soluble proteins	0.896448143	44.7	0.0
BLAST Output	PCC 11901 Accession	Percentage Identity	Alignment Length	Mismatches	Gap Open	Synechocystis sp. PCC 6803 Start	Synechocystis sp. PCC 6803 End	PCC 11901 Start	PCC 11901 End	E-value	Bit Score
sp|P73162|ACKA_SYNY3	WP_138071636.1	33.333	69	44	1	117	183	238	306	0.062	32.0
sll0542	Q55404	acetyl-coenzyme A synthetase	acs	acs	Pyruvate and acetyl-CoA metabolism	Energy Metabolism	Soluble proteins	0.922952226	73.0	0.0
BLAST Output	PCC 11901 Accession	Percentage Identity	Alignment Length	Mismatches	Gap Open	Synechocystis sp. PCC 6803 Start	Synechocystis sp. PCC 6803 End	PCC 11901 Start	PCC 11901 End	E-value	Bit Score
sp|Q55404|ACSA_SYNY3	WP_138073484.1	77.658	649	144	1	4	651	5	653	0.0	1093
sp|Q55404|ACSA_SYNY3	WP_138073101.1	24.020	587	340	28	96	627	21	556	5.43e-08	52.8
sp|Q55404|ACSA_SYNY3	WP_138073536.1	28.409	176	103	5	114	284	37	194	1.34e-07	50.8
sp|Q55404|ACSA_SYNY3	WP_138073536.1	27.200	125	68	4	516	626	447	562	0.92	28.9
sp|Q55404|ACSA_SYNY3	WP_138072683.1	26.432	227	140	6	114	333	40	246	2.51e-07	50.1
sp|Q55404|ACSA_SYNY3	WP_138073147.1	28.947	114	76	2	515	628	271	379	3.30e-07	49.3
sp|Q55404|ACSA_SYNY3	WP_138073538.1	24.499	449	235	20	256	647	165	566	8.23e-05	42.4
sp|Q55404|ACSA_SYNY3	WP_138071968.1	26.087	92	65	2	132	222	72	161	0.81	28.9
Chorismate Biosynthesis
slr2130	P73997	3-dehydroquinate synthase	aroB	aroB	Chorismate biosynthesis	Amino acid biosynthesis	Soluble proteins	0.910532064	38.8	0.0
BLAST Output	PCC 11901 Accession	Percentage Identity	Alignment Length	Mismatches	Gap Open	Synechocystis sp. PCC 6803 Start	Synechocystis sp. PCC 6803 End	PCC 11901 Start	PCC 11901 End	E-value	Bit Score
sp|P73997|AROB_SYNY3	WP_138073091.1	63.056	360	133	0	1	360	1	360	5.21e-164	459
sp|P73997|AROB_SYNY3	WP_138072597.1	24.803	254	159	10	81	315	83	323	0.005	35.0
sp|P73997|AROB_SYNY3	WP_138072716.1	22.727	132	81	4	103	218	356	482	0.021	33.1
sp|P73997|AROB_SYNY3	WP_138071335.1	33.962	53	28	1	20	65	235	287	0.70	28.1
sll1112	P73367	3-dehydroquinate dehydratase	aroQ	aroQ	Chorismate biosynthesis	Amino acid biosynthesis	Soluble proteins	0.714306444	16.4	0.0
BLAST Output	PCC 11901 Accession	Percentage Identity	Alignment Length	Mismatches	Gap Open	Synechocystis sp. PCC 6803 Start	Synechocystis sp. PCC 6803 End	PCC 11901 Start	PCC 11901 End	E-value	Bit Score
sp|P73367|AROQ_SYNY3	WP_168191107.1	63.265	147	54	0	3	149	2	148	5.96e-65	192
sp|P73367|AROQ_SYNY3	WP_138073604.1	29.412	68	46	2	77	142	498	565	0.61	26.6
slr1559	P74591	shikimate 5-dehydrogenase	aroE	aroE	Chorismate biosynthesis	Amino acid biosynthesis	Soluble proteins	0.876865165	31.1	0.0
BLAST Output	PCC 11901 Accession	Percentage Identity	Alignment Length	Mismatches	Gap Open	Synechocystis sp. PCC 6803 Start	Synechocystis sp. PCC 6803 End	PCC 11901 Start	PCC 11901 End	E-value	Bit Score
sp|P74591|AROE_SYNY3	WP_138073419.1	58.392	286	119	0	3	288	2	287	2.60e-115	330
sp|P74591|AROE_SYNY3	WP_012306922.1	27.500	80	54	2	121	200	178	253	0.002	35.4
sll1669	P72796	shikimate kinase	aroK	aroK	Chorismate biosynthesis	Amino acid biosynthesis	Unknown	0.641780203	20.7	0.0
BLAST Output	PCC 11901 Accession	Percentage Identity	Alignment Length	Mismatches	Gap Open	Synechocystis sp. PCC 6803 Start	Synechocystis sp. PCC 6803 End	PCC 11901 Start	PCC 11901 End	E-value	Bit Score
sp|P72796|AROK_SYNY3	WP_012308113.1	49.419	172	87	0	10	181	5	176	8.36e-60	181
sp|P72796|AROK_SYNY3	WP_030007136.1	42.308	26	15	0	11	36	4	29	0.14	28.5
sp|P72796|AROK_SYNY3	WP_138071766.1	41.379	29	17	0	17	45	14	42	0.18	28.5
sp|P72796|AROK_SYNY3	WP_012306671.1	48.148	27	14	0	11	37	3	29	0.41	27.3
sp|P72796|AROK_SYNY3	WP_099238163.1	35.294	51	28	1	12	62	373	418	0.66	26.9
sp|P72796|AROK_SYNY3	WP_030008138.1	43.750	32	18	0	63	94	287	318	0.69	26.9
sp|P72796|AROK_SYNY3	WP_138073103.1	28.571	56	33	1	15	70	219	267	0.75	26.9
sp|P72796|AROK_SYNY3	WP_138072293.1	42.424	33	19	0	19	51	290	322	0.80	26.6
sp|P72796|AROK_SYNY3	WP_012307148.1	34.000	50	33	0	9	58	128	177	0.98	26.6
slr0444	Q59975	3-phosphoshikimate 1-carboxyvinyltransferase	aroA	aroA	Chorismate biosynthesis	Amino acid biosynthesis	Soluble proteins	0.914761148	43.7	0.0
BLAST Output	PCC 11901 Accession	Percentage Identity	Alignment Length	Mismatches	Gap Open	Synechocystis sp. PCC 6803 Start	Synechocystis sp. PCC 6803 End	PCC 11901 Start	PCC 11901 End	E-value	Bit Score
sp|Q59975|AROA_SYNY3	WP_138072116.1	70.495	444	131	0	3	446	1	444	0.0	628
sp|Q59975|AROA_SYNY3	WP_045441543.1	26.126	222	148	7	43	260	188	397	3.30e-05	42.4
sp|Q59975|AROA_SYNY3	WP_138073684.1	24.000	125	70	5	55	163	475	590	0.18	30.4
sp|Q59975|AROA_SYNY3	WP_012305903.1	32.558	43	29	0	138	180	99	141	0.41	29.3
sll1747	P23353	chorismate synthase	aroC	aroC	Chorismate biosynthesis	Amino acid biosynthesis	Unknown	0.748486328	39.3	0.0
BLAST Output	PCC 11901 Accession	Percentage Identity	Alignment Length	Mismatches	Gap Open	Synechocystis sp. PCC 6803 Start	Synechocystis sp. PCC 6803 End	PCC 11901 Start	PCC 11901 End	E-value	Bit Score
sp|P23353|AROC_SYNY3	WP_138073617.1	76.860	363	83	1	1	362	1	363	0.0	568
sp|P23353|AROC_SYNY3	WP_138073167.1	50.000	24	12	0	196	219	117	140	0.43	28.1
sp|P23353|AROC_SYNY3	WP_138073034.1	27.273	88	50	2	217	298	579	658	0.57	28.5
Metabolism and degradation of secondary saccharides
sll0207	Q55689	glucose-1-phosphate thymidylyltransferase	rfbA	rfbA	Rhamnose biosynthesis	Cell Envelope	Soluble proteins	0.913364146	42.8	0.0
BLAST Output	PCC 11901 Accession	Percentage Identity	Alignment Length	Mismatches	Gap Open	Synechocystis sp. PCC 6803 Start	Synechocystis sp. PCC 6803 End	PCC 11901 Start	PCC 11901 End	E-value	Bit Score
tr|Q55689|Q55689_SYNY3	WP_030006585.1	28.235	340	200	11	29	330	1	334	3.49e-29	114
tr|Q55689|Q55689_SYNY3	WP_012306577.1	28.037	321	210	12	29	341	1	308	8.33e-26	106
tr|Q55689|Q55689_SYNY3	WP_062436083.1	23.380	355	213	13	33	364	6	324	7.37e-09	53.5
tr|Q55689|Q55689_SYNY3	WP_062431685.1	21.221	344	214	14	40	339	15	345	1.57e-05	43.1
tr|Q55689|Q55689_SYNY3	WP_138072408.1	26.667	45	33	0	134	178	408	452	0.54	28.9
tr|Q55689|Q55689_SYNY3	WP_138071313.1	34.615	52	28	2	102	147	293	344	0.87	28.1
tr|Q55689|Q55689_SYNY3	WP_138073557.1	55.556	27	11	1	324	350	236	261	0.93	27.7
slr0836	Q55420	dTDP-glucose 4,6-dehydratase	rfbB	rfbB	Rhamnose biosynthesis	Cell Envelope
BLAST Output	PCC 11901 Accession	Percentage Identity	Alignment Length	Mismatches	Gap Open	Synechocystis sp. PCC 6803 Start	Synechocystis sp. PCC 6803 End	PCC 11901 Start	PCC 11901 End	E-value	Bit Score
tr|Q55420|Q55420_SYNY3	WP_138073408.1	31.054	351	195	14	1	330	1	325	2.33e-35	128
tr|Q55420|Q55420_SYNY3	WP_138073475.1	29.464	336	200	13	4	329	2	310	4.13e-29	110
tr|Q55420|Q55420_SYNY3	WP_138071301.1	27.003	337	208	13	6	335	3	308	3.34e-24	97.4
tr|Q55420|Q55420_SYNY3	WP_138071899.1	26.361	349	199	13	1	333	4	310	3.29e-21	89.0
tr|Q55420|Q55420_SYNY3	WP_138071577.1	26.543	324	220	8	1	317	1	313	6.02e-21	89.0
tr|Q55420|Q55420_SYNY3	WP_138073434.1	26.601	203	137	6	130	328	91	285	3.27e-08	50.8
tr|Q55420|Q55420_SYNY3	WP_065710302.1	21.959	296	159	13	6	241	3	286	0.10	30.8
slr0809	P74036	dTDP-glucose 4,6-dehydratase	rfbB	rfbB	Rhamnose biosynthesis	Cell Envelope	Soluble proteins	0.851345046	36.9	0.0
BLAST Output	PCC 11901 Accession	Percentage Identity	Alignment Length	Mismatches	Gap Open	Synechocystis sp. PCC 6803 Start	Synechocystis sp. PCC 6803 End	PCC 11901 Start	PCC 11901 End	E-value	Bit Score
tr|P74036|P74036_SYNY3	WP_138071301.1	79.739	306	62	0	20	325	1	306	0.0	527
tr|P74036|P74036_SYNY3	WP_138073475.1	31.190	311	189	10	21	315	3	304	7.07e-36	129
tr|P74036|P74036_SYNY3	WP_138073408.1	28.205	312	190	8	22	307	6	309	3.33e-24	97.4
tr|P74036|P74036_SYNY3	WP_138071899.1	26.168	321	197	13	21	322	8	307	1.19e-12	63.9
tr|P74036|P74036_SYNY3	WP_138071577.1	23.939	330	211	12	21	320	5	324	2.09e-09	54.7
tr|P74036|P74036_SYNY3	WP_065710302.1	23.846	390	194	19	20	326	1	370	7.89e-08	49.7
tr|P74036|P74036_SYNY3	WP_138073434.1	23.344	317	197	12	20	321	1	286	2.39e-06	45.1
tr|P74036|P74036_SYNY3	WP_138073328.1	23.264	288	170	15	20	285	1	259	0.010	33.5
tr|P74036|P74036_SYNY3	WP_062431858.1	40.000	30	18	0	20	49	1	30	0.062	31.2
tr|P74036|P74036_SYNY3	WP_030007350.1	34.286	35	23	0	216	250	177	211	0.27	29.3
slr0985	P72887	dTDP-4-dehydrorhamnose 3,5-epimerase	rfbC	rfbC, slr0985	Rhamnose biosynthesis	Cell Envelope	Soluble proteins	0.658052417	20.9	0.0
BLAST Output	PCC 11901 Accession	Percentage Identity	Alignment Length	Mismatches	Gap Open	Synechocystis sp. PCC 6803 Start	Synechocystis sp. PCC 6803 End	PCC 11901 Start	PCC 11901 End	E-value	Bit Score
tr|P72887|P72887_SYNY3	WP_030007788.1	32.203	59	34	1	104	162	105	157	0.26	28.1
slr1933	P74488	dTDP-4-dehydrorhamnose 3,5-epimerase	rfbC	rfbC	Rhamnose biosynthesis	Cell Envelope	Soluble proteins	0.861043108	20.6	0.0
BLAST Output	PCC 11901 Accession	Percentage Identity	Alignment Length	Mismatches	Gap Open	Synechocystis sp. PCC 6803 Start	Synechocystis sp. PCC 6803 End	PCC 11901 Start	PCC 11901 End	E-value	Bit Score
tr|P74488|P74488_SYNY3	WP_138071746.1	25.333	75	54	2	29	101	82	156	0.12	28.9
tr|P74488|P74488_SYNY3	WP_138073883.1	35.000	40	23	1	100	136	595	634	0.81	26.9
sll1395	P72621	dTDP-6-deoxy-L-mannose-dehydrogenase	rfbD	rfbD	Rhamnose biosynthesis	Cell Envelope	Large ribosomal protein	0.755016448	30.2	0.0
BLAST Output	PCC 11901 Accession	Percentage Identity	Alignment Length	Mismatches	Gap Open	Synechocystis sp. PCC 6803 Start	Synechocystis sp. PCC 6803 End	PCC 11901 Start	PCC 11901 End	E-value	Bit Score
tr|P72621|P72621_SYNY3	WP_138073918.1	29.787	94	58	5	121	211	115	203	0.36	28.5
tr|P72621|P72621_SYNY3	WP_138073434.1	20.455	88	65	2	71	154	78	164	0.71	27.7
slr1072	P72908	GDP-D-mannose dehydratase	rfbD	rfbD, yefA	Rhamnose biosynthesis	Cell Envelope	Unknown	0.590691977	35.7	0.0
BLAST Output	PCC 11901 Accession	Percentage Identity	Alignment Length	Mismatches	Gap Open	Synechocystis sp. PCC 6803 Start	Synechocystis sp. PCC 6803 End	PCC 11901 Start	PCC 11901 End	E-value	Bit Score
tr|P72908|P72908_SYNY3	WP_138071577.1	44.375	320	169	2	4	314	6	325	5.60e-97	287
tr|P72908|P72908_SYNY3	WP_138073475.1	21.846	325	200	12	1	309	1	287	7.07e-06	43.5
tr|P72908|P72908_SYNY3	WP_138071301.1	25.121	207	129	9	75	262	66	265	1.28e-04	39.7
tr|P72908|P72908_SYNY3	WP_138073408.1	20.635	252	179	6	67	302	65	311	2.90e-04	38.5
tr|P72908|P72908_SYNY3	WP_138072164.1	32.394	71	46	2	2	71	6	75	0.042	31.6
tr|P72908|P72908_SYNY3	WP_012305806.1	22.222	90	56	2	115	193	88	174	0.35	28.9
tr|P72908|P72908_SYNY3	WP_138071041.1	31.250	48	33	0	223	270	139	186	0.35	28.5
tr|P72908|P72908_SYNY3	WP_138071899.1	22.892	166	106	7	147	300	137	292	0.78	27.7
sll0220	P72720	L-glutamine:D-fructose-6-P amidotransferase	glmS	glmS	UDP-N-Acetylglucosamine biosynthesis	Cell Envelope	Soluble proteins	0.886522986	69.6	0.0
BLAST Output	PCC 11901 Accession	Percentage Identity	Alignment Length	Mismatches	Gap Open	Synechocystis sp. PCC 6803 Start	Synechocystis sp. PCC 6803 End	PCC 11901 Start	PCC 11901 End	E-value	Bit Score
sp|P72720|GLMS_SYNY3	WP_030006252.1	70.253	632	178	3	1	631	1	623	0.0	908
sp|P72720|GLMS_SYNY3	WP_138072535.1	28.125	256	155	11	2	240	20	263	1.82e-13	69.3
sll1758	P73648	MrsA protein homolog	glmM	glmM	UDP-N-Acetylglucosamine biosynthesis	Cell Envelope
BLAST Output	PCC 11901 Accession	Percentage Identity	Alignment Length	Mismatches	Gap Open	Synechocystis sp. PCC 6803 Start	Synechocystis sp. PCC 6803 End	PCC 11901 Start	PCC 11901 End	E-value	Bit Score
sp|P73648|GLMM_SYNY3	WP_138072422.1	66.813	455	150	1	26	479	27	481	0.0	612
sp|P73648|GLMM_SYNY3	WP_030007883.1	27.837	467	306	11	32	474	11	470	4.85e-33	127
sp|P73648|GLMM_SYNY3	WP_138073800.1	27.646	463	295	14	32	461	11	466	3.57e-25	104
sp|P73648|GLMM_SYNY3	WP_012306577.1	25.490	306	216	7	31	333	384	680	3.59e-14	71.6
sll0899	Q55504	UDP-N-acetylglucosamine pyrophosphorylase	glmU	glmU	UDP-N-Acetylglucosamine biosynthesis	Cell Envelope	Soluble proteins	0.923730558	48.9	0.0
BLAST Output	PCC 11901 Accession	Percentage Identity	Alignment Length	Mismatches	Gap Open	Synechocystis sp. PCC 6803 Start	Synechocystis sp. PCC 6803 End	PCC 11901 Start	PCC 11901 End	E-value	Bit Score
sp|Q55504|GLMU_SYNY3	WP_062436083.1	63.758	447	162	0	1	447	1	447	0.0	609
sp|Q55504|GLMU_SYNY3	WP_030006585.1	23.121	346	219	13	6	322	5	332	1.45e-08	53.1
sp|Q55504|GLMU_SYNY3	WP_012306577.1	21.814	463	298	19	6	436	5	435	1.56e-07	50.1
sp|Q55504|GLMU_SYNY3	WP_138072383.1	29.787	141	85	4	314	441	23	162	4.85e-07	46.6
sp|Q55504|GLMU_SYNY3	WP_138073298.1	29.630	108	57	4	351	441	80	185	1.23e-04	39.3
sp|Q55504|GLMU_SYNY3	WP_138071492.1	34.545	55	36	0	389	443	88	142	3.82e-04	37.7
sp|Q55504|GLMU_SYNY3	WP_138073759.1	30.120	83	50	2	367	441	86	168	4.37e-04	37.7
sp|Q55504|GLMU_SYNY3	WP_138073551.1	37.500	64	36	1	384	443	109	172	4.67e-04	38.1
sp|Q55504|GLMU_SYNY3	WP_084150040.1	26.364	110	48	3	361	437	84	193	0.021	32.7
sp|Q55504|GLMU_SYNY3	WP_065710799.1	25.000	52	39	0	386	437	113	164	0.49	28.9
sll1558	P74285	mannose-1-phosphate guanyltransferase	cugP	sll1558	Unknown Proteins	Unknown Proteins	Soluble proteins	0.875656747	42.7	0.0
BLAST Output	PCC 11901 Accession	Percentage Identity	Alignment Length	Mismatches	Gap Open	Synechocystis sp. PCC 6803 Start	Synechocystis sp. PCC 6803 End	PCC 11901 Start	PCC 11901 End	E-value	Bit Score
sp|P74285|CUGP_SYNY3	WP_030006585.1	80.109	367	73	0	1	367	1	367	0.0	617
sp|P74285|CUGP_SYNY3	WP_012306577.1	34.341	364	217	6	1	364	1	342	5.15e-68	226
sp|P74285|CUGP_SYNY3	WP_062431685.1	25.767	163	97	5	110	250	117	277	9.64e-12	62.4
sp|P74285|CUGP_SYNY3	WP_062436083.1	23.867	331	201	12	5	320	6	300	5.10e-07	47.8
sll0244	P73887	UDP-glucose 4-epimerase	galE	galE, galD	Random proteins (Sugars)	Energy Metabolism	Soluble proteins	0.883706272	37.1	0.0
BLAST Output	PCC 11901 Accession	Percentage Identity	Alignment Length	Mismatches	Gap Open	Synechocystis sp. PCC 6803 Start	Synechocystis sp. PCC 6803 End	PCC 11901 Start	PCC 11901 End	E-value	Bit Score
tr|P73887|P73887_SYNY3	WP_138073408.1	66.361	327	109	1	5	330	4	330	9.51e-164	457
tr|P73887|P73887_SYNY3	WP_138073475.1	27.356	329	210	10	7	326	4	312	2.57e-24	97.8
tr|P73887|P73887_SYNY3	WP_138071301.1	28.931	318	185	13	7	312	3	291	5.98e-22	90.9
tr|P73887|P73887_SYNY3	WP_138071899.1	25.392	319	193	12	3	308	5	291	3.92e-18	80.1
tr|P73887|P73887_SYNY3	WP_138071577.1	24.179	335	217	9	8	321	7	325	5.83e-13	65.5
tr|P73887|P73887_SYNY3	WP_138073434.1	26.582	158	87	6	7	161	3	134	1.78e-05	42.4
tr|P73887|P73887_SYNY3	WP_065710302.1	30.405	148	76	6	7	127	3	150	5.54e-05	40.8
tr|P73887|P73887_SYNY3	WP_099237631.1	30.579	121	73	5	7	125	3	114	1.03e-04	39.3
tr|P73887|P73887_SYNY3	WP_138073101.1	25.989	177	111	6	4	173	1776	1939	0.025	33.1
tr|P73887|P73887_SYNY3	WP_012305942.1	27.397	73	47	1	3	69	2	74	0.026	32.3
tr|P73887|P73887_SYNY3	WP_012307507.1	35.714	56	34	2	85	139	75	129	0.81	27.7
tr|P73887|P73887_SYNY3	WP_065711086.1	38.889	36	22	0	196	231	234	269	0.97	27.3
tr|P73887|P73887_SYNY3	WP_138073705.1	45.455	33	18	0	152	184	225	257	0.99	27.7
slr2074	P73377	similar to mannose-1-phosphate guanylyltransferase	manA	manA, pmi	Mannose and fucose metabolism	Energy Metabolism
BLAST Output	PCC 11901 Accession	Percentage Identity	Alignment Length	Mismatches	Gap Open	Synechocystis sp. PCC 6803 Start	Synechocystis sp. PCC 6803 End	PCC 11901 Start	PCC 11901 End	E-value	Bit Score
tr|P73377|P73377_SYNY3	WP_045442496.1	80.189	106	21	0	19	124	4	109	5.08e-63	184
tr|P73377|P73377_SYNY3	WP_138073828.1	58.407	113	47	0	16	128	18	130	4.90e-47	145
tr|P73377|P73377_SYNY3	WP_138071111.1	27.941	68	38	4	60	127	149	205	0.15	28.1
sll1496	P74589	mannose-1-phosphate guanyltransferase	manB	manB	Mannose and fucose metabolism	Energy Metabolism	Soluble proteins	0.90153001	92.4	0.0
BLAST Output	PCC 11901 Accession	Percentage Identity	Alignment Length	Mismatches	Gap Open	Synechocystis sp. PCC 6803 Start	Synechocystis sp. PCC 6803 End	PCC 11901 Start	PCC 11901 End	E-value	Bit Score
tr|P74589|P74589_SYNY3	WP_012306577.1	68.646	842	264	0	1	842	1	842	0.0	1228
tr|P74589|P74589_SYNY3	WP_030006585.1	33.041	342	213	6	1	326	1	342	1.44e-61	210
tr|P74589|P74589_SYNY3	WP_138072422.1	23.599	339	248	6	383	713	31	366	3.27e-19	88.2
tr|P74589|P74589_SYNY3	WP_062431685.1	24.485	388	220	16	12	335	15	393	4.69e-14	71.6
tr|P74589|P74589_SYNY3	WP_062436083.1	22.814	469	288	18	5	436	6	437	1.18e-13	70.5
tr|P74589|P74589_SYNY3	WP_030007883.1	22.124	452	319	12	385	811	11	454	2.13e-11	63.5
tr|P74589|P74589_SYNY3	WP_138073759.1	37.255	51	32	0	267	317	117	167	2.21e-05	42.4
tr|P74589|P74589_SYNY3	WP_138073759.1	34.146	41	24	1	243	280	108	148	0.35	29.6
tr|P74589|P74589_SYNY3	WP_138073800.1	21.206	481	323	16	385	824	11	476	1.58e-04	41.6
tr|P74589|P74589_SYNY3	WP_138073074.1	30.435	92	54	2	258	349	106	187	4.57e-04	39.7
tr|P74589|P74589_SYNY3	WP_065710799.1	34.884	43	28	0	270	312	120	162	0.25	30.8
tr|P74589|P74589_SYNY3	WP_138071492.1	27.559	127	72	3	243	365	31	141	0.28	30.0
tr|P74589|P74589_SYNY3	WP_138072029.1	26.752	157	101	5	247	396	6	155	0.28	30.4
tr|P74589|P74589_SYNY3	WP_138073298.1	28.302	53	38	0	263	315	130	182	0.31	30.0
tr|P74589|P74589_SYNY3	WP_138071916.1	38.636	44	27	0	149	192	253	296	0.42	30.4
tr|P74589|P74589_SYNY3	WP_138071343.1	34.483	58	37	1	549	605	35	92	0.47	30.0
tr|P74589|P74589_SYNY3	WP_138072383.1	26.271	118	52	5	246	357	7	95	0.82	28.9
sll1370	P74172	mannose-1-phosphate guanylyltransferase	manC	rfbM, manC	Mannose and fucose metabolism	Energy Metabolism	Soluble proteins	0.889484592	40.4	0.0
BLAST Output	PCC 11901 Accession	Percentage Identity	Alignment Length	Mismatches	Gap Open	Synechocystis sp. PCC 6803 Start	Synechocystis sp. PCC 6803 End	PCC 11901 Start	PCC 11901 End	E-value	Bit Score
tr|P74172|P74172_SYNY3	WP_138073321.1	57.059	340	140	3	19	357	3	337	2.91e-134	384
tr|P74172|P74172_SYNY3	WP_030006260.1	25.000	68	51	0	75	142	137	204	0.39	28.9
slr0493	Q55183	similar to mannose-1-phosphate guanylyltransferase		rfbM	Mannose and fucose metabolism	Energy Metabolism	Soluble proteins	0.875750962	14.4	0.0
BLAST Output	PCC 11901 Accession	Percentage Identity	Alignment Length	Mismatches	Gap Open	Synechocystis sp. PCC 6803 Start	Synechocystis sp. PCC 6803 End	PCC 11901 Start	PCC 11901 End	E-value	Bit Score
tr|Q55183|Q55183_SYNY3	WP_138073828.1	83.784	111	18	0	17	127	20	130	2.25e-70	204
tr|Q55183|Q55183_SYNY3	WP_045442496.1	66.667	108	36	0	16	123	2	109	3.74e-54	162
tr|Q55183|Q55183_SYNY3	WP_138072943.1	43.478	23	13	0	46	68	175	197	0.90	25.8
sll1212	P72586	GDP-mannose 4,6-dehydratase	gmd	gmd, rfbD	Mannose and fucose metabolism	Energy Metabolism	Soluble proteins	0.912684568	41.3	0.0
BLAST Output	PCC 11901 Accession	Percentage Identity	Alignment Length	Mismatches	Gap Open	Synechocystis sp. PCC 6803 Start	Synechocystis sp. PCC 6803 End	PCC 11901 Start	PCC 11901 End	E-value	Bit Score
tr|P72586|P72586_SYNY3	WP_138071577.1	77.437	359	79	1	4	362	3	359	0.0	593
tr|P72586|P72586_SYNY3	WP_138073475.1	25.595	336	198	12	1	318	1	302	2.85e-12	63.2
tr|P72586|P72586_SYNY3	WP_138073408.1	25.382	327	204	11	5	312	4	309	2.24e-11	60.8
tr|P72586|P72586_SYNY3	WP_138071301.1	22.630	327	199	13	7	316	3	292	6.81e-06	43.9
sll1213	P72585	GDP-fucose synthetase	wcaG	wcaG, sll1213	Mannose and fucose metabolism	Energy Metabolism	Soluble proteins	0.811420275	34.7	0.0
BLAST Output	PCC 11901 Accession	Percentage Identity	Alignment Length	Mismatches	Gap Open	Synechocystis sp. PCC 6803 Start	Synechocystis sp. PCC 6803 End	PCC 11901 Start	PCC 11901 End	E-value	Bit Score
tr|P72585|P72585_SYNY3	WP_138071899.1	77.670	309	69	0	1	309	1	309	0.0	517
tr|P72585|P72585_SYNY3	WP_138073408.1	22.741	343	216	11	4	311	1	329	8.26e-18	79.3
tr|P72585|P72585_SYNY3	WP_138073475.1	26.627	338	179	16	8	306	3	310	5.34e-16	73.9
tr|P72585|P72585_SYNY3	WP_138071301.1	25.552	317	210	10	8	310	2	306	7.89e-15	70.5
tr|P72585|P72585_SYNY3	WP_099237631.1	28.000	125	73	3	8	120	2	121	0.001	36.2
tr|P72585|P72585_SYNY3	WP_138073170.1	32.353	68	38	1	7	66	3	70	0.003	35.4
tr|P72585|P72585_SYNY3	WP_138071521.1	41.667	36	21	0	2	37	176	211	0.16	30.0
tr|P72585|P72585_SYNY3	WP_138073101.1	37.500	40	25	0	6	45	1776	1815	0.81	28.1
sll0045	Q55440	sucrose phosphate synthase	spsA	spsA, sps	Sucrose metabolism	Energy Metabolism	Soluble proteins	0.923290171	81.4	0.0
BLAST Output	PCC 11901 Accession	Percentage Identity	Alignment Length	Mismatches	Gap Open	Synechocystis sp. PCC 6803 Start	Synechocystis sp. PCC 6803 End	PCC 11901 Start	PCC 11901 End	E-value	Bit Score
tr|Q55440|Q55440_SYNY3	WP_138072899.1	63.254	713	254	1	4	716	6	710	0.0	951
tr|Q55440|Q55440_SYNY3	WP_138072897.1	29.545	264	160	8	470	711	7	266	1.06e-20	89.4
tr|Q55440|Q55440_SYNY3	WP_138071472.1	33.000	100	58	4	350	443	272	368	4.77e-08	52.0
tr|Q55440|Q55440_SYNY3	WP_065711271.1	24.044	183	117	5	252	432	183	345	1.34e-07	50.8
tr|Q55440|Q55440_SYNY3	WP_138073302.1	26.804	194	126	4	253	446	226	403	2.64e-07	50.1
tr|Q55440|Q55440_SYNY3	WP_138071062.1	26.816	179	100	7	256	427	258	412	6.84e-07	48.5
tr|Q55440|Q55440_SYNY3	WP_138073806.1	23.048	269	177	10	183	449	148	388	1.43e-06	47.4
tr|Q55440|Q55440_SYNY3	WP_065710775.1	23.175	315	201	12	122	432	95	372	1.45e-06	47.4
tr|Q55440|Q55440_SYNY3	WP_138071066.1	26.554	177	115	6	256	432	186	347	2.04e-06	47.0
tr|Q55440|Q55440_SYNY3	WP_138071414.1	23.602	161	75	4	244	393	192	315	7.17e-06	45.4
tr|Q55440|Q55440_SYNY3	WP_168191169.1	36.986	73	44	1	348	420	318	388	1.20e-05	44.7
tr|Q55440|Q55440_SYNY3	WP_138073291.1	20.301	133	96	3	297	428	243	366	4.42e-04	39.7
tr|Q55440|Q55440_SYNY3	WP_138073252.1	27.907	172	102	4	245	410	218	373	4.59e-04	39.7
tr|Q55440|Q55440_SYNY3	WP_030007336.1	33.333	87	44	5	334	411	180	261	5.87e-04	38.9
tr|Q55440|Q55440_SYNY3	WP_030005953.1	24.074	270	158	11	120	386	85	310	0.002	37.7
tr|Q55440|Q55440_SYNY3	WP_138073535.1	28.571	63	45	0	350	412	307	369	0.014	34.7
tr|Q55440|Q55440_SYNY3	WP_138073301.1	19.474	190	131	6	249	436	179	348	0.017	34.3
tr|Q55440|Q55440_SYNY3	WP_138073253.1	24.786	234	141	8	214	443	174	376	0.018	34.3
tr|Q55440|Q55440_SYNY3	WP_138073290.1	25.510	98	71	2	356	452	278	374	0.026	33.9
tr|Q55440|Q55440_SYNY3	WP_030008132.1	27.826	115	69	5	337	441	339	449	0.19	31.2
tr|Q55440|Q55440_SYNY3	WP_138071122.1	33.898	59	34	2	303	358	121	177	0.51	29.6
slr0953	P74325	sucrose-phosphate phosphatase	spp	spp, Sy-SPP, spsB	Sucrose metabolism	Energy Metabolism	Unknown	0.426504313	27.7	0.0
BLAST Output	PCC 11901 Accession	Percentage Identity	Alignment Length	Mismatches	Gap Open	Synechocystis sp. PCC 6803 Start	Synechocystis sp. PCC 6803 End	PCC 11901 Start	PCC 11901 End	E-value	Bit Score
tr|P74325|P74325_SYNY3	WP_138072899.1	29.167	240	165	3	6	243	472	708	1.80e-29	112
tr|P74325|P74325_SYNY3	WP_138072897.1	28.444	225	144	5	3	210	4	228	8.22e-16	71.6
tr|P74325|P74325_SYNY3	WP_138073555.1	34.694	49	29	1	173	218	206	254	0.49	27.7
sll0626	P74573	sucrose invertase	inv	lim17	Other	Other Categories	Unknown	0.541420223	56.7	0.0
BLAST Output	PCC 11901 Accession	Percentage Identity	Alignment Length	Mismatches	Gap Open	Synechocystis sp. PCC 6803 Start	Synechocystis sp. PCC 6803 End	PCC 11901 Start	PCC 11901 End	E-value	Bit Score
tr|P74573|P74573_SYNY3	WP_065711483.1	34.043	47	30	1	4	50	51	96	0.69	28.5
tr|P74573|P74573_SYNY3	WP_138073504.1	52.381	21	10	0	39	59	270	290	0.97	28.5
sll0593	Q55855	glucokinase	glk	glk, cglk, sll0593	Glycolysis	Energy Metabolism	Soluble proteins	0.851706573	37.7	0.0
No hits
slr1448	P73521	fructokinase	frkA	cscK	Unknown Proteins	Unknown Proteins	Unknown	0.585271872	33.1	0.0
BLAST Output	PCC 11901 Accession	Percentage Identity	Alignment Length	Mismatches	Gap Open	Synechocystis sp. PCC 6803 Start	Synechocystis sp. PCC 6803 End	PCC 11901 Start	PCC 11901 End	E-value	Bit Score
tr|P73521|P73521_SYNY3	WP_138072895.1	30.451	266	150	10	3	262	4	240	3.40e-19	82.4
tr|P73521|P73521_SYNY3	WP_138071452.1	32.258	62	38	1	35	96	47	104	0.11	30.4
tr|P73521|P73521_SYNY3	WP_138071452.1	39.583	48	24	3	225	267	229	276	0.25	29.3
tr|P73521|P73521_SYNY3	WP_045441679.1	29.688	64	36	2	105	166	134	190	0.40	28.5
sll1566	P74258	glucosylglycerolphosphate synthase	ggpS	ggpS	Glucosylglycerol biosynthesis	Central Intermediary Metabolism	Soluble proteins	0.848338516	56.8	0.0
BLAST Output	PCC 11901 Accession	Percentage Identity	Alignment Length	Mismatches	Gap Open	Synechocystis sp. PCC 6803 Start	Synechocystis sp. PCC 6803 End	PCC 11901 Start	PCC 11901 End	E-value	Bit Score
sp|P74258|GGPS_SYNY3	WP_030007709.1	76.305	498	116	2	1	497	1	497	0.0	788
slr0746	Q55034	glucosylglycerolphosphate phosphatase	ggpP	stpA, ggpP	Glucosylglycerol biosynthesis	Central Intermediary Metabolism	Soluble proteins	0.856909316	46.5	0.0
BLAST Output	PCC 11901 Accession	Percentage Identity	Alignment Length	Mismatches	Gap Open	Synechocystis sp. PCC 6803 Start	Synechocystis sp. PCC 6803 End	PCC 11901 Start	PCC 11901 End	E-value	Bit Score
sp|Q55034|STPA_SYNY3	WP_138071914.1	62.143	420	145	5	1	416	4	413	0.0	519
slr1167	P74246	glycerol dehydrogenase	gldA	gldA	Glycerol metabolism	Fatty acid, phospholipid and sterol metabolism	Soluble proteins	0.883810753	39.8	0.0
BLAST Output	PCC 11901 Accession	Percentage Identity	Alignment Length	Mismatches	Gap Open	Synechocystis sp. PCC 6803 Start	Synechocystis sp. PCC 6803 End	PCC 11901 Start	PCC 11901 End	E-value	Bit Score
sp|P74246|Y1167_SYNY3	WP_138072597.1	65.875	337	115	0	36	372	39	375	1.68e-161	455
slr1672	P74260	glycerol kinase	glpK	glpK	Glycerol metabolism	Fatty acid, phospholipid and sterol metabolism	Soluble proteins	0.866545858	54.3	0.0
BLAST Output	PCC 11901 Accession	Percentage Identity	Alignment Length	Mismatches	Gap Open	Synechocystis sp. PCC 6803 Start	Synechocystis sp. PCC 6803 End	PCC 11901 Start	PCC 11901 End	E-value	Bit Score
sp|P74260|GLPK_SYNY3	WP_030007700.1	73.182	440	117	1	5	443	3	442	0.0	681
sp|P74260|GLPK_SYNY3	WP_138072432.1	29.091	110	62	5	1	110	1	94	0.16	30.8
sll1085	P74257	glycerol-3-phosphate dehydrogenase	glpD	glpD, glyD, glpL	Glycerol metabolism	Fatty acid, phospholipid and sterol metabolism	Unknown	0.608609921	61.5	0.0
BLAST Output	PCC 11901 Accession	Percentage Identity	Alignment Length	Mismatches	Gap Open	Synechocystis sp. PCC 6803 Start	Synechocystis sp. PCC 6803 End	PCC 11901 Start	PCC 11901 End	E-value	Bit Score
sp|P74257|GLPD_SYNY3	WP_138071928.1	67.572	552	176	3	1	550	1	551	0.0	749
sp|P74257|GLPD_SYNY3	WP_138073502.1	38.776	49	30	0	7	55	7	55	0.001	37.7
sp|P74257|GLPD_SYNY3	WP_138072806.1	38.182	55	31	1	2	56	6	57	0.004	36.2
sp|P74257|GLPD_SYNY3	WP_138073620.1	41.304	46	26	1	8	53	163	207	0.33	30.0
sp|P74257|GLPD_SYNY3	WP_012306057.1	30.263	76	37	3	288	351	111	182	0.91	28.5
Amino acid biosynthesis
Isoleucine, valine and leucine biosynthesis
slr2072	P73375	L-threonine deaminase	ilvA	ilvA	Isoleucine, valine, leucine biosynthesis	Amino acid biosynthesis	Soluble proteins	0.891013033	56.5	0.0
BLAST Output	PCC 11901 Accession	Percentage Identity	Alignment Length	Mismatches	Gap Open	Synechocystis sp. PCC 6803 Start	Synechocystis sp. PCC 6803 End	PCC 11901 Start	PCC 11901 End	E-value	Bit Score
tr|P73375|P73375_SYNY3	WP_065716511.1	74.359	507	125	1	1	507	1	502	0.0	752
tr|P73375|P73375_SYNY3	WP_012305920.1	25.685	292	187	11	21	291	91	373	1.05e-06	47.4
tr|P73375|P73375_SYNY3	WP_045442698.1	27.545	167	116	4	20	183	47	211	6.15e-06	44.7
tr|P73375|P73375_SYNY3	WP_062433171.1	30.052	193	126	3	21	204	14	206	1.25e-04	40.4
tr|P73375|P73375_SYNY3	WP_168191118.1	31.461	89	53	3	17	98	68	155	0.010	34.7
tr|P73375|P73375_SYNY3	WP_012305882.1	25.654	191	118	5	36	210	31	213	0.18	30.4
tr|P73375|P73375_SYNY3	WP_012306284.1	26.316	114	64	4	76	189	59	152	0.96	28.1
slr2088	P73913	acetohydroxy acid synthase	gcl	ilvG, gcl	Isoleucine, valine, leucine biosynthesis	Amino acid biosynthesis	Soluble proteins	1.0	67.7	0.0
BLAST Output	PCC 11901 Accession	Percentage Identity	Alignment Length	Mismatches	Gap Open	Synechocystis sp. PCC 6803 Start	Synechocystis sp. PCC 6803 End	PCC 11901 Start	PCC 11901 End	E-value	Bit Score
tr|P73913|P73913_SYNY3	WP_138071857.1	73.951	572	149	0	16	587	14	585	0.0	898
tr|P73913|P73913_SYNY3	WP_030007761.1	32.787	549	344	10	24	568	4	531	4.30e-88	281
tr|P73913|P73913_SYNY3	WP_138073309.1	27.083	96	67	1	26	121	15	107	2.49e-05	43.5
tr|P73913|P73913_SYNY3	WP_138073724.1	36.000	25	16	0	376	400	159	183	0.43	29.3
tr|P73913|P73913_SYNY3	WP_138071756.1	44.000	25	14	0	597	621	1	25	0.61	29.3
sll0065	Q55141	acetolactate synthase small subunit	ilvN	ilvN	Isoleucine, valine, leucine biosynthesis	Amino acid biosynthesis	Soluble proteins	1.0	18.9	0.0
BLAST Output	PCC 11901 Accession	Percentage Identity	Alignment Length	Mismatches	Gap Open	Synechocystis sp. PCC 6803 Start	Synechocystis sp. PCC 6803 End	PCC 11901 Start	PCC 11901 End	E-value	Bit Score
sp|Q55141|ILVH_SYNY3	WP_012308298.1	79.042	167	35	0	1	167	1	167	1.79e-92	263
sp|Q55141|ILVH_SYNY3	WP_045441614.1	31.000	100	52	3	88	170	455	554	0.44	27.3
sll1363	P29107	ketol-acid reductoisomerase	ilvC	ilvC	Isoleucine, valine, leucine biosynthesis	Amino acid biosynthesis	Soluble proteins	0.893474412	39.9	0.0
BLAST Output	PCC 11901 Accession	Percentage Identity	Alignment Length	Mismatches	Gap Open	Synechocystis sp. PCC 6803 Start	Synechocystis sp. PCC 6803 End	PCC 11901 Start	PCC 11901 End	E-value	Bit Score
sp|P29107|ILVC_SYNY3	WP_012306898.1	83.939	330	53	0	1	330	1	330	0.0	552
sp|P29107|ILVC_SYNY3	WP_138073324.1	35.294	68	42	2	18	83	3	70	0.042	31.6
sp|P29107|ILVC_SYNY3	WP_065711043.1	46.875	32	17	0	14	45	216	247	0.43	28.9
sp|P29107|ILVC_SYNY3	WP_138071426.1	25.581	129	88	4	108	230	486	612	0.50	28.5
slr0452	P74689	dihydroxyacid dehydratase	edd	ilvD	Isoleucine, valine, leucine biosynthesis	Amino acid biosynthesis	Soluble proteins	0.891295412	58.6	0.0
BLAST Output	PCC 11901 Accession	Percentage Identity	Alignment Length	Mismatches	Gap Open	Synechocystis sp. PCC 6803 Start	Synechocystis sp. PCC 6803 End	PCC 11901 Start	PCC 11901 End	E-value	Bit Score
sp|P74689|ILVD_SYNY3	WP_030005899.1	81.462	561	104	0	1	561	1	561	0.0	954
sp|P74689|ILVD_SYNY3	WP_138073144.1	34.783	46	29	1	312	357	91	135	0.78	28.1
sp|P74689|ILVD_SYNY3	WP_099238053.1	30.000	50	28	1	442	484	53	102	0.91	28.5
slr0032	P54691	probable branched-chain amino acid aminotransferase	ilvE	ilvE	Isoleucine, valine, leucine biosynthesis	Amino acid biosynthesis	Soluble proteins	0.872448964	33.9	0.0
BLAST Output	PCC 11901 Accession	Percentage Identity	Alignment Length	Mismatches	Gap Open	Synechocystis sp. PCC 6803 Start	Synechocystis sp. PCC 6803 End	PCC 11901 Start	PCC 11901 End	E-value	Bit Score
sp|P54691|ILVE_SYNY3	WP_138073497.1	75.000	304	76	0	1	304	1	304	8.75e-178	490
sp|P54691|ILVE_SYNY3	WP_138072339.1	23.932	234	150	10	57	282	51	264	5.29e-05	40.4
slr0186	P48576	2-isopropylmalate synthase	leuA	leuA	Isoleucine, valine, leucine biosynthesis	Amino acid biosynthesis	Soluble proteins	1.0	57.4	0.0
BLAST Output	PCC 11901 Accession	Percentage Identity	Alignment Length	Mismatches	Gap Open	Synechocystis sp. PCC 6803 Start	Synechocystis sp. PCC 6803 End	PCC 11901 Start	PCC 11901 End	E-value	Bit Score
sp|P48576|LEU1_SYNY3	WP_062433790.1	79.925	533	107	0	1	533	1	533	0.0	884
sp|P48576|LEU1_SYNY3	WP_138072739.1	30.601	549	332	16	1	523	1	526	2.60e-58	199
sp|P48576|LEU1_SYNY3	WP_138073402.1	32.258	62	34	2	185	238	918	979	0.76	28.9
sll1564	P74269	putative lyase		leuA	Isoleucine, valine, leucine biosynthesis	Amino acid biosynthesis	Soluble proteins	0.89091227	59.8	0.0
BLAST Output	PCC 11901 Accession	Percentage Identity	Alignment Length	Mismatches	Gap Open	Synechocystis sp. PCC 6803 Start	Synechocystis sp. PCC 6803 End	PCC 11901 Start	PCC 11901 End	E-value	Bit Score
sp|P74269|CIMA_SYNY3	WP_138072739.1	70.677	532	146	2	1	532	1	522	0.0	776
sp|P74269|CIMA_SYNY3	WP_062433790.1	26.987	541	354	15	1	528	1	513	8.54e-44	159
sll1470	P54384	3-isopropylmalate dehydratase large subunit	leuC	leuC	Isoleucine, valine, leucine biosynthesis	Amino acid biosynthesis	Unknown	0.55349691	50.4	0.0
BLAST Output	PCC 11901 Accession	Percentage Identity	Alignment Length	Mismatches	Gap Open	Synechocystis sp. PCC 6803 Start	Synechocystis sp. PCC 6803 End	PCC 11901 Start	PCC 11901 End	E-value	Bit Score
sp|P54384|LEUC_SYNY3	WP_138073201.1	81.545	466	86	0	1	466	1	466	0.0	804
sp|P54384|LEUC_SYNY3	WP_138073389.1	23.978	367	216	13	128	467	486	816	1.46e-13	69.3
sp|P54384|LEUC_SYNY3	WP_138071571.1	30.000	40	28	0	230	269	109	148	0.56	28.9
sll1444	P74207	3-isopropylmalate dehydratase small subunit	leuD	leuD, sll1444	Isoleucine, valine, leucine biosynthesis	Amino acid biosynthesis	Soluble proteins	0.70716752	21.6	0.0
BLAST Output	PCC 11901 Accession	Percentage Identity	Alignment Length	Mismatches	Gap Open	Synechocystis sp. PCC 6803 Start	Synechocystis sp. PCC 6803 End	PCC 11901 Start	PCC 11901 End	E-value	Bit Score
sp|P74207|LEUD_SYNY3	WP_065710064.1	65.979	194	66	0	2	195	3	196	4.02e-96	275
sp|P74207|LEUD_SYNY3	WP_138073924.1	26.882	93	58	3	89	179	171	255	0.80	26.9
slr1517	P73960	3-isopropylmalate dehydrogenase	leuB	leuB	Isoleucine, valine, leucine biosynthesis	Amino acid biosynthesis	Soluble proteins	0.883796647	38.6	0.0
BLAST Output	PCC 11901 Accession	Percentage Identity	Alignment Length	Mismatches	Gap Open	Synechocystis sp. PCC 6803 Start	Synechocystis sp. PCC 6803 End	PCC 11901 Start	PCC 11901 End	E-value	Bit Score
sp|P73960|LEU3_SYNY3	WP_012307950.1	76.667	360	84	0	1	360	1	360	0.0	549
sp|P73960|LEU3_SYNY3	WP_138072679.1	44.737	38	19	1	281	318	307	342	0.36	28.9
Glutamate/glutamine biosynthesis
slr0710	P54386	glutamate dehydrogenase (NADP+)	gdhA	gdhA	Glutamate biosynthesis	Amino acid biosynthesis	Soluble proteins	0.911713694	47.3	0.0
BLAST Output	PCC 11901 Accession	Percentage Identity	Alignment Length	Mismatches	Gap Open	Synechocystis sp. PCC 6803 Start	Synechocystis sp. PCC 6803 End	PCC 11901 Start	PCC 11901 End	E-value	Bit Score
sp|P54386|DHE4_SYNY3	WP_138072784.1	69.647	425	129	0	4	428	5	429	0.0	629
sp|P54386|DHE4_SYNY3	WP_138073653.1	35.714	56	31	2	234	284	30	85	0.052	32.0
sp|P54386|DHE4_SYNY3	WP_138072974.1	21.429	140	100	5	205	337	331	467	0.34	29.6
slr1746	P73737	glutamate racemase	murI	murI, dga, mulI	Peptidoglycan biosynthesis	Cell Envelope
BLAST Output	PCC 11901 Accession	Percentage Identity	Alignment Length	Mismatches	Gap Open	Synechocystis sp. PCC 6803 Start	Synechocystis sp. PCC 6803 End	PCC 11901 Start	PCC 11901 End	E-value	Bit Score
sp|P73737|MURI_SYNY3	WP_065715968.1	62.921	267	99	0	1	267	1	267	1.07e-127	361
slr1756	P77961	glutamate--ammonia ligase	glnA	glnA, slr1756, icd	Glutamate biosynthesis	Amino acid biosynthesis	Unknown	0.420327221	53.0	0.0
BLAST Output	PCC 11901 Accession	Percentage Identity	Alignment Length	Mismatches	Gap Open	Synechocystis sp. PCC 6803 Start	Synechocystis sp. PCC 6803 End	PCC 11901 Start	PCC 11901 End	E-value	Bit Score
sp|P77961|GLN1B_SYNY3	WP_030006983.1	80.127	473	94	0	1	473	1	473	0.0	819
sp|P77961|GLN1B_SYNY3	WP_138072198.1	26.027	219	143	6	111	323	199	404	1.46e-06	47.0
sp|P77961|GLN1B_SYNY3	WP_138071654.1	29.213	89	57	2	48	130	273	361	0.31	30.0
sp|P77961|GLN1B_SYNY3	WP_181445696.1	19.718	71	55	1	203	271	371	441	0.35	29.6
slr0288	P77970	glutamate--ammonia ligase	glnN	glnN	Glutamate biosynthesis	Amino acid biosynthesis	Unknown	0.486469434	79.2	0.0
BLAST Output	PCC 11901 Accession	Percentage Identity	Alignment Length	Mismatches	Gap Open	Synechocystis sp. PCC 6803 Start	Synechocystis sp. PCC 6803 End	PCC 11901 Start	PCC 11901 End	E-value	Bit Score
tr|P77970|P77970_SYNY3	WP_138072198.1	83.149	724	122	0	1	724	1	724	0.0	1267
tr|P77970|P77970_SYNY3	WP_030006983.1	29.252	147	97	4	260	404	182	323	1.13e-07	51.2
tr|P77970|P77970_SYNY3	WP_062432115.1	36.232	69	42	2	502	569	5	72	0.25	30.8
tr|P77970|P77970_SYNY3	WP_012305956.1	32.075	53	29	1	10	62	92	137	0.98	27.7
sll1502	P55037	NADH-dependent glutamate synthase large subunit	gltB	gltB	Glutamate biosynthesis	Amino acid biosynthesis	Soluble proteins	0.896508977	169.0	0.0
BLAST Output	PCC 11901 Accession	Percentage Identity	Alignment Length	Mismatches	Gap Open	Synechocystis sp. PCC 6803 Start	Synechocystis sp. PCC 6803 End	PCC 11901 Start	PCC 11901 End	E-value	Bit Score
sp|P55037|GLTB_SYNY3	WP_138071367.1	45.839	1514	759	16	39	1509	28	1523	0.0	1309
sp|P55037|GLTB_SYNY3	WP_138072039.1	30.233	86	52	2	382	462	82	164	0.55	30.8
sll1027	P72762	NADH-dependent glutamate synthase small subunit	gltD	gltD	Glutamate biosynthesis	Amino acid biosynthesis	Soluble proteins	0.911902081	54.1	0.0
BLAST Output	PCC 11901 Accession	Percentage Identity	Alignment Length	Mismatches	Gap Open	Synechocystis sp. PCC 6803 Start	Synechocystis sp. PCC 6803 End	PCC 11901 Start	PCC 11901 End	E-value	Bit Score
tr|P72762|P72762_SYNY3	WP_138073353.1	55.556	36	16	0	154	189	5	40	7.15e-04	38.5
tr|P72762|P72762_SYNY3	WP_138072513.1	47.222	36	19	0	154	189	2	37	0.007	35.4
tr|P72762|P72762_SYNY3	WP_030006437.1	50.000	36	18	0	154	189	2	37	0.012	34.3
tr|P72762|P72762_SYNY3	WP_030007645.1	54.839	31	14	0	154	184	4	34	0.016	33.9
tr|P72762|P72762_SYNY3	WP_138073175.1	24.597	248	136	13	135	359	149	368	0.035	33.1
tr|P72762|P72762_SYNY3	WP_138073502.1	51.429	35	17	0	155	189	14	48	0.096	31.6
tr|P72762|P72762_SYNY3	WP_138072945.1	44.444	27	15	0	294	320	13	39	0.16	30.8
tr|P72762|P72762_SYNY3	WP_138073254.1	20.645	155	103	4	25	164	253	402	0.17	30.8
tr|P72762|P72762_SYNY3	WP_138073777.1	51.852	27	13	0	154	180	2	28	0.34	29.6
tr|P72762|P72762_SYNY3	WP_065711238.1	48.485	33	17	0	150	182	3	35	0.50	29.3
tr|P72762|P72762_SYNY3	WP_138072667.1	29.801	151	71	7	150	265	2	152	0.99	28.1
sll1499	P55038	ferredoxin-dependent glutamate synthase	glsF	gltS, glsF	Glutamate biosynthesis	Amino acid biosynthesis	Soluble proteins	0.903480195	168.2	0.0
BLAST Output	PCC 11901 Accession	Percentage Identity	Alignment Length	Mismatches	Gap Open	Synechocystis sp. PCC 6803 Start	Synechocystis sp. PCC 6803 End	PCC 11901 Start	PCC 11901 End	E-value	Bit Score
sp|P55038|GLTS_SYNY3	WP_138071367.1	71.270	1535	430	6	24	1556	19	1544	0.0	2279
sp|P55038|GLTS_SYNY3	WP_138072369.1	68.421	19	6	0	1185	1203	89	107	0.32	30.4
Proline biosynthesis/degradation
slr2035	P73071	glutamate 5-kinase	proB	proB	Proline biosynthesis	Amino acid biosynthesis	Soluble proteins	0.950280635	40.1	0.0
BLAST Output	PCC 11901 Accession	Percentage Identity	Alignment Length	Mismatches	Gap Open	Synechocystis sp. PCC 6803 Start	Synechocystis sp. PCC 6803 End	PCC 11901 Start	PCC 11901 End	E-value	Bit Score
sp|P73071|PROB_SYNY3	WP_012307393.1	65.847	366	125	0	7	372	2	367	4.33e-177	494
sp|P73071|PROB_SYNY3	WP_012306580.1	42.500	40	23	0	150	189	136	175	0.003	35.4
sp|P73071|PROB_SYNY3	WP_012308112.1	27.907	129	75	6	125	248	160	275	0.14	30.4
sp|P73071|PROB_SYNY3	WP_138072597.1	26.126	111	74	3	25	133	49	153	0.33	29.3
sll0373	P54902	gamma-glutamyl phosphate reductase	proA	proA	Proline biosynthesis	Amino acid biosynthesis	Soluble proteins	0.908207958	46.3	0.0
BLAST Output	PCC 11901 Accession	Percentage Identity	Alignment Length	Mismatches	Gap Open	Synechocystis sp. PCC 6803 Start	Synechocystis sp. PCC 6803 End	PCC 11901 Start	PCC 11901 End	E-value	Bit Score
sp|P54902|PROA1_SYNY3	WP_138071658.1	71.021	421	122	0	13	433	8	428	0.0	616
sp|P54902|PROA1_SYNY3	WP_065711612.1	32.763	409	258	5	15	412	18	420	1.08e-55	187
sp|P54902|PROA1_SYNY3	WP_138071828.1	33.898	59	38	1	222	279	224	282	0.31	29.6
sll0461	Q55167	gamma-glutamyl phosphate reductase	proA	proA	Proline biosynthesis	Amino acid biosynthesis	Soluble proteins	0.929277067	45.7	0.0
BLAST Output	PCC 11901 Accession	Percentage Identity	Alignment Length	Mismatches	Gap Open	Synechocystis sp. PCC 6803 Start	Synechocystis sp. PCC 6803 End	PCC 11901 Start	PCC 11901 End	E-value	Bit Score
sp|Q55167|PROA2_SYNY3	WP_065711612.1	53.110	418	191	2	2	418	9	422	2.89e-154	439
sp|Q55167|PROA2_SYNY3	WP_138071658.1	29.243	383	261	4	32	411	27	402	3.29e-46	161
sp|Q55167|PROA2_SYNY3	WP_062433464.1	30.667	75	47	2	98	169	457	529	0.19	30.4
sp|Q55167|PROA2_SYNY3	WP_138071828.1	28.090	89	56	3	327	413	369	451	0.19	30.4
sp|Q55167|PROA2_SYNY3	WP_168191138.1	28.030	132	78	6	63	189	603	722	0.31	29.6
sp|Q55167|PROA2_SYNY3	WP_138072015.1	28.986	69	46	2	325	390	131	199	0.34	29.3
sp|Q55167|PROA2_SYNY3	WP_012307980.1	27.692	65	44	1	145	206	29	93	0.60	28.5
slr0661	P74572	pyrroline-5-carboxylate reductase	proC	proC	Proline biosynthesis	Amino acid biosynthesis	Unknown	0.469447212	27.9	0.0
BLAST Output	PCC 11901 Accession	Percentage Identity	Alignment Length	Mismatches	Gap Open	Synechocystis sp. PCC 6803 Start	Synechocystis sp. PCC 6803 End	PCC 11901 Start	PCC 11901 End	E-value	Bit Score
sp|P74572|P5CR_SYNY3	WP_138073513.1	63.433	268	96	1	1	266	1	268	1.11e-113	324
sp|P74572|P5CR_SYNY3	WP_138072082.1	33.898	59	37	1	197	253	1	59	0.13	28.9
sp|P74572|P5CR_SYNY3	WP_138073929.1	30.769	39	27	0	2	40	3	41	0.23	29.3
sp|P74572|P5CR_SYNY3	WP_030008130.1	33.333	33	22	0	212	244	72	104	0.80	26.9
sll1561	P74275	proline oxidase	putA	putA	Proline biosynthesis	Amino acid biosynthesis	Soluble proteins	0.9315982	110.0	0.0
BLAST Output	PCC 11901 Accession	Percentage Identity	Alignment Length	Mismatches	Gap Open	Synechocystis sp. PCC 6803 Start	Synechocystis sp. PCC 6803 End	PCC 11901 Start	PCC 11901 End	E-value	Bit Score
tr|P74275|P74275_SYNY3	WP_168191138.1	71.116	1004	271	4	5	989	6	1009	0.0	1473
tr|P74275|P74275_SYNY3	WP_138071828.1	28.924	446	305	5	516	959	3	438	1.07e-50	182
Arginine biosynthesis/degradation
sll1883	P74122	arginine biosynthesis bifunctional protein ArgJ	argJ	argJ	Arginine biosynthesis	Amino acid biosynthesis	Soluble proteins	0.897449017	43.3	0.0
BLAST Output	PCC 11901 Accession	Percentage Identity	Alignment Length	Mismatches	Gap Open	Synechocystis sp. PCC 6803 Start	Synechocystis sp. PCC 6803 End	PCC 11901 Start	PCC 11901 End	E-value	Bit Score
sp|P74122|ARGJ_SYNY3	WP_138073084.1	74.396	414	105	1	1	413	1	414	0.0	610
sp|P74122|ARGJ_SYNY3	WP_138072416.1	39.535	43	21	3	318	359	231	269	0.67	28.5
slr1898	P73326	N-acetylglutamate kinase	argB	argB	Arginine biosynthesis	Amino acid biosynthesis	Soluble proteins	1.0	31.5	0.0
BLAST Output	PCC 11901 Accession	Percentage Identity	Alignment Length	Mismatches	Gap Open	Synechocystis sp. PCC 6803 Start	Synechocystis sp. PCC 6803 End	PCC 11901 Start	PCC 11901 End	E-value	Bit Score
sp|P73326|ARGB_SYNY3	WP_012308112.1	76.207	290	69	0	6	295	4	293	3.66e-168	465
sp|P73326|ARGB_SYNY3	WP_012307393.1	30.252	119	67	6	171	277	129	243	0.060	31.2
sll0080	P54899	N-acetyl-gamma-glutamyl-phosphate reductase	argC	argC	Arginine biosynthesis	Amino acid biosynthesis	Soluble proteins	0.908937194	38.2	0.0
BLAST Output	PCC 11901 Accession	Percentage Identity	Alignment Length	Mismatches	Gap Open	Synechocystis sp. PCC 6803 Start	Synechocystis sp. PCC 6803 End	PCC 11901 Start	PCC 11901 End	E-value	Bit Score
sp|P54899|ARGC_SYNY3	WP_062435191.1	77.937	349	77	0	3	351	4	352	0.0	583
sp|P54899|ARGC_SYNY3	WP_138073161.1	31.429	105	61	4	7	108	6	102	0.004	35.4
sp|P54899|ARGC_SYNY3	WP_138073196.1	32.558	43	29	0	198	240	276	318	0.23	29.6
sp|P54899|ARGC_SYNY3	WP_065715968.1	37.736	53	30	2	1	52	1	51	0.35	28.9
sp|P54899|ARGC_SYNY3	WP_030006919.1	31.250	32	22	0	134	165	84	115	0.36	28.5
sp|P54899|ARGC_SYNY3	WP_012306378.1	32.692	52	33	1	58	107	101	152	0.99	27.7
slr1022	P73133	N-acetylornithine aminotransferase	argD	argD, dtu	Biotin	Biosynthesis of cofactors, prosthetic groups, and carriers
BLAST Output	PCC 11901 Accession	Percentage Identity	Alignment Length	Mismatches	Gap Open	Synechocystis sp. PCC 6803 Start	Synechocystis sp. PCC 6803 End	PCC 11901 Start	PCC 11901 End	E-value	Bit Score
sp|P73133|ARGD_SYNY3	WP_138072266.1	76.225	408	96	1	21	428	10	416	0.0	667
sp|P73133|ARGD_SYNY3	WP_065711924.1	30.714	420	245	8	41	425	51	459	2.35e-53	181
sp|P73133|ARGD_SYNY3	WP_030007293.1	27.525	396	224	14	37	396	34	402	8.66e-29	114
sp|P73133|ARGD_SYNY3	WP_138073538.1	29.000	100	54	7	192	283	856	946	0.23	30.4
sll0902	Q55497	ornithine carbamoyltransferase	argF	argF	Arginine biosynthesis	Amino acid biosynthesis	Soluble proteins	0.90670794	33.6	0.0
BLAST Output	PCC 11901 Accession	Percentage Identity	Alignment Length	Mismatches	Gap Open	Synechocystis sp. PCC 6803 Start	Synechocystis sp. PCC 6803 End	PCC 11901 Start	PCC 11901 End	E-value	Bit Score
sp|Q55497|OTC_SYNY3	WP_012306303.1	72.549	306	84	0	3	308	1	306	1.35e-173	479
sp|Q55497|OTC_SYNY3	WP_181445658.1	28.173	323	192	13	9	301	15	327	1.93e-18	80.9
sp|Q55497|OTC_SYNY3	WP_138072474.1	42.857	35	20	0	140	174	180	214	0.27	29.3
slr0585	P77973	argininosuccinate synthetase	argG	argG	Arginine biosynthesis	Amino acid biosynthesis	Soluble proteins	1.0	44.5	0.0
BLAST Output	PCC 11901 Accession	Percentage Identity	Alignment Length	Mismatches	Gap Open	Synechocystis sp. PCC 6803 Start	Synechocystis sp. PCC 6803 End	PCC 11901 Start	PCC 11901 End	E-value	Bit Score
sp|P77973|ASSY_SYNY3	WP_030007671.1	75.758	396	96	0	1	396	1	396	0.0	646
sp|P77973|ASSY_SYNY3	WP_065715962.1	37.500	40	23	2	206	244	25	63	0.88	26.9
slr1133	P73257	L-argininosuccinate lyase	argH	argH	Arginine biosynthesis	Amino acid biosynthesis	Soluble proteins	0.895394205	50.9	0.0
BLAST Output	PCC 11901 Accession	Percentage Identity	Alignment Length	Mismatches	Gap Open	Synechocystis sp. PCC 6803 Start	Synechocystis sp. PCC 6803 End	PCC 11901 Start	PCC 11901 End	E-value	Bit Score
sp|P73257|ARLY_SYNY3	WP_138071486.1	80.525	457	89	0	3	459	5	461	0.0	770
sp|P73257|ARLY_SYNY3	WP_012308248.1	23.364	321	215	10	93	397	77	382	4.91e-08	51.2
sp|P73257|ARLY_SYNY3	WP_138073564.1	22.727	396	258	13	47	409	61	441	0.001	37.4
sp|P73257|ARLY_SYNY3	WP_138071774.1	30.909	55	33	1	28	82	61	110	0.004	35.0
sp|P73257|ARLY_SYNY3	WP_030007761.1	40.476	42	23	1	93	132	306	347	0.12	31.2
sll1498	P74587	carbamoyl-phosphate synthase small chain	carA	pyrA, carA	Carbomyl-P metabolism	Energy Metabolism	Soluble proteins	0.906927405	46.5	0.0
BLAST Output	PCC 11901 Accession	Percentage Identity	Alignment Length	Mismatches	Gap Open	Synechocystis sp. PCC 6803 Start	Synechocystis sp. PCC 6803 End	PCC 11901 Start	PCC 11901 End	E-value	Bit Score
sp|P74587|CARA_SYNY3	WP_138071502.1	76.316	380	87	2	1	379	1	378	0.0	601
sp|P74587|CARA_SYNY3	WP_030007514.1	29.787	141	86	6	227	357	41	178	3.06e-11	58.9
sp|P74587|CARA_SYNY3	WP_173867208.1	29.255	188	114	8	197	372	15	195	4.31e-09	54.3
sll0370	Q55756	carbamoyl-phosphate synthase, pyrimidine-specific, large chain	carB	carB, pyrA	Carbomyl-P metabolism	Energy Metabolism	Soluble proteins	0.901538487	121.5	0.0
BLAST Output	PCC 11901 Accession	Percentage Identity	Alignment Length	Mismatches	Gap Open	Synechocystis sp. PCC 6803 Start	Synechocystis sp. PCC 6803 End	PCC 11901 Start	PCC 11901 End	E-value	Bit Score
sp|Q55756|CARB_SYNY3	WP_030007634.1	83.426	1080	179	0	1	1080	1	1080	0.0	1898
sp|Q55756|CARB_SYNY3	WP_012307729.1	25.333	225	133	7	665	869	100	309	3.82e-10	59.7
sp|Q55756|CARB_SYNY3	WP_012307729.1	22.408	299	205	10	53	341	49	330	1.95e-09	57.4
sp|Q55756|CARB_SYNY3	WP_030006701.1	23.529	306	191	12	8	304	7	278	1.51e-06	48.1
sp|Q55756|CARB_SYNY3	WP_030006701.1	21.023	176	132	3	681	853	107	278	4.34e-06	46.6
sp|Q55756|CARB_SYNY3	WP_138071383.1	30.000	50	35	0	122	171	213	262	0.022	35.0
sp|Q55756|CARB_SYNY3	WP_138073549.1	31.429	70	38	3	106	170	487	551	0.10	32.7
sp|Q55756|CARB_SYNY3	WP_099238239.1	28.571	56	40	0	846	901	135	190	0.57	30.4
sll1336	P74535	hypothetical protein	agrE		Random proteins (Hypothetical)	Random proteins (Hypothetical)	Soluble proteins	0.890270649	78.3	0.0
BLAST Output	PCC 11901 Accession	Percentage Identity	Alignment Length	Mismatches	Gap Open	Synechocystis sp. PCC 6803 Start	Synechocystis sp. PCC 6803 End	PCC 11901 Start	PCC 11901 End	E-value	Bit Score
tr|P74535|P74535_SYNY3	WP_138072218.1	71.875	704	192	3	1	701	1	701	0.0	1074
tr|P74535|P74535_SYNY3	WP_138073659.1	31.481	54	37	0	238	291	15	68	0.12	31.6
tr|P74535|P74535_SYNY3	WP_138071818.1	37.838	37	21	1	160	196	295	329	0.75	29.3
slr1312	P72587	arginine decarboxylase	speA	speA, adc1, speA1, adc	Arginine breakdown	Energy Metabolism	Unknown	0.683077859	74.4	0.0
BLAST Output	PCC 11901 Accession	Percentage Identity	Alignment Length	Mismatches	Gap Open	Synechocystis sp. PCC 6803 Start	Synechocystis sp. PCC 6803 End	PCC 11901 Start	PCC 11901 End	E-value	Bit Score
sp|P72587|SPEA2_SYNY3	WP_012307419.1	59.908	651	251	4	9	658	2	643	0.0	802
sp|P72587|SPEA2_SYNY3	WP_065709859.1	22.581	186	132	6	197	380	154	329	1.78e-07	50.4
slr0662	P74576	arginine decarboxylase	speA	speA, adc2, adc	Arginine breakdown	Energy Metabolism	Unknown	0.609280337	78.2	0.0
BLAST Output	PCC 11901 Accession	Percentage Identity	Alignment Length	Mismatches	Gap Open	Synechocystis sp. PCC 6803 Start	Synechocystis sp. PCC 6803 End	PCC 11901 Start	PCC 11901 End	E-value	Bit Score
sp|P74576|SPEA1_SYNY3	WP_012307419.1	63.524	647	218	5	42	686	13	643	0.0	859
sp|P74576|SPEA1_SYNY3	WP_065709859.1	27.206	136	92	2	266	401	201	329	8.05e-08	51.6
sp|P74576|SPEA1_SYNY3	WP_071932318.1	26.027	73	52	2	594	665	8	79	0.29	28.5
sll0228	P72703	arginase	speB1	bcp, speB1	Arginine breakdown	Energy Metabolism	Soluble proteins	0.915240046	33.4	0.0
BLAST Output	PCC 11901 Accession	Percentage Identity	Alignment Length	Mismatches	Gap Open	Synechocystis sp. PCC 6803 Start	Synechocystis sp. PCC 6803 End	PCC 11901 Start	PCC 11901 End	E-value	Bit Score
sp|P72703|SPEB1_SYNY3	WP_138072951.1	59.794	291	117	0	12	302	7	297	5.72e-136	384
sp|P72703|SPEB1_SYNY3	WP_065714373.1	23.843	281	197	7	9	276	63	339	7.34e-18	79.7
sp|P72703|SPEB1_SYNY3	WP_138071760.1	28.750	80	50	2	110	185	220	296	0.46	28.5
sll1077	P73270	agmatinase	speB2	speB2, speB, sll1077	Arginine breakdown	Energy Metabolism	Soluble proteins	0.657302191	42.9	0.0
BLAST Output	PCC 11901 Accession	Percentage Identity	Alignment Length	Mismatches	Gap Open	Synechocystis sp. PCC 6803 Start	Synechocystis sp. PCC 6803 End	PCC 11901 Start	PCC 11901 End	E-value	Bit Score
sp|P73270|SPEB2_SYNY3	WP_065714373.1	88.946	389	43	0	1	389	1	389	0.0	737
sp|P73270|SPEB2_SYNY3	WP_138072951.1	27.483	302	176	13	78	361	16	292	5.75e-20	85.9
sp|P73270|SPEB2_SYNY3	WP_012306860.1	33.333	69	37	3	260	321	6	72	0.064	29.3
Aspartate biosynthesis/cyanophycin biosynthesis/degradation
sll0402	Q55128	aspartate aminotransferase	aspC	aat, aspC	Aspartate / glutamate exchange	Amino acid biosynthesis	Soluble proteins	0.797687008	42.3	0.0
BLAST Output	PCC 11901 Accession	Percentage Identity	Alignment Length	Mismatches	Gap Open	Synechocystis sp. PCC 6803 Start	Synechocystis sp. PCC 6803 End	PCC 11901 Start	PCC 11901 End	E-value	Bit Score
sp|Q55128|AAT_SYNY3	WP_138072499.1	65.039	389	135	1	1	389	1	388	0.0	533
sp|Q55128|AAT_SYNY3	WP_138073639.1	26.854	391	262	12	5	383	10	388	3.27e-36	133
sp|Q55128|AAT_SYNY3	WP_138072238.1	29.000	400	259	14	1	386	1	389	9.83e-35	129
sp|Q55128|AAT_SYNY3	WP_138072497.1	27.309	249	157	9	61	300	57	290	6.02e-12	62.8
sp|Q55128|AAT_SYNY3	WP_030006294.1	24.646	353	208	12	45	359	49	381	1.70e-10	58.5
sp|Q55128|AAT_SYNY3	WP_138072180.1	22.695	423	248	16	23	388	21	421	2.36e-06	45.8
sp|Q55128|AAT_SYNY3	WP_138073532.1	29.032	124	78	5	82	203	43	158	4.08e-05	41.6
sp|Q55128|AAT_SYNY3	WP_138073095.1	24.167	120	78	5	94	206	81	194	0.49	28.9
slr0036	Q55453	aspartate aminotransferase	aspC	aat, aspC	Aspartate / glutamate exchange	Amino acid biosynthesis
BLAST Output	PCC 11901 Accession	Percentage Identity	Alignment Length	Mismatches	Gap Open	Synechocystis sp. PCC 6803 Start	Synechocystis sp. PCC 6803 End	PCC 11901 Start	PCC 11901 End	E-value	Bit Score
tr|Q55453|Q55453_SYNY3	WP_138072499.1	31.215	362	235	10	33	388	34	387	8.22e-48	164
tr|Q55453|Q55453_SYNY3	WP_138073639.1	24.118	340	246	7	32	365	38	371	8.33e-25	101
tr|Q55453|Q55453_SYNY3	WP_138072238.1	24.599	374	248	12	7	365	15	369	1.55e-19	85.9
tr|Q55453|Q55453_SYNY3	WP_138072497.1	25.882	255	170	10	65	311	60	303	2.07e-09	55.1
tr|Q55453|Q55453_SYNY3	WP_030006294.1	24.569	232	148	6	153	365	167	390	5.01e-09	53.9
tr|Q55453|Q55453_SYNY3	WP_138073095.1	27.273	143	89	6	87	220	73	209	5.54e-06	44.7
tr|Q55453|Q55453_SYNY3	WP_138073532.1	29.213	89	56	2	114	201	76	158	4.45e-05	41.6
tr|Q55453|Q55453_SYNY3	WP_138073538.1	23.774	265	186	8	49	306	760	1015	2.44e-04	39.7
tr|Q55453|Q55453_SYNY3	WP_138072180.1	22.956	318	208	13	62	354	76	381	0.030	32.7
tr|Q55453|Q55453_SYNY3	WP_030006711.1	52.632	19	9	0	311	329	24	42	0.70	28.1
slr2002	P73833	cyanophycin synthetase	cphA	cphA	Cyanophycin biosynthesis/degradation	Other Categories	Unknown	0.446915132	94.6	0.0
BLAST Output	PCC 11901 Accession	Percentage Identity	Alignment Length	Mismatches	Gap Open	Synechocystis sp. PCC 6803 Start	Synechocystis sp. PCC 6803 End	PCC 11901 Start	PCC 11901 End	E-value	Bit Score
sp|P73833|CPHA_SYNY3	WP_138071383.1	75.890	871	210	0	1	871	1	871	0.0	1333
sp|P73833|CPHA_SYNY3	WP_138073741.1	24.679	389	247	15	471	843	93	451	7.09e-10	58.5
sp|P73833|CPHA_SYNY3	WP_138072885.1	27.184	206	122	9	479	668	42	235	2.52e-07	50.4
sp|P73833|CPHA_SYNY3	WP_138071748.1	31.757	148	81	6	488	631	106	237	3.61e-07	50.1
sp|P73833|CPHA_SYNY3	WP_012306313.1	24.907	269	129	12	219	487	99	294	1.22e-05	44.7
sp|P73833|CPHA_SYNY3	WP_138072357.1	25.521	192	99	8	475	635	25	203	0.002	38.1
sp|P73833|CPHA_SYNY3	WP_030007634.1	26.374	91	62	2	213	301	122	209	0.017	35.0
sp|P73833|CPHA_SYNY3	WP_030007634.1	27.068	133	85	4	213	336	675	804	0.11	32.3
sp|P73833|CPHA_SYNY3	WP_012307729.1	29.474	95	61	3	219	308	116	209	0.19	31.6
sp|P73833|CPHA_SYNY3	WP_030008311.1	53.846	26	10	1	489	512	6	31	0.75	29.3
slr2001	P73832	cyanophycinase	cphB	cphB, pepE	Cyanophycin biosynthesis/degradation	Other Categories	Soluble proteins	0.912573889	29.4	0.0
BLAST Output	PCC 11901 Accession	Percentage Identity	Alignment Length	Mismatches	Gap Open	Synechocystis sp. PCC 6803 Start	Synechocystis sp. PCC 6803 End	PCC 11901 Start	PCC 11901 End	E-value	Bit Score
sp|P73832|CPHB_SYNY3	WP_012308002.1	69.084	262	81	0	4	265	12	273	4.57e-137	384
sll0422	P74383	asparaginase	ladC	sll0422	Unknown Proteins	Unknown Proteins	Soluble proteins	0.898363223	34.9	0.0
BLAST Output	PCC 11901 Accession	Percentage Identity	Alignment Length	Mismatches	Gap Open	Synechocystis sp. PCC 6803 Start	Synechocystis sp. PCC 6803 End	PCC 11901 Start	PCC 11901 End	E-value	Bit Score
sp|P74383|ASGX_SYNY3	WP_138072835.1	70.234	299	85	2	3	300	5	300	2.55e-148	416
Lysine biosynthesis
slr0657	P74569	aspartate kinase	lysC	lysC	Lysine biosynthesis	Amino acid biosynthesis	Soluble proteins	0.892379203	63.5	0.0
BLAST Output	PCC 11901 Accession	Percentage Identity	Alignment Length	Mismatches	Gap Open	Synechocystis sp. PCC 6803 Start	Synechocystis sp. PCC 6803 End	PCC 11901 Start	PCC 11901 End	E-value	Bit Score
tr|P74569|P74569_SYNY3	WP_138073156.1	68.760	605	183	3	1	600	1	604	0.0	785
tr|P74569|P74569_SYNY3	WP_012307393.1	30.189	53	37	0	153	205	146	198	0.013	34.7
tr|P74569|P74569_SYNY3	WP_012306580.1	25.325	154	92	4	81	234	85	215	0.28	30.0
slr0549	Q55512	aspartate beta-semialdehyde dehydrogenese	asd	asd	Lysine biosynthesis	Amino acid biosynthesis	Soluble proteins	0.889463376	29.5	0.0
BLAST Output	PCC 11901 Accession	Percentage Identity	Alignment Length	Mismatches	Gap Open	Synechocystis sp. PCC 6803 Start	Synechocystis sp. PCC 6803 End	PCC 11901 Start	PCC 11901 End	E-value	Bit Score
sp|Q55512|DHAS_SYNY3	WP_138073161.1	75.740	338	82	0	1	338	1	338	0.0	527
sp|Q55512|DHAS_SYNY3	WP_062435191.1	41.463	41	22	1	5	45	7	45	0.15	30.0
slr0550	Q55513	dihydrodipicolinate synthase	dapA	dapA	Lysine biosynthesis	Amino acid biosynthesis
BLAST Output	PCC 11901 Accession	Percentage Identity	Alignment Length	Mismatches	Gap Open	Synechocystis sp. PCC 6803 Start	Synechocystis sp. PCC 6803 End	PCC 11901 Start	PCC 11901 End	E-value	Bit Score
sp|Q55513|DAPA_SYNY3	WP_030006494.1	66.216	296	100	0	5	300	1	296	1.09e-145	408
sll1058	P72642	dihydrodipicolinate reductase	dapB	dapB	Lysine biosynthesis	Amino acid biosynthesis	Soluble proteins	0.715738009	29.1	0.0
BLAST Output	PCC 11901 Accession	Percentage Identity	Alignment Length	Mismatches	Gap Open	Synechocystis sp. PCC 6803 Start	Synechocystis sp. PCC 6803 End	PCC 11901 Start	PCC 11901 End	E-value	Bit Score
sp|P72642|DAPB_SYNY3	WP_138072889.1	73.091	275	74	0	1	275	1	275	9.73e-152	421
sll0480	Q55828	probable aminotransferase	dapL		Other	Other Categories	Soluble proteins	0.895996859	45.1	0.0
BLAST Output	PCC 11901 Accession	Percentage Identity	Alignment Length	Mismatches	Gap Open	Synechocystis sp. PCC 6803 Start	Synechocystis sp. PCC 6803 End	PCC 11901 Start	PCC 11901 End	E-value	Bit Score
sp|Q55828|DAPAT_SYNY3	WP_030006294.1	81.220	410	77	0	1	410	1	410	0.0	709
sp|Q55828|DAPAT_SYNY3	WP_138073639.1	28.767	365	220	11	36	390	37	371	1.11e-29	115
sp|Q55828|DAPAT_SYNY3	WP_138072238.1	27.720	386	240	12	36	410	32	389	2.29e-27	108
sp|Q55828|DAPAT_SYNY3	WP_138072499.1	23.276	348	233	9	72	410	63	385	1.63e-12	65.1
sp|Q55828|DAPAT_SYNY3	WP_138072180.1	23.421	380	213	18	72	410	77	419	8.58e-06	43.9
sp|Q55828|DAPAT_SYNY3	WP_138072497.1	22.843	197	131	10	74	262	60	243	0.004	35.4
sll0006	Q55679	putative aminotransferase		aat, aspC	Lysine biosynthesis	Amino acid biosynthesis	Soluble proteins	0.90481552	44.0	0.0
BLAST Output	PCC 11901 Accession	Percentage Identity	Alignment Length	Mismatches	Gap Open	Synechocystis sp. PCC 6803 Start	Synechocystis sp. PCC 6803 End	PCC 11901 Start	PCC 11901 End	E-value	Bit Score
tr|Q55679|Q55679_SYNY3	WP_138073639.1	72.265	393	109	0	1	393	1	393	0.0	606
tr|Q55679|Q55679_SYNY3	WP_138072238.1	37.435	382	236	2	9	387	4	385	5.85e-90	273
tr|Q55679|Q55679_SYNY3	WP_030006294.1	27.822	381	239	10	37	389	36	408	3.25e-35	130
tr|Q55679|Q55679_SYNY3	WP_138072499.1	26.273	373	260	8	27	388	21	389	1.31e-34	128
tr|Q55679|Q55679_SYNY3	WP_138072180.1	23.971	413	239	20	23	386	28	414	1.85e-08	52.4
tr|Q55679|Q55679_SYNY3	WP_138072497.1	29.412	136	83	5	172	305	166	290	9.85e-08	50.1
slr1665	P74667	diaminopimelate epimerase	dapF	dapF	Lysine biosynthesis	Amino acid biosynthesis	Soluble proteins	0.654597388	30.1	0.0
BLAST Output	PCC 11901 Accession	Percentage Identity	Alignment Length	Mismatches	Gap Open	Synechocystis sp. PCC 6803 Start	Synechocystis sp. PCC 6803 End	PCC 11901 Start	PCC 11901 End	E-value	Bit Score
sp|P74667|DAPF_SYNY3	WP_138073358.1	70.819	281	80	1	1	279	1	281	5.72e-146	407
sp|P74667|DAPF_SYNY3	WP_138073103.1	29.464	112	55	5	162	263	274	371	0.093	30.4
sp|P74667|DAPF_SYNY3	WP_012305681.1	26.042	96	60	3	162	254	252	339	0.14	30.0
sp|P74667|DAPF_SYNY3	WP_138072301.1	27.679	112	57	5	162	263	264	361	0.45	28.5
sp|P74667|DAPF_SYNY3	WP_012306566.1	27.778	90	47	4	3	92	219	290	0.74	27.7
sll0504	Q55484	diaminopimelate decarboxylase	lysA	lysA	Lysine biosynthesis	Amino acid biosynthesis	Soluble proteins	0.906158805	50.8	0.0
BLAST Output	PCC 11901 Accession	Percentage Identity	Alignment Length	Mismatches	Gap Open	Synechocystis sp. PCC 6803 Start	Synechocystis sp. PCC 6803 End	PCC 11901 Start	PCC 11901 End	E-value	Bit Score
sp|Q55484|DCDA_SYNY3	WP_065709859.1	64.454	467	158	1	1	467	1	459	0.0	619
sp|Q55484|DCDA_SYNY3	WP_012307419.1	29.655	145	95	3	209	346	231	375	5.51e-11	61.2
sp|Q55484|DCDA_SYNY3	WP_138073759.1	27.941	68	46	1	374	441	106	170	0.12	30.4
sp|Q55484|DCDA_SYNY3	WP_138073880.1	45.455	33	17	1	215	246	115	147	0.35	29.3
sp|Q55484|DCDA_SYNY3	WP_138072226.1	28.169	71	49	1	240	310	130	198	0.47	29.3
sll1683	P72774	lysine decarboxylase	cad	cad, speC	Arginine breakdown	Energy Metabolism	Soluble proteins	0.655011026	51.8	0.0
BLAST Output	PCC 11901 Accession	Percentage Identity	Alignment Length	Mismatches	Gap Open	Synechocystis sp. PCC 6803 Start	Synechocystis sp. PCC 6803 End	PCC 11901 Start	PCC 11901 End	E-value	Bit Score
tr|P72774|P72774_SYNY3	WP_138073095.1	49.375	480	236	3	10	483	3	481	2.27e-164	470
tr|P72774|P72774_SYNY3	WP_138073639.1	24.260	169	104	8	92	247	105	262	0.087	31.6
tr|P72774|P72774_SYNY3	WP_138072218.1	44.444	36	15	2	24	59	83	113	0.23	30.4
tr|P72774|P72774_SYNY3	WP_138072853.1	30.263	76	47	2	371	440	403	478	0.98	28.1
Threonine biosynthesis
sll0455	P52986	homoserine dehydrogenase	thrA	thrA, hom	Threonine biosynthesis	Amino acid biosynthesis	Soluble proteins	0.882184628	45.5	0.0
BLAST Output	PCC 11901 Accession	Percentage Identity	Alignment Length	Mismatches	Gap Open	Synechocystis sp. PCC 6803 Start	Synechocystis sp. PCC 6803 End	PCC 11901 Start	PCC 11901 End	E-value	Bit Score
sp|P52986|DHOM_SYNY3	WP_030006628.1	69.907	432	129	1	1	432	1	431	0.0	583
sp|P52986|DHOM_SYNY3	WP_138072114.1	26.374	91	58	3	17	98	115	205	0.44	28.9
sp|P52986|DHOM_SYNY3	WP_138071545.1	38.235	34	21	0	349	382	110	143	0.87	28.1
sp|P52986|DHOM_SYNY3	WP_138071694.1	29.487	78	50	3	119	193	110	185	0.92	28.5
sp|P52986|DHOM_SYNY3	WP_138072373.1	31.481	54	29	2	328	381	33	78	0.94	28.1
sll1760	P73646	homoserine kinase	thrB	thrB	Threonine biosynthesis	Amino acid biosynthesis	Soluble proteins	0.904383223	32.4	0.0
BLAST Output	PCC 11901 Accession	Percentage Identity	Alignment Length	Mismatches	Gap Open	Synechocystis sp. PCC 6803 Start	Synechocystis sp. PCC 6803 End	PCC 11901 Start	PCC 11901 End	E-value	Bit Score
sp|P73646|KHSE_SYNY3	WP_138072053.1	53.947	304	138	1	1	302	1	304	1.69e-111	322
sp|P73646|KHSE_SYNY3	WP_138071396.1	22.015	268	169	11	26	272	36	284	0.004	34.7
sp|P73646|KHSE_SYNY3	WP_138072023.1	32.692	52	35	0	64	115	17	68	0.88	25.8
sll1172	P74193	threonine synthase	thrC	thrC	Threonine biosynthesis	Amino acid biosynthesis	Soluble proteins	0.880171398	40.4	0.0
BLAST Output	PCC 11901 Accession	Percentage Identity	Alignment Length	Mismatches	Gap Open	Synechocystis sp. PCC 6803 Start	Synechocystis sp. PCC 6803 End	PCC 11901 Start	PCC 11901 End	E-value	Bit Score
sp|P74193|THRC_SYNY3	WP_045442698.1	75.482	363	88	1	20	382	8	369	0.0	540
sp|P74193|THRC_SYNY3	WP_012305920.1	34.783	345	200	12	34	364	71	404	1.34e-51	174
sp|P74193|THRC_SYNY3	WP_065716511.1	31.973	147	95	4	60	204	20	163	1.11e-10	59.3
sp|P74193|THRC_SYNY3	WP_012305882.1	27.545	167	96	6	54	203	7	165	6.63e-06	43.9
sp|P74193|THRC_SYNY3	WP_062433171.1	30.556	108	68	3	59	162	12	116	1.22e-05	43.1
sp|P74193|THRC_SYNY3	WP_168191118.1	21.534	339	213	11	61	353	72	403	0.002	36.2
sll1688	P73711	threonine synthase	thrC	thrC, sll1688	Threonine biosynthesis	Amino acid biosynthesis	Soluble proteins	0.921761914	47.0	0.0
BLAST Output	PCC 11901 Accession	Percentage Identity	Alignment Length	Mismatches	Gap Open	Synechocystis sp. PCC 6803 Start	Synechocystis sp. PCC 6803 End	PCC 11901 Start	PCC 11901 End	E-value	Bit Score
tr|P73711|P73711_SYNY3	WP_012305920.1	82.057	418	74	1	16	433	19	435	0.0	714
tr|P73711|P73711_SYNY3	WP_045442698.1	35.734	361	210	13	64	417	22	367	3.74e-45	157
tr|P73711|P73711_SYNY3	WP_168191118.1	21.289	357	219	14	89	400	72	411	0.017	33.5
tr|P73711|P73711_SYNY3	WP_138072590.1	27.273	66	36	2	201	259	75	135	1.00	28.1
Methionine biosynthesis
sll1234	P74008	adenosylhomocysteinase	ahcY	ahcY, sll1234	Unknown Proteins	Unknown Proteins	Soluble proteins	0.908116567	46.2	0.0
BLAST Output	PCC 11901 Accession	Percentage Identity	Alignment Length	Mismatches	Gap Open	Synechocystis sp. PCC 6803 Start	Synechocystis sp. PCC 6803 End	PCC 11901 Start	PCC 11901 End	E-value	Bit Score
sp|P74008|SAHH_SYNY3	WP_065711043.1	39.686	446	240	8	1	419	1	444	5.41e-87	269
sp|P74008|SAHH_SYNY3	WP_012306898.1	35.484	62	39	1	211	271	14	75	0.001	37.0
sp|P74008|SAHH_SYNY3	WP_138072072.1	24.038	104	73	2	130	233	282	379	0.17	30.4
sp|P74008|SAHH_SYNY3	WP_012307864.1	30.612	49	28	1	205	247	3	51	0.74	28.1
slr0212	Q55786	5-methyltetrahydrofolate--homocysteine methyltransferase	metH	metH	Methionine biosynthesis	Amino acid biosynthesis	Soluble proteins	0.919051486	132.5	0.0
BLAST Output	PCC 11901 Accession	Percentage Identity	Alignment Length	Mismatches	Gap Open	Synechocystis sp. PCC 6803 Start	Synechocystis sp. PCC 6803 End	PCC 11901 Start	PCC 11901 End	E-value	Bit Score
sp|Q55786|METH_SYNY3	WP_138071454.1	78.828	1195	236	4	1	1194	1	1179	0.0	1992
sp|Q55786|METH_SYNY3	WP_138073604.1	20.896	134	82	2	661	789	121	235	0.42	31.2
sp|Q55786|METH_SYNY3	WP_012306879.1	40.000	25	15	0	852	876	85	109	0.98	28.1
sll0927	P72871	S-adenosylmethionine synthetase	metK	metX	Aminoacyl tRNA synthetases and tRNA modification	Transcription / Translation	Soluble proteins	0.919039892	43.9	0.0
BLAST Output	PCC 11901 Accession	Percentage Identity	Alignment Length	Mismatches	Gap Open	Synechocystis sp. PCC 6803 Start	Synechocystis sp. PCC 6803 End	PCC 11901 Start	PCC 11901 End	E-value	Bit Score
sp|P72871|METK_SYNY3	WP_065710854.1	76.087	414	99	0	7	420	1	414	0.0	679
sp|P72871|METK_SYNY3	WP_138073304.1	20.714	140	90	3	231	369	25	144	0.20	29.6
sp|P72871|METK_SYNY3	WP_012307019.1	27.778	72	44	2	204	267	47	118	0.48	29.3
Tryptophan biosynthesis
slr0738	P20170	anthranilate synthase component I	trpE	trpE	Tryptophan biosynthesis	Amino acid biosynthesis	Soluble proteins	0.887923051	57.1	0.0
BLAST Output	PCC 11901 Accession	Percentage Identity	Alignment Length	Mismatches	Gap Open	Synechocystis sp. PCC 6803 Start	Synechocystis sp. PCC 6803 End	PCC 11901 Start	PCC 11901 End	E-value	Bit Score
sp|P20170|TRPE_SYNY3	WP_138072689.1	72.584	507	136	2	1	507	1	504	0.0	749
sp|P20170|TRPE_SYNY3	WP_138072961.1	41.688	391	197	6	116	504	89	450	5.87e-89	276
sp|P20170|TRPE_SYNY3	WP_138073781.1	25.899	278	188	8	231	504	192	455	2.10e-16	77.8
slr0055	Q55144	anthranilate synthase component II	trpG	trpG	Folate biosynthesis	Biosynthesis of cofactors, prosthetic groups, and carriers	Unknown	0.541525758	17.8	0.0
BLAST Output	PCC 11901 Accession	Percentage Identity	Alignment Length	Mismatches	Gap Open	Synechocystis sp. PCC 6803 Start	Synechocystis sp. PCC 6803 End	PCC 11901 Start	PCC 11901 End	E-value	Bit Score
tr|Q55144|Q55144_SYNY3	WP_030007514.1	64.815	162	57	0	1	162	34	195	5.22e-83	240
tr|Q55144|Q55144_SYNY3	WP_138071502.1	29.747	158	96	8	10	162	227	374	7.76e-11	55.8
tr|Q55144|Q55144_SYNY3	WP_173867208.1	27.273	154	109	2	6	159	45	195	3.41e-10	53.9
slr1867	P73617	anthranilate phosphoribosyltransferase	trpD	trpD, psbA3	Tryptophan biosynthesis	Amino acid biosynthesis	Soluble proteins	0.91699396	36.0	0.0
BLAST Output	PCC 11901 Accession	Percentage Identity	Alignment Length	Mismatches	Gap Open	Synechocystis sp. PCC 6803 Start	Synechocystis sp. PCC 6803 End	PCC 11901 Start	PCC 11901 End	E-value	Bit Score
sp|P73617|TRPD_SYNY3	WP_138073646.1	68.343	338	107	0	9	346	6	343	1.19e-153	432
sp|P73617|TRPD_SYNY3	WP_138073349.1	28.655	171	107	5	20	181	20	184	1.74e-06	45.8
sll0356	P74435	N-(5'-phosphoribosyl)anthranilate isomerase	trpF	trpF	Tryptophan biosynthesis	Amino acid biosynthesis
BLAST Output	PCC 11901 Accession	Percentage Identity	Alignment Length	Mismatches	Gap Open	Synechocystis sp. PCC 6803 Start	Synechocystis sp. PCC 6803 End	PCC 11901 Start	PCC 11901 End	E-value	Bit Score
sp|P74435|TRPF_SYNY3	WP_138071930.1	52.133	211	99	1	3	213	1	209	6.44e-73	217
slr0546	Q55508	indole-3-glycerol phosphate synthase	trpC	trpC	Tryptophan biosynthesis	Amino acid biosynthesis	Soluble proteins	0.737334935	32.9	0.0
BLAST Output	PCC 11901 Accession	Percentage Identity	Alignment Length	Mismatches	Gap Open	Synechocystis sp. PCC 6803 Start	Synechocystis sp. PCC 6803 End	PCC 11901 Start	PCC 11901 End	E-value	Bit Score
sp|Q55508|TRPC_SYNY3	WP_138073792.1	68.041	291	93	0	1	291	1	291	1.86e-142	399
sp|Q55508|TRPC_SYNY3	WP_099238175.1	41.935	31	18	0	20	50	13	43	0.36	28.5
sp|Q55508|TRPC_SYNY3	WP_012307249.1	32.353	68	43	1	227	294	58	122	0.39	28.5
slr0966	P77960	tryptophan synthase alpha chain	trpA	trpA	Tryptophan biosynthesis	Amino acid biosynthesis	Soluble proteins	0.856496838	28.0	0.0
BLAST Output	PCC 11901 Accession	Percentage Identity	Alignment Length	Mismatches	Gap Open	Synechocystis sp. PCC 6803 Start	Synechocystis sp. PCC 6803 End	PCC 11901 Start	PCC 11901 End	E-value	Bit Score
sp|P77960|TRPA_SYNY3	WP_012306193.1	69.697	264	80	0	1	264	1	264	2.00e-133	374
sp|P77960|TRPA_SYNY3	WP_138071960.1	35.000	60	39	0	177	236	152	211	0.002	35.0
sp|P77960|TRPA_SYNY3	WP_138073883.1	23.077	104	67	4	156	252	251	348	0.37	28.5
slr0543	Q59992	tryptophan synthase beta subunit	trpB	trpB	Tryptophan biosynthesis	Amino acid biosynthesis	Soluble proteins	0.945755609	45.0	0.0
BLAST Output	PCC 11901 Accession	Percentage Identity	Alignment Length	Mismatches	Gap Open	Synechocystis sp. PCC 6803 Start	Synechocystis sp. PCC 6803 End	PCC 11901 Start	PCC 11901 End	E-value	Bit Score
sp|Q59992|TRPB_SYNY3	WP_168191118.1	81.863	408	70	1	5	408	4	411	0.0	677
sp|Q59992|TRPB_SYNY3	WP_045442698.1	24.534	322	184	13	91	400	66	340	0.001	37.0
sp|Q59992|TRPB_SYNY3	WP_012305920.1	22.409	357	207	15	69	404	91	398	0.004	35.4
sp|Q59992|TRPB_SYNY3	WP_138072806.1	33.333	69	37	3	129	195	22	83	0.083	31.2
sp|Q59992|TRPB_SYNY3	WP_012305882.1	24.496	347	183	18	56	388	2	283	0.28	29.6
Phenylalanine and L-tyrosine biosynthesis
sll0109	Q55869	chorismate mutase	aroH	aroH	Phenylalanine/Tyrosine biosynthesis	Amino acid biosynthesis	Unknown	0.716210138	14.4	0.0
BLAST Output	PCC 11901 Accession	Percentage Identity	Alignment Length	Mismatches	Gap Open	Synechocystis sp. PCC 6803 Start	Synechocystis sp. PCC 6803 End	PCC 11901 Start	PCC 11901 End	E-value	Bit Score
tr|Q55869|Q55869_SYNY3	WP_030007771.1	70.635	126	37	0	2	127	1	126	3.11e-65	191
sll1662	P72808	probable prephenate dehydratase	pheA	pheA	Phenylalanine/Tyrosine biosynthesis	Amino acid biosynthesis	Soluble proteins	0.69880473	32.3	0.0
BLAST Output	PCC 11901 Accession	Percentage Identity	Alignment Length	Mismatches	Gap Open	Synechocystis sp. PCC 6803 Start	Synechocystis sp. PCC 6803 End	PCC 11901 Start	PCC 11901 End	E-value	Bit Score
tr|P72808|P72808_SYNY3	WP_138071381.1	48.529	272	140	0	6	277	5	276	7.04e-93	274
tr|P72808|P72808_SYNY3	WP_138073537.1	38.182	55	21	2	216	270	20	61	0.68	27.7
slr2081	P73906	prephenate dehydrogenase	tyrA	tyrA	Phenylalanine/Tyrosine biosynthesis	Amino acid biosynthesis	Unknown	0.627883582	30.2	0.0
BLAST Output	PCC 11901 Accession	Percentage Identity	Alignment Length	Mismatches	Gap Open	Synechocystis sp. PCC 6803 Start	Synechocystis sp. PCC 6803 End	PCC 11901 Start	PCC 11901 End	E-value	Bit Score
tr|P73906|P73906_SYNY3	WP_065711617.1	55.094	265	119	0	14	278	14	278	3.62e-105	304
tr|P73906|P73906_SYNY3	WP_138073324.1	25.275	182	115	7	2	174	4	173	0.011	33.1
tr|P73906|P73906_SYNY3	WP_138073280.1	46.154	39	21	0	199	237	120	158	0.26	28.9
Histidine biosynthesis
sll0900	Q55503	ATP phosphoribosyltransferase	hisG	hisG	Histidine biosynthesis	Amino acid biosynthesis	Soluble proteins	0.861478095	23.4	0.0
BLAST Output	PCC 11901 Accession	Percentage Identity	Alignment Length	Mismatches	Gap Open	Synechocystis sp. PCC 6803 Start	Synechocystis sp. PCC 6803 End	PCC 11901 Start	PCC 11901 End	E-value	Bit Score
sp|Q55503|HIS1_SYNY3	WP_012306250.1	71.429	210	60	0	1	210	1	210	3.91e-110	311
sp|Q55503|HIS1_SYNY3	WP_138073133.1	26.619	139	74	6	25	156	105	222	0.004	34.3
sp|Q55503|HIS1_SYNY3	WP_138072737.1	25.000	100	74	1	91	189	62	161	0.42	27.7
slr0608	P74755	histidine biosynthesis bifunctional protein HisIE	hisIE	hisI	Histidine biosynthesis	Amino acid biosynthesis	Unknown	0.528184833	23.9	0.0
BLAST Output	PCC 11901 Accession	Percentage Identity	Alignment Length	Mismatches	Gap Open	Synechocystis sp. PCC 6803 Start	Synechocystis sp. PCC 6803 End	PCC 11901 Start	PCC 11901 End	E-value	Bit Score
sp|P74755|HIS2_SYNY3	WP_065711609.1	74.286	210	54	0	6	215	1	210	2.54e-120	337
sp|P74755|HIS2_SYNY3	WP_138072800.1	37.838	37	23	0	158	194	42	78	0.071	30.0
sp|P74755|HIS2_SYNY3	WP_138072414.1	31.250	48	32	1	148	194	275	322	0.55	27.7
slr0652	P74561	phosphorybosilformimino-5-amino- phosphorybosil-4-imidazolecarboxamideisomerase	hisA	hisA	Histidine biosynthesis	Amino acid biosynthesis	Soluble proteins	0.875238878	27.3	0.0
BLAST Output	PCC 11901 Accession	Percentage Identity	Alignment Length	Mismatches	Gap Open	Synechocystis sp. PCC 6803 Start	Synechocystis sp. PCC 6803 End	PCC 11901 Start	PCC 11901 End	E-value	Bit Score
sp|P74561|HIS4_SYNY3	WP_138073500.1	67.729	251	81	0	1	251	1	251	9.36e-118	334
sp|P74561|HIS4_SYNY3	WP_012307249.1	31.050	219	137	4	2	210	5	219	2.64e-26	100
sp|P74561|HIS4_SYNY3	WP_138071960.1	25.000	148	97	5	98	243	94	229	0.003	34.7
sp|P74561|HIS4_SYNY3	WP_181445694.1	26.374	91	62	4	135	223	155	242	0.52	27.7
sll1893	P74106	cyclase	hisF	hisF	Histidine biosynthesis	Amino acid biosynthesis	Soluble proteins	0.891526931	28.0	0.0
BLAST Output	PCC 11901 Accession	Percentage Identity	Alignment Length	Mismatches	Gap Open	Synechocystis sp. PCC 6803 Start	Synechocystis sp. PCC 6803 End	PCC 11901 Start	PCC 11901 End	E-value	Bit Score
sp|P74106|HIS6_SYNY3	WP_012307249.1	81.008	258	49	0	3	260	2	259	1.97e-150	417
sp|P74106|HIS6_SYNY3	WP_138073500.1	30.769	208	128	5	6	208	2	198	1.47e-20	84.7
sp|P74106|HIS6_SYNY3	WP_138073875.1	33.766	77	41	2	124	200	120	186	0.002	35.4
slr0084	Q55805	amidotransferase HisH	hisH	hisH	Histidine biosynthesis	Amino acid biosynthesis
BLAST Output	PCC 11901 Accession	Percentage Identity	Alignment Length	Mismatches	Gap Open	Synechocystis sp. PCC 6803 Start	Synechocystis sp. PCC 6803 End	PCC 11901 Start	PCC 11901 End	E-value	Bit Score
sp|Q55805|HIS5_SYNY3	WP_138071529.1	68.780	205	64	0	1	205	1	205	5.95e-103	293
sp|Q55805|HIS5_SYNY3	WP_012307321.1	41.667	24	14	0	15	38	126	149	0.066	30.0
sp|Q55805|HIS5_SYNY3	WP_173867208.1	28.788	132	71	6	74	202	84	195	0.083	30.0
sp|Q55805|HIS5_SYNY3	WP_030007293.1	26.582	79	55	1	12	87	24	102	0.16	29.3
sp|Q55805|HIS5_SYNY3	WP_138073364.1	30.303	33	23	0	130	162	185	217	0.16	28.9
slr0500	P48054	imidazoleglycerol-phosphate dehydratase	hisB	hisB	Histidine biosynthesis	Amino acid biosynthesis
BLAST Output	PCC 11901 Accession	Percentage Identity	Alignment Length	Mismatches	Gap Open	Synechocystis sp. PCC 6803 Start	Synechocystis sp. PCC 6803 End	PCC 11901 Start	PCC 11901 End	E-value	Bit Score
sp|P48054|HIS7_SYNY3	WP_138073540.1	80.000	195	39	0	16	210	9	203	1.06e-119	335
sp|P48054|HIS7_SYNY3	WP_138072847.1	33.803	71	33	4	85	151	127	187	0.63	26.9
sll1958	P73807	histidinol phosphate aminotransferase	hisC	hisC	Histidine biosynthesis	Amino acid biosynthesis	Soluble proteins	0.86034744	40.7	0.0
BLAST Output	PCC 11901 Accession	Percentage Identity	Alignment Length	Mismatches	Gap Open	Synechocystis sp. PCC 6803 Start	Synechocystis sp. PCC 6803 End	PCC 11901 Start	PCC 11901 End	E-value	Bit Score
sp|P73807|HIS8_SYNY3	WP_138072497.1	29.589	365	218	13	1	333	1	358	1.31e-35	130
sp|P73807|HIS8_SYNY3	WP_138073639.1	25.667	300	196	11	21	293	33	332	1.30e-11	61.6
sp|P73807|HIS8_SYNY3	WP_138072238.1	23.276	232	157	7	71	281	85	316	0.002	36.2
sp|P73807|HIS8_SYNY3	WP_030006294.1	24.561	171	101	7	73	220	97	262	0.005	34.7
sp|P73807|HIS8_SYNY3	WP_138073580.1	27.419	62	45	0	82	143	211	272	0.26	29.3
sp|P73807|HIS8_SYNY3	WP_012306372.1	33.333	54	31	1	213	266	108	156	0.28	29.3
sll1713	P73417	histidinol-phosphate aminotransferase	hisC	hisC	Histidine biosynthesis	Amino acid biosynthesis	Unknown	0.628971001	40.7	0.0
BLAST Output	PCC 11901 Accession	Percentage Identity	Alignment Length	Mismatches	Gap Open	Synechocystis sp. PCC 6803 Start	Synechocystis sp. PCC 6803 End	PCC 11901 Start	PCC 11901 End	E-value	Bit Score
tr|P73417|P73417_SYNY3	WP_138072497.1	27.586	319	203	10	35	337	55	361	1.95e-19	85.1
tr|P73417|P73417_SYNY3	WP_138072499.1	25.595	168	115	5	133	290	159	326	5.27e-06	44.3
tr|P73417|P73417_SYNY3	WP_138073639.1	20.664	271	197	7	83	342	122	385	7.47e-05	40.8
tr|P73417|P73417_SYNY3	WP_138072180.1	30.928	97	54	4	141	230	191	281	0.020	33.1
tr|P73417|P73417_SYNY3	WP_138073200.1	24.051	158	74	9	1	124	369	514	0.29	29.3
slr1848	P73058	histidinol dehydrogenase	hisD	hisD	Histidine biosynthesis	Amino acid biosynthesis	Soluble proteins	0.9054588	46.5	0.0
BLAST Output	PCC 11901 Accession	Percentage Identity	Alignment Length	Mismatches	Gap Open	Synechocystis sp. PCC 6803 Start	Synechocystis sp. PCC 6803 End	PCC 11901 Start	PCC 11901 End	E-value	Bit Score
sp|P73058|HISX_SYNY3	WP_138073568.1	38.194	432	261	4	1	430	1	428	1.81e-94	288
sp|P73058|HISX_SYNY3	WP_138071997.1	27.027	111	74	2	5	111	524	631	0.45	29.3
slr0682	P72946	histidinol dehydrogenase	hisD	hisD	Histidine biosynthesis	Amino acid biosynthesis	Soluble proteins	0.869677504	45.1	0.0
BLAST Output	PCC 11901 Accession	Percentage Identity	Alignment Length	Mismatches	Gap Open	Synechocystis sp. PCC 6803 Start	Synechocystis sp. PCC 6803 End	PCC 11901 Start	PCC 11901 End	E-value	Bit Score
sp|P72946|HISXH_SYNY3	WP_138073568.1	36.776	397	229	5	1	375	1	397	8.64e-70	223
sp|P72946|HISXH_SYNY3	WP_138073382.1	30.159	63	36	3	254	308	540	602	0.90	28.1
Serine, glycine and cysteine biosynthesis
sll1908	P73821	D-3-phosphoglycerate dehydrogenase	hpr	serA	Unknown Proteins	Unknown Proteins	Soluble proteins	0.941777069	56.2	0.0
BLAST Output	PCC 11901 Accession	Percentage Identity	Alignment Length	Mismatches	Gap Open	Synechocystis sp. PCC 6803 Start	Synechocystis sp. PCC 6803 End	PCC 11901 Start	PCC 11901 End	E-value	Bit Score
sp|P73821|SERA_SYNY3	WP_012306867.1	78.137	526	114	1	29	554	1	525	0.0	855
sp|P73821|SERA_SYNY3	WP_138073864.1	33.206	262	154	5	81	326	60	316	1.27e-40	146
sp|P73821|SERA_SYNY3	WP_030006628.1	34.091	44	28	1	472	514	345	388	0.016	34.3
sll1559	P74281	aminotransferase	ggt	sll1559	Glycolate metabolism	Energy Metabolism	Soluble proteins	0.873675691	40.7	0.0
BLAST Output	PCC 11901 Accession	Percentage Identity	Alignment Length	Mismatches	Gap Open	Synechocystis sp. PCC 6803 Start	Synechocystis sp. PCC 6803 End	PCC 11901 Start	PCC 11901 End	E-value	Bit Score
tr|P74281|P74281_SYNY3	WP_138073193.1	67.671	365	117	1	1	365	1	364	0.0	506
tr|P74281|P74281_SYNY3	WP_138072124.1	32.370	346	222	7	5	343	23	363	1.19e-56	186
tr|P74281|P74281_SYNY3	WP_138071295.1	25.243	309	175	14	11	285	24	310	1.50e-07	49.3
slr1124	P72649	phosphoglycerate mutase	serB	gpmB, slr1124	Glycolysis	Energy Metabolism	Soluble proteins	0.740261863	49.3	0.0
BLAST Output	PCC 11901 Accession	Percentage Identity	Alignment Length	Mismatches	Gap Open	Synechocystis sp. PCC 6803 Start	Synechocystis sp. PCC 6803 End	PCC 11901 Start	PCC 11901 End	E-value	Bit Score
tr|P72649|P72649_SYNY3	WP_138071571.1	63.533	351	125	3	1	349	95	444	5.51e-159	449
tr|P72649|P72649_SYNY3	WP_138071571.1	27.650	217	146	5	132	341	4	216	1.22e-20	89.0
tr|P72649|P72649_SYNY3	WP_138073094.1	27.027	148	96	5	154	297	40	179	0.097	30.4
tr|P72649|P72649_SYNY3	WP_012308217.1	29.032	62	38	2	154	209	22	83	0.40	28.1
sll1559	P74281	aminotransferase	ggt	sll1559	Glycolate metabolism	Energy Metabolism	Soluble proteins	0.873675691	40.7	0.0
BLAST Output	PCC 11901 Accession	Percentage Identity	Alignment Length	Mismatches	Gap Open	Synechocystis sp. PCC 6803 Start	Synechocystis sp. PCC 6803 End	PCC 11901 Start	PCC 11901 End	E-value	Bit Score
tr|P74281|P74281_SYNY3	WP_138073193.1	67.671	365	117	1	1	365	1	364	0.0	506
tr|P74281|P74281_SYNY3	WP_138072124.1	32.370	346	222	7	5	343	23	363	1.19e-56	186
tr|P74281|P74281_SYNY3	WP_138071295.1	25.243	309	175	14	11	285	24	310	1.50e-07	49.3
sll1931	P77962	serine hydroxymethyltransferase	shm	glyA, shm	Glycolate metabolism	Energy Metabolism	Soluble proteins	0.906543281	46.2	0.0
BLAST Output	PCC 11901 Accession	Percentage Identity	Alignment Length	Mismatches	Gap Open	Synechocystis sp. PCC 6803 Start	Synechocystis sp. PCC 6803 End	PCC 11901 Start	PCC 11901 End	E-value	Bit Score
sp|P77962|GLYA_SYNY3	WP_065711720.1	81.030	427	81	0	1	427	1	427	0.0	726
slr1348	P74089	serine acetyltransferase	cysE	cysE, cycE	Cysteine biosynthesis	Amino acid biosynthesis	Unknown	0.531891326	27.3	0.0
BLAST Output	PCC 11901 Accession	Percentage Identity	Alignment Length	Mismatches	Gap Open	Synechocystis sp. PCC 6803 Start	Synechocystis sp. PCC 6803 End	PCC 11901 Start	PCC 11901 End	E-value	Bit Score
sp|P74089|CYSE_SYNY3	WP_065710799.1	74.194	248	59	1	1	248	1	243	2.01e-124	350
sp|P74089|CYSE_SYNY3	WP_138073298.1	29.358	109	70	4	67	168	77	185	7.52e-08	47.8
sp|P74089|CYSE_SYNY3	WP_138073759.1	25.806	93	68	1	77	168	76	168	1.30e-06	43.9
sp|P74089|CYSE_SYNY3	WP_138071492.1	33.333	93	49	3	94	173	53	145	1.08e-04	38.5
sp|P74089|CYSE_SYNY3	WP_138072383.1	25.000	132	76	3	58	168	33	162	2.34e-04	37.7
sp|P74089|CYSE_SYNY3	WP_062436083.1	34.694	49	32	0	114	162	387	435	0.004	34.7
sp|P74089|CYSE_SYNY3	WP_138073551.1	30.233	86	58	1	115	198	113	198	0.007	33.1
sp|P74089|CYSE_SYNY3	WP_084150040.1	36.170	47	30	0	122	168	151	197	0.017	32.0
sp|P74089|CYSE_SYNY3	WP_138072168.1	33.871	62	38	1	42	103	823	881	0.40	28.5
sp|P74089|CYSE_SYNY3	WP_168191151.1	31.034	29	20	0	124	152	66	94	0.46	27.7
sp|P74089|CYSE_SYNY3	WP_012306577.1	34.884	43	28	0	120	162	270	312	0.59	27.7
sp|P74089|CYSE_SYNY3	WP_138072619.1	27.273	77	53	2	70	145	312	386	0.78	27.3
slr1842	P73410	cysteine synthase	cysK	cysK	Cysteine biosynthesis	Amino acid biosynthesis	Soluble proteins	0.845339525	33.2	0.0
BLAST Output	PCC 11901 Accession	Percentage Identity	Alignment Length	Mismatches	Gap Open	Synechocystis sp. PCC 6803 Start	Synechocystis sp. PCC 6803 End	PCC 11901 Start	PCC 11901 End	E-value	Bit Score
sp|P73410|CYSK_SYNY3	WP_012305882.1	76.206	311	74	0	1	311	1	311	8.59e-163	452
sp|P73410|CYSK_SYNY3	WP_062433171.1	37.500	312	183	5	1	304	1	308	1.33e-50	167
sp|P73410|CYSK_SYNY3	WP_045442698.1	27.653	311	156	14	7	280	41	319	1.97e-09	54.3
sp|P73410|CYSK_SYNY3	WP_168191118.1	24.776	335	175	14	2	275	59	377	3.36e-07	47.8
sp|P73410|CYSK_SYNY3	WP_065716511.1	22.979	235	161	6	31	253	36	262	0.015	33.1
sp|P73410|CYSK_SYNY3	WP_138071506.1	26.415	53	37	1	21	71	73	125	0.38	28.9
sp|P73410|CYSK_SYNY3	WP_138072074.1	45.833	24	13	0	253	276	267	290	0.77	27.7
sp|P73410|CYSK_SYNY3	WP_012306070.1	21.596	213	137	7	66	271	96	285	0.96	27.3
sll0712	P72662	cysteine synthase	cysM	cysM	Cysteine biosynthesis	Amino acid biosynthesis	Soluble proteins	0.730203389	34.7	0.0
BLAST Output	PCC 11901 Accession	Percentage Identity	Alignment Length	Mismatches	Gap Open	Synechocystis sp. PCC 6803 Start	Synechocystis sp. PCC 6803 End	PCC 11901 Start	PCC 11901 End	E-value	Bit Score
tr|P72662|P72662_SYNY3	WP_062433171.1	80.308	325	64	0	1	325	1	325	0.0	514
tr|P72662|P72662_SYNY3	WP_012305882.1	35.110	319	195	5	1	315	1	311	7.46e-45	152
tr|P72662|P72662_SYNY3	WP_045442698.1	32.184	87	53	2	12	96	46	128	6.31e-04	37.4
tr|P72662|P72662_SYNY3	WP_065716511.1	27.358	212	144	6	9	219	16	218	0.017	33.1
tr|P72662|P72662_SYNY3	WP_138073787.1	35.088	57	36	1	87	143	244	299	0.15	30.0
tr|P72662|P72662_SYNY3	WP_138073733.1	50.000	26	12	1	68	92	342	367	0.19	30.0
slr0077	Q55793	cysteine desulfurase	csd	sufS, nifS	Iron-sulfur cluster biosynthesis	Amino acid biosynthesis	Soluble proteins	0.850630303	46.4	0.0
BLAST Output	PCC 11901 Accession	Percentage Identity	Alignment Length	Mismatches	Gap Open	Synechocystis sp. PCC 6803 Start	Synechocystis sp. PCC 6803 End	PCC 11901 Start	PCC 11901 End	E-value	Bit Score
sp|Q55793|CSD_SYNY3	WP_065716658.1	71.394	416	117	1	1	414	1	416	0.0	632
sp|Q55793|CSD_SYNY3	WP_138072796.1	27.665	394	249	11	30	410	5	375	1.20e-27	109
sp|Q55793|CSD_SYNY3	WP_138071295.1	25.253	396	259	16	14	400	8	375	3.44e-23	97.1
sp|Q55793|CSD_SYNY3	WP_138072935.1	22.767	347	244	7	30	372	3	329	1.62e-19	86.3
sp|Q55793|CSD_SYNY3	WP_138073193.1	26.068	234	147	9	112	333	72	291	1.04e-07	50.1
sp|Q55793|CSD_SYNY3	WP_138072124.1	23.596	89	66	2	155	241	132	220	0.018	33.5
sp|Q55793|CSD_SYNY3	WP_138072499.1	23.438	128	83	5	76	196	71	190	0.48	28.9
slr0827	P54918	alanine racemase	alr	alr, dal	Peptidoglycan biosynthesis	Cell Envelope
BLAST Output	PCC 11901 Accession	Percentage Identity	Alignment Length	Mismatches	Gap Open	Synechocystis sp. PCC 6803 Start	Synechocystis sp. PCC 6803 End	PCC 11901 Start	PCC 11901 End	E-value	Bit Score
sp|P54918|ALR_SYNY3	WP_181445670.1	65.854	369	126	0	2	370	24	392	0.0	507
slr0990	P74515	hypothetical protein	gshA	gshA	Glutathione biosynthesis	Biosynthesis of cofactors, prosthetic groups, and carriers	Unknown	0.522897859	44.0	0.0
BLAST Output	PCC 11901 Accession	Percentage Identity	Alignment Length	Mismatches	Gap Open	Synechocystis sp. PCC 6803 Start	Synechocystis sp. PCC 6803 End	PCC 11901 Start	PCC 11901 End	E-value	Bit Score
tr|P74515|P74515_SYNY3	WP_138071826.1	67.374	377	122	1	1	377	1	376	0.0	524
tr|P74515|P74515_SYNY3	WP_138073176.1	35.417	48	30	1	56	103	134	180	0.18	29.6
slr1238	P73493	glutathione synthetase	gshB	gshB	Glutathione biosynthesis	Biosynthesis of cofactors, prosthetic groups, and carriers	Soluble proteins	1.0	35.0	0.0
BLAST Output	PCC 11901 Accession	Percentage Identity	Alignment Length	Mismatches	Gap Open	Synechocystis sp. PCC 6803 Start	Synechocystis sp. PCC 6803 End	PCC 11901 Start	PCC 11901 End	E-value	Bit Score
sp|P73493|GSHB_SYNY3	WP_138073092.1	64.263	319	114	0	1	319	1	319	1.38e-156	437
sp|P73493|GSHB_SYNY3	WP_012306313.1	26.549	226	149	9	104	319	71	289	1.93e-09	54.3
sp|P73493|GSHB_SYNY3	WP_181445701.1	54.167	24	11	0	50	73	263	286	0.062	31.2
sp|P73493|GSHB_SYNY3	WP_138073014.1	37.500	40	25	0	43	82	76	115	0.17	29.6
sp|P73493|GSHB_SYNY3	WP_138071383.1	25.352	71	49	2	166	235	259	326	0.36	28.9
Iron-sulphur cluster assembly
slr0387	Q55602	cysteine desulfurase NifS	nifS1	nifS1, iscS	Iron-sulfur cluster biosynthesis	Amino acid biosynthesis	Soluble proteins	0.916323129	41.7	0.0
BLAST Output	PCC 11901 Accession	Percentage Identity	Alignment Length	Mismatches	Gap Open	Synechocystis sp. PCC 6803 Start	Synechocystis sp. PCC 6803 End	PCC 11901 Start	PCC 11901 End	E-value	Bit Score
tr|Q55602|Q55602_SYNY3	WP_138072796.1	64.042	381	133	3	1	379	1	379	7.10e-175	489
tr|Q55602|Q55602_SYNY3	WP_138072935.1	38.400	375	219	6	5	370	3	374	8.97e-79	244
tr|Q55602|Q55602_SYNY3	WP_065716658.1	29.397	398	244	16	3	375	27	412	4.45e-28	110
tr|Q55602|Q55602_SYNY3	WP_138071295.1	26.255	259	165	7	48	284	61	315	2.10e-17	79.3
tr|Q55602|Q55602_SYNY3	WP_138072124.1	26.316	190	118	7	144	314	150	336	1.07e-06	46.6
tr|Q55602|Q55602_SYNY3	WP_065711923.1	23.571	140	75	4	67	179	153	287	0.030	32.7
tr|Q55602|Q55602_SYNY3	WP_138073342.1	44.737	38	20	1	229	265	344	381	0.28	29.6
tr|Q55602|Q55602_SYNY3	WP_138072242.1	41.667	36	19	1	7	40	268	303	0.43	28.9
tr|Q55602|Q55602_SYNY3	WP_138073538.1	32.759	58	35	2	130	183	858	915	0.93	28.1
sll0704	P72676	cysteine desulfurase	nifS2	nifS2	Iron-sulfur cluster biosynthesis	Amino acid biosynthesis	Soluble proteins	0.910413804	42.5	0.0
BLAST Output	PCC 11901 Accession	Percentage Identity	Alignment Length	Mismatches	Gap Open	Synechocystis sp. PCC 6803 Start	Synechocystis sp. PCC 6803 End	PCC 11901 Start	PCC 11901 End	E-value	Bit Score
tr|P72676|P72676_SYNY3	WP_138072935.1	61.214	379	146	1	1	379	1	378	1.28e-164	463
tr|P72676|P72676_SYNY3	WP_138072796.1	41.558	385	209	7	3	382	5	378	2.69e-86	264
tr|P72676|P72676_SYNY3	WP_065716658.1	28.195	266	170	6	3	248	30	294	1.11e-19	86.7
tr|P72676|P72676_SYNY3	WP_138071295.1	22.928	362	214	16	2	324	17	352	1.10e-08	52.8
tr|P72676|P72676_SYNY3	WP_065711923.1	23.429	175	93	7	66	213	153	313	0.003	36.2
tr|P72676|P72676_SYNY3	WP_138073193.1	22.642	106	75	2	107	205	92	197	0.16	30.4
slr0077	Q55793	cysteine desulfurase	csd	sufS, nifS	Iron-sulfur cluster biosynthesis	Amino acid biosynthesis	Soluble proteins	0.850630303	46.4	0.0
BLAST Output	PCC 11901 Accession	Percentage Identity	Alignment Length	Mismatches	Gap Open	Synechocystis sp. PCC 6803 Start	Synechocystis sp. PCC 6803 End	PCC 11901 Start	PCC 11901 End	E-value	Bit Score
sp|Q55793|CSD_SYNY3	WP_065716658.1	71.394	416	117	1	1	414	1	416	0.0	632
sp|Q55793|CSD_SYNY3	WP_138072796.1	27.665	394	249	11	30	410	5	375	1.20e-27	109
sp|Q55793|CSD_SYNY3	WP_138071295.1	25.253	396	259	16	14	400	8	375	3.44e-23	97.1
sp|Q55793|CSD_SYNY3	WP_138072935.1	22.767	347	244	7	30	372	3	329	1.62e-19	86.3
sp|Q55793|CSD_SYNY3	WP_138073193.1	26.068	234	147	9	112	333	72	291	1.04e-07	50.1
sp|Q55793|CSD_SYNY3	WP_138072124.1	23.596	89	66	2	155	241	132	220	0.018	33.5
sp|Q55793|CSD_SYNY3	WP_138072499.1	23.438	128	83	5	76	196	71	190	0.48	28.9
slr1419	P74523	hypothetical protein	sufE	sufE	Iron-sulfur cluster biosynthesis	Amino acid biosynthesis	Soluble proteins	0.87395444	17.7	0.0
BLAST Output	PCC 11901 Accession	Percentage Identity	Alignment Length	Mismatches	Gap Open	Synechocystis sp. PCC 6803 Start	Synechocystis sp. PCC 6803 End	PCC 11901 Start	PCC 11901 End	E-value	Bit Score
sp|P74523|Y1419_SYNY3	WP_012306540.1	72.993	137	37	0	17	153	4	140	1.05e-72	211
sp|P74523|Y1419_SYNY3	WP_138071772.1	34.783	46	25	1	112	157	172	212	0.98	26.2
slr1417	P72731	hypothetical protein YCF57	sufA	ycf57, iscA, sufA, iscA1	Iron-sulfur cluster biosynthesis	Amino acid biosynthesis	Unknown	0.644288326	12.9	0.0
BLAST Output	PCC 11901 Accession	Percentage Identity	Alignment Length	Mismatches	Gap Open	Synechocystis sp. PCC 6803 Start	Synechocystis sp. PCC 6803 End	PCC 11901 Start	PCC 11901 End	E-value	Bit Score
sp|P72731|Y1417_SYNY3	WP_030006037.1	80.702	114	21	1	6	118	4	117	1.42e-68	198
sp|P72731|Y1417_SYNY3	WP_138073577.1	31.132	106	70	2	12	116	2	105	2.10e-15	63.5
slr0074	Q55790	ABC transporter subunit	sufB	ycf24, sufB	Iron-sulfur cluster biosynthesis	Amino acid biosynthesis	Soluble proteins	0.890666898	52.8	0.0
BLAST Output	PCC 11901 Accession	Percentage Identity	Alignment Length	Mismatches	Gap Open	Synechocystis sp. PCC 6803 Start	Synechocystis sp. PCC 6803 End	PCC 11901 Start	PCC 11901 End	E-value	Bit Score
sp|Q55790|Y074_SYNY3	WP_012307425.1	88.075	478	57	0	3	480	2	479	0.0	892
sp|Q55790|Y074_SYNY3	WP_138073471.1	23.123	333	233	9	146	467	121	441	1.14e-17	81.6
slr0075	Q55791	ABC transporter ATP-binding protein	sufC	ycf16, sufC	Iron-sulfur cluster biosynthesis	Amino acid biosynthesis	Soluble proteins	0.741743973	28.4	0.0
BLAST Output	PCC 11901 Accession	Percentage Identity	Alignment Length	Mismatches	Gap Open	Synechocystis sp. PCC 6803 Start	Synechocystis sp. PCC 6803 End	PCC 11901 Start	PCC 11901 End	E-value	Bit Score
sp|Q55791|Y075_SYNY3	WP_062434719.1	78.906	256	54	0	1	256	1	256	4.58e-149	413
sp|Q55791|Y075_SYNY3	WP_030007864.1	27.542	236	159	4	5	232	8	239	1.03e-15	71.2
sp|Q55791|Y075_SYNY3	WP_138073683.1	33.333	222	121	10	23	232	310	516	4.45e-15	70.9
sp|Q55791|Y075_SYNY3	WP_138073683.1	25.339	221	147	8	21	232	26	237	4.02e-06	43.9
sp|Q55791|Y075_SYNY3	WP_012306029.1	27.500	240	149	6	3	232	2	226	5.54e-15	70.1
sp|Q55791|Y075_SYNY3	WP_012308426.1	25.322	233	158	5	1	232	1	218	1.13e-13	65.9
sp|Q55791|Y075_SYNY3	WP_138073912.1	27.700	213	123	8	5	207	1	192	6.25e-13	62.8
sp|Q55791|Y075_SYNY3	WP_138072881.1	26.582	237	156	8	5	235	6	230	6.33e-12	61.2
sp|Q55791|Y075_SYNY3	WP_030006985.1	27.391	230	152	5	5	232	9	225	1.49e-11	59.3
sp|Q55791|Y075_SYNY3	WP_012305491.1	26.190	210	134	8	4	207	19	213	1.66e-11	59.3
sp|Q55791|Y075_SYNY3	WP_138073640.1	28.692	237	148	9	20	251	354	574	1.76e-11	60.1
sp|Q55791|Y075_SYNY3	WP_138071073.1	25.292	257	130	5	21	251	792	1012	1.84e-11	60.5
sp|Q55791|Y075_SYNY3	WP_138073727.1	29.442	197	101	8	20	207	18	185	3.10e-11	58.2
sp|Q55791|Y075_SYNY3	WP_138072772.1	25.862	232	143	6	5	216	1	223	4.45e-11	58.9
sp|Q55791|Y075_SYNY3	WP_138072772.1	37.500	56	35	0	3	58	321	376	6.50e-06	43.1
sp|Q55791|Y075_SYNY3	WP_138072772.1	29.412	85	56	2	149	233	442	522	0.006	33.9
sp|Q55791|Y075_SYNY3	WP_138072072.1	25.954	262	170	9	1	245	1	255	4.67e-11	58.9
sp|Q55791|Y075_SYNY3	WP_138072072.1	26.941	219	130	9	24	228	353	555	2.62e-09	53.5
sp|Q55791|Y075_SYNY3	WP_138073544.1	26.383	235	147	7	5	232	1	216	6.81e-11	57.4
sp|Q55791|Y075_SYNY3	WP_012307050.1	23.651	241	166	6	5	235	7	239	1.02e-10	57.0
sp|Q55791|Y075_SYNY3	WP_138073254.1	28.846	260	159	10	5	256	363	604	1.12e-10	57.8
sp|Q55791|Y075_SYNY3	WP_138072780.1	24.268	239	150	6	8	235	5	223	2.13e-10	55.8
sp|Q55791|Y075_SYNY3	WP_138072468.1	23.762	202	142	4	5	206	3	192	5.93e-10	54.7
sp|Q55791|Y075_SYNY3	WP_030007725.1	25.726	241	158	7	2	232	6	235	6.04e-10	54.7
sp|Q55791|Y075_SYNY3	WP_099238163.1	28.333	240	145	9	20	251	362	582	7.55e-10	55.5
sp|Q55791|Y075_SYNY3	WP_138073367.1	26.050	238	163	7	5	239	11	238	1.13e-09	54.3
sp|Q55791|Y075_SYNY3	WP_062436324.1	27.168	173	91	7	20	181	23	171	1.28e-09	53.5
sp|Q55791|Y075_SYNY3	WP_138073562.1	23.176	233	141	6	6	226	4	210	1.62e-09	53.9
sp|Q55791|Y075_SYNY3	WP_138073420.1	25.352	213	129	9	6	207	8	201	1.65e-09	53.5
sp|Q55791|Y075_SYNY3	WP_138071561.1	25.652	230	145	7	20	229	24	247	1.94e-09	53.9
sp|Q55791|Y075_SYNY3	WP_052349711.1	29.744	195	113	8	21	207	21	199	5.71e-09	51.6
sp|Q55791|Y075_SYNY3	WP_099239011.1	26.471	238	164	6	20	255	34	262	8.54e-09	51.6
sp|Q55791|Y075_SYNY3	WP_138072188.1	24.686	239	141	7	5	232	1	211	8.56e-09	51.6
sp|Q55791|Y075_SYNY3	WP_138072716.1	27.397	219	141	9	17	232	373	576	1.03e-08	52.0
sp|Q55791|Y075_SYNY3	WP_030007300.1	27.700	213	131	7	1	207	12	207	1.08e-08	51.2
sp|Q55791|Y075_SYNY3	WP_138072718.1	23.853	218	141	6	1	206	1	205	1.55e-08	50.4
sp|Q55791|Y075_SYNY3	WP_030006711.1	26.582	237	140	9	1	232	1	208	1.70e-08	50.1
sp|Q55791|Y075_SYNY3	WP_012307505.1	26.415	212	134	9	5	207	13	211	2.10e-08	50.1
sp|Q55791|Y075_SYNY3	WP_138071844.1	27.039	233	133	9	16	235	352	560	2.34e-08	50.8
sp|Q55791|Y075_SYNY3	WP_138073821.1	25.541	231	149	6	6	232	347	558	2.56e-08	50.8
sp|Q55791|Y075_SYNY3	WP_138073821.1	25.967	181	113	7	3	181	18	179	1.37e-06	45.4
sp|Q55791|Y075_SYNY3	WP_030005941.1	21.961	255	159	10	6	242	5	237	2.49e-07	47.4
sp|Q55791|Y075_SYNY3	WP_138072114.1	26.728	217	141	5	18	232	33	233	2.71e-07	47.4
sp|Q55791|Y075_SYNY3	WP_138073274.1	27.189	217	132	9	19	229	26	222	1.06e-06	45.1
sp|Q55791|Y075_SYNY3	WP_138071494.1	26.776	183	115	7	3	181	2	169	1.17e-06	45.1
sp|Q55791|Y075_SYNY3	WP_138073429.1	25.258	194	115	6	21	207	22	192	2.69e-06	43.9
sp|Q55791|Y075_SYNY3	WP_099238804.1	27.434	226	124	13	24	235	43	242	3.20e-06	43.9
sp|Q55791|Y075_SYNY3	WP_138072619.1	25.110	227	150	9	4	215	2	223	4.29e-06	43.9
sp|Q55791|Y075_SYNY3	WP_138072619.1	34.483	58	36	1	1	56	316	373	0.001	36.6
sp|Q55791|Y075_SYNY3	WP_138072619.1	28.986	69	46	1	148	216	445	510	0.001	36.2
sp|Q55791|Y075_SYNY3	WP_065711842.1	25.214	234	161	8	1	232	1	222	1.80e-05	41.6
sp|Q55791|Y075_SYNY3	WP_012306490.1	26.178	191	111	6	6	181	24	199	2.61e-05	41.2
sp|Q55791|Y075_SYNY3	WP_138071060.1	44.898	49	25	1	20	68	43	89	2.71e-05	40.8
sp|Q55791|Y075_SYNY3	WP_138073907.1	23.361	244	162	7	4	235	326	556	6.00e-05	40.4
sp|Q55791|Y075_SYNY3	WP_138073852.1	22.881	236	162	9	5	230	1	226	6.53e-05	39.7
sp|Q55791|Y075_SYNY3	WP_138073901.1	25.989	177	104	7	16	183	377	535	3.39e-04	38.1
sp|Q55791|Y075_SYNY3	WP_138073288.1	41.026	39	21	1	21	57	67	105	0.002	35.8
sp|Q55791|Y075_SYNY3	WP_138073659.1	22.599	177	124	5	5	181	1	164	0.004	34.7
sp|Q55791|Y075_SYNY3	WP_138073798.1	51.852	27	13	0	21	47	622	648	0.036	32.0
sp|Q55791|Y075_SYNY3	WP_138073169.1	28.571	84	55	2	60	139	416	498	0.039	31.6
sp|Q55791|Y075_SYNY3	WP_083993489.1	39.024	41	25	0	89	129	99	139	0.11	29.6
sp|Q55791|Y075_SYNY3	WP_012305858.1	27.536	69	49	1	179	247	49	116	0.91	27.3
slr0076	Q55792	hypothetical protein	sufD	sufD, sufB	Iron-sulfur cluster biosynthesis	Amino acid biosynthesis	Soluble proteins	0.8984948	50.0	0.0
BLAST Output	PCC 11901 Accession	Percentage Identity	Alignment Length	Mismatches	Gap Open	Synechocystis sp. PCC 6803 Start	Synechocystis sp. PCC 6803 End	PCC 11901 Start	PCC 11901 End	E-value	Bit Score
sp|Q55792|Y076_SYNY3	WP_138073471.1	49.237	459	214	5	1	453	6	451	2.86e-154	442
sp|Q55792|Y076_SYNY3	WP_012307425.1	21.406	313	216	10	140	437	163	460	2.43e-13	68.2
ssl2667	P74558	an assembly factor for iron-sulfur culsters	nifU	synifU, cnfU, nfuA, nifU, ssl2667	Iron-sulfur cluster biosynthesis	Amino acid biosynthesis	Soluble proteins	0.896497379	8.4	0.0
BLAST Output	PCC 11901 Accession	Percentage Identity	Alignment Length	Mismatches	Gap Open	Synechocystis sp. PCC 6803 Start	Synechocystis sp. PCC 6803 End	PCC 11901 Start	PCC 11901 End	E-value	Bit Score
tr|P74558|P74558_SYNY3	WP_012307027.1	80.263	76	15	0	1	76	3	78	2.54e-42	129
Nucleotide biosynthesis
sll0469	Q55848	ribose-phosphate pyrophosphokinase	prsA	prsA, prs	Purine ribonucleotide biosynthesis	Purines, pyrimidines, nucleosides, and nucleotides	Unknown	0.411996665	36.4	0.0
BLAST Output	PCC 11901 Accession	Percentage Identity	Alignment Length	Mismatches	Gap Open	Synechocystis sp. PCC 6803 Start	Synechocystis sp. PCC 6803 End	PCC 11901 Start	PCC 11901 End	E-value	Bit Score
sp|Q55848|KPRS_SYNY3	WP_012308319.1	81.212	330	62	0	4	333	1	330	0.0	564
sp|Q55848|KPRS_SYNY3	WP_138072606.1	30.000	70	45	3	192	260	359	425	0.081	31.2
sp|Q55848|KPRS_SYNY3	WP_138072535.1	34.545	55	35	1	225	278	357	411	0.28	29.3
sp|Q55848|KPRS_SYNY3	WP_138071632.1	36.735	49	29	1	169	215	164	212	0.65	28.1
Purine biosynthesis
sll0757	Q55621	amidophosphoribosyltransferase	purF	purF	Purine ribonucleotide biosynthesis	Purines, pyrimidines, nucleosides, and nucleotides	Soluble proteins	1.0	53.6	0.0
BLAST Output	PCC 11901 Accession	Percentage Identity	Alignment Length	Mismatches	Gap Open	Synechocystis sp. PCC 6803 Start	Synechocystis sp. PCC 6803 End	PCC 11901 Start	PCC 11901 End	E-value	Bit Score
sp|Q55621|PUR1_SYNY3	WP_138072535.1	75.368	475	114	2	23	494	14	488	0.0	730
sp|Q55621|PUR1_SYNY3	WP_030006252.1	29.752	242	150	9	29	262	2	231	7.50e-17	79.7
sp|Q55621|PUR1_SYNY3	WP_012308319.1	34.921	63	35	2	357	419	216	272	0.092	31.6
sp|Q55621|PUR1_SYNY3	WP_099240573.1	38.235	34	21	0	370	403	94	127	0.70	28.1
slr1159	P74232	glycinamide ribonucleotide synthetase	purD	purD	Purine ribonucleotide biosynthesis	Purines, pyrimidines, nucleosides, and nucleotides	Soluble proteins	0.795836399	44.0	0.0
BLAST Output	PCC 11901 Accession	Percentage Identity	Alignment Length	Mismatches	Gap Open	Synechocystis sp. PCC 6803 Start	Synechocystis sp. PCC 6803 End	PCC 11901 Start	PCC 11901 End	E-value	Bit Score
sp|P74232|PUR2_SYNY3	WP_030007214.1	58.993	417	171	0	1	417	1	417	3.42e-167	472
sp|P74232|PUR2_SYNY3	WP_030006701.1	28.125	128	79	4	94	212	97	220	0.021	33.1
sp|P74232|PUR2_SYNY3	WP_012307729.1	24.528	212	128	9	89	286	101	294	0.055	32.0
sp|P74232|PUR2_SYNY3	WP_138071383.1	29.358	109	65	5	100	201	215	318	0.13	31.2
sp|P74232|PUR2_SYNY3	WP_030007634.1	27.119	118	76	5	131	244	708	819	0.15	30.8
sp|P74232|PUR2_SYNY3	WP_138073092.1	29.348	92	59	4	126	212	150	240	0.80	28.1
slr0477	Q55172	phosphoribosylglycinamide formyltransferase	purN	purN	Purine ribonucleotide biosynthesis	Purines, pyrimidines, nucleosides, and nucleotides	Soluble proteins	0.716789947	23.5	0.0
BLAST Output	PCC 11901 Accession	Percentage Identity	Alignment Length	Mismatches	Gap Open	Synechocystis sp. PCC 6803 Start	Synechocystis sp. PCC 6803 End	PCC 11901 Start	PCC 11901 End	E-value	Bit Score
tr|Q55172|Q55172_SYNY3	WP_138071962.1	64.151	212	76	0	4	215	1	212	4.73e-98	281
tr|Q55172|Q55172_SYNY3	WP_138073040.1	39.024	82	49	1	103	184	158	238	2.70e-15	69.7
tr|Q55172|Q55172_SYNY3	WP_138072379.1	29.126	103	72	1	98	199	83	185	1.87e-07	47.0
tr|Q55172|Q55172_SYNY3	WP_138073370.1	27.350	117	79	2	68	184	48	158	9.00e-06	42.0
tr|Q55172|Q55172_SYNY3	WP_138072317.1	23.784	185	119	4	26	196	29	205	0.22	28.9
tr|Q55172|Q55172_SYNY3	WP_012306867.1	30.556	72	46	2	35	104	229	298	0.64	27.3
sll0070	Q55135	phosphoribosylglycinamide formyltransferase	purU	purU, tgs	Purine ribonucleotide biosynthesis	Purines, pyrimidines, nucleosides, and nucleotides	Soluble proteins	0.708261843	32.6	0.0
BLAST Output	PCC 11901 Accession	Percentage Identity	Alignment Length	Mismatches	Gap Open	Synechocystis sp. PCC 6803 Start	Synechocystis sp. PCC 6803 End	PCC 11901 Start	PCC 11901 End	E-value	Bit Score
sp|Q55135|PURU_SYNY3	WP_138073040.1	70.000	280	84	0	5	284	3	282	2.74e-149	416
sp|Q55135|PURU_SYNY3	WP_138071962.1	31.915	141	92	3	113	249	50	190	1.60e-16	73.2
sp|Q55135|PURU_SYNY3	WP_138073370.1	26.957	115	81	2	140	252	57	170	5.42e-08	49.7
sp|Q55135|PURU_SYNY3	WP_138072379.1	26.154	130	89	2	128	256	62	185	1.49e-06	45.1
sp|Q55135|PURU_SYNY3	WP_138071373.1	52.381	21	10	0	127	147	148	168	0.16	29.6
sp|Q55135|PURU_SYNY3	WP_138071914.1	34.286	35	23	0	34	68	90	124	0.81	27.7
slr0861	Q55336	glycinamide ribonucleotide transformylase	purT	purT	Purine ribonucleotide biosynthesis	Purines, pyrimidines, nucleosides, and nucleotides	Soluble proteins	0.820487691	42.4	0.0
BLAST Output	PCC 11901 Accession	Percentage Identity	Alignment Length	Mismatches	Gap Open	Synechocystis sp. PCC 6803 Start	Synechocystis sp. PCC 6803 End	PCC 11901 Start	PCC 11901 End	E-value	Bit Score
sp|Q55336|PURT_SYNY3	WP_030006701.1	71.466	382	109	0	5	386	3	384	0.0	557
sp|Q55336|PURT_SYNY3	WP_138072599.1	30.303	231	152	5	146	373	134	358	8.17e-22	92.4
sp|Q55336|PURT_SYNY3	WP_030007882.1	26.506	83	59	2	232	312	152	234	0.001	37.0
sp|Q55336|PURT_SYNY3	WP_030007634.1	21.782	303	200	13	9	280	8	304	0.001	37.7
sp|Q55336|PURT_SYNY3	WP_030007634.1	18.182	154	120	3	131	280	702	853	0.11	31.2
sp|Q55336|PURT_SYNY3	WP_012307729.1	30.435	69	44	2	139	203	147	215	0.039	32.3
sp|Q55336|PURT_SYNY3	WP_138071802.1	44.186	43	21	2	271	310	109	151	0.28	29.3
sp|Q55336|PURT_SYNY3	WP_138073081.1	35.135	37	24	0	6	42	176	212	0.57	28.5
sp|Q55336|PURT_SYNY3	WP_138072293.1	30.000	60	38	2	164	219	26	85	0.82	28.1
sp|Q55336|PURT_SYNY3	WP_138071383.1	23.656	93	66	4	103	193	213	302	0.82	28.1
sp|Q55336|PURT_SYNY3	WP_138072416.1	24.752	101	63	4	39	127	190	289	0.85	28.1
sll1056	P72644	phosphoribosylformyl glycinamidine synthetase II	purL	PurL, purI	Purine ribonucleotide biosynthesis	Purines, pyrimidines, nucleosides, and nucleotides	Soluble proteins	0.894167202	81.8	0.0
BLAST Output	PCC 11901 Accession	Percentage Identity	Alignment Length	Mismatches	Gap Open	Synechocystis sp. PCC 6803 Start	Synechocystis sp. PCC 6803 End	PCC 11901 Start	PCC 11901 End	E-value	Bit Score
sp|P72644|PURL_SYNY3	WP_138073376.1	76.078	765	173	5	4	766	5	761	0.0	1171
sp|P72644|PURL_SYNY3	WP_138072295.1	23.204	181	121	5	74	248	56	224	5.03e-05	42.7
sp|P72644|PURL_SYNY3	WP_138072295.1	36.667	60	34	1	495	554	82	137	0.043	33.1
sp|P72644|PURL_SYNY3	WP_168191166.1	23.780	164	106	7	52	212	21	168	0.005	36.2
sp|P72644|PURL_SYNY3	WP_138073151.1	32.787	61	38	3	494	554	70	127	0.23	30.8
sp|P72644|PURL_SYNY3	WP_138073799.1	30.435	92	50	2	383	474	156	233	0.32	30.4
sp|P72644|PURL_SYNY3	WP_138071796.1	20.599	267	183	11	42	297	391	639	0.52	30.0
slr0520	Q55843	phosphoribosyl formylglycinamidine synthase	purL	purL, purI	Purine ribonucleotide biosynthesis	Purines, pyrimidines, nucleosides, and nucleotides	Soluble proteins	0.820102945	24.4	0.0
BLAST Output	PCC 11901 Accession	Percentage Identity	Alignment Length	Mismatches	Gap Open	Synechocystis sp. PCC 6803 Start	Synechocystis sp. PCC 6803 End	PCC 11901 Start	PCC 11901 End	E-value	Bit Score
sp|Q55843|PURQ_SYNY3	WP_138073317.1	71.364	220	63	0	3	222	2	221	2.08e-123	346
sp|Q55843|PURQ_SYNY3	WP_138071529.1	28.571	105	37	5	19	105	24	108	0.011	32.3
sp|Q55843|PURQ_SYNY3	WP_030007384.1	57.895	19	8	0	195	213	128	146	0.76	26.6
slr0838	Q55422	phosphoribosyl formylglycinamidine cyclo-ligase	purM	purM, purG	Purine ribonucleotide biosynthesis	Purines, pyrimidines, nucleosides, and nucleotides	Soluble proteins	0.915291317	36.1	0.0
BLAST Output	PCC 11901 Accession	Percentage Identity	Alignment Length	Mismatches	Gap Open	Synechocystis sp. PCC 6803 Start	Synechocystis sp. PCC 6803 End	PCC 11901 Start	PCC 11901 End	E-value	Bit Score
sp|Q55422|PUR5_SYNY3	WP_138072295.1	68.955	335	104	0	1	335	1	335	2.34e-163	456
sp|Q55422|PUR5_SYNY3	WP_138072144.1	26.347	167	102	4	86	250	85	232	1.41e-05	42.7
sp|Q55422|PUR5_SYNY3	WP_138073376.1	29.000	100	65	2	86	181	113	210	1.52e-04	40.0
sp|Q55422|PUR5_SYNY3	WP_138073376.1	31.481	54	33	1	88	137	498	551	0.49	28.9
sp|Q55422|PUR5_SYNY3	WP_138071796.1	26.415	106	62	4	85	183	466	562	0.019	33.1
sll0578	P74724	phosphoribosylaminoimidazole carboxylase ATPase subunit	purK	purK	Purine ribonucleotide biosynthesis	Purines, pyrimidines, nucleosides, and nucleotides	Soluble proteins	0.750088243	42.6	0.0
BLAST Output	PCC 11901 Accession	Percentage Identity	Alignment Length	Mismatches	Gap Open	Synechocystis sp. PCC 6803 Start	Synechocystis sp. PCC 6803 End	PCC 11901 Start	PCC 11901 End	E-value	Bit Score
sp|P74724|PURK_SYNY3	WP_138072599.1	54.124	388	155	7	8	388	5	376	7.36e-136	390
sp|P74724|PURK_SYNY3	WP_030006701.1	24.051	395	269	10	8	384	9	390	2.02e-21	91.3
sp|P74724|PURK_SYNY3	WP_138073812.1	30.612	98	51	4	180	269	224	312	0.13	30.4
sll0901	Q55498	phosphoribosylaminoimidazole carboxylase	purE	purE, ade6	Purine ribonucleotide biosynthesis	Purines, pyrimidines, nucleosides, and nucleotides	Soluble proteins	0.743916162	18.6	0.0
BLAST Output	PCC 11901 Accession	Percentage Identity	Alignment Length	Mismatches	Gap Open	Synechocystis sp. PCC 6803 Start	Synechocystis sp. PCC 6803 End	PCC 11901 Start	PCC 11901 End	E-value	Bit Score
sp|Q55498|PURE_SYNY3	WP_138071891.1	76.879	173	40	0	1	173	1	173	2.13e-96	273
sp|Q55498|PURE_SYNY3	WP_138072920.1	30.657	137	73	6	8	133	124	249	8.87e-05	38.1
sp|Q55498|PURE_SYNY3	WP_138073309.1	22.222	153	103	5	23	169	391	533	0.18	28.5
sp|Q55498|PURE_SYNY3	WP_138073117.1	28.571	77	40	2	34	103	223	291	0.37	27.3
slr1226	P73471	phosphoribosyl aminoidazole succinocarboxamide synthetase	purC	purC	Purine ribonucleotide biosynthesis	Purines, pyrimidines, nucleosides, and nucleotides	Soluble proteins	0.852344409	29.7	0.0
BLAST Output	PCC 11901 Accession	Percentage Identity	Alignment Length	Mismatches	Gap Open	Synechocystis sp. PCC 6803 Start	Synechocystis sp. PCC 6803 End	PCC 11901 Start	PCC 11901 End	E-value	Bit Score
sp|P73471|PUR7_SYNY3	WP_138072256.1	69.008	242	75	0	18	259	7	248	5.75e-124	350
sp|P73471|PUR7_SYNY3	WP_138072511.1	43.333	30	17	0	125	154	129	158	0.76	27.3
sll0421	P74384	adenylosuccinate lyase	purB	purB	Purine ribonucleotide biosynthesis	Purines, pyrimidines, nucleosides, and nucleotides	Soluble proteins	1.0	48.4	0.0
BLAST Output	PCC 11901 Accession	Percentage Identity	Alignment Length	Mismatches	Gap Open	Synechocystis sp. PCC 6803 Start	Synechocystis sp. PCC 6803 End	PCC 11901 Start	PCC 11901 End	E-value	Bit Score
sp|P74384|PUR8_SYNY3	WP_012308248.1	82.831	431	74	0	1	431	1	431	0.0	743
sp|P74384|PUR8_SYNY3	WP_138071486.1	27.650	217	137	6	81	287	99	305	1.49e-10	59.3
sp|P74384|PUR8_SYNY3	WP_138073564.1	24.920	313	186	13	20	290	42	347	3.90e-07	48.5
slr0597	P74741	phosphoribosyl aminoimidazole carboxy formyl formyltransferase/inosinemonophosphate cyclohydrolase (PUR-H(J))	purH	purH	Purine ribonucleotide biosynthesis	Purines, pyrimidines, nucleosides, and nucleotides	Soluble proteins	0.925987744	59.3	0.0
BLAST Output	PCC 11901 Accession	Percentage Identity	Alignment Length	Mismatches	Gap Open	Synechocystis sp. PCC 6803 Start	Synechocystis sp. PCC 6803 End	PCC 11901 Start	PCC 11901 End	E-value	Bit Score
sp|P74741|PUR9_SYNY3	WP_138073396.1	71.735	513	141	2	3	511	4	516	0.0	757
sp|P74741|PUR9_SYNY3	WP_138071834.1	33.803	71	40	3	412	481	201	265	0.88	28.5
slr1722	P73853	inosine-5'-monophosphate dehydrogenase	guaB	guaB, gnaB	Purine ribonucleotide biosynthesis	Purines, pyrimidines, nucleosides, and nucleotides	Soluble proteins	0.912282658	40.2	0.0
BLAST Output	PCC 11901 Accession	Percentage Identity	Alignment Length	Mismatches	Gap Open	Synechocystis sp. PCC 6803 Start	Synechocystis sp. PCC 6803 End	PCC 11901 Start	PCC 11901 End	E-value	Bit Score
tr|P73853|P73853_SYNY3	WP_012305900.1	82.171	387	69	0	1	387	1	387	0.0	656
tr|P73853|P73853_SYNY3	WP_138073086.1	30.216	139	70	6	181	300	180	310	1.98e-04	39.3
tr|P73853|P73853_SYNY3	WP_138071960.1	24.299	214	121	6	75	287	38	211	0.026	32.3
tr|P73853|P73853_SYNY3	WP_138073476.1	36.735	49	31	0	256	304	579	627	0.31	29.6
tr|P73853|P73853_SYNY3	WP_138071422.1	34.615	52	33	1	199	250	26	76	0.34	29.3
tr|P73853|P73853_SYNY3	WP_012305958.1	36.111	36	23	0	135	170	68	103	0.92	27.7
slr0213	P49057	GMP synthetase	guaA	guaA	Purine ribonucleotide biosynthesis	Purines, pyrimidines, nucleosides, and nucleotides	Soluble proteins	0.929424615	61.0	0.0
BLAST Output	PCC 11901 Accession	Percentage Identity	Alignment Length	Mismatches	Gap Open	Synechocystis sp. PCC 6803 Start	Synechocystis sp. PCC 6803 End	PCC 11901 Start	PCC 11901 End	E-value	Bit Score
sp|P49057|GUAA_SYNY3	WP_173867208.1	85.413	521	76	0	22	542	8	528	0.0	937
sp|P49057|GUAA_SYNY3	WP_030007514.1	26.042	192	132	4	28	209	1	192	2.52e-11	59.7
sp|P49057|GUAA_SYNY3	WP_138071502.1	26.012	173	111	9	29	195	195	356	1.56e-05	43.5
sp|P49057|GUAA_SYNY3	WP_138071529.1	29.197	137	70	8	98	212	74	205	0.002	36.6
sp|P49057|GUAA_SYNY3	WP_138071760.1	38.356	73	37	4	240	307	3	72	0.009	35.0
sp|P49057|GUAA_SYNY3	WP_138071214.1	54.545	33	14	1	240	272	6	37	0.031	32.7
sp|P49057|GUAA_SYNY3	WP_138073834.1	31.169	77	43	3	256	332	46	112	0.15	30.8
sp|P49057|GUAA_SYNY3	WP_138071614.1	32.143	56	36	1	443	498	389	442	0.17	30.8
sp|P49057|GUAA_SYNY3	WP_138072347.1	40.000	30	18	0	240	269	19	48	0.77	28.5
slr1123	P72648	guanylate kinase	gmpK	gmk, spoR, slr1123	Purine ribonucleotide biosynthesis	Purines, pyrimidines, nucleosides, and nucleotides	Soluble proteins	0.736962469	21.4	0.0
BLAST Output	PCC 11901 Accession	Percentage Identity	Alignment Length	Mismatches	Gap Open	Synechocystis sp. PCC 6803 Start	Synechocystis sp. PCC 6803 End	PCC 11901 Start	PCC 11901 End	E-value	Bit Score
sp|P72648|KGUA_SYNY3	WP_138073489.1	64.641	181	64	0	7	187	2	182	3.55e-82	238
sp|P72648|KGUA_SYNY3	WP_138073901.1	33.333	75	44	3	9	78	391	464	0.003	34.3
sp|P72648|KGUA_SYNY3	WP_138072697.1	41.935	31	18	0	1	31	166	196	0.030	31.2
sp|P72648|KGUA_SYNY3	WP_099238163.1	27.485	171	93	8	10	160	373	532	0.039	30.8
sp|P72648|KGUA_SYNY3	WP_138073640.1	25.434	173	94	9	10	160	365	524	0.041	30.8
sp|P72648|KGUA_SYNY3	WP_030007725.1	37.037	27	17	0	4	30	29	55	0.24	28.1
sp|P72648|KGUA_SYNY3	WP_138072881.1	50.000	22	11	0	9	30	33	54	0.25	28.1
sp|P72648|KGUA_SYNY3	WP_138073562.1	52.381	21	10	0	10	30	29	49	0.33	27.7
sp|P72648|KGUA_SYNY3	WP_012307050.1	52.000	25	12	0	6	30	29	53	0.34	27.7
sp|P72648|KGUA_SYNY3	WP_138073798.1	42.500	40	21	1	9	46	26	65	0.36	28.1
sp|P72648|KGUA_SYNY3	WP_062436324.1	45.455	22	12	0	10	31	34	55	0.54	26.9
sp|P72648|KGUA_SYNY3	WP_138073274.1	50.000	22	11	0	9	30	37	58	0.61	26.9
sp|P72648|KGUA_SYNY3	WP_030007300.1	34.091	44	17	1	10	53	42	73	0.63	26.9
sp|P72648|KGUA_SYNY3	WP_138073367.1	33.333	45	18	1	9	53	36	68	0.85	26.6
sp|P72648|KGUA_SYNY3	WP_138072716.1	47.619	21	11	0	10	30	387	407	0.86	26.6
sp|P72648|KGUA_SYNY3	WP_012307505.1	47.619	21	11	0	9	29	38	58	0.89	26.6
sp|P72648|KGUA_SYNY3	WP_138072293.1	32.609	46	29	1	4	47	275	320	0.92	26.6
sll1823	P73290	adenylosuccinate synthetase	purA	purA, adeK	Purine ribonucleotide biosynthesis	Purines, pyrimidines, nucleosides, and nucleotides	Soluble proteins	0.856465847	48.6	0.0
BLAST Output	PCC 11901 Accession	Percentage Identity	Alignment Length	Mismatches	Gap Open	Synechocystis sp. PCC 6803 Start	Synechocystis sp. PCC 6803 End	PCC 11901 Start	PCC 11901 End	E-value	Bit Score
sp|P73290|PURA_SYNY3	WP_012306510.1	78.781	443	94	0	2	444	1	443	0.0	733
sp|P73290|PURA_SYNY3	WP_138071642.1	32.927	82	52	1	345	426	197	275	0.060	32.0
sp|P73290|PURA_SYNY3	WP_012307207.1	31.343	67	46	0	138	204	34	100	0.084	29.6
sll1815	P73302	adenylate kinase	adk	adk	Purine ribonucleotide biosynthesis	Purines, pyrimidines, nucleosides, and nucleotides	Soluble proteins	1.0	20.4	0.0
BLAST Output	PCC 11901 Accession	Percentage Identity	Alignment Length	Mismatches	Gap Open	Synechocystis sp. PCC 6803 Start	Synechocystis sp. PCC 6803 End	PCC 11901 Start	PCC 11901 End	E-value	Bit Score
sp|P73302|KAD1_SYNY3	WP_012306671.1	60.000	185	74	0	1	185	1	185	7.58e-80	232
sp|P73302|KAD1_SYNY3	WP_065710337.1	37.500	32	20	0	3	34	202	233	0.18	28.9
sp|P73302|KAD1_SYNY3	WP_138073107.1	36.170	47	27	2	5	51	257	300	0.26	28.1
sp|P73302|KAD1_SYNY3	WP_012305681.1	40.000	30	18	0	5	34	195	224	0.30	28.1
sp|P73302|KAD1_SYNY3	WP_138073103.1	36.667	30	19	0	5	34	217	246	0.33	28.1
sp|P73302|KAD1_SYNY3	WP_138072301.1	37.500	32	20	0	3	34	205	236	0.34	28.1
sp|P73302|KAD1_SYNY3	WP_138072525.1	35.897	39	25	0	2	40	5	43	0.83	26.2
sll1059	P72641	adenylate kinase		adk	Purine ribonucleotide biosynthesis	Purines, pyrimidines, nucleosides, and nucleotides	Soluble proteins	0.742107952	20.3	0.0
BLAST Output	PCC 11901 Accession	Percentage Identity	Alignment Length	Mismatches	Gap Open	Synechocystis sp. PCC 6803 Start	Synechocystis sp. PCC 6803 End	PCC 11901 Start	PCC 11901 End	E-value	Bit Score
sp|P72641|KAD2_SYNY3	WP_012306671.1	43.678	174	98	0	1	174	5	178	2.84e-49	154
sp|P72641|KAD2_SYNY3	WP_138072525.1	30.400	125	71	5	5	128	12	121	0.011	31.6
sp|P72641|KAD2_SYNY3	WP_138071766.1	38.889	36	22	0	5	40	14	49	0.048	30.0
sp|P72641|KAD2_SYNY3	WP_138073134.1	27.059	85	53	3	63	147	98	173	0.41	27.3
slr1164	P74240	ribonucleotide reductase subunit alpha	nrdA	nrdA, dnaF	Pyrimidine ribonucleotide biosynthesis	Purines, pyrimidines, nucleosides, and nucleotides	Soluble proteins	0.923798334	85.6	0.0
BLAST Output	PCC 11901 Accession	Percentage Identity	Alignment Length	Mismatches	Gap Open	Synechocystis sp. PCC 6803 Start	Synechocystis sp. PCC 6803 End	PCC 11901 Start	PCC 11901 End	E-value	Bit Score
sp|P74240|RIR1_SYNY3	WP_138073793.1	73.333	735	196	0	33	767	1	735	0.0	1167
sp|P74240|RIR1_SYNY3	WP_138072972.1	45.652	46	23	1	284	327	318	363	0.065	32.7
slr0591	P74732	ribonucleoside-diphosphate reductase beta chain	nrdF	nrdF	Purine ribonucleotide biosynthesis	Purines, pyrimidines, nucleosides, and nucleotides	Soluble proteins	0.916931688	41.6	0.0
BLAST Output	PCC 11901 Accession	Percentage Identity	Alignment Length	Mismatches	Gap Open	Synechocystis sp. PCC 6803 Start	Synechocystis sp. PCC 6803 End	PCC 11901 Start	PCC 11901 End	E-value	Bit Score
tr|P74732|P74732_SYNY3	WP_041443740.1	80.175	343	68	0	12	354	1	343	0.0	597
tr|P74732|P74732_SYNY3	WP_012307288.1	29.670	91	44	4	276	351	159	244	0.079	30.8
sll1852	P74494	nucleoside diphosphate kinase	ndkR	ndk, ndkR	Pyrimidine ribonucleotide biosynthesis	Purines, pyrimidines, nucleosides, and nucleotides	Soluble proteins	0.901280449	16.7	0.0
BLAST Output	PCC 11901 Accession	Percentage Identity	Alignment Length	Mismatches	Gap Open	Synechocystis sp. PCC 6803 Start	Synechocystis sp. PCC 6803 End	PCC 11901 Start	PCC 11901 End	E-value	Bit Score
sp|P74494|NDK_SYNY3	WP_030007591.1	58.389	149	62	0	1	149	1	149	7.10e-68	199
Pyrimidine biosynthesis
slr1476	P74163	aspartate carbamoyltransferase	pyrB	pyrB	Pyrimidine ribonucleotide biosynthesis	Purines, pyrimidines, nucleosides, and nucleotides	Unknown	0.604176622	36.4	0.0
BLAST Output	PCC 11901 Accession	Percentage Identity	Alignment Length	Mismatches	Gap Open	Synechocystis sp. PCC 6803 Start	Synechocystis sp. PCC 6803 End	PCC 11901 Start	PCC 11901 End	E-value	Bit Score
sp|P74163|PYRB_SYNY3	WP_181445658.1	70.948	327	94	1	2	328	7	332	2.34e-176	489
sp|P74163|PYRB_SYNY3	WP_012306303.1	26.140	329	201	14	12	329	9	306	7.85e-14	67.4
sp|P74163|PYRB_SYNY3	WP_138072535.1	38.462	52	28	3	164	211	358	409	0.22	29.6
slr0406	P74438	dihydroorotase	pyrC	pyrC	Pyrimidine ribonucleotide biosynthesis	Purines, pyrimidines, nucleosides, and nucleotides	Soluble proteins	0.886251732	38.1	0.0
BLAST Output	PCC 11901 Accession	Percentage Identity	Alignment Length	Mismatches	Gap Open	Synechocystis sp. PCC 6803 Start	Synechocystis sp. PCC 6803 End	PCC 11901 Start	PCC 11901 End	E-value	Bit Score
sp|P74438|PYRC_SYNY3	WP_138073591.1	78.070	342	74	1	1	341	1	342	0.0	566
sp|P74438|PYRC_SYNY3	WP_138073227.1	33.929	56	35	2	40	94	236	290	0.51	28.5
slr1418	P74782	dihydroorotate dehydrogenase	pyrD	pyrD	Pyrimidine ribonucleotide biosynthesis	Purines, pyrimidines, nucleosides, and nucleotides	PM	0.784008252	41.5	0.0
BLAST Output	PCC 11901 Accession	Percentage Identity	Alignment Length	Mismatches	Gap Open	Synechocystis sp. PCC 6803 Start	Synechocystis sp. PCC 6803 End	PCC 11901 Start	PCC 11901 End	E-value	Bit Score
sp|P74782|PYRD_SYNY3	WP_138073642.1	60.695	374	146	1	1	373	3	376	6.86e-169	473
sp|P74782|PYRD_SYNY3	WP_065710882.1	37.879	66	35	3	177	240	10	71	0.008	34.3
sp|P74782|PYRD_SYNY3	WP_065710244.1	29.412	51	32	1	327	373	149	199	0.74	27.7
slr0185	Q55574	orotate phosphoribosyltransferase	pyrE	umpS, pyrE	Pyrimidine ribonucleotide biosynthesis	Purines, pyrimidines, nucleosides, and nucleotides	Soluble proteins	1.0	21.4	0.0
BLAST Output	PCC 11901 Accession	Percentage Identity	Alignment Length	Mismatches	Gap Open	Synechocystis sp. PCC 6803 Start	Synechocystis sp. PCC 6803 End	PCC 11901 Start	PCC 11901 End	E-value	Bit Score
sp|Q55574|PYRE_SYNY3	WP_138073120.1	71.204	191	55	0	6	196	4	194	1.35e-91	263
sp|Q55574|PYRE_SYNY3	WP_138072606.1	29.310	174	100	5	33	197	308	467	1.14e-16	73.9
sp|Q55574|PYRE_SYNY3	WP_012306606.1	34.921	63	37	2	54	116	71	129	0.27	28.1
sp|Q55574|PYRE_SYNY3	WP_138072802.1	32.653	49	32	1	47	95	136	183	0.36	27.7
sll0838	P73761	orotidine 5' monophosphate decarboxylase	pyrF	pyrF	Pyrimidine ribonucleotide biosynthesis	Purines, pyrimidines, nucleosides, and nucleotides	Soluble proteins	0.882534543	24.7	0.0
BLAST Output	PCC 11901 Accession	Percentage Identity	Alignment Length	Mismatches	Gap Open	Synechocystis sp. PCC 6803 Start	Synechocystis sp. PCC 6803 End	PCC 11901 Start	PCC 11901 End	E-value	Bit Score
sp|P73761|PYRF_SYNY3	WP_138072531.1	63.596	228	81	1	4	231	3	228	1.77e-92	268
sp|P73761|PYRF_SYNY3	WP_138072124.1	38.596	57	33	2	76	131	116	171	0.047	30.8
sp|P73761|PYRF_SYNY3	WP_138072749.1	32.911	79	39	3	48	123	103	170	0.39	28.1
sll0144	P74457	uridine monophosphate kinase	pyrH	pyrH, smbA	Pyrimidine ribonucleotide biosynthesis	Purines, pyrimidines, nucleosides, and nucleotides	Soluble proteins	1.0	27.6	0.0
BLAST Output	PCC 11901 Accession	Percentage Identity	Alignment Length	Mismatches	Gap Open	Synechocystis sp. PCC 6803 Start	Synechocystis sp. PCC 6803 End	PCC 11901 Start	PCC 11901 End	E-value	Bit Score
sp|P74457|PYRH_SYNY3	WP_012306580.1	82.083	240	43	0	21	260	1	240	7.99e-147	407
sp|P74457|PYRH_SYNY3	WP_012307393.1	25.688	109	68	1	156	251	145	253	1.46e-05	42.0
sp|P74457|PYRH_SYNY3	WP_138073156.1	24.057	212	133	6	48	231	19	230	0.013	33.1
sp|P74457|PYRH_SYNY3	WP_138073668.1	27.119	59	38	1	9	67	114	167	0.35	28.5
sp|P74457|PYRH_SYNY3	WP_138070978.1	27.119	59	38	1	9	67	114	167	0.35	28.5
sp|P74457|PYRH_SYNY3	WP_138071019.1	27.119	59	38	1	9	67	114	167	0.37	28.5
sll1852	P74494	nucleoside diphosphate kinase	ndkR	ndk, ndkR	Pyrimidine ribonucleotide biosynthesis	Purines, pyrimidines, nucleosides, and nucleotides	Soluble proteins	0.901280449	16.7	0.0
BLAST Output	PCC 11901 Accession	Percentage Identity	Alignment Length	Mismatches	Gap Open	Synechocystis sp. PCC 6803 Start	Synechocystis sp. PCC 6803 End	PCC 11901 Start	PCC 11901 End	E-value	Bit Score
sp|P74494|NDK_SYNY3	WP_030007591.1	58.389	149	62	0	1	149	1	149	7.10e-68	199
sll1443	P74208	CTP synthetase	pyrG	pyrG	Pyrimidine ribonucleotide biosynthesis	Purines, pyrimidines, nucleosides, and nucleotides	Soluble proteins	1.0	60.8	0.0
BLAST Output	PCC 11901 Accession	Percentage Identity	Alignment Length	Mismatches	Gap Open	Synechocystis sp. PCC 6803 Start	Synechocystis sp. PCC 6803 End	PCC 11901 Start	PCC 11901 End	E-value	Bit Score
sp|P74208|PYRG_SYNY3	WP_138073236.1	79.813	535	108	0	1	535	1	535	0.0	906
sp|P74208|PYRG_SYNY3	WP_138071502.1	36.170	47	29	1	488	534	335	380	0.027	33.5
sp|P74208|PYRG_SYNY3	WP_138073661.1	28.455	123	81	3	204	320	260	381	0.18	30.8
sp|P74208|PYRG_SYNY3	WP_138071529.1	29.167	72	32	3	330	385	17	85	0.74	28.5
slr1164	P74240	ribonucleotide reductase subunit alpha	nrdA	nrdA, dnaF	Pyrimidine ribonucleotide biosynthesis	Purines, pyrimidines, nucleosides, and nucleotides	Soluble proteins	0.923798334	85.6	0.0
BLAST Output	PCC 11901 Accession	Percentage Identity	Alignment Length	Mismatches	Gap Open	Synechocystis sp. PCC 6803 Start	Synechocystis sp. PCC 6803 End	PCC 11901 Start	PCC 11901 End	E-value	Bit Score
sp|P74240|RIR1_SYNY3	WP_138073793.1	73.333	735	196	0	33	767	1	735	0.0	1167
sp|P74240|RIR1_SYNY3	WP_138072972.1	45.652	46	23	1	284	327	318	363	0.065	32.7
sll0509	Q55478	similar to 5',5'''-P-1,P-4-tetraphosphate phosphorylase II	nrdF		Purine ribonucleotide biosynthesis	Purines, pyrimidines, nucleosides, and nucleotides	Soluble proteins	0.931624332	33.9	0.0
BLAST Output	PCC 11901 Accession	Percentage Identity	Alignment Length	Mismatches	Gap Open	Synechocystis sp. PCC 6803 Start	Synechocystis sp. PCC 6803 End	PCC 11901 Start	PCC 11901 End	E-value	Bit Score
tr|Q55478|Q55478_SYNY3	WP_138071563.1	45.055	273	137	6	37	299	20	289	1.56e-65	204
sll1258	P74073	dCTP deaminase	dcd	dcd	Pyrimidine ribonucleotide biosynthesis	Purines, pyrimidines, nucleosides, and nucleotides	Soluble proteins	0.897674069	21.4	0.0
BLAST Output	PCC 11901 Accession	Percentage Identity	Alignment Length	Mismatches	Gap Open	Synechocystis sp. PCC 6803 Start	Synechocystis sp. PCC 6803 End	PCC 11901 Start	PCC 11901 End	E-value	Bit Score
tr|P74073|P74073_SYNY3	WP_030006523.1	66.162	198	62	1	1	193	1	198	6.42e-99	281
tr|P74073|P74073_SYNY3	WP_065710899.1	27.660	47	31	1	92	135	26	72	0.072	28.1
tr|P74073|P74073_SYNY3	WP_099239252.1	28.916	83	47	3	93	169	81	157	0.13	28.9
tr|P74073|P74073_SYNY3	WP_045441381.1	50.000	24	12	0	6	29	216	239	0.39	27.7
tr|P74073|P74073_SYNY3	WP_138072955.1	30.508	59	37	1	67	125	85	139	0.95	26.2
sll1635	P73053	Thy1 protein homolog	thyX	dgt	Pyrimidine ribonucleotide biosynthesis	Purines, pyrimidines, nucleosides, and nucleotides	Soluble proteins	0.904019334	25.1	0.0
BLAST Output	PCC 11901 Accession	Percentage Identity	Alignment Length	Mismatches	Gap Open	Synechocystis sp. PCC 6803 Start	Synechocystis sp. PCC 6803 End	PCC 11901 Start	PCC 11901 End	E-value	Bit Score
sp|P73053|THYX_SYNY3	WP_030006522.1	27.941	68	45	1	141	208	430	493	6.04e-04	36.6
slr0379	Q55593	thymidylate kinase	tmk	tmk	Other	Other Categories	Unknown	0.725745169	26.7	0.0
BLAST Output	PCC 11901 Accession	Percentage Identity	Alignment Length	Mismatches	Gap Open	Synechocystis sp. PCC 6803 Start	Synechocystis sp. PCC 6803 End	PCC 11901 Start	PCC 11901 End	E-value	Bit Score
sp|Q55593|KTHY_SYNY3	WP_138073183.1	50.962	208	96	1	3	210	7	208	4.96e-70	209
sp|Q55593|KTHY_SYNY3	WP_138073133.1	34.286	35	20	1	111	145	504	535	0.31	28.5
Nucleotide salvage
sll0398	Q55731	deoxyguanosinetriphosphate triphosphohydrolase	dgt	dgt	Purine ribonucleotide biosynthesis	Purines, pyrimidines, nucleosides, and nucleotides	Unknown	0.713256213	49.9	0.0
BLAST Output	PCC 11901 Accession	Percentage Identity	Alignment Length	Mismatches	Gap Open	Synechocystis sp. PCC 6803 Start	Synechocystis sp. PCC 6803 End	PCC 11901 Start	PCC 11901 End	E-value	Bit Score
sp|Q55731|DGTL2_SYNY3	WP_062432140.1	48.000	25	13	0	211	235	76	100	0.65	28.9
sll1035	P72753	uracil phosphoribosyltransferase	upp	upp, uraP	Purines, pyrimidines, nucleosides, and nucleotides	Purines, pyrimidines, nucleosides, and nucleotides	Soluble proteins	0.899433133	23.6	0.0
BLAST Output	PCC 11901 Accession	Percentage Identity	Alignment Length	Mismatches	Gap Open	Synechocystis sp. PCC 6803 Start	Synechocystis sp. PCC 6803 End	PCC 11901 Start	PCC 11901 End	E-value	Bit Score
sp|P72753|UPP_SYNY3	WP_138073395.1	68.203	217	68	1	1	216	1	217	2.38e-105	299
sll1430	P73935	adenine phosphoribosyltransferase	apt	apt	Purines, pyrimidines, nucleosides, and nucleotides	Purines, pyrimidines, nucleosides, and nucleotides	Soluble proteins	0.765962061	19.0	0.0
BLAST Output	PCC 11901 Accession	Percentage Identity	Alignment Length	Mismatches	Gap Open	Synechocystis sp. PCC 6803 Start	Synechocystis sp. PCC 6803 End	PCC 11901 Start	PCC 11901 End	E-value	Bit Score
sp|P73935|APT_SYNY3	WP_030007782.1	72.674	172	47	0	1	172	1	172	4.03e-94	267
sp|P73935|APT_SYNY3	WP_138072104.1	37.500	40	24	1	4	43	284	322	0.015	32.0
sp|P73935|APT_SYNY3	WP_062431585.1	41.176	34	20	0	116	149	180	213	0.021	31.2
sp|P73935|APT_SYNY3	WP_138073674.1	27.419	62	39	2	40	101	622	677	0.14	28.9
sp|P73935|APT_SYNY3	WP_138073395.1	35.185	54	26	3	94	138	104	157	0.41	26.9
slr1237	P73487	cytosine deaminase	codA	codA	Pyrimidine ribonucleotide biosynthesis	Purines, pyrimidines, nucleosides, and nucleotides	Unknown	0.424999486	49.8	0.0
BLAST Output	PCC 11901 Accession	Percentage Identity	Alignment Length	Mismatches	Gap Open	Synechocystis sp. PCC 6803 Start	Synechocystis sp. PCC 6803 End	PCC 11901 Start	PCC 11901 End	E-value	Bit Score
tr|P73487|P73487_SYNY3	WP_138073062.1	32.813	64	32	1	357	420	262	314	0.22	30.4
tr|P73487|P73487_SYNY3	WP_138073456.1	45.000	20	11	0	314	333	8	27	0.86	27.3
Possible role in nucleotide biosynthesis/salvage
sll1631	P73717	putative cytidine and deoxycytidylate deaminase		sll1631	Pyrimidine ribonucleotide biosynthesis	Purines, pyrimidines, nucleosides, and nucleotides
BLAST Output	PCC 11901 Accession	Percentage Identity	Alignment Length	Mismatches	Gap Open	Synechocystis sp. PCC 6803 Start	Synechocystis sp. PCC 6803 End	PCC 11901 Start	PCC 11901 End	E-value	Bit Score
tr|P73717|P73717_SYNY3	WP_062436634.1	52.414	145	68	1	12	156	1	144	1.61e-50	155
tr|P73717|P73717_SYNY3	WP_138073866.1	30.973	113	67	4	3	106	24	134	7.34e-08	46.6
tr|P73717|P73717_SYNY3	WP_138073262.1	31.081	148	66	8	12	144	17	143	3.91e-06	42.0
tr|P73717|P73717_SYNY3	WP_138072599.1	35.714	56	31	2	23	73	294	349	0.75	26.6
sll1776	P73618	deoxyribose-phosphate aldolase		deoC, dra	Purines, pyrimidines, nucleosides, and nucleotides	Purines, pyrimidines, nucleosides, and nucleotides	Soluble proteins	0.759594964	23.9	0.0
BLAST Output	PCC 11901 Accession	Percentage Identity	Alignment Length	Mismatches	Gap Open	Synechocystis sp. PCC 6803 Start	Synechocystis sp. PCC 6803 End	PCC 11901 Start	PCC 11901 End	E-value	Bit Score
sp|P73618|DEOC_SYNY3	WP_065710244.1	58.065	217	91	0	4	220	5	221	3.10e-92	267
sp|P73618|DEOC_SYNY3	WP_138073642.1	37.838	37	23	0	170	206	301	337	0.39	28.1
sp|P73618|DEOC_SYNY3	WP_012305886.1	30.357	56	32	2	119	167	51	106	0.91	25.8
sll0368	Q55758	uracil phosphoribosyltransferase		pyrR	Purines, pyrimidines, nucleosides, and nucleotides	Purines, pyrimidines, nucleosides, and nucleotides	Unknown	0.682740544	19.9	0.0
BLAST Output	PCC 11901 Accession	Percentage Identity	Alignment Length	Mismatches	Gap Open	Synechocystis sp. PCC 6803 Start	Synechocystis sp. PCC 6803 End	PCC 11901 Start	PCC 11901 End	E-value	Bit Score
sp|Q55758|PYRR_SYNY3	WP_099240573.1	70.621	177	52	0	1	177	1	177	2.20e-91	261
sp|Q55758|PYRR_SYNY3	WP_138072535.1	33.333	57	30	2	94	149	364	413	0.022	31.2
sp|Q55758|PYRR_SYNY3	WP_138072311.1	22.297	148	101	7	9	153	6	142	0.18	28.1
sp|Q55758|PYRR_SYNY3	WP_030007782.1	24.648	142	94	5	11	145	30	165	0.19	28.1
sll5107	Q6ZEM3	cytidine deaminase			Purines, pyrimidines, nucleosides, and nucleotides	Purines, pyrimidines, nucleosides, and nucleotides
BLAST Output	PCC 11901 Accession	Percentage Identity	Alignment Length	Mismatches	Gap Open	Synechocystis sp. PCC 6803 Start	Synechocystis sp. PCC 6803 End	PCC 11901 Start	PCC 11901 End	E-value	Bit Score
tr|Q6ZEM3|Q6ZEM3_SYNY3	WP_138071585.1	30.000	70	34	3	2	63	321	383	0.31	27.3
slr6034	Q6YRX0	cytidine deaminase			Purines, pyrimidines, nucleosides, and nucleotides	Purines, pyrimidines, nucleosides, and nucleotides
BLAST Output	PCC 11901 Accession	Percentage Identity	Alignment Length	Mismatches	Gap Open	Synechocystis sp. PCC 6803 Start	Synechocystis sp. PCC 6803 End	PCC 11901 Start	PCC 11901 End	E-value	Bit Score
tr|Q6YRX0|Q6YRX0_SYNY3	WP_138071585.1	30.000	70	34	3	2	63	321	383	0.26	27.3
tr|Q6YRX0|Q6YRX0_SYNY3	WP_030007214.1	30.233	43	30	0	36	78	342	384	0.67	26.2
sll0509	Q55478	similar to 5',5'''-P-1,P-4-tetraphosphate phosphorylase II	nrdF		Purine ribonucleotide biosynthesis	Purines, pyrimidines, nucleosides, and nucleotides	Soluble proteins	0.931624332	33.9	0.0
BLAST Output	PCC 11901 Accession	Percentage Identity	Alignment Length	Mismatches	Gap Open	Synechocystis sp. PCC 6803 Start	Synechocystis sp. PCC 6803 End	PCC 11901 Start	PCC 11901 End	E-value	Bit Score
tr|Q55478|Q55478_SYNY3	WP_138071563.1	45.055	273	137	6	37	299	20	289	1.56e-65	204
Biosynthesis of vitamins and co-factors
Biotin biosynthesis
slr0886	P73574	3-oxoacyl-[acyl-carrier protein] reductase	fabG	fabG1, fabG	Fatty acid metabolism II	Fatty acid, phospholipid and sterol metabolism	Unknown	0.503170686	25.7	0.0
BLAST Output	PCC 11901 Accession	Percentage Identity	Alignment Length	Mismatches	Gap Open	Synechocystis sp. PCC 6803 Start	Synechocystis sp. PCC 6803 End	PCC 11901 Start	PCC 11901 End	E-value	Bit Score
sp|P73574|FABG_SYNY3	WP_138071343.1	77.049	244	56	0	4	247	11	254	3.16e-137	383
sp|P73574|FABG_SYNY3	WP_012305942.1	30.364	247	160	6	4	246	1	239	8.28e-26	98.2
sp|P73574|FABG_SYNY3	WP_138073537.1	28.182	220	151	4	9	221	4	223	1.32e-19	82.0
sp|P73574|FABG_SYNY3	WP_138073101.1	29.630	162	101	4	7	168	1777	1925	4.17e-12	62.4
sp|P73574|FABG_SYNY3	WP_138071622.1	28.421	190	117	7	4	186	407	584	5.94e-12	61.6
sp|P73574|FABG_SYNY3	WP_138072043.1	29.787	188	115	5	10	193	5	179	5.15e-11	57.4
sp|P73574|FABG_SYNY3	WP_012307288.1	23.664	262	171	8	1	243	1	252	2.74e-09	52.8
sp|P73574|FABG_SYNY3	WP_138073277.1	24.752	202	131	6	9	193	16	213	3.35e-09	52.8
sp|P73574|FABG_SYNY3	WP_138072337.1	25.000	248	162	10	9	242	3	240	1.05e-06	45.1
sp|P73574|FABG_SYNY3	WP_138073022.1	34.667	75	48	1	84	158	1030	1103	0.045	31.6
sp|P73574|FABG_SYNY3	WP_012306106.1	25.532	47	34	1	86	132	35	80	0.26	28.1
sp|P73574|FABG_SYNY3	WP_138072164.1	48.276	29	15	0	7	35	6	34	0.55	27.7
sll1605	P73848	(3R)-hydroxymyristol acyl carrier protein dehydrase	fabZ	fabZ, sefA	Fatty acid metabolism II	Fatty acid, phospholipid and sterol metabolism	Soluble proteins	0.899079695	18.1	0.0
BLAST Output	PCC 11901 Accession	Percentage Identity	Alignment Length	Mismatches	Gap Open	Synechocystis sp. PCC 6803 Start	Synechocystis sp. PCC 6803 End	PCC 11901 Start	PCC 11901 End	E-value	Bit Score
sp|P73848|FABZ_SYNY3	WP_012305711.1	69.784	139	42	0	26	164	15	153	5.67e-69	202
sp|P73848|FABZ_SYNY3	WP_138071692.1	34.694	49	20	2	97	145	165	201	0.23	27.7
sp|P73848|FABZ_SYNY3	WP_138073112.1	26.829	41	30	0	63	103	490	530	0.86	26.6
slr1051	P73016	enoyl-[acyl-carrier-protein] reductase	fabI	envM, fabI	Fatty acid metabolism II	Fatty acid, phospholipid and sterol metabolism	Unknown	0.516008257	27.6	0.0
BLAST Output	PCC 11901 Accession	Percentage Identity	Alignment Length	Mismatches	Gap Open	Synechocystis sp. PCC 6803 Start	Synechocystis sp. PCC 6803 End	PCC 11901 Start	PCC 11901 End	E-value	Bit Score
sp|P73016|FABI_SYNY3	WP_012307288.1	76.357	258	61	0	1	258	1	258	1.20e-152	422
sp|P73016|FABI_SYNY3	WP_138071343.1	27.027	259	160	9	4	252	11	250	1.20e-12	62.4
sp|P73016|FABI_SYNY3	WP_138073537.1	24.706	255	170	8	7	255	2	240	9.31e-10	54.3
sp|P73016|FABI_SYNY3	WP_012305942.1	28.295	258	160	13	4	255	1	239	1.17e-09	53.9
sp|P73016|FABI_SYNY3	WP_138071622.1	24.880	209	128	6	64	254	457	654	3.40e-04	38.1
sp|P73016|FABI_SYNY3	WP_138072337.1	22.167	203	127	7	63	250	53	239	0.20	28.9
sll1069	P73283	3-oxoacyl-[acyl-carrier-protein] synthase II	fabF	fabF, fabJ	Fatty acid metabolism II	Fatty acid, phospholipid and sterol metabolism	Soluble proteins	0.91523739	44.0	0.0
BLAST Output	PCC 11901 Accession	Percentage Identity	Alignment Length	Mismatches	Gap Open	Synechocystis sp. PCC 6803 Start	Synechocystis sp. PCC 6803 End	PCC 11901 Start	PCC 11901 End	E-value	Bit Score
sp|P73283|FABF_SYNY3	WP_012306650.1	77.644	416	93	0	1	416	1	416	0.0	670
sp|P73283|FABF_SYNY3	WP_138073044.1	36.364	275	163	4	142	416	116	378	5.36e-52	175
sp|P73283|FABF_SYNY3	WP_138073101.1	25.287	435	283	10	1	415	686	1098	1.59e-30	121
sp|P73283|FABF_SYNY3	WP_138073149.1	26.437	87	58	2	298	378	188	274	0.001	37.4
sp|P73283|FABF_SYNY3	WP_138072102.1	32.203	59	35	1	70	128	147	200	0.19	30.0
slr0355	Q55650	hypothetical protein	bioU	bioU	Random proteins (Hypothetical)	Random proteins (Hypothetical)	Soluble proteins	0.689451096	35.4	0.0
BLAST Output	PCC 11901 Accession	Percentage Identity	Alignment Length	Mismatches	Gap Open	Synechocystis sp. PCC 6803 Start	Synechocystis sp. PCC 6803 End	PCC 11901 Start	PCC 11901 End	E-value	Bit Score
sp|Q55650|BIOU_SYNY3	WP_138073653.1	75.962	312	74	1	21	331	17	328	3.57e-180	498
sp|Q55650|BIOU_SYNY3	WP_012306070.1	40.000	40	21	1	4	40	6	45	0.002	35.8
sp|Q55650|BIOU_SYNY3	WP_138073185.1	25.862	116	77	3	70	183	39	147	0.031	32.3
sp|Q55650|BIOU_SYNY3	WP_138073170.1	22.951	61	47	0	120	180	92	152	0.24	29.3
sp|Q55650|BIOU_SYNY3	WP_138073064.1	40.000	25	15	0	52	76	30	54	0.70	26.6
slr0917	P74770	7-keto-8-aminopelargonic acid synthetase	bioF	bioF	Biotin	Biosynthesis of cofactors, prosthetic groups, and carriers	Large ribosomal protein	0.839803485	47.7	0.0
BLAST Output	PCC 11901 Accession	Percentage Identity	Alignment Length	Mismatches	Gap Open	Synechocystis sp. PCC 6803 Start	Synechocystis sp. PCC 6803 End	PCC 11901 Start	PCC 11901 End	E-value	Bit Score
sp|P74770|BIOF_SYNY3	WP_138073164.1	61.637	391	145	1	1	391	1	386	2.07e-159	450
sp|P74770|BIOF_SYNY3	WP_138073538.1	34.722	360	229	3	30	387	730	1085	2.14e-62	213
sp|P74770|BIOF_SYNY3	WP_138073095.1	31.532	111	59	7	117	215	91	196	0.18	30.4
sp|P74770|BIOF_SYNY3	WP_138072400.1	37.500	32	20	0	194	225	51	82	0.71	28.5
slr0523	Q55849	similar to dethiobiotin synthetase	bioD	bioD	Biotin	Biosynthesis of cofactors, prosthetic groups, and carriers	Soluble proteins	0.929577259	25.8	0.0
BLAST Output	PCC 11901 Accession	Percentage Identity	Alignment Length	Mismatches	Gap Open	Synechocystis sp. PCC 6803 Start	Synechocystis sp. PCC 6803 End	PCC 11901 Start	PCC 11901 End	E-value	Bit Score
sp|Q55849|BIOD_SYNY3	WP_138071780.1	52.193	228	99	3	10	234	3	223	3.68e-76	227
sp|Q55849|BIOD_SYNY3	WP_138073154.1	26.207	145	96	6	90	230	350	487	0.35	28.5
slr1364	P73538	biotin synthetase	bioB	bioB	Biotin	Biosynthesis of cofactors, prosthetic groups, and carriers	Soluble proteins	0.733246374	39.3	0.0
BLAST Output	PCC 11901 Accession	Percentage Identity	Alignment Length	Mismatches	Gap Open	Synechocystis sp. PCC 6803 Start	Synechocystis sp. PCC 6803 End	PCC 11901 Start	PCC 11901 End	E-value	Bit Score
sp|P73538|BIOB_SYNY3	WP_181445679.1	75.429	350	81	1	13	362	21	365	0.0	538
sp|P73538|BIOB_SYNY3	WP_138073514.1	31.081	74	50	1	34	106	11	84	0.011	33.9
sp|P73538|BIOB_SYNY3	WP_138072288.1	26.506	83	55	2	108	190	185	261	0.48	28.9
sll1655	P72816	similar to biotin [acetyl-CoA-carboxylase] ligase		birA	Biotin	Biosynthesis of cofactors, prosthetic groups, and carriers
BLAST Output	PCC 11901 Accession	Percentage Identity	Alignment Length	Mismatches	Gap Open	Synechocystis sp. PCC 6803 Start	Synechocystis sp. PCC 6803 End	PCC 11901 Start	PCC 11901 End	E-value	Bit Score
tr|P72816|P72816_SYNY3	WP_138072041.1	45.887	231	116	3	45	270	30	256	5.13e-55	175
tr|P72816|P72816_SYNY3	WP_138071889.1	33.333	39	21	1	28	66	33	66	0.81	25.8
NAD biosynthesis
sll0631	P74562	L-aspartate oxidase	nadB	nadB	Nicotinate and nicotinamide biosynthesis	Biosynthesis of cofactors, prosthetic groups, and carriers	Soluble proteins	1.0	60.5	0.0
BLAST Output	PCC 11901 Accession	Percentage Identity	Alignment Length	Mismatches	Gap Open	Synechocystis sp. PCC 6803 Start	Synechocystis sp. PCC 6803 End	PCC 11901 Start	PCC 11901 End	E-value	Bit Score
sp|P74562|NADB_SYNY3	WP_138072242.1	64.259	540	185	4	4	541	9	542	0.0	668
sp|P74562|NADB_SYNY3	WP_138071585.1	34.982	566	316	19	5	538	3	548	3.85e-82	264
sll0622	P74578	quinolinate synthetase	nadA	nadA	Nicotinate and nicotinamide biosynthesis	Biosynthesis of cofactors, prosthetic groups, and carriers	Unknown	0.509274985	35.4	0.0
BLAST Output	PCC 11901 Accession	Percentage Identity	Alignment Length	Mismatches	Gap Open	Synechocystis sp. PCC 6803 Start	Synechocystis sp. PCC 6803 End	PCC 11901 Start	PCC 11901 End	E-value	Bit Score
sp|P74578|NADA_SYNY3	WP_012307578.1	75.570	307	75	0	12	318	14	320	0.0	498
sp|P74578|NADA_SYNY3	WP_138073696.1	30.159	63	43	1	127	189	2	63	0.88	26.9
slr0936	P74301	nicotinate-nucleotide pyrophosphorylase	nadC	nadC	Nicotinate and nicotinamide biosynthesis	Biosynthesis of cofactors, prosthetic groups, and carriers	Soluble proteins	0.914016022	32.0	0.0
BLAST Output	PCC 11901 Accession	Percentage Identity	Alignment Length	Mismatches	Gap Open	Synechocystis sp. PCC 6803 Start	Synechocystis sp. PCC 6803 End	PCC 11901 Start	PCC 11901 End	E-value	Bit Score
sp|P74301|NADC_SYNY3	WP_138072325.1	56.842	285	119	2	12	292	1	285	4.77e-117	335
sll1916	P73246	hypothetical protein	nadD	nadD	Nicotinate and nicotinamide biosynthesis	Biosynthesis of cofactors, prosthetic groups, and carriers	Soluble proteins	0.784457134	22.7	0.0
BLAST Output	PCC 11901 Accession	Percentage Identity	Alignment Length	Mismatches	Gap Open	Synechocystis sp. PCC 6803 Start	Synechocystis sp. PCC 6803 End	PCC 11901 Start	PCC 11901 End	E-value	Bit Score
sp|P73246|NADD_SYNY3	WP_181445657.1	48.241	199	89	3	2	200	7	191	4.19e-56	173
sp|P73246|NADD_SYNY3	WP_138073558.1	31.429	70	47	1	15	83	355	424	0.84	26.9
slr1691	P74292	glutamine-dependent NAD(+) synthetase	nadE	nadE, adgA	Nicotinate and nicotinamide biosynthesis	Biosynthesis of cofactors, prosthetic groups, and carriers	Soluble proteins	0.919386845	61.0	0.0
BLAST Output	PCC 11901 Accession	Percentage Identity	Alignment Length	Mismatches	Gap Open	Synechocystis sp. PCC 6803 Start	Synechocystis sp. PCC 6803 End	PCC 11901 Start	PCC 11901 End	E-value	Bit Score
sp|P74292|NADE_SYNY3	WP_138073461.1	58.865	564	213	3	4	550	3	564	0.0	667
sp|P74292|NADE_SYNY3	WP_138072347.1	28.767	73	49	2	282	354	3	72	0.007	35.0
sp|P74292|NADE_SYNY3	WP_138072669.1	22.222	126	90	2	5	123	11	135	0.010	34.7
sp|P74292|NADE_SYNY3	WP_173867208.1	38.710	31	19	0	295	325	221	251	0.85	28.9
slr0787	Q55928	hypothetical protein	nadM	nadM	Random proteins (Hypothetical)	Random proteins (Hypothetical)	Unknown	0.707807194	38.5	0.0
BLAST Output	PCC 11901 Accession	Percentage Identity	Alignment Length	Mismatches	Gap Open	Synechocystis sp. PCC 6803 Start	Synechocystis sp. PCC 6803 End	PCC 11901 Start	PCC 11901 End	E-value	Bit Score
sp|Q55928|NADM_SYNY3	WP_012307979.1	35.862	145	75	6	194	332	4	136	6.17e-13	63.9
sp|Q55928|NADM_SYNY3	WP_138072612.1	28.226	124	74	6	214	337	24	132	6.83e-04	36.2
sp|Q55928|NADM_SYNY3	WP_030006784.1	38.298	47	28	1	212	257	19	65	0.055	30.4
sp|Q55928|NADM_SYNY3	WP_012305950.1	33.871	62	28	2	8	64	3	56	0.11	30.0
slr0788	Q55929	similar to pre-B cell enhancing factor	nadV	nadV	Other	Other Categories
No hits
slr0400	P74430	hypothetical protein	nadK	slr0400	Random proteins (Hypothetical)	Random proteins (Hypothetical)	Soluble proteins	0.845638611	33.4	0.0
BLAST Output	PCC 11901 Accession	Percentage Identity	Alignment Length	Mismatches	Gap Open	Synechocystis sp. PCC 6803 Start	Synechocystis sp. PCC 6803 End	PCC 11901 Start	PCC 11901 End	E-value	Bit Score
sp|P74430|NADK1_SYNY3	WP_012305854.1	73.139	309	75	1	1	301	1	309	2.84e-170	471
sp|P74430|NADK1_SYNY3	WP_012308220.1	36.214	243	142	6	67	296	56	298	2.80e-35	126
sll1415	P73955	hypothetical protein	nadK	sll1415	Random proteins (Hypothetical)	Random proteins (Hypothetical)	Soluble proteins	0.919464641	33.8	0.0
BLAST Output	PCC 11901 Accession	Percentage Identity	Alignment Length	Mismatches	Gap Open	Synechocystis sp. PCC 6803 Start	Synechocystis sp. PCC 6803 End	PCC 11901 Start	PCC 11901 End	E-value	Bit Score
sp|P73955|NADK2_SYNY3	WP_012308220.1	68.525	305	96	0	1	305	1	305	7.36e-164	454
sp|P73955|NADK2_SYNY3	WP_012305854.1	36.134	238	139	7	56	293	75	299	8.04e-39	135
slr1239	P73496	pyridine nucleotide transhydrogenase alpha subunit	pntA	pntA	Nicotinate and nicotinamide biosynthesis	Biosynthesis of cofactors, prosthetic groups, and carriers	TM	0.934298669	56.0	4.0
BLAST Output	PCC 11901 Accession	Percentage Identity	Alignment Length	Mismatches	Gap Open	Synechocystis sp. PCC 6803 Start	Synechocystis sp. PCC 6803 End	PCC 11901 Start	PCC 11901 End	E-value	Bit Score
tr|P73496|P73496_SYNY3	WP_138073056.1	44.505	364	202	0	21	384	2	365	1.01e-99	303
tr|P73496|P73496_SYNY3	WP_138071832.1	30.086	349	203	9	21	356	2	322	2.36e-32	124
tr|P73496|P73496_SYNY3	WP_012306612.1	56.667	90	37	2	442	530	5	93	9.63e-23	89.4
slr1434	P73500	pyridine nucleotide transhydrogenase beta subunit	pntB	pntB	Nicotinate and nicotinamide biosynthesis	Biosynthesis of cofactors, prosthetic groups, and carriers	TM	0.914421984	49.9	9.0
BLAST Output	PCC 11901 Accession	Percentage Identity	Alignment Length	Mismatches	Gap Open	Synechocystis sp. PCC 6803 Start	Synechocystis sp. PCC 6803 End	PCC 11901 Start	PCC 11901 End	E-value	Bit Score
tr|P73500|P73500_SYNY3	WP_012306611.1	47.312	465	240	4	1	465	5	464	3.81e-134	392
tr|P73500|P73500_SYNY3	WP_138073085.1	27.624	181	99	8	62	238	248	400	0.11	31.2
Folate biosynthesis
slr1979	P74130	ADC synthase	pabB	trpE, pabB	Folate biosynthesis	Biosynthesis of cofactors, prosthetic groups, and carriers	Unknown	0.603857851	51.8	0.0
BLAST Output	PCC 11901 Accession	Percentage Identity	Alignment Length	Mismatches	Gap Open	Synechocystis sp. PCC 6803 Start	Synechocystis sp. PCC 6803 End	PCC 11901 Start	PCC 11901 End	E-value	Bit Score
sp|P74130|TRE2_SYNY3	WP_138072961.1	60.965	456	160	5	38	482	2	450	0.0	555
sp|P74130|TRE2_SYNY3	WP_138072689.1	38.106	454	228	9	79	485	57	504	1.44e-82	261
sp|P74130|TRE2_SYNY3	WP_138073781.1	26.331	338	239	6	151	482	122	455	3.21e-23	98.6
slr0887	P73575	hypothetical protein	pabC	slr0887	Folate biosynthesis	Biosynthesis of cofactors, prosthetic groups, and carriers	Soluble proteins	0.873759432	31.3	0.0
BLAST Output	PCC 11901 Accession	Percentage Identity	Alignment Length	Mismatches	Gap Open	Synechocystis sp. PCC 6803 Start	Synechocystis sp. PCC 6803 End	PCC 11901 Start	PCC 11901 End	E-value	Bit Score
tr|P73575|P73575_SYNY3	WP_138072339.1	47.083	240	126	1	1	240	3	241	1.90e-68	209
tr|P73575|P73575_SYNY3	WP_138073497.1	23.364	107	82	0	134	240	158	264	4.40e-05	40.4
tr|P73575|P73575_SYNY3	WP_138072297.1	32.394	71	39	1	7	77	87	148	0.63	26.9
tr|P73575|P73575_SYNY3	WP_138073869.1	34.211	76	41	4	24	99	425	491	0.83	27.7
slr0426	Q55759	GTP cyclohydrolase I	folE	folE, gchL	Folate biosynthesis	Biosynthesis of cofactors, prosthetic groups, and carriers	Soluble proteins	1.0	26.6	0.0
BLAST Output	PCC 11901 Accession	Percentage Identity	Alignment Length	Mismatches	Gap Open	Synechocystis sp. PCC 6803 Start	Synechocystis sp. PCC 6803 End	PCC 11901 Start	PCC 11901 End	E-value	Bit Score
sp|Q55759|GCH1_SYNY3	WP_012308040.1	76.569	239	49	2	1	233	1	238	3.54e-136	379
sp|Q55759|GCH1_SYNY3	WP_099238270.1	65.789	190	65	0	45	234	23	212	2.21e-96	277
sp|Q55759|GCH1_SYNY3	WP_062434213.1	23.438	64	49	0	115	178	42	105	0.008	32.3
slr0920	Q55381	mutator MutT protein	nudB		Poorly characterised	DNA replication, restriction, modification, recombination, and repair	Soluble proteins	0.715368505	17.4	0.0
BLAST Output	PCC 11901 Accession	Percentage Identity	Alignment Length	Mismatches	Gap Open	Synechocystis sp. PCC 6803 Start	Synechocystis sp. PCC 6803 End	PCC 11901 Start	PCC 11901 End	E-value	Bit Score
tr|Q55381|Q55381_SYNY3	WP_138072612.1	66.429	140	47	0	1	140	1	140	4.26e-69	202
tr|Q55381|Q55381_SYNY3	WP_012307979.1	37.984	129	73	4	5	127	9	136	4.43e-20	79.7
tr|Q55381|Q55381_SYNY3	WP_030006784.1	30.894	123	71	6	5	117	2	120	1.58e-05	38.9
tr|Q55381|Q55381_SYNY3	WP_138072728.1	52.381	21	10	0	23	43	126	146	0.39	26.9
tr|Q55381|Q55381_SYNY3	WP_030007882.1	32.558	43	22	2	114	149	81	123	0.67	26.2
slr1626	P74342	dihydroneopterin aldolase	folB	folB	Folate biosynthesis	Biosynthesis of cofactors, prosthetic groups, and carriers	Soluble proteins	0.695593592	13.1	0.0
BLAST Output	PCC 11901 Accession	Percentage Identity	Alignment Length	Mismatches	Gap Open	Synechocystis sp. PCC 6803 Start	Synechocystis sp. PCC 6803 End	PCC 11901 Start	PCC 11901 End	E-value	Bit Score
sp|P74342|FOLB_SYNY3	WP_099240287.1	26.531	98	72	0	1	98	7	104	2.83e-10	50.4
slr1093	P72736	2-amino-4-hydroxy-6-hydroxymethyldihydropteridine pyrophosphokinase	folK	folK	Folate biosynthesis	Biosynthesis of cofactors, prosthetic groups, and carriers
BLAST Output	PCC 11901 Accession	Percentage Identity	Alignment Length	Mismatches	Gap Open	Synechocystis sp. PCC 6803 Start	Synechocystis sp. PCC 6803 End	PCC 11901 Start	PCC 11901 End	E-value	Bit Score
sp|P72736|HPPK_SYNY3	WP_138071573.1	53.642	151	69	1	18	167	17	167	3.68e-50	157
sp|P72736|HPPK_SYNY3	WP_138072246.1	29.710	138	83	6	18	145	8	141	2.36e-10	53.9
sp|P72736|HPPK_SYNY3	WP_138071992.1	33.333	45	30	0	27	71	55	99	0.42	27.7
sp|P72736|HPPK_SYNY3	WP_138071142.1	30.769	39	27	0	124	162	17	55	1.00	25.0
slr2026	P73248	dihydropteroate synthase	folP	folP	Folate biosynthesis	Biosynthesis of cofactors, prosthetic groups, and carriers	Soluble proteins	0.796907314	31.6	0.0
BLAST Output	PCC 11901 Accession	Percentage Identity	Alignment Length	Mismatches	Gap Open	Synechocystis sp. PCC 6803 Start	Synechocystis sp. PCC 6803 End	PCC 11901 Start	PCC 11901 End	E-value	Bit Score
sp|P73248|DHPS_SYNY3	WP_138073174.1	61.594	276	106	0	14	289	3	278	1.64e-116	333
sll1612	P73842	folylpolyglutamate synthase	folC	folC, dedC	Folate biosynthesis	Biosynthesis of cofactors, prosthetic groups, and carriers	Soluble proteins	0.762384389	47.4	0.0
BLAST Output	PCC 11901 Accession	Percentage Identity	Alignment Length	Mismatches	Gap Open	Synechocystis sp. PCC 6803 Start	Synechocystis sp. PCC 6803 End	PCC 11901 Start	PCC 11901 End	E-value	Bit Score
tr|P73842|P73842_SYNY3	WP_138072357.1	49.292	424	198	5	3	422	6	416	2.13e-130	379
tr|P73842|P73842_SYNY3	WP_138072885.1	29.885	87	55	2	33	118	53	134	0.019	33.5
tr|P73842|P73842_SYNY3	WP_138073884.1	34.524	84	45	5	325	402	223	302	0.073	31.6
tr|P73842|P73842_SYNY3	WP_138071383.1	30.769	52	29	1	262	313	715	759	0.44	29.3
Molybdenum cofactor biosynthesis
slr0901	Q55369	molybdopterin biosynthesis protein A	moaA	moaA	Molybdopterin biosynthesis	Biosynthesis of cofactors, prosthetic groups, and carriers
BLAST Output	PCC 11901 Accession	Percentage Identity	Alignment Length	Mismatches	Gap Open	Synechocystis sp. PCC 6803 Start	Synechocystis sp. PCC 6803 End	PCC 11901 Start	PCC 11901 End	E-value	Bit Score
sp|Q55369|MOAA_SYNY3	WP_138073206.1	36.392	316	175	11	29	326	7	314	3.85e-50	166
sp|Q55369|MOAA_SYNY3	WP_138073260.1	33.333	93	44	5	10	97	17	96	0.004	35.0
sp|Q55369|MOAA_SYNY3	WP_138071466.1	38.235	34	19	1	20	51	257	290	0.19	29.6
sp|Q55369|MOAA_SYNY3	WP_138071510.1	41.463	41	22	1	91	129	211	251	0.44	28.9
slr0902	Q55370	molybdenum cofactor biosynthesis protein C, fused to molybdopterin-guanine dinucleotide biosynthesis protein MobA	moaC	moaC	Molybdopterin biosynthesis	Biosynthesis of cofactors, prosthetic groups, and carriers	Unknown	0.505100381	38.4	0.0
BLAST Output	PCC 11901 Accession	Percentage Identity	Alignment Length	Mismatches	Gap Open	Synechocystis sp. PCC 6803 Start	Synechocystis sp. PCC 6803 End	PCC 11901 Start	PCC 11901 End	E-value	Bit Score
sp|Q55370|MOCBA_SYNY3	WP_062435523.1	40.909	154	86	3	2	155	14	162	5.28e-30	109
sp|Q55370|MOCBA_SYNY3	WP_138071932.1	27.604	192	121	8	165	346	8	191	2.76e-09	52.8
sll1536	P74344	molybdopterin biosynthesis MoeB protein	moeB	moeB, chlN	Molybdopterin biosynthesis	Biosynthesis of cofactors, prosthetic groups, and carriers	Soluble proteins	0.935947103	42.7	0.0
BLAST Output	PCC 11901 Accession	Percentage Identity	Alignment Length	Mismatches	Gap Open	Synechocystis sp. PCC 6803 Start	Synechocystis sp. PCC 6803 End	PCC 11901 Start	PCC 11901 End	E-value	Bit Score
tr|P74344|P74344_SYNY3	WP_062432027.1	81.679	393	69	2	1	392	1	391	0.0	624
tr|P74344|P74344_SYNY3	WP_030007866.1	29.915	117	74	3	277	392	9	118	4.00e-06	42.4
tr|P74344|P74344_SYNY3	WP_099239993.1	28.431	102	62	4	281	381	8	99	1.88e-04	38.5
tr|P74344|P74344_SYNY3	WP_030007133.1	31.522	92	59	3	296	385	123	212	0.013	33.5
tr|P74344|P74344_SYNY3	WP_138071804.1	27.869	61	42	1	83	143	17	75	0.13	30.8
ssr1527	P74768	probable molybdopterin [MPT] converting factor, subunit 1	moaD	moaD, ssr1527	Molybdopterin biosynthesis	Biosynthesis of cofactors, prosthetic groups, and carriers
BLAST Output	PCC 11901 Accession	Percentage Identity	Alignment Length	Mismatches	Gap Open	Synechocystis sp. PCC 6803 Start	Synechocystis sp. PCC 6803 End	PCC 11901 Start	PCC 11901 End	E-value	Bit Score
tr|P74768|P74768_SYNY3	WP_012308187.1	28.736	87	44	4	5	81	7	85	4.75e-04	32.3
slr0903	Q55371	molybdopterin (MPT) converting factor, subunit 2	moaE	moaE	Molybdopterin biosynthesis	Biosynthesis of cofactors, prosthetic groups, and carriers	Unknown	0.648719611	16.5	0.0
BLAST Output	PCC 11901 Accession	Percentage Identity	Alignment Length	Mismatches	Gap Open	Synechocystis sp. PCC 6803 Start	Synechocystis sp. PCC 6803 End	PCC 11901 Start	PCC 11901 End	E-value	Bit Score
sp|Q55371|Y903_SYNY3	WP_065716571.1	36.765	136	85	1	6	140	11	146	1.25e-23	87.0
sp|Q55371|Y903_SYNY3	WP_138072414.1	35.135	37	23	1	25	60	374	410	0.33	27.3
slr0900	Q55368	molybdopterin biosynthesis MoeA protein	moeA	moeA	Molybdopterin biosynthesis	Biosynthesis of cofactors, prosthetic groups, and carriers	PM	0.773339069	43.4	0.0
BLAST Output	PCC 11901 Accession	Percentage Identity	Alignment Length	Mismatches	Gap Open	Synechocystis sp. PCC 6803 Start	Synechocystis sp. PCC 6803 End	PCC 11901 Start	PCC 11901 End	E-value	Bit Score
sp|Q55368|MOEA_SYNY3	WP_138072782.1	30.671	313	209	6	1	310	1	308	6.10e-36	132
sp|Q55368|MOEA_SYNY3	WP_138071692.1	58.333	24	9	1	346	369	159	181	0.87	27.7
Riboflavin and FAD biosynthesis
sll1894	P74104	riboflavin biosynthesis protein RibA	ribA	ribA	Riboflavin biosynthesis	Biosynthesis of cofactors, prosthetic groups, and carriers	Soluble proteins	0.83482812	61.6	0.0
BLAST Output	PCC 11901 Accession	Percentage Identity	Alignment Length	Mismatches	Gap Open	Synechocystis sp. PCC 6803 Start	Synechocystis sp. PCC 6803 End	PCC 11901 Start	PCC 11901 End	E-value	Bit Score
sp|P74104|RIBBA_SYNY3	WP_062432115.1	70.750	547	158	2	2	547	7	552	0.0	800
sp|P74104|RIBBA_SYNY3	WP_065710942.1	25.362	138	81	4	249	378	414	537	0.26	30.4
slr0066	Q55158	riboflavin biosynthesis protein RibD	ribD	ribD	Riboflavin biosynthesis	Biosynthesis of cofactors, prosthetic groups, and carriers	Soluble proteins	0.774389057	40.0	0.0
BLAST Output	PCC 11901 Accession	Percentage Identity	Alignment Length	Mismatches	Gap Open	Synechocystis sp. PCC 6803 Start	Synechocystis sp. PCC 6803 End	PCC 11901 Start	PCC 11901 End	E-value	Bit Score
sp|Q55158|RIBD_SYNY3	WP_138073262.1	59.887	354	142	0	4	357	13	366	1.53e-154	436
sp|Q55158|RIBD_SYNY3	WP_138072470.1	26.549	226	148	7	143	356	1	220	2.89e-06	44.3
sp|Q55158|RIBD_SYNY3	WP_062436634.1	33.333	108	54	6	8	105	1	100	6.01e-05	39.3
sp|Q55158|RIBD_SYNY3	WP_138073922.1	25.688	109	60	3	218	320	48	141	0.42	28.9
sll1282	P73527	riboflavin synthase beta subunit	ribH	ribH, ribE	Riboflavin biosynthesis	Biosynthesis of cofactors, prosthetic groups, and carriers
BLAST Output	PCC 11901 Accession	Percentage Identity	Alignment Length	Mismatches	Gap Open	Synechocystis sp. PCC 6803 Start	Synechocystis sp. PCC 6803 End	PCC 11901 Start	PCC 11901 End	E-value	Bit Score
sp|P73527|RISB_SYNY3	WP_012305775.1	70.968	155	45	0	1	155	1	155	3.54e-86	246
sp|P73527|RISB_SYNY3	WP_030007827.1	38.462	39	17	1	73	111	123	154	0.29	27.3
sll0300	Q55532	riboflavin synthase alpha chain	ribC	ribC	Riboflavin biosynthesis	Biosynthesis of cofactors, prosthetic groups, and carriers
BLAST Output	PCC 11901 Accession	Percentage Identity	Alignment Length	Mismatches	Gap Open	Synechocystis sp. PCC 6803 Start	Synechocystis sp. PCC 6803 End	PCC 11901 Start	PCC 11901 End	E-value	Bit Score
tr|Q55532|Q55532_SYNY3	WP_138073680.1	59.471	227	89	2	1	225	1	226	2.85e-90	262
tr|Q55532|Q55532_SYNY3	WP_138072885.1	37.500	40	24	1	124	163	151	189	0.005	33.9
tr|Q55532|Q55532_SYNY3	WP_138071525.1	23.944	142	85	5	49	178	77	207	0.48	27.7
slr1882	P73651	riboflavin biosynthesis protein RibF	ribF	ribF	Riboflavin biosynthesis	Biosynthesis of cofactors, prosthetic groups, and carriers	PM	0.861485551	34.4	0.0
BLAST Output	PCC 11901 Accession	Percentage Identity	Alignment Length	Mismatches	Gap Open	Synechocystis sp. PCC 6803 Start	Synechocystis sp. PCC 6803 End	PCC 11901 Start	PCC 11901 End	E-value	Bit Score
sp|P73651|RIBF_SYNY3	WP_138071373.1	55.894	263	115	1	17	278	58	320	1.23e-93	276
sp|P73651|RIBF_SYNY3	WP_138073846.1	35.897	39	24	1	9	46	160	198	0.43	28.5
sp|P73651|RIBF_SYNY3	WP_138071073.1	28.037	107	59	4	84	178	134	234	0.73	27.7
Thiamin biosynthesis
slr0118	Q55894	thiamine biosynthesis protein ThiC	thiC	thiC	Thiamin biosynthesis	Biosynthesis of cofactors, prosthetic groups, and carriers	Soluble proteins	0.908037874	51.1	0.0
BLAST Output	PCC 11901 Accession	Percentage Identity	Alignment Length	Mismatches	Gap Open	Synechocystis sp. PCC 6803 Start	Synechocystis sp. PCC 6803 End	PCC 11901 Start	PCC 11901 End	E-value	Bit Score
sp|Q55894|THIC_SYNY3	WP_012306459.1	90.444	450	43	0	1	450	1	450	0.0	866
slr0633	Q55710	thiamine biosynthesis protein ThiG	thiG	thiG	Thiamin biosynthesis	Biosynthesis of cofactors, prosthetic groups, and carriers	Unknown	0.608320838	70.2	0.0
BLAST Output	PCC 11901 Accession	Percentage Identity	Alignment Length	Mismatches	Gap Open	Synechocystis sp. PCC 6803 Start	Synechocystis sp. PCC 6803 End	PCC 11901 Start	PCC 11901 End	E-value	Bit Score
sp|Q55710|THIOG_SYNY3	WP_138073476.1	64.063	640	218	6	23	655	21	655	0.0	820
sp|Q55710|THIOG_SYNY3	WP_138071333.1	30.435	368	226	10	7	349	5	367	3.88e-28	113
sp|Q55710|THIOG_SYNY3	WP_012305900.1	42.857	49	28	0	579	627	256	304	0.009	35.4
sp|Q55710|THIOG_SYNY3	WP_138072667.1	30.864	81	50	3	138	217	69	144	0.065	32.3
sp|Q55710|THIOG_SYNY3	WP_138071960.1	38.710	31	19	0	580	610	181	211	0.11	31.2
sp|Q55710|THIOG_SYNY3	WP_138071585.1	32.143	56	37	1	6	60	5	60	0.14	31.6
sp|Q55710|THIOG_SYNY3	WP_138072865.1	29.032	62	43	1	148	208	212	273	0.36	30.0
sp|Q55710|THIOG_SYNY3	WP_138072325.1	30.769	65	42	2	551	614	168	230	0.69	28.9
sp|Q55710|THIOG_SYNY3	WP_138071818.1	33.333	48	24	1	104	143	298	345	0.77	29.3
sp|Q55710|THIOG_SYNY3	WP_012306193.1	41.935	31	18	0	580	610	206	236	0.93	28.5
sll0635	P72965	probable thiamine-phosphate pyrophosphorylase	thiE	thiE	Thiamin biosynthesis	Biosynthesis of cofactors, prosthetic groups, and carriers	Soluble proteins	0.928478938	37.9	0.0
BLAST Output	PCC 11901 Accession	Percentage Identity	Alignment Length	Mismatches	Gap Open	Synechocystis sp. PCC 6803 Start	Synechocystis sp. PCC 6803 End	PCC 11901 Start	PCC 11901 End	E-value	Bit Score
sp|P72965|THIE_SYNY3	WP_138072226.1	67.365	334	109	0	7	340	10	343	1.83e-165	462
sp|P72965|THIE_SYNY3	WP_138072226.1	42.553	47	25	1	2	48	80	124	0.003	35.4
sp|P72965|THIE_SYNY3	WP_138071111.1	26.923	78	54	1	58	132	596	673	0.32	29.3
sp|P72965|THIE_SYNY3	WP_030007371.1	42.857	28	16	0	141	168	13	40	0.91	25.8
slr1787	P72787	thiamine-monophosphate kinase	thiL	rpoB	Thiamin biosynthesis	Biosynthesis of cofactors, prosthetic groups, and carriers	Unknown	0.60957876	37.6	0.0
BLAST Output	PCC 11901 Accession	Percentage Identity	Alignment Length	Mismatches	Gap Open	Synechocystis sp. PCC 6803 Start	Synechocystis sp. PCC 6803 End	PCC 11901 Start	PCC 11901 End	E-value	Bit Score
tr|P72787|P72787_SYNY3	WP_138073151.1	50.000	332	158	2	34	364	5	329	1.27e-104	308
tr|P72787|P72787_SYNY3	WP_168191166.1	24.242	264	162	10	96	353	71	302	3.58e-06	44.7
tr|P72787|P72787_SYNY3	WP_138073376.1	25.824	182	112	8	106	269	498	674	0.007	35.0
tr|P72787|P72787_SYNY3	WP_138071796.1	22.318	233	151	5	59	281	428	640	0.013	33.9
tr|P72787|P72787_SYNY3	WP_138072144.1	24.306	144	99	3	57	195	43	181	0.25	29.6
Pantothenate and coenzyme A biosynthesis
slr0526	P52997	3-methyl-2-oxobutanoate hydroxymethyltransferase	panB	panB	Pantothenate biosynthesis	Biosynthesis of cofactors, prosthetic groups, and carriers	Unknown	0.6290269	27.8	0.0
BLAST Output	PCC 11901 Accession	Percentage Identity	Alignment Length	Mismatches	Gap Open	Synechocystis sp. PCC 6803 Start	Synechocystis sp. PCC 6803 End	PCC 11901 Start	PCC 11901 End	E-value	Bit Score
sp|P52997|PANB_SYNY3	WP_065710927.1	66.537	257	86	0	1	257	1	257	1.33e-124	352
sll1363	P29107	ketol-acid reductoisomerase	ilvC	ilvC	Isoleucine, valine, leucine biosynthesis	Amino acid biosynthesis	Soluble proteins	0.893474412	39.9	0.0
BLAST Output	PCC 11901 Accession	Percentage Identity	Alignment Length	Mismatches	Gap Open	Synechocystis sp. PCC 6803 Start	Synechocystis sp. PCC 6803 End	PCC 11901 Start	PCC 11901 End	E-value	Bit Score
sp|P29107|ILVC_SYNY3	WP_012306898.1	83.939	330	53	0	1	330	1	330	0.0	552
sp|P29107|ILVC_SYNY3	WP_138073324.1	35.294	68	42	2	18	83	3	70	0.042	31.6
sp|P29107|ILVC_SYNY3	WP_065711043.1	46.875	32	17	0	14	45	216	247	0.43	28.9
sp|P29107|ILVC_SYNY3	WP_138071426.1	25.581	129	88	4	108	230	486	612	0.50	28.5
sll0892	Q55382	aspartate 1-decarboxylase	panD	panD	Pantothenate biosynthesis	Biosynthesis of cofactors, prosthetic groups, and carriers	Soluble proteins	0.797240116	16.1	0.0
BLAST Output	PCC 11901 Accession	Percentage Identity	Alignment Length	Mismatches	Gap Open	Synechocystis sp. PCC 6803 Start	Synechocystis sp. PCC 6803 End	PCC 11901 Start	PCC 11901 End	E-value	Bit Score
sp|Q55382|PAND_SYNY3	WP_138071531.1	57.813	128	54	0	1	128	1	128	1.05e-50	155
sp|Q55382|PAND_SYNY3	WP_181445674.1	48.718	39	20	0	90	128	3	41	8.39e-07	40.8
sp|Q55382|PAND_SYNY3	WP_138073065.1	36.170	47	29	1	43	88	47	93	0.019	30.4
sp|Q55382|PAND_SYNY3	WP_138073708.1	30.233	86	48	3	55	129	58	142	0.072	29.3
sll1249	Q55074	pantothenate synthetase/cytidylate kinase	panC	panC, kcy	Pantothenate biosynthesis	Biosynthesis of cofactors, prosthetic groups, and carriers	Soluble proteins	0.899764709	55.4	0.0
BLAST Output	PCC 11901 Accession	Percentage Identity	Alignment Length	Mismatches	Gap Open	Synechocystis sp. PCC 6803 Start	Synechocystis sp. PCC 6803 End	PCC 11901 Start	PCC 11901 End	E-value	Bit Score
sp|Q55074|PANCY_SYNY3	WP_138072293.1	60.311	514	196	4	2	513	1	508	0.0	588
sp|Q55074|PANCY_SYNY3	WP_030007725.1	37.288	59	33	2	267	324	12	67	0.011	34.3
sp|Q55074|PANCY_SYNY3	WP_012306671.1	41.935	31	18	0	296	326	11	41	0.093	30.8
sp|Q55074|PANCY_SYNY3	WP_138073696.1	45.714	35	16	1	285	316	20	54	0.11	30.4
sp|Q55074|PANCY_SYNY3	WP_012308260.1	38.710	31	19	0	288	318	7	37	0.70	28.9
sp|Q55074|PANCY_SYNY3	WP_138073912.1	39.583	48	23	3	278	323	15	58	0.93	28.1
slr0812	P74045	hypothetical protein - pantothenate kinase (type III)		coaX (panK)	Coenzyme A biosynthesis	Biosynthesis of cofactors, prosthetic groups, and carriers	Soluble proteins	0.7857751	27.7	0.0
BLAST Output	PCC 11901 Accession	Percentage Identity	Alignment Length	Mismatches	Gap Open	Synechocystis sp. PCC 6803 Start	Synechocystis sp. PCC 6803 End	PCC 11901 Start	PCC 11901 End	E-value	Bit Score
sp|P74045|COAX_SYNY3	WP_138073701.1	47.845	232	106	7	20	249	4	222	1.49e-57	180
sll0250	P73881	pantothenate metabolism flavoprotein		dfp	Coenzyme A biosynthesis	Biosynthesis of cofactors, prosthetic groups, and carriers	Unknown	0.634990156	43.4	0.0
BLAST Output	PCC 11901 Accession	Percentage Identity	Alignment Length	Mismatches	Gap Open	Synechocystis sp. PCC 6803 Start	Synechocystis sp. PCC 6803 End	PCC 11901 Start	PCC 11901 End	E-value	Bit Score
sp|P73881|COABC_SYNY3	WP_138073241.1	55.335	403	172	2	1	398	1	400	7.87e-168	473
sp|P73881|COABC_SYNY3	WP_138073278.1	38.776	49	24	2	119	161	301	349	0.004	35.4
sp|P73881|COABC_SYNY3	WP_065710153.1	25.600	125	68	3	263	371	89	204	0.035	32.3
sp|P73881|COABC_SYNY3	WP_138071818.1	40.476	42	25	0	333	374	230	271	0.36	29.3
sp|P73881|COABC_SYNY3	WP_138072134.1	30.682	88	52	3	202	285	241	323	0.61	28.5
slr0847	Q55435	phosphopantetheine adenylytransferase		kdtB	Coenzyme A biosynthesis	Biosynthesis of cofactors, prosthetic groups, and carriers	Soluble proteins	0.830745284	17.6	0.0
BLAST Output	PCC 11901 Accession	Percentage Identity	Alignment Length	Mismatches	Gap Open	Synechocystis sp. PCC 6803 Start	Synechocystis sp. PCC 6803 End	PCC 11901 Start	PCC 11901 End	E-value	Bit Score
sp|Q55435|COAD_SYNY3	WP_012305950.1	78.205	156	34	0	1	156	1	156	5.07e-91	259
sp|Q55435|COAD_SYNY3	WP_181445657.1	25.316	158	86	5	2	157	8	135	0.001	34.3
sp|Q55435|COAD_SYNY3	WP_012306372.1	31.707	41	28	0	25	65	302	342	0.031	30.4
sp|Q55435|COAD_SYNY3	WP_138071978.1	28.986	69	42	2	81	146	53	117	0.28	27.3
slr0553	Q55515	hypothetical protein - dephosphocoenzyme A kinase		coaE	Coenzyme A biosynthesis	Biosynthesis of cofactors, prosthetic groups, and carriers	Unknown	0.544422457	22.5	0.0
BLAST Output	PCC 11901 Accession	Percentage Identity	Alignment Length	Mismatches	Gap Open	Synechocystis sp. PCC 6803 Start	Synechocystis sp. PCC 6803 End	PCC 11901 Start	PCC 11901 End	E-value	Bit Score
sp|Q55515|COAE_SYNY3	WP_138071766.1	61.735	196	71	2	3	197	7	199	2.13e-79	232
Pyridoxine biosynthesis
sll0660		pyridoxal phosphate biosynthetic protein PdxA	pdxA	pdxA	Pyridoxine biosynthesis	Biosynthesis of cofactors, prosthetic groups, and carriers	Unknown	0.61547083	37.2	0.0
BLAST Output	PCC 11901 Accession	Percentage Identity	Alignment Length	Mismatches	Gap Open	Synechocystis sp. PCC 6803 Start	Synechocystis sp. PCC 6803 End	PCC 11901 Start	PCC 11901 End	E-value	Bit Score
sp|Q55982|PDXA_SYNY3	WP_138072679.1	60.767	339	130	3	8	344	4	341	7.19e-139	395
sp|Q55982|PDXA_SYNY3	WP_012305854.1	28.283	99	46	6	67	155	98	181	0.42	28.9
slr1779	P72776	pyridoxal phosphate biosynthetic protein PdxJ	pdxJ	pdxJ	Pyridoxine biosynthesis	Biosynthesis of cofactors, prosthetic groups, and carriers	Soluble proteins	1.0	26.4	0.0
BLAST Output	PCC 11901 Accession	Percentage Identity	Alignment Length	Mismatches	Gap Open	Synechocystis sp. PCC 6803 Start	Synechocystis sp. PCC 6803 End	PCC 11901 Start	PCC 11901 End	E-value	Bit Score
sp|P72776|PDXJ_SYNY3	WP_138072057.1	70.588	238	69	1	2	239	8	244	1.05e-118	335
sll1440	P74211	pyridoxamine 5'-phosphate oxidase	pdxH	pdxH	Pyridoxine biosynthesis	Biosynthesis of cofactors, prosthetic groups, and carriers	Soluble proteins	0.73210253	26.4	0.0
BLAST Output	PCC 11901 Accession	Percentage Identity	Alignment Length	Mismatches	Gap Open	Synechocystis sp. PCC 6803 Start	Synechocystis sp. PCC 6803 End	PCC 11901 Start	PCC 11901 End	E-value	Bit Score
sp|P74211|PDXH_SYNY3	WP_138071624.1	56.398	211	90	2	6	214	5	215	8.64e-82	239
Membrane and cell wall biosynthesis
Lipid biosynthesis
sll0728	P74638	acetyl-CoA carboxylase alpha subunit	accA	accA	Fatty acid metabolism I	Fatty acid, phospholipid and sterol metabolism	Unknown	0.690850995	36.0	0.0
BLAST Output	PCC 11901 Accession	Percentage Identity	Alignment Length	Mismatches	Gap Open	Synechocystis sp. PCC 6803 Start	Synechocystis sp. PCC 6803 End	PCC 11901 Start	PCC 11901 End	E-value	Bit Score
sp|P74638|ACCA_SYNY3	WP_065711266.1	75.077	325	81	0	1	325	1	325	2.51e-178	493
slr0435	Q55120	biotin carboxyl carrier protein of acetyl-CoA carboxylase	accB	accB, fabE	Fatty acid metabolism I	Fatty acid, phospholipid and sterol metabolism	Soluble proteins	0.866839124	16.3	0.0
BLAST Output	PCC 11901 Accession	Percentage Identity	Alignment Length	Mismatches	Gap Open	Synechocystis sp. PCC 6803 Start	Synechocystis sp. PCC 6803 End	PCC 11901 Start	PCC 11901 End	E-value	Bit Score
tr|Q55120|Q55120_SYNY3	WP_138072009.1	58.788	165	56	6	1	154	1	164	1.80e-59	179
tr|Q55120|Q55120_SYNY3	WP_138072200.1	28.571	84	56	1	3	86	564	643	0.011	32.0
tr|Q55120|Q55120_SYNY3	WP_138072065.1	32.000	50	34	0	103	152	27	76	0.058	29.6
sll0053	Q55160	biotin carboxylase	accC	accC, fabG	Fatty acid metabolism I	Fatty acid, phospholipid and sterol metabolism	Unknown	0.622434078	49.1	0.0
BLAST Output	PCC 11901 Accession	Percentage Identity	Alignment Length	Mismatches	Gap Open	Synechocystis sp. PCC 6803 Start	Synechocystis sp. PCC 6803 End	PCC 11901 Start	PCC 11901 End	E-value	Bit Score
tr|Q55160|Q55160_SYNY3	WP_012307729.1	78.571	448	96	0	1	448	1	448	0.0	746
tr|Q55160|Q55160_SYNY3	WP_030007634.1	23.932	351	222	15	5	329	9	340	1.32e-11	63.2
tr|Q55160|Q55160_SYNY3	WP_030007634.1	26.244	221	126	8	105	309	670	869	8.61e-10	57.4
tr|Q55160|Q55160_SYNY3	WP_030007214.1	20.492	244	142	7	90	293	54	285	2.01e-04	39.7
tr|Q55160|Q55160_SYNY3	WP_138073549.1	37.209	43	25	1	117	159	511	551	0.14	31.2
tr|Q55160|Q55160_SYNY3	WP_030006701.1	23.490	149	103	6	148	293	138	278	0.23	30.0
tr|Q55160|Q55160_SYNY3	WP_138071583.1	25.926	81	52	3	94	168	154	232	0.37	29.6
sll0336	Q57417	acetyl-CoA carboxylase beta subunit	accD	accD, ycf11, zfpA, zfp	Fatty acid metabolism I	Fatty acid, phospholipid and sterol metabolism	Unknown	0.580978756	36.4	0.0
BLAST Output	PCC 11901 Accession	Percentage Identity	Alignment Length	Mismatches	Gap Open	Synechocystis sp. PCC 6803 Start	Synechocystis sp. PCC 6803 End	PCC 11901 Start	PCC 11901 End	E-value	Bit Score
sp|Q57417|ACCD_SYNY3	WP_062431589.1	76.768	297	65	3	1	296	1	294	8.67e-170	471
sp|Q57417|ACCD_SYNY3	WP_138073596.1	36.585	41	25	1	25	65	323	362	0.20	29.6
sp|Q57417|ACCD_SYNY3	WP_138073652.1	36.585	41	25	1	25	65	323	362	0.21	29.6
slr2023	P73242	malonyl coenzyme A-acyl carrier protein transacylase	fabD	fabD, tfpA	Fatty acid metabolism II	Fatty acid, phospholipid and sterol metabolism	Soluble proteins	0.810305539	31.5	0.0
BLAST Output	PCC 11901 Accession	Percentage Identity	Alignment Length	Mismatches	Gap Open	Synechocystis sp. PCC 6803 Start	Synechocystis sp. PCC 6803 End	PCC 11901 Start	PCC 11901 End	E-value	Bit Score
sp|P73242|FABD_SYNY3	WP_138071569.1	60.839	286	112	0	2	287	3	288	3.17e-124	353
sp|P73242|FABD_SYNY3	WP_138073101.1	30.104	289	181	9	2	276	1194	1475	4.24e-29	113
sp|P73242|FABD_SYNY3	WP_138072178.1	33.333	57	35	1	84	137	326	382	0.41	28.5
sp|P73242|FABD_SYNY3	WP_138073638.1	28.261	92	55	5	131	215	195	282	0.93	27.3
sp|P73242|FABD_SYNY3	WP_099240001.1	30.769	52	25	2	45	93	24	67	0.93	25.8
ssl2084	P20804	acyl carrier protein	acpP	acpP, acp, ssl2084	Fatty acid metabolism II	Fatty acid, phospholipid and sterol metabolism	Soluble proteins	0.791170443	8.6	0.0
BLAST Output	PCC 11901 Accession	Percentage Identity	Alignment Length	Mismatches	Gap Open	Synechocystis sp. PCC 6803 Start	Synechocystis sp. PCC 6803 End	PCC 11901 Start	PCC 11901 End	E-value	Bit Score
sp|P20804|ACP_SYNY3	WP_012306651.1	67.532	77	25	0	1	77	1	77	1.10e-31	102
sp|P20804|ACP_SYNY3	WP_138073538.1	26.786	56	40	1	4	59	591	645	0.019	28.9
sp|P20804|ACP_SYNY3	WP_138073101.1	23.729	59	43	2	5	62	2033	2090	0.59	24.6
slr0495	Q55185	HetI protein homolog	acpT		Random proteins (Membranes, lipoproteins, and porins)	Cell Envelope
BLAST Output	PCC 11901 Accession	Percentage Identity	Alignment Length	Mismatches	Gap Open	Synechocystis sp. PCC 6803 Start	Synechocystis sp. PCC 6803 End	PCC 11901 Start	PCC 11901 End	E-value	Bit Score
sp|Q55185|Y495_SYNY3	WP_138073588.1	36.691	139	80	2	23	158	24	157	7.66e-19	79.0
slr1511	P73951	3-oxoacyl-[acyl-carrier-protein] synthase III	fabH	fabH	Fatty acid metabolism II	Fatty acid, phospholipid and sterol metabolism	Soluble proteins	0.769338158	35.1	0.0
BLAST Output	PCC 11901 Accession	Percentage Identity	Alignment Length	Mismatches	Gap Open	Synechocystis sp. PCC 6803 Start	Synechocystis sp. PCC 6803 End	PCC 11901 Start	PCC 11901 End	E-value	Bit Score
sp|P73951|FABH_SYNY3	WP_138073762.1	61.818	330	126	0	1	330	1	330	8.56e-152	426
slr0886	P73574	3-oxoacyl-[acyl-carrier protein] reductase	fabG	fabG1, fabG	Fatty acid metabolism II	Fatty acid, phospholipid and sterol metabolism	Unknown	0.503170686	25.7	0.0
BLAST Output	PCC 11901 Accession	Percentage Identity	Alignment Length	Mismatches	Gap Open	Synechocystis sp. PCC 6803 Start	Synechocystis sp. PCC 6803 End	PCC 11901 Start	PCC 11901 End	E-value	Bit Score
sp|P73574|FABG_SYNY3	WP_138071343.1	77.049	244	56	0	4	247	11	254	3.16e-137	383
sp|P73574|FABG_SYNY3	WP_012305942.1	30.364	247	160	6	4	246	1	239	8.28e-26	98.2
sp|P73574|FABG_SYNY3	WP_138073537.1	28.182	220	151	4	9	221	4	223	1.32e-19	82.0
sp|P73574|FABG_SYNY3	WP_138073101.1	29.630	162	101	4	7	168	1777	1925	4.17e-12	62.4
sp|P73574|FABG_SYNY3	WP_138071622.1	28.421	190	117	7	4	186	407	584	5.94e-12	61.6
sp|P73574|FABG_SYNY3	WP_138072043.1	29.787	188	115	5	10	193	5	179	5.15e-11	57.4
sp|P73574|FABG_SYNY3	WP_012307288.1	23.664	262	171	8	1	243	1	252	2.74e-09	52.8
sp|P73574|FABG_SYNY3	WP_138073277.1	24.752	202	131	6	9	193	16	213	3.35e-09	52.8
sp|P73574|FABG_SYNY3	WP_138072337.1	25.000	248	162	10	9	242	3	240	1.05e-06	45.1
sp|P73574|FABG_SYNY3	WP_138073022.1	34.667	75	48	1	84	158	1030	1103	0.045	31.6
sp|P73574|FABG_SYNY3	WP_012306106.1	25.532	47	34	1	86	132	35	80	0.26	28.1
sp|P73574|FABG_SYNY3	WP_138072164.1	48.276	29	15	0	7	35	6	34	0.55	27.7
sll1605	P73848	(3R)-hydroxymyristol acyl carrier protein dehydrase	fabZ	fabZ, sefA	Fatty acid metabolism II	Fatty acid, phospholipid and sterol metabolism	Soluble proteins	0.899079695	18.1	0.0
BLAST Output	PCC 11901 Accession	Percentage Identity	Alignment Length	Mismatches	Gap Open	Synechocystis sp. PCC 6803 Start	Synechocystis sp. PCC 6803 End	PCC 11901 Start	PCC 11901 End	E-value	Bit Score
sp|P73848|FABZ_SYNY3	WP_012305711.1	69.784	139	42	0	26	164	15	153	5.67e-69	202
sp|P73848|FABZ_SYNY3	WP_138071692.1	34.694	49	20	2	97	145	165	201	0.23	27.7
sp|P73848|FABZ_SYNY3	WP_138073112.1	26.829	41	30	0	63	103	490	530	0.86	26.6
slr1051	P73016	enoyl-[acyl-carrier-protein] reductase	fabI	envM, fabI	Fatty acid metabolism II	Fatty acid, phospholipid and sterol metabolism	Unknown	0.516008257	27.6	0.0
BLAST Output	PCC 11901 Accession	Percentage Identity	Alignment Length	Mismatches	Gap Open	Synechocystis sp. PCC 6803 Start	Synechocystis sp. PCC 6803 End	PCC 11901 Start	PCC 11901 End	E-value	Bit Score
[truncated: 3,193 more rows]

## Sheet: Key
Amino acid biosynthesis
Biosynthesis of cofactors, prosthetic groups, and carriers
Cell Envelope
Cellular Processes
Central Intermediary Metabolism
DNA replication, restriction, modification, recombination, and repair
Energy Metabolism
Fatty acid, phospholipid and sterol metabolism
Other Categories
Photosynthesis & Respiration
Purines, pyrimidines, nucleosides, and nucleotides
Random proteins (Hypothetical)
Regulatory Functions
Transcription / Translation
Transport & Binding Proteins
Unknown Proteins
