# Supplementary material for: Development of a Biotechnology Platform for the Fast-Growing Cyanobacterium Synechococcus sp. PCC 11901
Source: Biomolecules. 2022 Jun 23;12(7):872. doi: 10.3390/biom12070872 (PMC9313322; doi:10.3390/biom12070872)
Supplement: Supplementary file 1 [file biomolecules-12-00872-s001.zip › Table S4.xlsx]

## Sheet: Sheet1
Accession	Uniprot Accession	Gene Product	Gene Name	Gene names in Literature	Functional Sub-Category	Functional Category	Localisation	Svm Score	MW (kDa)	No. of TMHs
Table S4: PCC 11910 homologues of PCC 6803 proteins involved in processes other than central metabolism, light harvesting and photosynthesis, and proteins of unknown function.
sll0088	Q55789	hypothetical protein		sufR	Iron-sulfur cluster biosynthesis	Amino acid biosynthesis	Soluble proteins	0.70683372	27.4	0.0
BLAST Output	PCC 11901 Accession	Percentage Identity	Alignment Length	Mismatches	Gap Open	Synechocystis sp. PCC 6803 Start	Synechocystis sp. PCC 6803 End	PCC 11901 Start	PCC 11901 End	E-value	Bit Score
tr|Q55789|Q55789_SYNY3	WP_138073472.1	56.682	217	94	0	21	237	1	217	1.48e-96	278
tr|Q55789|Q55789_SYNY3	WP_030007861.1	34.043	47	29	1	57	103	57	101	0.68	26.6
slr0899	Q55367	cyanate lyase	cynS	cynS	Random proteins (Glutamate family / Nitrogen assimilation)	Amino acid biosynthesis	Soluble proteins	0.896399007	16.5	0.0
BLAST Output	PCC 11901 Accession	Percentage Identity	Alignment Length	Mismatches	Gap Open	Synechocystis sp. PCC 6803 Start	Synechocystis sp. PCC 6803 End	PCC 11901 Start	PCC 11901 End	E-value	Bit Score
sp|Q55367|CYNS_SYNY3	WP_138072869.1	68.276	145	45	1	6	149	3	147	1.38e-70	206
sp|Q55367|CYNS_SYNY3	WP_138072637.1	66.897	145	47	1	6	149	3	147	6.31e-69	201
slr2143	P73679	L-cysteine/cystine lyase			Random proteins (Glutamate family / Nitrogen assimilation)	Amino acid biosynthesis	Soluble proteins	0.889127027	44.0	0.0
BLAST Output	PCC 11901 Accession	Percentage Identity	Alignment Length	Mismatches	Gap Open	Synechocystis sp. PCC 6803 Start	Synechocystis sp. PCC 6803 End	PCC 11901 Start	PCC 11901 End	E-value	Bit Score
tr|P73679|P73679_SYNY3	WP_138071295.1	50.761	394	182	2	6	399	3	384	2.57e-140	402
tr|P73679|P73679_SYNY3	WP_065716658.1	24.862	362	221	15	11	347	14	349	2.80e-17	79.7
tr|P73679|P73679_SYNY3	WP_138072935.1	23.256	172	110	5	78	241	61	218	1.91e-08	52.4
tr|P73679|P73679_SYNY3	WP_138072796.1	25.140	179	117	7	64	236	49	216	5.20e-08	50.8
tr|P73679|P73679_SYNY3	WP_138072124.1	23.016	252	172	9	78	327	72	303	1.80e-05	42.7
tr|P73679|P73679_SYNY3	WP_138072043.1	48.148	27	14	0	15	41	172	198	0.47	28.5
sll0100	P54984	N-acyl-L-amino acid amidohydrolase		ama	Random proteins (Glutamate family / Nitrogen assimilation)	Amino acid biosynthesis	Unknown	0.551064534	42.6	0.0
BLAST Output	PCC 11901 Accession	Percentage Identity	Alignment Length	Mismatches	Gap Open	Synechocystis sp. PCC 6803 Start	Synechocystis sp. PCC 6803 End	PCC 11901 Start	PCC 11901 End	E-value	Bit Score
sp|P54984|Y100_SYNY3	WP_138071379.1	70.844	391	113	1	2	392	4	393	0.0	593
sp|P54984|Y100_SYNY3	WP_138071814.1	40.533	375	214	5	8	377	21	391	1.52e-92	280
sp|P54984|Y100_SYNY3	WP_138073926.1	22.222	117	80	3	58	170	121	230	0.34	29.6
sp|P54984|Y100_SYNY3	WP_138073639.1	32.727	55	26	1	310	353	307	361	0.64	28.5
sp|P54984|Y100_SYNY3	WP_138073089.1	30.189	53	25	1	106	146	313	365	0.71	28.1
sp|P54984|Y100_SYNY3	WP_138073611.1	27.778	72	41	2	257	317	87	158	0.76	27.7
slr1653	P74654	N-acyl-L-amino acid amidohydrolase		ama	Random proteins (Glutamate family / Nitrogen assimilation)	Amino acid biosynthesis	Unknown	0.641501469	44.1	0.0
BLAST Output	PCC 11901 Accession	Percentage Identity	Alignment Length	Mismatches	Gap Open	Synechocystis sp. PCC 6803 Start	Synechocystis sp. PCC 6803 End	PCC 11901 Start	PCC 11901 End	E-value	Bit Score
tr|P74654|P74654_SYNY3	WP_138071814.1	61.347	401	155	0	13	413	1	401	0.0	517
tr|P74654|P74654_SYNY3	WP_138071379.1	38.501	387	230	6	33	416	10	391	4.88e-90	275
sll0450	P74677	cytochrome b subunit of nitric oxide reductase	norB	norB, norZ	Random proteins (Glutamate family / Nitrogen assimilation)	Amino acid biosynthesis
BLAST Output	PCC 11901 Accession	Percentage Identity	Alignment Length	Mismatches	Gap Open	Synechocystis sp. PCC 6803 Start	Synechocystis sp. PCC 6803 End	PCC 11901 Start	PCC 11901 End	E-value	Bit Score
tr|P74677|P74677_SYNY3	WP_099237681.1	61.538	26	10	0	265	290	46	71	0.049	31.2
sll0784	Q55949	nitrilase	merR	merR	Random proteins (Glutamate family / Nitrogen assimilation)	Amino acid biosynthesis
BLAST Output	PCC 11901 Accession	Percentage Identity	Alignment Length	Mismatches	Gap Open	Synechocystis sp. PCC 6803 Start	Synechocystis sp. PCC 6803 End	PCC 11901 Start	PCC 11901 End	E-value	Bit Score
tr|Q55949|Q55949_SYNY3	WP_138072669.1	79.456	331	64	1	6	332	1	331	0.0	560
tr|Q55949|Q55949_SYNY3	WP_099238812.1	23.569	297	182	11	11	294	2	266	1.42e-05	42.4
tr|Q55949|Q55949_SYNY3	WP_138073461.1	21.094	128	95	1	13	140	1	122	0.021	33.1
tr|Q55949|Q55949_SYNY3	WP_138073196.1	29.114	79	51	2	89	164	42	118	0.73	28.1
tr|Q55949|Q55949_SYNY3	WP_138072486.1	26.154	65	45	1	63	124	151	215	0.73	27.7
slr1022	P73133	N-acetylornithine aminotransferase	argD	argD, dtu	Biotin	Biosynthesis of cofactors, prosthetic groups, and carriers
BLAST Output	PCC 11901 Accession	Percentage Identity	Alignment Length	Mismatches	Gap Open	Synechocystis sp. PCC 6803 Start	Synechocystis sp. PCC 6803 End	PCC 11901 Start	PCC 11901 End	E-value	Bit Score
sp|P73133|ARGD_SYNY3	WP_138072266.1	76.225	408	96	1	21	428	10	416	0.0	667
sp|P73133|ARGD_SYNY3	WP_065711924.1	30.714	420	245	8	41	425	51	459	2.35e-53	181
sp|P73133|ARGD_SYNY3	WP_030007293.1	27.525	396	224	14	37	396	34	402	8.66e-29	114
sp|P73133|ARGD_SYNY3	WP_138073538.1	29.000	100	54	7	192	283	856	946	0.23	30.4
slr2141	P73677	hypothetical protein			Folate biosynthesis	Biosynthesis of cofactors, prosthetic groups, and carriers	Unknown	0.470597313	37.0	0.0
BLAST Output	PCC 11901 Accession	Percentage Identity	Alignment Length	Mismatches	Gap Open	Synechocystis sp. PCC 6803 Start	Synechocystis sp. PCC 6803 End	PCC 11901 Start	PCC 11901 End	E-value	Bit Score
tr|P73677|P73677_SYNY3	WP_138071993.1	68.041	291	93	0	46	336	3	293	3.40e-146	411
tr|P73677|P73677_SYNY3	WP_138072792.1	25.974	77	55	2	215	291	71	145	0.53	27.7
sll0809	P74052	hypothetical protein		lplA	Lipoate biosynthesis	Biosynthesis of cofactors, prosthetic groups, and carriers
BLAST Output	PCC 11901 Accession	Percentage Identity	Alignment Length	Mismatches	Gap Open	Synechocystis sp. PCC 6803 Start	Synechocystis sp. PCC 6803 End	PCC 11901 Start	PCC 11901 End	E-value	Bit Score
tr|P74052|P74052_SYNY3	WP_099238610.1	51.163	172	84	0	1	172	1	172	5.52e-57	177
tr|P74052|P74052_SYNY3	WP_138072851.1	37.500	40	24	1	70	109	383	421	0.37	28.1
sll0794	Q55938	cobalt-dependent transcriptional regulator	corR, coaR	cbiC, cobH, coaR, corR, merR	Vitamin B12 biosynthesis	Biosynthesis of cofactors, prosthetic groups, and carriers	PM	0.751638799	40.6	0.0
BLAST Output	PCC 11901 Accession	Percentage Identity	Alignment Length	Mismatches	Gap Open	Synechocystis sp. PCC 6803 Start	Synechocystis sp. PCC 6803 End	PCC 11901 Start	PCC 11901 End	E-value	Bit Score
tr|Q55938|Q55938_SYNY3	WP_030005804.1	24.176	182	125	5	177	354	22	194	1.15e-08	51.2
tr|Q55938|Q55938_SYNY3	WP_138072086.1	29.915	117	80	2	1	115	1	117	1.33e-05	41.2
tr|Q55938|Q55938_SYNY3	WP_138071157.1	28.696	115	77	4	24	135	23	135	0.002	35.0
tr|Q55938|Q55938_SYNY3	WP_138072627.1	24.752	101	58	2	90	172	241	341	0.24	29.6
tr|Q55938|Q55938_SYNY3	WP_138073101.1	31.343	67	40	2	71	137	2254	2314	0.56	28.9
tr|Q55938|Q55938_SYNY3	WP_138073186.1	25.610	82	50	3	73	146	352	430	0.68	28.5
tr|Q55938|Q55938_SYNY3	WP_138073542.1	35.484	31	16	1	252	282	77	103	0.85	27.7
slr0191	Q55763	amidase enhancer, periplasmic protein		lytB, spoIID	Peptidoglycan degradation	Cell Envelope	Soluble proteins	0.88279837	59.3	0.0
BLAST Output	PCC 11901 Accession	Percentage Identity	Alignment Length	Mismatches	Gap Open	Synechocystis sp. PCC 6803 Start	Synechocystis sp. PCC 6803 End	PCC 11901 Start	PCC 11901 End	E-value	Bit Score
tr|Q55763|Q55763_SYNY3	WP_138073356.1	57.968	502	206	4	30	529	26	524	0.0	535
tr|Q55763|Q55763_SYNY3	WP_138073501.1	33.770	305	145	9	225	524	117	369	8.15e-37	137
tr|Q55763|Q55763_SYNY3	WP_138072697.1	28.916	83	47	2	68	150	20	90	0.54	29.3
tr|Q55763|Q55763_SYNY3	WP_168191089.1	25.263	95	56	1	241	335	38	117	0.72	28.1
tr|Q55763|Q55763_SYNY3	WP_138072474.1	30.952	84	55	3	268	349	5	87	0.72	28.9
slr0624	Q55867	UDP-N-acetylglucosamine 2-epimerase			Peptidoglycan degradation	Cell Envelope	Soluble proteins	0.866641937	40.6	0.0
BLAST Output	PCC 11901 Accession	Percentage Identity	Alignment Length	Mismatches	Gap Open	Synechocystis sp. PCC 6803 Start	Synechocystis sp. PCC 6803 End	PCC 11901 Start	PCC 11901 End	E-value	Bit Score
tr|Q55867|Q55867_SYNY3	WP_138073122.1	71.429	364	104	0	7	370	3	366	0.0	511
tr|Q55867|Q55867_SYNY3	WP_138072373.1	32.361	377	221	11	3	362	5	364	2.68e-37	135
tr|Q55867|Q55867_SYNY3	WP_138072369.1	30.769	130	80	4	237	362	3	126	1.38e-08	49.7
tr|Q55867|Q55867_SYNY3	WP_138073601.1	31.343	67	36	4	225	286	66	127	0.72	28.5
sll0828	Q55424	putative amidase		nylA	Peptidoglycan degradation	Cell Envelope
BLAST Output	PCC 11901 Accession	Percentage Identity	Alignment Length	Mismatches	Gap Open	Synechocystis sp. PCC 6803 Start	Synechocystis sp. PCC 6803 End	PCC 11901 Start	PCC 11901 End	E-value	Bit Score
sp|Q55424|AMID_SYNY3	WP_138073016.1	30.658	486	274	11	50	490	7	474	6.58e-36	136
slr1708	P73214	probable peptidase			Peptidoglycan degradation	Cell Envelope
BLAST Output	PCC 11901 Accession	Percentage Identity	Alignment Length	Mismatches	Gap Open	Synechocystis sp. PCC 6803 Start	Synechocystis sp. PCC 6803 End	PCC 11901 Start	PCC 11901 End	E-value	Bit Score
tr|P73214|P73214_SYNY3	WP_138071824.1	53.097	113	43	4	258	369	532	635	4.99e-22	94.7
tr|P73214|P73214_SYNY3	WP_030007788.1	37.500	128	59	3	259	368	62	186	2.81e-17	77.0
tr|P73214|P73214_SYNY3	WP_138073359.1	34.677	124	68	6	267	382	176	294	6.51e-08	50.1
tr|P73214|P73214_SYNY3	WP_138072741.1	32.432	37	23	1	105	139	119	155	0.31	28.9
sll1550	P74655	probable porin; major outer membrane protein		sll1550	Random proteins (Membranes, lipoproteins, and porins)	Cell Envelope	Unknown	0.504175303	58.6	0.0
BLAST Output	PCC 11901 Accession	Percentage Identity	Alignment Length	Mismatches	Gap Open	Synechocystis sp. PCC 6803 Start	Synechocystis sp. PCC 6803 End	PCC 11901 Start	PCC 11901 End	E-value	Bit Score
tr|P74655|P74655_SYNY3	WP_138072790.1	40.494	526	249	14	55	544	44	541	2.54e-110	336
tr|P74655|P74655_SYNY3	WP_138073780.1	39.417	515	274	12	45	544	36	527	3.76e-102	314
tr|P74655|P74655_SYNY3	WP_138071875.1	35.739	568	258	19	53	544	49	585	2.83e-89	283
tr|P74655|P74655_SYNY3	WP_138071804.1	52.941	153	70	2	45	196	38	189	4.78e-44	162
tr|P74655|P74655_SYNY3	WP_138071804.1	34.072	361	186	10	204	544	356	684	8.61e-44	162
tr|P74655|P74655_SYNY3	WP_138071648.1	34.426	61	39	1	52	112	34	93	2.38e-05	43.1
tr|P74655|P74655_SYNY3	WP_138071648.1	26.437	87	61	2	31	117	75	158	0.010	34.7
tr|P74655|P74655_SYNY3	WP_138073355.1	31.683	101	59	3	8	108	26	116	0.083	32.0
tr|P74655|P74655_SYNY3	WP_138073883.1	34.247	73	43	4	347	415	1389	1460	0.21	30.8
tr|P74655|P74655_SYNY3	WP_138073052.1	36.585	41	23	1	463	503	626	663	0.51	29.6
tr|P74655|P74655_SYNY3	WP_138073052.1	28.916	83	53	3	99	176	494	575	0.86	28.9
tr|P74655|P74655_SYNY3	WP_138071070.1	31.884	69	43	3	350	415	1637	1704	0.71	29.3
tr|P74655|P74655_SYNY3	WP_138072408.1	46.429	28	15	0	126	153	832	859	0.98	28.5
slr1272	P74184	probable porin; major outer membrane protein		slr1272	Random proteins (Membranes, lipoproteins, and porins)	Cell Envelope	Unknown	0.709832587	28.0	0.0
BLAST Output	PCC 11901 Accession	Percentage Identity	Alignment Length	Mismatches	Gap Open	Synechocystis sp. PCC 6803 Start	Synechocystis sp. PCC 6803 End	PCC 11901 Start	PCC 11901 End	E-value	Bit Score
tr|P74184|P74184_SYNY3	WP_138071804.1	41.875	160	71	5	34	177	17	170	2.07e-26	103
tr|P74184|P74184_SYNY3	WP_138071875.1	41.333	150	71	3	62	198	49	194	2.66e-26	103
tr|P74184|P74184_SYNY3	WP_138073780.1	43.537	147	63	4	46	176	25	167	8.36e-26	102
tr|P74184|P74184_SYNY3	WP_138072790.1	44.882	127	53	3	64	177	44	166	1.52e-24	98.6
tr|P74184|P74184_SYNY3	WP_138071648.1	41.270	63	36	1	65	127	38	99	6.03e-07	46.2
tr|P74184|P74184_SYNY3	WP_138071648.1	27.500	80	56	2	42	121	76	153	0.014	32.7
tr|P74184|P74184_SYNY3	WP_030006297.1	32.530	83	52	2	154	232	62	144	5.34e-04	36.2
tr|P74184|P74184_SYNY3	WP_138073267.1	32.500	80	33	4	71	141	114	181	0.029	31.6
tr|P74184|P74184_SYNY3	WP_138073105.1	29.577	71	48	1	66	136	234	302	0.098	30.0
tr|P74184|P74184_SYNY3	WP_138073355.1	36.538	52	30	2	66	117	68	116	0.47	28.1
tr|P74184|P74184_SYNY3	WP_168191130.1	28.000	125	66	4	105	218	62	173	0.50	27.7
slr1841	P73409	probable porin; major outer membrane protein		slr1841	Random proteins (Membranes, lipoproteins, and porins)	Cell Envelope	Unknown	0.376172732	67.6	0.0
BLAST Output	PCC 11901 Accession	Percentage Identity	Alignment Length	Mismatches	Gap Open	Synechocystis sp. PCC 6803 Start	Synechocystis sp. PCC 6803 End	PCC 11901 Start	PCC 11901 End	E-value	Bit Score
tr|P73409|P73409_SYNY3	WP_138071875.1	41.740	678	242	19	6	630	8	585	1.24e-140	419
tr|P73409|P73409_SYNY3	WP_138072790.1	39.680	625	282	21	11	630	7	541	5.04e-116	353
tr|P73409|P73409_SYNY3	WP_138073780.1	36.783	628	287	18	7	630	6	527	2.18e-103	320
tr|P73409|P73409_SYNY3	WP_138071804.1	40.535	449	162	14	187	630	336	684	1.25e-78	259
tr|P73409|P73409_SYNY3	WP_138071804.1	54.497	189	74	4	6	192	8	186	2.41e-55	196
tr|P73409|P73409_SYNY3	WP_138071648.1	36.842	57	35	1	56	112	38	93	2.15e-04	40.4
tr|P73409|P73409_SYNY3	WP_138071648.1	29.630	54	37	1	64	117	106	158	0.26	30.4
tr|P73409|P73409_SYNY3	WP_138073052.1	32.530	83	50	3	99	176	494	575	0.18	31.2
slr1908	P73103	probable porin; major outer membrane protein		slr1908	Random proteins (Membranes, lipoproteins, and porins)	Cell Envelope	Unknown	0.416987447	64.5	0.0
BLAST Output	PCC 11901 Accession	Percentage Identity	Alignment Length	Mismatches	Gap Open	Synechocystis sp. PCC 6803 Start	Synechocystis sp. PCC 6803 End	PCC 11901 Start	PCC 11901 End	E-value	Bit Score
tr|P73103|P73103_SYNY3	WP_138073780.1	45.627	526	240	9	71	591	43	527	2.11e-150	440
tr|P73103|P73103_SYNY3	WP_138072790.1	39.927	546	254	15	73	591	43	541	6.18e-109	334
tr|P73103|P73103_SYNY3	WP_138071875.1	33.619	583	280	18	71	591	48	585	9.13e-81	262
tr|P73103|P73103_SYNY3	WP_138071804.1	59.574	141	56	1	71	210	45	185	6.19e-49	177
tr|P73103|P73103_SYNY3	WP_138071804.1	33.791	364	197	12	237	591	356	684	1.31e-42	159
tr|P73103|P73103_SYNY3	WP_138071648.1	36.842	57	35	1	75	131	38	93	1.81e-04	40.4
tr|P73103|P73103_SYNY3	WP_138071648.1	29.268	82	53	2	55	136	82	158	0.012	34.7
tr|P73103|P73103_SYNY3	WP_138072317.1	29.670	91	58	4	500	588	6	92	0.62	29.3
sll0772	P15730	probable porin; major outer membrane protein		sll0772	Random proteins (Membranes, lipoproteins, and porins)	Cell Envelope
BLAST Output	PCC 11901 Accession	Percentage Identity	Alignment Length	Mismatches	Gap Open	Synechocystis sp. PCC 6803 Start	Synechocystis sp. PCC 6803 End	PCC 11901 Start	PCC 11901 End	E-value	Bit Score
sp|P15730|Y772_SYNY3	WP_138073780.1	39.209	556	290	12	3	546	8	527	8.54e-117	352
sp|P15730|Y772_SYNY3	WP_138072790.1	36.742	577	298	13	1	546	1	541	2.77e-99	307
sp|P15730|Y772_SYNY3	WP_138071875.1	35.126	595	267	18	27	546	35	585	2.26e-81	262
sp|P15730|Y772_SYNY3	WP_138071804.1	34.530	362	204	7	194	546	347	684	3.37e-47	171
sp|P15730|Y772_SYNY3	WP_138071804.1	48.619	181	77	4	8	187	15	180	5.75e-43	159
sp|P15730|Y772_SYNY3	WP_138071648.1	32.813	64	35	2	50	113	38	93	0.003	36.6
sp|P15730|Y772_SYNY3	WP_138072116.1	44.444	27	15	0	76	102	114	140	0.30	30.0
sp|P15730|Y772_SYNY3	WP_138072043.1	47.368	38	14	2	112	144	32	68	0.47	28.9
sll1187	P72846	prolipoprotein diacylglyceryl transferase		lgt, umpA	Random proteins (Membranes, lipoproteins, and porins)	Cell Envelope
BLAST Output	PCC 11901 Accession	Percentage Identity	Alignment Length	Mismatches	Gap Open	Synechocystis sp. PCC 6803 Start	Synechocystis sp. PCC 6803 End	PCC 11901 Start	PCC 11901 End	E-value	Bit Score
sp|P72846|LGT_SYNY3	WP_062436594.1	66.296	270	91	0	5	274	2	271	6.12e-132	372
sll1271	P73543	probable porin; major outer membrane protein		sll1271	Random proteins (Membranes, lipoproteins, and porins)	Cell Envelope
BLAST Output	PCC 11901 Accession	Percentage Identity	Alignment Length	Mismatches	Gap Open	Synechocystis sp. PCC 6803 Start	Synechocystis sp. PCC 6803 End	PCC 11901 Start	PCC 11901 End	E-value	Bit Score
tr|P73543|P73543_SYNY3	WP_138073780.1	37.891	512	282	15	72	572	41	527	2.15e-97	303
tr|P73543|P73543_SYNY3	WP_138072790.1	36.007	536	279	14	70	572	37	541	1.43e-86	275
tr|P73543|P73543_SYNY3	WP_138071875.1	33.333	576	273	21	72	572	46	585	2.11e-70	234
tr|P73543|P73543_SYNY3	WP_138071804.1	32.578	353	198	12	236	572	356	684	2.27e-40	152
tr|P73543|P73543_SYNY3	WP_138071804.1	50.714	140	61	2	72	210	43	175	4.16e-37	142
tr|P73543|P73543_SYNY3	WP_138071648.1	37.288	59	29	2	83	141	43	93	0.003	36.6
tr|P73543|P73543_SYNY3	WP_138072116.1	44.444	27	15	0	104	130	114	140	0.34	30.0
slr0042	Q59991	probable porin; major outer membrane protein		porB, slr0042	Random proteins (Membranes, lipoproteins, and porins)	Cell Envelope
BLAST Output	PCC 11901 Accession	Percentage Identity	Alignment Length	Mismatches	Gap Open	Synechocystis sp. PCC 6803 Start	Synechocystis sp. PCC 6803 End	PCC 11901 Start	PCC 11901 End	E-value	Bit Score
tr|Q59991|Q59991_SYNY3	WP_138073780.1	40.109	551	263	16	43	576	27	527	2.60e-106	326
tr|Q59991|Q59991_SYNY3	WP_138072790.1	38.333	540	273	16	55	576	44	541	2.31e-93	293
tr|Q59991|Q59991_SYNY3	WP_138071875.1	33.777	601	279	18	42	576	38	585	1.91e-70	234
tr|Q59991|Q59991_SYNY3	WP_138071804.1	55.357	168	67	2	42	201	28	195	1.92e-49	178
tr|Q59991|Q59991_SYNY3	WP_138071804.1	32.323	396	204	11	189	576	345	684	5.19e-38	145
tr|Q59991|Q59991_SYNY3	WP_138071648.1	37.500	64	39	1	49	112	31	93	2.10e-05	43.5
tr|Q59991|Q59991_SYNY3	WP_138071648.1	28.788	66	46	1	52	117	94	158	0.050	32.7
tr|Q59991|Q59991_SYNY3	WP_138073355.1	35.556	90	51	3	45	134	56	138	0.074	32.0
tr|Q59991|Q59991_SYNY3	WP_138072180.1	30.928	97	58	4	174	266	71	162	0.56	29.3
tr|Q59991|Q59991_SYNY3	WP_138073052.1	28.916	83	53	3	99	176	494	575	0.98	28.9
slr0495	Q55185	HetI protein homolog			Random proteins (Membranes, lipoproteins, and porins)	Cell Envelope
BLAST Output	PCC 11901 Accession	Percentage Identity	Alignment Length	Mismatches	Gap Open	Synechocystis sp. PCC 6803 Start	Synechocystis sp. PCC 6803 End	PCC 11901 Start	PCC 11901 End	E-value	Bit Score
sp|Q55185|Y495_SYNY3	WP_138073588.1	36.691	139	80	2	23	158	24	157	7.66e-19	79.0
slr0819	P74055	apolipoprotein N-acyltransferase		int, cutE	Random proteins (Membranes, lipoproteins, and porins)	Cell Envelope
BLAST Output	PCC 11901 Accession	Percentage Identity	Alignment Length	Mismatches	Gap Open	Synechocystis sp. PCC 6803 Start	Synechocystis sp. PCC 6803 End	PCC 11901 Start	PCC 11901 End	E-value	Bit Score
sp|P74055|LNT_SYNY3	WP_138073479.1	42.436	509	278	4	1	497	1	506	5.14e-134	395
sp|P74055|LNT_SYNY3	WP_099238812.1	25.258	194	115	11	276	453	34	213	8.35e-04	37.7
sll0380	Q55745	probable glycosyltransferase		rfbW	Random proteins (Surface polysaccharides, lipopolysaccharides and antigens)	Cell Envelope	PM	0.84235017	41.1	0.0
BLAST Output	PCC 11901 Accession	Percentage Identity	Alignment Length	Mismatches	Gap Open	Synechocystis sp. PCC 6803 Start	Synechocystis sp. PCC 6803 End	PCC 11901 Start	PCC 11901 End	E-value	Bit Score
tr|Q55745|Q55745_SYNY3	WP_138071066.1	51.507	365	174	1	1	365	1	362	3.98e-132	379
tr|Q55745|Q55745_SYNY3	WP_065711271.1	49.861	359	173	3	6	361	2	356	2.82e-125	361
tr|Q55745|Q55745_SYNY3	WP_138073882.1	46.847	222	107	3	1	221	1	212	1.22e-66	207
tr|Q55745|Q55745_SYNY3	WP_138071062.1	29.278	263	168	5	100	351	162	417	6.67e-31	118
tr|Q55745|Q55745_SYNY3	WP_065710775.1	23.849	239	161	5	136	360	151	382	1.21e-09	55.8
tr|Q55745|Q55745_SYNY3	WP_138072361.1	28.481	158	94	6	155	309	189	330	2.76e-09	54.7
tr|Q55745|Q55745_SYNY3	WP_030005953.1	27.966	236	138	11	74	304	99	307	3.89e-09	53.9
tr|Q55745|Q55745_SYNY3	WP_138073806.1	27.660	188	123	6	134	313	152	334	3.63e-08	51.2
tr|Q55745|Q55745_SYNY3	WP_138073301.1	27.179	195	121	6	126	304	109	298	5.38e-08	50.4
tr|Q55745|Q55745_SYNY3	WP_138071472.1	24.336	226	145	7	136	350	144	354	8.15e-08	50.1
tr|Q55745|Q55745_SYNY3	WP_138073291.1	23.899	159	112	4	192	347	214	366	1.28e-07	49.3
tr|Q55745|Q55745_SYNY3	WP_138073253.1	25.862	232	143	13	146	362	158	375	9.05e-07	46.6
tr|Q55745|Q55745_SYNY3	WP_138072899.1	25.123	203	123	7	185	365	254	449	9.54e-07	47.0
tr|Q55745|Q55745_SYNY3	WP_138071414.1	23.121	173	110	5	136	308	160	309	7.33e-04	37.7
tr|Q55745|Q55745_SYNY3	WP_168191169.1	22.424	165	111	4	137	296	193	345	0.001	37.4
tr|Q55745|Q55745_SYNY3	WP_138073302.1	22.222	162	115	3	173	327	208	365	0.005	35.0
tr|Q55745|Q55745_SYNY3	WP_138072100.1	21.084	166	116	4	160	310	164	329	0.012	33.9
tr|Q55745|Q55745_SYNY3	WP_138073290.1	27.885	104	71	3	203	304	205	306	0.015	33.5
tr|Q55745|Q55745_SYNY3	WP_030007336.1	41.463	41	24	0	263	303	192	232	0.015	33.5
tr|Q55745|Q55745_SYNY3	WP_138073535.1	24.342	152	107	4	189	337	229	375	0.086	31.2
tr|Q55745|Q55745_SYNY3	WP_138073245.1	40.000	55	28	2	243	294	317	369	0.088	31.2
sll1457	P73444	probable glycosyltransferase		rfbJ	Random proteins (Surface polysaccharides, lipopolysaccharides and antigens)	Cell Envelope	PM	0.885485971	35.7	2.0
BLAST Output	PCC 11901 Accession	Percentage Identity	Alignment Length	Mismatches	Gap Open	Synechocystis sp. PCC 6803 Start	Synechocystis sp. PCC 6803 End	PCC 11901 Start	PCC 11901 End	E-value	Bit Score
tr|P73444|P73444_SYNY3	WP_138073293.1	22.222	90	66	2	10	95	23	112	0.002	35.8
tr|P73444|P73444_SYNY3	WP_138072519.1	20.492	122	86	4	5	115	102	223	0.063	31.2
tr|P73444|P73444_SYNY3	WP_071925405.1	24.786	117	84	3	15	131	1	113	0.072	30.8
tr|P73444|P73444_SYNY3	WP_138072701.1	28.846	52	37	0	206	257	2	53	0.72	27.3
tr|P73444|P73444_SYNY3	WP_138071414.1	42.308	26	15	0	69	94	18	43	0.93	27.7
slr0344	Q55635	probable glycosyltransferase		rfbW	Random proteins (Surface polysaccharides, lipopolysaccharides and antigens)	Cell Envelope	PM	0.935455399	54.3	0.0
BLAST Output	PCC 11901 Accession	Percentage Identity	Alignment Length	Mismatches	Gap Open	Synechocystis sp. PCC 6803 Start	Synechocystis sp. PCC 6803 End	PCC 11901 Start	PCC 11901 End	E-value	Bit Score
tr|Q55635|Q55635_SYNY3	WP_138071066.1	30.532	357	199	16	15	345	18	351	1.81e-29	115
tr|Q55635|Q55635_SYNY3	WP_065711271.1	29.758	289	174	10	72	345	75	349	2.44e-26	106
tr|Q55635|Q55635_SYNY3	WP_138071062.1	32.171	258	152	10	97	339	165	414	4.43e-26	106
tr|Q55635|Q55635_SYNY3	WP_138071414.1	27.778	216	125	9	114	323	144	334	1.39e-08	53.1
tr|Q55635|Q55635_SYNY3	WP_138071472.1	27.184	103	69	3	263	360	272	373	1.75e-08	52.8
tr|Q55635|Q55635_SYNY3	WP_065710775.1	42.857	49	28	0	248	296	275	323	5.39e-06	45.1
tr|Q55635|Q55635_SYNY3	WP_138073301.1	26.619	139	89	7	217	346	215	349	7.57e-06	44.3
tr|Q55635|Q55635_SYNY3	WP_030007336.1	35.616	73	39	1	229	293	158	230	3.29e-05	42.4
tr|Q55635|Q55635_SYNY3	WP_138073806.1	27.619	105	73	3	248	349	275	379	3.41e-05	42.4
tr|Q55635|Q55635_SYNY3	WP_138072361.1	31.933	119	76	3	184	301	216	330	1.23e-04	40.4
tr|Q55635|Q55635_SYNY3	WP_138073291.1	29.245	106	68	3	261	361	286	389	0.002	37.0
tr|Q55635|Q55635_SYNY3	WP_030005953.1	31.765	85	55	2	255	338	266	348	0.002	36.6
tr|Q55635|Q55635_SYNY3	WP_138073302.1	23.273	275	171	13	71	322	111	368	0.005	35.4
tr|Q55635|Q55635_SYNY3	WP_138072899.1	34.211	38	25	0	262	299	351	388	0.072	32.0
tr|Q55635|Q55635_SYNY3	WP_168191169.1	35.897	39	25	0	251	289	308	346	0.11	31.2
tr|Q55635|Q55635_SYNY3	WP_138073505.1	21.552	116	85	1	327	436	34	149	0.17	30.8
tr|Q55635|Q55635_SYNY3	WP_138073290.1	43.590	39	21	1	261	298	270	308	0.19	30.4
tr|Q55635|Q55635_SYNY3	WP_138073252.1	24.638	69	47	3	272	335	320	388	0.42	29.3
tr|Q55635|Q55635_SYNY3	WP_138072100.1	30.909	55	34	1	258	308	285	339	0.68	28.9
slr1064	P72900	probable glycosyltransferase		rfbU, mtfA	Random proteins (Surface polysaccharides, lipopolysaccharides and antigens)	Cell Envelope	PM	0.859394487	41.8	0.0
BLAST Output	PCC 11901 Accession	Percentage Identity	Alignment Length	Mismatches	Gap Open	Synechocystis sp. PCC 6803 Start	Synechocystis sp. PCC 6803 End	PCC 11901 Start	PCC 11901 End	E-value	Bit Score
tr|P72900|P72900_SYNY3	WP_138071066.1	35.632	261	162	3	111	367	104	362	1.13e-42	149
tr|P72900|P72900_SYNY3	WP_065711271.1	30.068	296	198	3	80	366	64	359	3.64e-35	129
tr|P72900|P72900_SYNY3	WP_138071062.1	28.205	273	173	7	111	367	166	431	2.57e-26	105
tr|P72900|P72900_SYNY3	WP_065710775.1	28.571	175	121	3	196	367	214	387	9.13e-13	65.5
tr|P72900|P72900_SYNY3	WP_138071472.1	29.121	182	117	5	189	367	197	369	1.39e-12	64.7
tr|P72900|P72900_SYNY3	WP_138073806.1	26.033	242	168	9	135	367	147	386	2.36e-09	54.7
tr|P72900|P72900_SYNY3	WP_030005953.1	29.213	178	115	7	194	366	199	370	3.41e-08	51.2
tr|P72900|P72900_SYNY3	WP_168191169.1	27.189	217	139	7	134	342	184	389	5.76e-08	50.4
tr|P72900|P72900_SYNY3	WP_138073252.1	23.600	250	172	8	120	358	160	401	3.76e-07	48.1
tr|P72900|P72900_SYNY3	WP_138073302.1	22.667	150	112	3	221	366	254	403	2.53e-06	45.4
tr|P72900|P72900_SYNY3	WP_138071414.1	33.663	101	59	4	226	324	231	325	5.16e-06	44.3
tr|P72900|P72900_SYNY3	WP_138072361.1	24.848	165	114	5	172	333	197	354	1.23e-05	43.1
tr|P72900|P72900_SYNY3	WP_030007336.1	35.955	89	33	3	262	333	181	262	2.36e-05	42.0
tr|P72900|P72900_SYNY3	WP_138073291.1	25.362	138	94	5	190	322	206	339	2.96e-04	38.9
tr|P72900|P72900_SYNY3	WP_138072899.1	22.321	112	83	3	260	367	338	449	6.00e-04	38.1
tr|P72900|P72900_SYNY3	WP_138073295.1	29.114	79	51	2	288	364	286	361	0.002	36.6
tr|P72900|P72900_SYNY3	WP_138073882.1	28.000	100	69	2	111	209	104	201	0.004	34.7
tr|P72900|P72900_SYNY3	WP_138071494.1	45.833	24	13	0	104	127	228	251	0.050	31.6
tr|P72900|P72900_SYNY3	WP_138072100.1	20.879	91	71	1	220	309	236	326	0.064	31.6
slr1271	P74183	probable UDP-N-acetyl-D-mannosaminuronic acid transferase		rffM, gumM	Random proteins (Surface polysaccharides, lipopolysaccharides and antigens)	Cell Envelope	PM	0.902065731	28.1	0.0
BLAST Output	PCC 11901 Accession	Percentage Identity	Alignment Length	Mismatches	Gap Open	Synechocystis sp. PCC 6803 Start	Synechocystis sp. PCC 6803 End	PCC 11901 Start	PCC 11901 End	E-value	Bit Score
tr|P74183|P74183_SYNY3	WP_138073077.1	53.333	240	110	1	6	245	4	241	7.48e-89	259
tr|P74183|P74183_SYNY3	WP_168191163.1	29.487	234	152	7	9	233	3	232	1.30e-20	84.3
tr|P74183|P74183_SYNY3	WP_138073052.1	30.159	63	43	1	7	69	520	581	0.69	27.7
sll0083	Q55797	phosphoheptose isomerase		gmhA	Random proteins (Surface polysaccharides, lipopolysaccharides and antigens)	Cell Envelope	Soluble proteins	0.925432917	21.1	0.0
BLAST Output	PCC 11901 Accession	Percentage Identity	Alignment Length	Mismatches	Gap Open	Synechocystis sp. PCC 6803 Start	Synechocystis sp. PCC 6803 End	PCC 11901 Start	PCC 11901 End	E-value	Bit Score
sp|Q55797|GMHA_SYNY3	WP_030006142.1	35.417	48	26	2	144	191	55	97	0.34	27.7
sp|Q55797|GMHA_SYNY3	WP_012307271.1	33.333	27	18	0	154	180	95	121	0.45	27.7
slr0583	Q55412	similar to GDP-fucose synthetase			Random proteins (Surface polysaccharides, lipopolysaccharides and antigens)	Cell Envelope	Soluble proteins	0.901277754	35.2	0.0
BLAST Output	PCC 11901 Accession	Percentage Identity	Alignment Length	Mismatches	Gap Open	Synechocystis sp. PCC 6803 Start	Synechocystis sp. PCC 6803 End	PCC 11901 Start	PCC 11901 End	E-value	Bit Score
tr|Q55412|Q55412_SYNY3	WP_138071899.1	30.844	308	203	7	2	302	8	312	3.38e-37	131
tr|Q55412|Q55412_SYNY3	WP_138071301.1	25.705	319	199	10	1	297	1	303	2.65e-18	80.1
tr|Q55412|Q55412_SYNY3	WP_138073475.1	22.054	331	205	13	2	299	3	313	6.48e-09	52.8
tr|Q55412|Q55412_SYNY3	WP_138073434.1	22.082	317	169	14	1	287	1	269	1.14e-04	39.7
tr|Q55412|Q55412_SYNY3	WP_138073408.1	21.771	271	173	13	3	241	6	269	0.017	32.7
tr|Q55412|Q55412_SYNY3	WP_138072043.1	28.814	59	28	1	4	48	5	63	0.22	29.3
tr|Q55412|Q55412_SYNY3	WP_065710302.1	38.462	39	21	1	1	36	1	39	0.45	28.5
tr|Q55412|Q55412_SYNY3	WP_138073630.1	40.541	37	17	1	137	173	523	554	0.64	28.1
slr2116	P73983	probable glycosyltransferase		spsA	Random proteins (Surface polysaccharides, lipopolysaccharides and antigens)	Cell Envelope	Unknown	0.403217512	32.7	0.0
BLAST Output	PCC 11901 Accession	Percentage Identity	Alignment Length	Mismatches	Gap Open	Synechocystis sp. PCC 6803 Start	Synechocystis sp. PCC 6803 End	PCC 11901 Start	PCC 11901 End	E-value	Bit Score
tr|P73983|P73983_SYNY3	WP_138073293.1	42.553	94	54	0	11	104	24	117	5.26e-18	79.0
tr|P73983|P73983_SYNY3	WP_138073297.1	42.553	94	53	1	11	104	5	97	5.51e-17	75.9
tr|P73983|P73983_SYNY3	WP_030006148.1	36.170	94	52	2	11	96	4	97	1.30e-12	63.2
tr|P73983|P73983_SYNY3	WP_065711106.1	29.221	154	95	6	11	157	17	163	5.77e-12	61.6
tr|P73983|P73983_SYNY3	WP_012308045.1	30.841	107	69	3	12	115	4	108	1.19e-06	45.4
tr|P73983|P73983_SYNY3	WP_138072774.1	28.696	115	75	4	12	119	5	119	3.37e-06	43.9
tr|P73983|P73983_SYNY3	WP_138072519.1	25.472	106	72	3	10	108	107	212	2.55e-05	41.6
tr|P73983|P73983_SYNY3	WP_138073559.1	28.421	95	59	4	11	96	53	147	4.88e-05	40.8
tr|P73983|P73983_SYNY3	WP_071925405.1	32.308	65	40	1	32	96	17	77	5.62e-05	40.0
tr|P73983|P73983_SYNY3	WP_030008213.1	25.000	88	63	1	12	96	4	91	0.024	32.3
sll1535	P74347	putative sugar transferase		rfbP, gumD, sll1535	Random proteins (Surface polysaccharides, lipopolysaccharides and antigens)	Cell Envelope
BLAST Output	PCC 11901 Accession	Percentage Identity	Alignment Length	Mismatches	Gap Open	Synechocystis sp. PCC 6803 Start	Synechocystis sp. PCC 6803 End	PCC 11901 Start	PCC 11901 End	E-value	Bit Score
tr|P74347|P74347_SYNY3	WP_138071412.1	70.874	206	60	0	38	243	39	244	6.70e-109	310
tr|P74347|P74347_SYNY3	WP_181445687.1	42.786	201	109	3	44	243	241	436	2.44e-41	143
tr|P74347|P74347_SYNY3	WP_012306993.1	26.923	52	37	1	122	173	68	118	0.56	26.9
sll1724	P73401	probable glycosyltransferase		icsA	Random proteins (Surface polysaccharides, lipopolysaccharides and antigens)	Cell Envelope
BLAST Output	PCC 11901 Accession	Percentage Identity	Alignment Length	Mismatches	Gap Open	Synechocystis sp. PCC 6803 Start	Synechocystis sp. PCC 6803 End	PCC 11901 Start	PCC 11901 End	E-value	Bit Score
tr|P73401|P73401_SYNY3	WP_138073253.1	84.433	379	59	0	1	379	1	379	0.0	656
tr|P73401|P73401_SYNY3	WP_138073302.1	27.451	255	168	6	128	376	156	399	1.10e-19	86.3
tr|P73401|P73401_SYNY3	WP_138073252.1	31.140	228	147	4	153	373	178	402	6.62e-16	75.1
tr|P73401|P73401_SYNY3	WP_138072361.1	28.125	192	122	6	167	357	187	363	7.60e-14	68.9
tr|P73401|P73401_SYNY3	WP_138071414.1	30.625	160	92	6	183	342	190	330	4.90e-11	60.1
tr|P73401|P73401_SYNY3	WP_138073806.1	24.251	334	230	9	55	377	60	381	9.73e-11	59.3
tr|P73401|P73401_SYNY3	WP_138073291.1	21.708	281	201	7	80	353	89	357	1.73e-10	58.5
tr|P73401|P73401_SYNY3	WP_138071472.1	28.182	220	132	9	146	357	145	346	4.84e-09	53.9
tr|P73401|P73401_SYNY3	WP_138073301.1	27.333	150	103	4	198	346	183	327	6.37e-08	50.4
tr|P73401|P73401_SYNY3	WP_138073283.1	24.291	247	162	7	149	378	192	430	9.79e-08	50.1
tr|P73401|P73401_SYNY3	WP_138073535.1	24.893	233	152	7	135	352	151	375	2.71e-07	48.5
tr|P73401|P73401_SYNY3	WP_030005953.1	26.570	207	140	6	171	373	165	363	2.07e-06	45.8
tr|P73401|P73401_SYNY3	WP_138073290.1	21.795	234	167	7	138	365	130	353	2.01e-05	42.7
tr|P73401|P73401_SYNY3	WP_065710775.1	22.266	256	166	9	132	370	137	376	2.59e-05	42.4
tr|P73401|P73401_SYNY3	WP_138071062.1	26.623	154	98	6	204	352	260	403	5.58e-05	41.2
tr|P73401|P73401_SYNY3	WP_138072899.1	26.667	135	93	3	248	379	316	447	7.57e-05	41.2
tr|P73401|P73401_SYNY3	WP_138073295.1	21.528	288	165	12	50	318	60	305	0.016	33.5
tr|P73401|P73401_SYNY3	WP_030007384.1	34.211	38	25	0	162	199	33	70	0.34	28.5
slr1118	P72632	probable UDP-N-acetyl-D-mannosaminuronic acid transferase		rffM, gumM	Random proteins (Surface polysaccharides, lipopolysaccharides and antigens)	Cell Envelope
BLAST Output	PCC 11901 Accession	Percentage Identity	Alignment Length	Mismatches	Gap Open	Synechocystis sp. PCC 6803 Start	Synechocystis sp. PCC 6803 End	PCC 11901 Start	PCC 11901 End	E-value	Bit Score
tr|P72632|P72632_SYNY3	WP_168191163.1	54.878	246	111	0	4	249	6	251	4.29e-101	291
tr|P72632|P72632_SYNY3	WP_138073077.1	33.649	211	132	5	33	242	37	240	1.18e-26	100
slr2114	P73981	perosamine synthetase		spsC	Random proteins (Surface polysaccharides, lipopolysaccharides and antigens)	Cell Envelope
BLAST Output	PCC 11901 Accession	Percentage Identity	Alignment Length	Mismatches	Gap Open	Synechocystis sp. PCC 6803 Start	Synechocystis sp. PCC 6803 End	PCC 11901 Start	PCC 11901 End	E-value	Bit Score
tr|P73981|P73981_SYNY3	WP_138073532.1	40.181	331	186	6	21	345	46	370	6.50e-77	237
tr|P73981|P73981_SYNY3	WP_138072499.1	30.909	110	68	3	31	133	94	202	9.85e-07	46.6
tr|P73981|P73981_SYNY3	WP_138073095.1	25.926	135	87	6	19	143	68	199	1.42e-05	43.1
tr|P73981|P73981_SYNY3	WP_138073383.1	39.024	41	22	1	215	252	75	115	0.38	28.1
tr|P73981|P73981_SYNY3	WP_138072633.1	32.895	76	41	2	180	248	274	346	0.39	28.9
sll1568	P73219	fibrillin		pgl1	Random proteins (Surface structures)	Cell Envelope	PM	0.870203647	22.7	0.0
BLAST Output	PCC 11901 Accession	Percentage Identity	Alignment Length	Mismatches	Gap Open	Synechocystis sp. PCC 6803 Start	Synechocystis sp. PCC 6803 End	PCC 11901 Start	PCC 11901 End	E-value	Bit Score
tr|P73219|P73219_SYNY3	WP_012307392.1	56.477	193	84	0	9	201	1	193	2.59e-82	239
slr1024	P73135	fibrillin		pgl2	Random proteins (Surface structures)	Cell Envelope	Unknown	0.360500095	23.6	0.0
BLAST Output	PCC 11901 Accession	Percentage Identity	Alignment Length	Mismatches	Gap Open	Synechocystis sp. PCC 6803 Start	Synechocystis sp. PCC 6803 End	PCC 11901 Start	PCC 11901 End	E-value	Bit Score
tr|P73135|P73135_SYNY3	WP_012307392.1	36.508	189	99	7	30	207	15	193	3.25e-23	89.4
tr|P73135|P73135_SYNY3	WP_138071030.1	24.242	66	46	1	1	62	129	194	0.86	26.9
slr0983	P72885	glucose-1-phosphate cytidylyltransferase	rfbF	rfbF, slr0983	Rhamnose or EPSLPS biosynthesis	Cell Envelope	Soluble proteins	0.899776428	28.8	0.0
BLAST Output	PCC 11901 Accession	Percentage Identity	Alignment Length	Mismatches	Gap Open	Synechocystis sp. PCC 6803 Start	Synechocystis sp. PCC 6803 End	PCC 11901 Start	PCC 11901 End	E-value	Bit Score
tr|P72885|P72885_SYNY3	WP_030006585.1	27.830	212	126	8	1	200	1	197	1.74e-17	77.8
tr|P72885|P72885_SYNY3	WP_012306577.1	27.184	206	122	6	1	200	1	184	3.00e-16	74.7
tr|P72885|P72885_SYNY3	WP_062431685.1	22.043	186	113	9	12	182	15	183	0.012	33.1
slr0984	P72886	CDP-glucose 4,6-dehydratase	rfbG	rfbG, slr0984	Rhamnose or EPSLPS biosynthesis	Cell Envelope	Soluble proteins	0.909373805	40.0	0.0
BLAST Output	PCC 11901 Accession	Percentage Identity	Alignment Length	Mismatches	Gap Open	Synechocystis sp. PCC 6803 Start	Synechocystis sp. PCC 6803 End	PCC 11901 Start	PCC 11901 End	E-value	Bit Score
tr|P72886|P72886_SYNY3	WP_138073475.1	27.219	338	199	14	12	330	4	313	1.55e-11	61.2
tr|P72886|P72886_SYNY3	WP_138073408.1	24.854	342	225	11	10	334	4	330	5.76e-10	56.2
tr|P72886|P72886_SYNY3	WP_138071577.1	30.252	119	74	2	9	120	3	119	1.09e-06	46.2
tr|P72886|P72886_SYNY3	WP_138071301.1	23.724	333	212	16	12	331	3	306	1.89e-06	45.4
tr|P72886|P72886_SYNY3	WP_138071899.1	21.557	334	214	12	10	328	7	307	3.10e-06	44.7
tr|P72886|P72886_SYNY3	WP_138073170.1	31.522	92	46	5	10	99	3	79	0.53	28.5
slr1615	P72893	perosamine synthetase	rfbE	rfbE	Rhamnose or EPSLPS biosynthesis	Cell Envelope	Soluble proteins	0.866642183	41.9	0.0
BLAST Output	PCC 11901 Accession	Percentage Identity	Alignment Length	Mismatches	Gap Open	Synechocystis sp. PCC 6803 Start	Synechocystis sp. PCC 6803 End	PCC 11901 Start	PCC 11901 End	E-value	Bit Score
tr|P72893|P72893_SYNY3	WP_138073532.1	31.928	332	209	8	37	360	39	361	4.35e-44	153
tr|P72893|P72893_SYNY3	WP_138073095.1	32.692	104	61	4	72	166	98	201	2.57e-06	45.4
tr|P72893|P72893_SYNY3	WP_138072499.1	30.000	130	79	4	8	128	42	168	3.64e-05	42.0
tr|P72893|P72893_SYNY3	WP_138071295.1	22.436	156	104	6	56	199	82	232	5.83e-04	38.1
tr|P72893|P72893_SYNY3	WP_138073193.1	24.268	239	164	9	52	277	57	291	0.041	32.3
tr|P72893|P72893_SYNY3	WP_065716658.1	22.680	97	67	3	72	161	115	210	0.20	30.0
sll1181	P74175	similar to hemolysin secretion protein		hlyD	Random proteins (Cell killing)	Cellular Processes	PM	0.935126313	64.7	0.0
BLAST Output	PCC 11901 Accession	Percentage Identity	Alignment Length	Mismatches	Gap Open	Synechocystis sp. PCC 6803 Start	Synechocystis sp. PCC 6803 End	PCC 11901 Start	PCC 11901 End	E-value	Bit Score
tr|P74175|P74175_SYNY3	WP_138071087.1	44.879	537	278	4	54	580	1	529	1.08e-150	441
tr|P74175|P74175_SYNY3	WP_138073763.1	26.786	168	105	4	342	502	163	319	1.33e-04	40.8
tr|P74175|P74175_SYNY3	WP_138073412.1	31.818	66	43	1	431	496	284	347	0.008	35.4
tr|P74175|P74175_SYNY3	WP_138073412.1	30.508	59	39	1	88	146	43	99	0.036	33.1
tr|P74175|P74175_SYNY3	WP_012308147.1	29.114	79	55	1	90	168	61	138	0.37	30.0
tr|P74175|P74175_SYNY3	WP_138073384.1	37.500	48	29	1	337	383	172	219	0.77	28.9
tr|P74175|P74175_SYNY3	WP_138071313.1	29.787	47	33	0	217	263	330	376	0.88	28.9
tr|P74175|P74175_SYNY3	WP_030006557.1	36.957	46	22	1	2	47	86	124	1.00	28.5
slr1747	P73738	cell death suppressor protein Lls1 homolog			Random proteins (Cell killing)	Cellular Processes	TM	0.841009644	52.5	2.0
BLAST Output	PCC 11901 Accession	Percentage Identity	Alignment Length	Mismatches	Gap Open	Synechocystis sp. PCC 6803 Start	Synechocystis sp. PCC 6803 End	PCC 11901 Start	PCC 11901 End	E-value	Bit Score
tr|P73738|P73738_SYNY3	WP_138071650.1	50.909	440	206	6	28	464	17	449	4.62e-153	439
tr|P73738|P73738_SYNY3	WP_138073672.1	31.551	187	112	7	16	194	8	186	1.48e-17	80.5
slr0950	P74319	hemolysin-like protein			Random proteins (Cell killing)	Cellular Processes	Unknown	0.639823552	30.0	0.0
BLAST Output	PCC 11901 Accession	Percentage Identity	Alignment Length	Mismatches	Gap Open	Synechocystis sp. PCC 6803 Start	Synechocystis sp. PCC 6803 End	PCC 11901 Start	PCC 11901 End	E-value	Bit Score
tr|P74319|P74319_SYNY3	WP_138072450.1	72.314	242	66	1	6	246	3	244	5.32e-125	354
sll0720	P74650	RTX toxin activating protein homolog			Random proteins (Cell killing)	Cellular Processes
BLAST Output	PCC 11901 Accession	Percentage Identity	Alignment Length	Mismatches	Gap Open	Synechocystis sp. PCC 6803 Start	Synechocystis sp. PCC 6803 End	PCC 11901 Start	PCC 11901 End	E-value	Bit Score
sp|P74650|Y720_SYNY3	WP_138071212.1	28.571	84	46	4	45	114	94	177	0.32	27.3
sp|P74650|Y720_SYNY3	WP_138073432.1	23.704	135	82	5	10	139	493	611	0.39	27.3
sll1615	P73839	thiophen and furan oxidation protein		thdF, trmE	Random proteins (Detoxification)	Cellular Processes	Soluble proteins	0.924558674	50.0	0.0
BLAST Output	PCC 11901 Accession	Percentage Identity	Alignment Length	Mismatches	Gap Open	Synechocystis sp. PCC 6803 Start	Synechocystis sp. PCC 6803 End	PCC 11901 Start	PCC 11901 End	E-value	Bit Score
sp|P73839|MNME_SYNY3	WP_138073099.1	70.217	460	133	1	1	456	1	460	0.0	634
sp|P73839|MNME_SYNY3	WP_012305762.1	41.935	124	67	2	220	338	175	298	4.03e-19	85.9
sp|P73839|MNME_SYNY3	WP_012305762.1	33.051	118	76	2	224	338	6	123	2.66e-09	55.5
sp|P73839|MNME_SYNY3	WP_030007130.1	33.333	123	79	2	218	338	18	139	4.78e-11	60.1
sp|P73839|MNME_SYNY3	WP_138071986.1	31.707	123	73	3	222	339	62	178	1.11e-06	47.0
sp|P73839|MNME_SYNY3	WP_138073575.1	26.633	199	98	8	173	338	16	199	1.07e-05	43.9
sp|P73839|MNME_SYNY3	WP_030006721.1	30.508	177	101	7	180	339	80	251	7.05e-05	41.6
sp|P73839|MNME_SYNY3	WP_138073360.1	30.000	70	45	2	212	281	12	77	3.06e-04	39.7
sp|P73839|MNME_SYNY3	WP_062434581.1	30.337	89	39	2	222	290	2	87	6.62e-04	38.1
sp|P73839|MNME_SYNY3	WP_181445693.1	24.706	170	107	6	225	378	397	561	0.013	34.3
sp|P73839|MNME_SYNY3	WP_138073307.1	26.816	179	112	7	223	385	161	336	0.040	32.3
sp|P73839|MNME_SYNY3	WP_030007630.1	36.364	77	33	3	111	175	27	99	0.40	28.1
sp|P73839|MNME_SYNY3	WP_138072760.1	24.359	156	103	6	189	338	438	584	0.79	28.5
sll1987	P73911	catalase peroxidase	cpx, katG	cpx, katG	Random proteins (Detoxification)	Cellular Processes	Soluble proteins	0.908198538	81.4	0.0
BLAST Output	PCC 11901 Accession	Percentage Identity	Alignment Length	Mismatches	Gap Open	Synechocystis sp. PCC 6803 Start	Synechocystis sp. PCC 6803 End	PCC 11901 Start	PCC 11901 End	E-value	Bit Score
sp|P73911|KATG_SYNY3	WP_138073713.1	76.072	723	158	6	35	751	7	720	0.0	1140
sp|P73911|KATG_SYNY3	WP_062433174.1	33.333	57	34	2	521	576	336	389	0.81	29.3
slr1516	P77968	superoxide dismutase	sodB	sodB	Random proteins (Detoxification)	Cellular Processes	Soluble proteins	0.882978329	21.7	0.0
BLAST Output	PCC 11901 Accession	Percentage Identity	Alignment Length	Mismatches	Gap Open	Synechocystis sp. PCC 6803 Start	Synechocystis sp. PCC 6803 End	PCC 11901 Start	PCC 11901 End	E-value	Bit Score
sp|P77968|SODF_SYNY3	WP_030006045.1	86.935	199	26	0	1	199	1	199	5.46e-131	363
sll1980	P73920	thiol:disulfide interchange protein TrxA	trxA	txlA, trxA, trxA3	Random proteins (Detoxification)	Cellular Processes	TM	0.933626447	19.5	1.0
BLAST Output	PCC 11901 Accession	Percentage Identity	Alignment Length	Mismatches	Gap Open	Synechocystis sp. PCC 6803 Start	Synechocystis sp. PCC 6803 End	PCC 11901 Start	PCC 11901 End	E-value	Bit Score
sp|P73920|TXLA_SYNY3	WP_138073144.1	57.895	171	72	0	5	175	10	180	3.71e-74	218
sp|P73920|TXLA_SYNY3	WP_012306818.1	34.146	82	50	3	47	128	13	90	3.31e-09	49.3
sp|P73920|TXLA_SYNY3	WP_012307227.1	27.907	86	59	2	49	134	17	99	1.62e-07	44.3
sp|P73920|TXLA_SYNY3	WP_012305927.1	30.882	68	43	2	49	115	18	82	3.81e-06	40.8
sp|P73920|TXLA_SYNY3	WP_012307964.1	33.333	45	28	1	53	97	19	61	1.29e-05	39.3
sp|P73920|TXLA_SYNY3	WP_168191159.1	23.958	96	62	2	54	141	69	161	4.53e-04	35.8
sll0755	Q55624	thioredoxin peroxidase	tpx, ycf42	tpx, 2-CP, 2-cys prx, ycf42	Random proteins (Detoxification)	Cellular Processes	Unknown	0.507881673	22.5	0.0
BLAST Output	PCC 11901 Accession	Percentage Identity	Alignment Length	Mismatches	Gap Open	Synechocystis sp. PCC 6803 Start	Synechocystis sp. PCC 6803 End	PCC 11901 Start	PCC 11901 End	E-value	Bit Score
sp|Q55624|Y755_SYNY3	WP_030005827.1	72.917	192	52	0	6	197	4	195	4.16e-111	312
sp|Q55624|Y755_SYNY3	WP_065715821.1	31.148	183	117	5	5	184	3	179	2.22e-27	100
sp|Q55624|Y755_SYNY3	WP_138072953.1	34.375	160	87	5	5	156	4	153	2.11e-18	75.1
sp|Q55624|Y755_SYNY3	WP_030006741.1	31.928	166	101	4	6	168	34	190	1.20e-16	71.2
sp|Q55624|Y755_SYNY3	WP_030006221.1	43.478	23	10	1	169	188	94	116	0.54	26.9
slr6037	Q6YRW7	arsenate reductase		arsI2	Random proteins (Detoxification)	Cellular Processes	Unknown	0.537180599	15.5	0.0
BLAST Output	PCC 11901 Accession	Percentage Identity	Alignment Length	Mismatches	Gap Open	Synechocystis sp. PCC 6803 Start	Synechocystis sp. PCC 6803 End	PCC 11901 Start	PCC 11901 End	E-value	Bit Score
sp|Q6YRW7|ARSI2_SYNY3	WP_099240001.1	38.095	42	18	2	17	55	42	78	0.91	24.6
sll5104	Q6ZEM6	arsenate reductase		arsI1	Random proteins (Detoxification)	Cellular Processes
BLAST Output	PCC 11901 Accession	Percentage Identity	Alignment Length	Mismatches	Gap Open	Synechocystis sp. PCC 6803 Start	Synechocystis sp. PCC 6803 End	PCC 11901 Start	PCC 11901 End	E-value	Bit Score
sp|Q6ZEM6|ARSI1_SYNY3	WP_099240001.1	38.095	42	18	2	21	59	42	78	0.88	24.6
sll0533	Q55511	trigger factor		tig	Random proteins (Protein and peptide secretion)	Cellular Processes	Unknown	0.662326816	52.6	0.0
BLAST Output	PCC 11901 Accession	Percentage Identity	Alignment Length	Mismatches	Gap Open	Synechocystis sp. PCC 6803 Start	Synechocystis sp. PCC 6803 End	PCC 11901 Start	PCC 11901 End	E-value	Bit Score
sp|Q55511|TIG_SYNY3	WP_138073162.1	44.519	447	240	5	1	444	1	442	2.96e-121	358
slr1366	P73540	lipoprotein signal peptidase (signal peptidase II)		lspA	Random proteins (Protein and peptide secretion)	Cellular Processes
BLAST Output	PCC 11901 Accession	Percentage Identity	Alignment Length	Mismatches	Gap Open	Synechocystis sp. PCC 6803 Start	Synechocystis sp. PCC 6803 End	PCC 11901 Start	PCC 11901 End	E-value	Bit Score
sp|P73540|LSPA_SYNY3	WP_138072248.1	63.889	144	51	1	6	148	6	149	6.30e-57	172
sll1929	P73100	competence protein ComE	comE	comEC	Random proteins (Transformation)	Cellular Processes	PM	0.844109535	77.8	12.0
BLAST Output	PCC 11901 Accession	Percentage Identity	Alignment Length	Mismatches	Gap Open	Synechocystis sp. PCC 6803 Start	Synechocystis sp. PCC 6803 End	PCC 11901 Start	PCC 11901 End	E-value	Bit Score
tr|P73100|P73100_SYNY3	WP_138072837.1	31.544	745	450	12	1	705	1	725	2.07e-83	276
slr0197	Q55769	competence protein	comA	comA, comEA	Random proteins (Transformation)	Cellular Processes	Unknown	0.714078063	61.2	1.0
BLAST Output	PCC 11901 Accession	Percentage Identity	Alignment Length	Mismatches	Gap Open	Synechocystis sp. PCC 6803 Start	Synechocystis sp. PCC 6803 End	PCC 11901 Start	PCC 11901 End	E-value	Bit Score
tr|Q55769|Q55769_SYNY3	WP_138073503.1	48.162	544	243	7	16	553	10	520	3.74e-166	479
slr0904	Q55372	competence protein ComM homolog	comM	comM	Random proteins (Transformation)	Cellular Processes	Unknown	0.557686027	55.1	0.0
BLAST Output	PCC 11901 Accession	Percentage Identity	Alignment Length	Mismatches	Gap Open	Synechocystis sp. PCC 6803 Start	Synechocystis sp. PCC 6803 End	PCC 11901 Start	PCC 11901 End	E-value	Bit Score
tr|Q55372|Q55372_SYNY3	WP_138072317.1	73.529	510	131	2	1	508	1	508	0.0	773
tr|Q55372|Q55372_SYNY3	WP_138072402.1	25.616	203	103	8	216	400	621	793	1.64e-05	43.9
tr|Q55372|Q55372_SYNY3	WP_012307853.1	35.000	60	39	0	292	351	142	201	3.86e-05	42.4
tr|Q55372|Q55372_SYNY3	WP_138071325.1	24.378	201	112	8	216	402	606	780	2.35e-04	40.0
tr|Q55372|Q55372_SYNY3	WP_138072588.1	34.426	61	40	0	291	351	135	195	2.64e-04	40.0
tr|Q55372|Q55372_SYNY3	WP_138072301.1	30.380	79	22	1	158	236	183	228	0.003	36.6
tr|Q55372|Q55372_SYNY3	WP_030006985.1	33.333	54	33	1	190	240	8	61	0.004	35.8
tr|Q55372|Q55372_SYNY3	WP_138073103.1	26.582	79	25	2	158	236	193	238	0.019	33.9
tr|Q55372|Q55372_SYNY3	WP_062431746.1	24.306	144	75	6	216	349	540	659	0.047	32.7
tr|Q55372|Q55372_SYNY3	WP_012305681.1	26.923	78	24	1	159	236	172	216	0.048	32.7
tr|Q55372|Q55372_SYNY3	WP_012307148.1	25.000	100	53	3	216	314	133	211	0.061	32.3
tr|Q55372|Q55372_SYNY3	WP_065710337.1	23.077	78	27	1	159	236	181	225	0.093	31.6
tr|Q55372|Q55372_SYNY3	WP_138073562.1	48.387	31	16	0	207	237	22	52	0.094	31.6
tr|Q55372|Q55372_SYNY3	WP_138073220.1	30.667	75	38	3	288	350	110	182	0.12	31.2
tr|Q55372|Q55372_SYNY3	WP_030007864.1	25.676	74	52	1	186	256	3	76	0.18	30.4
tr|Q55372|Q55372_SYNY3	WP_062436324.1	41.935	31	18	0	212	242	32	62	0.30	29.6
tr|Q55372|Q55372_SYNY3	WP_062433174.1	28.358	67	46	1	78	144	381	445	0.33	30.0
tr|Q55372|Q55372_SYNY3	WP_138072468.1	50.000	26	13	0	205	230	20	45	0.40	29.3
tr|Q55372|Q55372_SYNY3	WP_138072716.1	26.797	153	76	7	114	240	271	413	0.51	29.3
tr|Q55372|Q55372_SYNY3	WP_065711842.1	56.000	25	11	0	218	242	33	57	0.72	28.5
tr|Q55372|Q55372_SYNY3	WP_138073659.1	23.308	133	97	1	194	321	7	139	0.72	28.5
tr|Q55372|Q55372_SYNY3	WP_012306671.1	56.522	23	10	0	212	234	2	24	0.84	28.1
ssl2922	P72994	similar to virulence-associated protein VapB	vapB	vapB, ssl2922	Virulence-associated proteins	Cellular Processes
BLAST Output	PCC 11901 Accession	Percentage Identity	Alignment Length	Mismatches	Gap Open	Synechocystis sp. PCC 6803 Start	Synechocystis sp. PCC 6803 End	PCC 11901 Start	PCC 11901 End	E-value	Bit Score
tr|P72994|P72994_SYNY3	WP_099238812.1	39.130	23	14	0	5	27	29	51	0.61	24.6
ssl2923	P72993	similar to virulence-associated protein VapC	vapC	vapC, ssl2923	Virulence-associated proteins	Cellular Processes
BLAST Output	PCC 11901 Accession	Percentage Identity	Alignment Length	Mismatches	Gap Open	Synechocystis sp. PCC 6803 Start	Synechocystis sp. PCC 6803 End	PCC 11901 Start	PCC 11901 End	E-value	Bit Score
tr|P72993|P72993_SYNY3	WP_138073670.1	33.333	75	45	2	3	72	5	79	6.52e-04	32.7
tr|P72993|P72993_SYNY3	WP_181445677.1	42.857	21	12	0	56	76	69	89	0.64	24.6
slr0451	P74686	putative helicase		ski2	Poorly characterised	DNA replication, restriction, modification, recombination, and repair	Large ribosomal protein	0.8560681	113.3	0.0
BLAST Output	PCC 11901 Accession	Percentage Identity	Alignment Length	Mismatches	Gap Open	Synechocystis sp. PCC 6803 Start	Synechocystis sp. PCC 6803 End	PCC 11901 Start	PCC 11901 End	E-value	Bit Score
tr|P74686|P74686_SYNY3	WP_138073674.1	52.864	995	424	10	12	1006	8	957	0.0	1005
tr|P74686|P74686_SYNY3	WP_138073494.1	27.848	158	90	6	12	156	392	538	0.003	38.1
tr|P74686|P74686_SYNY3	WP_138071015.1	24.084	191	119	7	15	199	4	174	0.011	35.8
tr|P74686|P74686_SYNY3	WP_138073042.1	28.947	76	46	1	407	482	271	338	0.12	32.3
tr|P74686|P74686_SYNY3	WP_138073042.1	29.412	68	42	2	18	82	19	83	0.87	29.6
tr|P74686|P74686_SYNY3	WP_138073169.1	30.357	56	38	1	29	83	633	688	0.60	30.4
tr|P74686|P74686_SYNY3	WP_138073504.1	27.632	76	43	2	409	482	265	330	1.00	29.6
slr1134	P73258	mutator MutT homolog			Poorly characterised	DNA replication, restriction, modification, recombination, and repair	PM	0.915154129	16.5	0.0
BLAST Output	PCC 11901 Accession	Percentage Identity	Alignment Length	Mismatches	Gap Open	Synechocystis sp. PCC 6803 Start	Synechocystis sp. PCC 6803 End	PCC 11901 Start	PCC 11901 End	E-value	Bit Score
tr|P73258|P73258_SYNY3	WP_138072612.1	35.821	134	78	5	11	140	1	130	1.02e-20	79.3
tr|P73258|P73258_SYNY3	WP_012307979.1	34.513	113	67	3	40	146	41	152	4.68e-13	60.8
tr|P73258|P73258_SYNY3	WP_030006784.1	42.593	54	27	1	29	78	19	72	1.30e-06	42.0
tr|P73258|P73258_SYNY3	WP_065709871.1	31.667	60	36	2	13	68	42	100	0.52	26.2
tr|P73258|P73258_SYNY3	WP_012308259.1	39.474	38	22	1	49	85	33	70	0.94	25.4
sll0021	Q55661	probable exonuclease			Poorly characterised	DNA replication, restriction, modification, recombination, and repair	Soluble proteins	0.946520021	45.9	0.0
BLAST Output	PCC 11901 Accession	Percentage Identity	Alignment Length	Mismatches	Gap Open	Synechocystis sp. PCC 6803 Start	Synechocystis sp. PCC 6803 End	PCC 11901 Start	PCC 11901 End	E-value	Bit Score
tr|Q55661|Q55661_SYNY3	WP_138071305.1	63.614	404	147	0	1	404	1	404	0.0	555
sll0709	P72665	putative endonuclease		llaI.2, llal.2, sll0709	Poorly characterised	DNA replication, restriction, modification, recombination, and repair	Soluble proteins	0.860409674	54.1	0.0
BLAST Output	PCC 11901 Accession	Percentage Identity	Alignment Length	Mismatches	Gap Open	Synechocystis sp. PCC 6803 Start	Synechocystis sp. PCC 6803 End	PCC 11901 Start	PCC 11901 End	E-value	Bit Score
tr|P72665|P72665_SYNY3	WP_099238584.1	39.216	51	31	0	36	86	166	216	1.14e-06	45.8
sll0729	P74637	probable DNA methyltransferase			Poorly characterised	DNA replication, restriction, modification, recombination, and repair	Soluble proteins	0.831729755	32.8	0.0
BLAST Output	PCC 11901 Accession	Percentage Identity	Alignment Length	Mismatches	Gap Open	Synechocystis sp. PCC 6803 Start	Synechocystis sp. PCC 6803 End	PCC 11901 Start	PCC 11901 End	E-value	Bit Score
tr|P74637|P74637_SYNY3	WP_138073351.1	25.000	196	120	7	18	203	7	185	3.56e-06	43.9
sll0887	Q55361	putative modulator of DNA gyrase; PmbA homolog			Poorly characterised	DNA replication, restriction, modification, recombination, and repair	Soluble proteins	0.911077594	47.6	0.0
BLAST Output	PCC 11901 Accession	Percentage Identity	Alignment Length	Mismatches	Gap Open	Synechocystis sp. PCC 6803 Start	Synechocystis sp. PCC 6803 End	PCC 11901 Start	PCC 11901 End	E-value	Bit Score
tr|Q55361|Q55361_SYNY3	WP_138073552.1	30.000	210	143	4	127	333	129	337	3.22e-14	70.9
tr|Q55361|Q55361_SYNY3	WP_062436707.1	29.487	234	151	10	204	430	187	413	1.43e-10	59.3
tr|Q55361|Q55361_SYNY3	WP_138073118.1	23.293	249	175	7	202	443	186	425	2.45e-10	58.5
tr|Q55361|Q55361_SYNY3	WP_138071873.1	25.726	241	166	7	183	418	189	421	2.86e-09	55.1
tr|Q55361|Q55361_SYNY3	WP_138072174.1	24.823	141	105	1	190	330	189	328	1.04e-05	43.9
tr|Q55361|Q55361_SYNY3	WP_030008130.1	27.419	62	42	1	106	167	148	206	0.25	29.6
tr|Q55361|Q55361_SYNY3	WP_138071329.1	26.250	80	58	1	246	324	268	347	0.27	30.0
sll1366	P74552	putative SNF2 helicase			Poorly characterised	DNA replication, restriction, modification, recombination, and repair	Soluble proteins	0.941415602	115.8	0.0
BLAST Output	PCC 11901 Accession	Percentage Identity	Alignment Length	Mismatches	Gap Open	Synechocystis sp. PCC 6803 Start	Synechocystis sp. PCC 6803 End	PCC 11901 Start	PCC 11901 End	E-value	Bit Score
tr|P74552|P74552_SYNY3	WP_138072608.1	51.906	1023	452	14	1	1019	1	987	0.0	928
tr|P74552|P74552_SYNY3	WP_138071116.1	23.404	188	100	7	577	748	272	431	0.005	37.4
tr|P74552|P74552_SYNY3	WP_138071116.1	25.850	147	98	4	853	991	725	868	0.37	31.2
tr|P74552|P74552_SYNY3	WP_030006744.1	29.333	75	40	3	307	368	241	315	0.33	31.2
slr0920	Q55381	mutator MutT protein			Poorly characterised	DNA replication, restriction, modification, recombination, and repair	Soluble proteins	0.715368505	17.4	0.0
BLAST Output	PCC 11901 Accession	Percentage Identity	Alignment Length	Mismatches	Gap Open	Synechocystis sp. PCC 6803 Start	Synechocystis sp. PCC 6803 End	PCC 11901 Start	PCC 11901 End	E-value	Bit Score
tr|Q55381|Q55381_SYNY3	WP_138072612.1	66.429	140	47	0	1	140	1	140	4.26e-69	202
tr|Q55381|Q55381_SYNY3	WP_012307979.1	37.984	129	73	4	5	127	9	136	4.43e-20	79.7
tr|Q55381|Q55381_SYNY3	WP_030006784.1	30.894	123	71	6	5	117	2	120	1.58e-05	38.9
tr|Q55381|Q55381_SYNY3	WP_138072728.1	52.381	21	10	0	23	43	126	146	0.39	26.9
tr|Q55381|Q55381_SYNY3	WP_030007882.1	32.558	43	22	2	114	149	81	123	0.67	26.2
slr1322	P74002	putative modulator of DNA gyrase; TldD	tldD		Poorly characterised	DNA replication, restriction, modification, recombination, and repair	Soluble proteins	0.909728744	53.1	0.0
BLAST Output	PCC 11901 Accession	Percentage Identity	Alignment Length	Mismatches	Gap Open	Synechocystis sp. PCC 6803 Start	Synechocystis sp. PCC 6803 End	PCC 11901 Start	PCC 11901 End	E-value	Bit Score
sp|P74002|Y1322_SYNY3	WP_138073552.1	26.991	452	307	9	51	489	22	463	7.24e-34	129
sp|P74002|Y1322_SYNY3	WP_138071873.1	24.724	453	319	10	43	487	23	461	4.26e-27	110
sp|P74002|Y1322_SYNY3	WP_062436707.1	22.695	423	279	14	61	472	32	417	5.19e-16	76.6
sp|P74002|Y1322_SYNY3	WP_138073118.1	19.249	426	301	8	34	449	8	400	1.28e-12	65.9
sp|P74002|Y1322_SYNY3	WP_138071329.1	22.851	442	302	15	35	449	21	450	2.53e-08	52.4
sp|P74002|Y1322_SYNY3	WP_138072174.1	19.780	182	129	4	255	433	224	391	0.34	29.6
slr1543	P73427	DNA-damage-inducible protein F			Poorly characterised	DNA replication, restriction, modification, recombination, and repair	TM	0.919812325	51.6	11.0
BLAST Output	PCC 11901 Accession	Percentage Identity	Alignment Length	Mismatches	Gap Open	Synechocystis sp. PCC 6803 Start	Synechocystis sp. PCC 6803 End	PCC 11901 Start	PCC 11901 End	E-value	Bit Score
sll1537	P74341	similar to mutator MutT protein			Poorly characterised	DNA replication, restriction, modification, recombination, and repair	Unknown	0.532743684	15.9	0.0
BLAST Output	PCC 11901 Accession	Percentage Identity	Alignment Length	Mismatches	Gap Open	Synechocystis sp. PCC 6803 Start	Synechocystis sp. PCC 6803 End	PCC 11901 Start	PCC 11901 End	E-value	Bit Score
tr|P74341|P74341_SYNY3	WP_030006784.1	38.710	62	34	2	5	62	4	65	1.40e-07	44.3
tr|P74341|P74341_SYNY3	WP_138072612.1	27.536	69	49	1	13	80	16	84	4.27e-06	40.4
tr|P74341|P74341_SYNY3	WP_012307979.1	45.455	33	18	0	29	61	39	71	1.59e-04	36.6
tr|P74341|P74341_SYNY3	WP_138073845.1	23.944	142	97	3	1	137	1	136	0.72	26.2
slr0915	Q57253	putative endonuclease [encoded in trnfM-intron: 2791054 - 2791708]		I-Ssp6803I, trnfM	Poorly characterised	DNA replication, restriction, modification, recombination, and repair	Unknown	0.562166533	17.3	0.0
BLAST Output	PCC 11901 Accession	Percentage Identity	Alignment Length	Mismatches	Gap Open	Synechocystis sp. PCC 6803 Start	Synechocystis sp. PCC 6803 End	PCC 11901 Start	PCC 11901 End	E-value	Bit Score
tr|Q57253|Q57253_SYNY3	WP_138073707.1	28.846	52	34	1	3	54	661	709	0.52	26.9
sll7103	Q6ZE95	exodeoxyribonuclease V, alpha chain			Poorly characterised	DNA replication, restriction, modification, recombination, and repair
BLAST Output	PCC 11901 Accession	Percentage Identity	Alignment Length	Mismatches	Gap Open	Synechocystis sp. PCC 6803 Start	Synechocystis sp. PCC 6803 End	PCC 11901 Start	PCC 11901 End	E-value	Bit Score
tr|Q6ZE95|Q6ZE95_SYNY3	WP_138072515.1	28.916	83	46	2	23	92	577	659	0.090	28.5
tr|Q6ZE95|Q6ZE95_SYNY3	WP_012306577.1	30.769	52	32	1	17	68	85	132	0.10	28.5
tr|Q6ZE95|Q6ZE95_SYNY3	WP_138071772.1	28.070	57	36	1	40	91	676	732	0.80	25.8
tr|Q6ZE95|Q6ZE95_SYNY3	WP_138073138.1	45.455	22	12	0	48	69	452	473	0.95	25.4
sll7106	Q6ZE92	exodeoxyribonuclease V, alpha chain			Poorly characterised	DNA replication, restriction, modification, recombination, and repair
BLAST Output	PCC 11901 Accession	Percentage Identity	Alignment Length	Mismatches	Gap Open	Synechocystis sp. PCC 6803 Start	Synechocystis sp. PCC 6803 End	PCC 11901 Start	PCC 11901 End	E-value	Bit Score
tr|Q6ZE92|Q6ZE92_SYNY3	WP_065710337.1	28.571	77	52	2	289	365	150	223	0.038	33.5
slr0733	P72680	integrase-recombinase protein		xerC	Poorly characterised	DNA replication, restriction, modification, recombination, and repair
BLAST Output	PCC 11901 Accession	Percentage Identity	Alignment Length	Mismatches	Gap Open	Synechocystis sp. PCC 6803 Start	Synechocystis sp. PCC 6803 End	PCC 11901 Start	PCC 11901 End	E-value	Bit Score
sp|P72680|XER_SYNY3	WP_138071834.1	52.716	313	142	5	6	313	10	321	1.08e-106	310
sp|P72680|XER_SYNY3	WP_099238916.1	45.946	37	18	1	275	309	38	74	0.058	31.2
sp|P72680|XER_SYNY3	WP_030008132.1	32.759	58	32	1	127	184	193	243	0.19	29.6
sp|P72680|XER_SYNY3	WP_062432115.1	24.638	69	48	1	90	154	178	246	0.39	28.9
slr0790	Q55931	similar to ultraviolet light resistance protein B		umuC	Poorly characterised	DNA replication, restriction, modification, recombination, and repair
BLAST Output	PCC 11901 Accession	Percentage Identity	Alignment Length	Mismatches	Gap Open	Synechocystis sp. PCC 6803 Start	Synechocystis sp. PCC 6803 End	PCC 11901 Start	PCC 11901 End	E-value	Bit Score
slr6084	Q6YRS0	probable antirestriction protein			Poorly characterised	DNA replication, restriction, modification, recombination, and repair
BLAST Output	PCC 11901 Accession	Percentage Identity	Alignment Length	Mismatches	Gap Open	Synechocystis sp. PCC 6803 Start	Synechocystis sp. PCC 6803 End	PCC 11901 Start	PCC 11901 End	E-value	Bit Score
tr|Q6YRS0|Q6YRS0_SYNY3	WP_138071126.1	52.571	175	73	2	3	167	7	181	2.59e-54	167
tr|Q6YRS0|Q6YRS0_SYNY3	WP_138071201.1	52.000	175	74	2	3	167	7	181	2.61e-53	164
tr|Q6YRS0|Q6YRS0_SYNY3	WP_138071085.1	51.765	170	72	2	3	162	7	176	3.87e-51	158
slr6084	Q6YRS0	probable antirestriction protein			Poorly characterised	DNA replication, restriction, modification, recombination, and repair
BLAST Output	PCC 11901 Accession	Percentage Identity	Alignment Length	Mismatches	Gap Open	Synechocystis sp. PCC 6803 Start	Synechocystis sp. PCC 6803 End	PCC 11901 Start	PCC 11901 End	E-value	Bit Score
tr|Q6YRS0|Q6YRS0_SYNY3	WP_138071126.1	52.571	175	73	2	3	167	7	181	2.59e-54	167
tr|Q6YRS0|Q6YRS0_SYNY3	WP_138071201.1	52.000	175	74	2	3	167	7	181	2.61e-53	164
tr|Q6YRS0|Q6YRS0_SYNY3	WP_138071085.1	51.765	170	72	2	3	162	7	176	3.87e-51	158
sll1019	P72933	hydroxyacylglutathione hydrolase		gloB	Pyruvate and acetyl-CoA metabolism	Energy Metabolism	Soluble proteins	0.718312881	28.7	0.0
BLAST Output	PCC 11901 Accession	Percentage Identity	Alignment Length	Mismatches	Gap Open	Synechocystis sp. PCC 6803 Start	Synechocystis sp. PCC 6803 End	PCC 11901 Start	PCC 11901 End	E-value	Bit Score
sp|P72933|GLO2_SYNY3	WP_138073498.1	57.143	259	109	1	1	257	1	259	2.32e-94	275
sp|P72933|GLO2_SYNY3	WP_138071945.1	31.765	170	103	5	12	177	13	173	4.49e-16	71.6
sp|P72933|GLO2_SYNY3	WP_138071867.1	33.750	80	34	4	50	111	58	136	0.005	34.3
sp|P72933|GLO2_SYNY3	WP_138071914.1	43.243	37	17	1	125	161	311	343	0.83	27.3
slr0091	Q55811	aldehyde dehydrogenase		SynAlh1	Pyruvate and acetyl-CoA metabolism	Energy Metabolism	TM	0.894814818	51.2	0.0
BLAST Output	PCC 11901 Accession	Percentage Identity	Alignment Length	Mismatches	Gap Open	Synechocystis sp. PCC 6803 Start	Synechocystis sp. PCC 6803 End	PCC 11901 Start	PCC 11901 End	E-value	Bit Score
tr|Q55811|Q55811_SYNY3	WP_138071828.1	23.853	436	304	7	8	428	29	451	1.09e-33	128
tr|Q55811|Q55811_SYNY3	WP_168191138.1	26.524	328	225	6	103	415	653	979	5.11e-30	120
tr|Q55811|Q55811_SYNY3	WP_138073108.1	63.158	19	7	0	244	262	325	343	0.52	28.9
tr|Q55811|Q55811_SYNY3	WP_138073624.1	29.825	57	38	2	63	118	52	107	0.54	28.9
tr|Q55811|Q55811_SYNY3	WP_138072293.1	23.729	177	94	7	60	199	55	227	0.79	28.5
sll1641	P73043	glutamate decarboxylase		gad	Random proteins (Amino acids and amines)	Energy Metabolism	Soluble proteins	0.763673719	53.0	0.0
BLAST Output	PCC 11901 Accession	Percentage Identity	Alignment Length	Mismatches	Gap Open	Synechocystis sp. PCC 6803 Start	Synechocystis sp. PCC 6803 End	PCC 11901 Start	PCC 11901 End	E-value	Bit Score
tr|P73043|P73043_SYNY3	WP_138072935.1	30.216	139	71	8	189	326	124	237	0.031	33.1
tr|P73043|P73043_SYNY3	WP_138073853.1	41.860	43	21	1	191	233	266	304	0.10	31.2
sll0034	Q55454	putative carboxypeptidase		vanY	Other	Other Categories	PM	0.906949954	28.6	1.0
BLAST Output	PCC 11901 Accession	Percentage Identity	Alignment Length	Mismatches	Gap Open	Synechocystis sp. PCC 6803 Start	Synechocystis sp. PCC 6803 End	PCC 11901 Start	PCC 11901 End	E-value	Bit Score
tr|Q55454|Q55454_SYNY3	WP_181445665.1	53.846	247	101	3	15	250	15	259	1.34e-86	255
tr|Q55454|Q55454_SYNY3	WP_138073275.1	38.710	31	19	0	44	74	22	52	0.73	27.3
sll0501	Q55487	probable glycosyltransferase			Other	Other Categories	PM	0.932877127	36.6	2.0
BLAST Output	PCC 11901 Accession	Percentage Identity	Alignment Length	Mismatches	Gap Open	Synechocystis sp. PCC 6803 Start	Synechocystis sp. PCC 6803 End	PCC 11901 Start	PCC 11901 End	E-value	Bit Score
sp|Q55487|Y501_SYNY3	WP_138072774.1	45.955	309	166	1	3	310	2	310	1.68e-103	302
sp|Q55487|Y501_SYNY3	WP_065711106.1	32.698	315	202	3	2	308	14	326	2.78e-43	148
sp|Q55487|Y501_SYNY3	WP_030006148.1	32.292	96	61	2	5	97	4	98	2.53e-07	47.8
sp|Q55487|Y501_SYNY3	WP_138072519.1	30.189	106	71	2	5	108	108	212	3.52e-06	44.7
sp|Q55487|Y501_SYNY3	WP_138073297.1	40.741	54	23	3	1	51	1	48	0.014	33.1
sp|Q55487|Y501_SYNY3	WP_138073113.1	28.571	70	45	2	253	317	277	346	0.18	29.6
sp|Q55487|Y501_SYNY3	WP_012308058.1	31.579	38	26	0	217	254	59	96	0.65	27.3
sll1020	P72930	probable glycosyltransferase			Other	Other Categories	PM	0.903841009	31.3	0.0
BLAST Output	PCC 11901 Accession	Percentage Identity	Alignment Length	Mismatches	Gap Open	Synechocystis sp. PCC 6803 Start	Synechocystis sp. PCC 6803 End	PCC 11901 Start	PCC 11901 End	E-value	Bit Score
tr|P72930|P72930_SYNY3	WP_065711106.1	27.344	256	134	7	21	268	14	225	2.67e-18	80.1
tr|P72930|P72930_SYNY3	WP_138072774.1	26.250	160	71	6	25	180	5	121	3.46e-06	44.3
tr|P72930|P72930_SYNY3	WP_138073297.1	39.655	58	25	3	23	76	4	55	1.60e-04	38.9
tr|P72930|P72930_SYNY3	WP_030006148.1	35.385	65	30	3	24	81	4	63	1.62e-04	38.9
tr|P72930|P72930_SYNY3	WP_138073559.1	37.778	45	27	1	24	68	53	96	7.07e-04	37.4
tr|P72930|P72930_SYNY3	WP_138073299.1	32.000	50	33	1	21	70	3	51	0.050	31.2
tr|P72930|P72930_SYNY3	WP_138072519.1	34.884	43	26	1	119	159	164	206	0.14	30.0
tr|P72930|P72930_SYNY3	WP_071925405.1	38.462	39	22	1	28	66	1	37	0.36	28.5
tr|P72930|P72930_SYNY3	WP_138071301.1	25.287	87	58	2	16	95	57	143	0.66	27.7
sll1369	P74173	putative peptidase			Other	Other Categories	PM	0.921184152	46.4	0.0
BLAST Output	PCC 11901 Accession	Percentage Identity	Alignment Length	Mismatches	Gap Open	Synechocystis sp. PCC 6803 Start	Synechocystis sp. PCC 6803 End	PCC 11901 Start	PCC 11901 End	E-value	Bit Score
tr|P74173|P74173_SYNY3	WP_138072511.1	48.232	396	200	3	29	421	39	432	5.04e-121	356
tr|P74173|P74173_SYNY3	WP_138072825.1	31.613	155	96	4	228	377	310	459	2.01e-08	52.4
tr|P74173|P74173_SYNY3	WP_138072825.1	25.000	92	66	2	75	166	66	154	0.89	28.1
tr|P74173|P74173_SYNY3	WP_138072043.1	29.333	75	46	2	258	332	111	178	0.44	28.9
tr|P74173|P74173_SYNY3	WP_138073738.1	41.860	43	22	2	268	310	332	371	0.70	28.5
sll1968	P73373	photomixotrophic growth related protein, PmgA	pmgA	pmgA	Other	Other Categories	PM	0.826685814	25.3	0.0
BLAST Output	PCC 11901 Accession	Percentage Identity	Alignment Length	Mismatches	Gap Open	Synechocystis sp. PCC 6803 Start	Synechocystis sp. PCC 6803 End	PCC 11901 Start	PCC 11901 End	E-value	Bit Score
tr|P73373|P73373_SYNY3	WP_012306187.1	49.342	152	70	1	52	203	1	145	2.16e-48	152
tr|P73373|P73373_SYNY3	WP_138071500.1	26.000	100	56	6	109	202	1323	1410	0.17	29.3
tr|P73373|P73373_SYNY3	WP_030006977.1	27.473	91	56	4	109	196	312	395	0.47	27.7
tr|P73373|P73373_SYNY3	WP_138071434.1	23.478	115	71	4	65	167	154	263	0.97	26.9
sll5052	Q6ZES8	similar to exopolysaccharide export protein		gumC	Other	Other Categories	PM	0.949970787	82.9	1.0
BLAST Output	PCC 11901 Accession	Percentage Identity	Alignment Length	Mismatches	Gap Open	Synechocystis sp. PCC 6803 Start	Synechocystis sp. PCC 6803 End	PCC 11901 Start	PCC 11901 End	E-value	Bit Score
tr|Q6ZES8|Q6ZES8_SYNY3	WP_138073282.1	25.672	744	460	22	31	738	47	733	1.68e-55	200
tr|Q6ZES8|Q6ZES8_SYNY3	WP_065709990.1	36.538	52	20	1	679	730	125	163	0.035	33.5
slr6070	Q6YRT4	probable nuclease			Other	Other Categories
BLAST Output	PCC 11901 Accession	Percentage Identity	Alignment Length	Mismatches	Gap Open	Synechocystis sp. PCC 6803 Start	Synechocystis sp. PCC 6803 End	PCC 11901 Start	PCC 11901 End	E-value	Bit Score
slr6070	Q6YRT4	probable nuclease			Other	Other Categories
BLAST Output	PCC 11901 Accession	Percentage Identity	Alignment Length	Mismatches	Gap Open	Synechocystis sp. PCC 6803 Start	Synechocystis sp. PCC 6803 End	PCC 11901 Start	PCC 11901 End	E-value	Bit Score
sll0135	P0DJF8	putative 5'-methylthioadenosine phosphorylase			Other	Other Categories	Soluble proteins	0.790137818	34.5	0.0
BLAST Output	PCC 11901 Accession	Percentage Identity	Alignment Length	Mismatches	Gap Open	Synechocystis sp. PCC 6803 Start	Synechocystis sp. PCC 6803 End	PCC 11901 Start	PCC 11901 End	E-value	Bit Score
sp|P0DJF8|MTAP_SYNY3	WP_138072063.1	72.101	276	77	0	46	321	14	289	4.85e-151	422
sll0222	P72715	putative purple acid phosphatase		phoA	Other	Other Categories	Soluble proteins	0.711815262	36.0	1.0
BLAST Output	PCC 11901 Accession	Percentage Identity	Alignment Length	Mismatches	Gap Open	Synechocystis sp. PCC 6803 Start	Synechocystis sp. PCC 6803 End	PCC 11901 Start	PCC 11901 End	E-value	Bit Score
tr|P72715|P72715_SYNY3	WP_138072629.1	27.778	108	65	5	149	244	86	192	0.017	32.7
sll0245	P73886	probable GTP binding protein			Other	Other Categories	Soluble proteins	0.84195656	39.3	0.0
BLAST Output	PCC 11901 Accession	Percentage Identity	Alignment Length	Mismatches	Gap Open	Synechocystis sp. PCC 6803 Start	Synechocystis sp. PCC 6803 End	PCC 11901 Start	PCC 11901 End	E-value	Bit Score
tr|P73886|P73886_SYNY3	WP_062434581.1	77.747	364	80	1	1	363	1	364	0.0	550
tr|P73886|P73886_SYNY3	WP_138073307.1	36.879	141	57	5	5	140	163	276	1.72e-16	76.3
tr|P73886|P73886_SYNY3	WP_181445693.1	33.010	103	51	5	5	104	397	484	6.08e-05	41.2
tr|P73886|P73886_SYNY3	WP_138073360.1	47.222	36	18	1	3	38	20	54	0.006	35.0
tr|P73886|P73886_SYNY3	WP_138072031.1	55.172	29	13	0	2	30	123	151	0.007	34.3
tr|P73886|P73886_SYNY3	WP_138073099.1	38.776	49	27	1	2	47	222	270	0.009	34.3
tr|P73886|P73886_SYNY3	WP_012305762.1	50.000	26	13	0	2	27	177	202	0.049	32.0
tr|P73886|P73886_SYNY3	WP_012305762.1	41.935	31	18	0	6	36	8	38	0.22	30.0
tr|P73886|P73886_SYNY3	WP_030007130.1	27.928	111	57	3	2	94	18	123	0.077	31.2
tr|P73886|P73886_SYNY3	WP_138072772.1	25.893	112	61	3	3	114	29	118	0.10	30.8
sll0395	Q55734	phosphoglycerate mutase		sll0395	Other	Other Categories	Soluble proteins	0.852202097	23.7	0.0
BLAST Output	PCC 11901 Accession	Percentage Identity	Alignment Length	Mismatches	Gap Open	Synechocystis sp. PCC 6803 Start	Synechocystis sp. PCC 6803 End	PCC 11901 Start	PCC 11901 End	E-value	Bit Score
tr|Q55734|Q55734_SYNY3	WP_138071571.1	28.986	207	139	5	3	202	226	431	1.79e-17	76.6
tr|Q55734|Q55734_SYNY3	WP_138071571.1	25.556	180	124	5	1	171	1	179	7.31e-12	60.1
tr|Q55734|Q55734_SYNY3	WP_138073094.1	26.901	171	112	6	5	166	15	181	6.37e-11	56.6
sll0576	P74729	putative sugar-nucleotide epimerase/dehydratease			Other	Other Categories	Soluble proteins	0.920152501	34.9	0.0
BLAST Output	PCC 11901 Accession	Percentage Identity	Alignment Length	Mismatches	Gap Open	Synechocystis sp. PCC 6803 Start	Synechocystis sp. PCC 6803 End	PCC 11901 Start	PCC 11901 End	E-value	Bit Score
tr|P74729|P74729_SYNY3	WP_138073475.1	27.600	250	158	11	2	234	1	244	7.45e-15	70.5
tr|P74729|P74729_SYNY3	WP_138071301.1	26.855	283	182	15	3	270	1	273	5.85e-10	55.8
tr|P74729|P74729_SYNY3	WP_138073408.1	26.337	243	148	10	5	221	6	243	8.79e-10	55.5
tr|P74729|P74729_SYNY3	WP_138073777.1	22.819	298	184	14	3	285	1	267	2.52e-04	38.5
tr|P74729|P74729_SYNY3	WP_138073434.1	23.830	235	146	10	3	233	1	206	0.005	34.7
tr|P74729|P74729_SYNY3	WP_138071899.1	27.586	87	47	3	4	90	8	78	0.008	33.9
tr|P74729|P74729_SYNY3	WP_065710302.1	36.364	33	21	0	3	35	1	33	0.28	29.3
sll0644	P72953	probable esterase			Other	Other Categories	Soluble proteins	0.834869666	36.4	0.0
BLAST Output	PCC 11901 Accession	Percentage Identity	Alignment Length	Mismatches	Gap Open	Synechocystis sp. PCC 6803 Start	Synechocystis sp. PCC 6803 End	PCC 11901 Start	PCC 11901 End	E-value	Bit Score
tr|P72953|P72953_SYNY3	WP_138073875.1	29.437	231	135	8	102	317	91	308	1.42e-15	72.8
tr|P72953|P72953_SYNY3	WP_138071547.1	35.821	67	35	2	263	329	148	206	0.14	29.6
tr|P72953|P72953_SYNY3	WP_030006429.1	19.685	127	82	4	5	125	39	151	0.51	28.1
sll1033	P72756	probable protein phosphatase			Other	Other Categories	Soluble proteins	0.803281394	73.7	0.0
BLAST Output	PCC 11901 Accession	Percentage Identity	Alignment Length	Mismatches	Gap Open	Synechocystis sp. PCC 6803 Start	Synechocystis sp. PCC 6803 End	PCC 11901 Start	PCC 11901 End	E-value	Bit Score
tr|P72756|P72756_SYNY3	WP_138071756.1	36.115	695	374	13	1	663	1	657	3.76e-139	419
tr|P72756|P72756_SYNY3	WP_138073462.1	34.944	269	154	6	404	664	267	522	7.41e-37	143
tr|P72756|P72756_SYNY3	WP_138071614.1	25.625	480	252	14	212	655	89	499	1.40e-27	114
tr|P72756|P72756_SYNY3	WP_168191165.1	34.389	221	134	6	440	659	31	241	3.57e-26	104
tr|P72756|P72756_SYNY3	WP_138072939.1	33.803	71	44	2	1	68	1	71	1.72e-04	40.4
tr|P72756|P72756_SYNY3	WP_138073915.1	33.962	53	27	2	4	48	206	258	0.22	30.4
sll1129	P73490	2-hydroxy-6-oxohepta-2,4-dienoate hydrolase		todF	Other	Other Categories	Soluble proteins	0.697900597	32.8	0.0
BLAST Output	PCC 11901 Accession	Percentage Identity	Alignment Length	Mismatches	Gap Open	Synechocystis sp. PCC 6803 Start	Synechocystis sp. PCC 6803 End	PCC 11901 Start	PCC 11901 End	E-value	Bit Score
tr|P73490|P73490_SYNY3	WP_138072871.1	48.148	297	148	3	1	295	1	293	9.09e-95	279
tr|P73490|P73490_SYNY3	WP_138073102.1	28.369	282	176	5	29	284	1	282	7.79e-26	100
tr|P73490|P73490_SYNY3	WP_138073692.1	28.102	274	166	10	43	294	25	289	3.49e-21	87.8
tr|P73490|P73490_SYNY3	WP_138071980.1	27.907	258	167	9	46	285	25	281	9.87e-20	84.0
tr|P73490|P73490_SYNY3	WP_138073725.1	25.391	256	168	7	49	284	33	285	2.59e-17	77.0
tr|P73490|P73490_SYNY3	WP_138071722.1	26.022	269	144	13	55	294	23	265	8.72e-13	63.5
tr|P73490|P73490_SYNY3	WP_138073310.1	27.068	266	150	11	55	294	28	275	2.68e-11	59.3
tr|P73490|P73490_SYNY3	WP_138073338.1	23.913	276	166	8	48	293	27	288	2.91e-11	59.3
tr|P73490|P73490_SYNY3	WP_138073319.1	25.150	167	117	3	52	212	27	191	6.06e-09	52.4
tr|P73490|P73490_SYNY3	WP_138072708.1	26.957	115	73	2	46	155	19	127	8.72e-06	42.7
tr|P73490|P73490_SYNY3	WP_138073813.1	24.812	266	177	8	43	294	19	275	1.49e-05	42.0
tr|P73490|P73490_SYNY3	WP_138073101.1	23.596	267	160	9	55	293	2461	2711	0.002	36.2
tr|P73490|P73490_SYNY3	WP_138072916.1	22.182	275	170	9	44	277	23	294	0.005	34.3
tr|P73490|P73490_SYNY3	WP_138073159.1	34.783	46	30	0	114	159	75	120	0.035	31.6
tr|P73490|P73490_SYNY3	WP_138073493.1	39.474	38	23	0	116	153	54	91	0.078	30.4
tr|P73490|P73490_SYNY3	WP_138073171.1	46.875	32	17	0	119	150	64	95	0.083	30.4
sll1298	P73163	putative carboxymethylenebutenolidase		clcD	Other	Other Categories	Soluble proteins	0.754703787	26.9	0.0
BLAST Output	PCC 11901 Accession	Percentage Identity	Alignment Length	Mismatches	Gap Open	Synechocystis sp. PCC 6803 Start	Synechocystis sp. PCC 6803 End	PCC 11901 Start	PCC 11901 End	E-value	Bit Score
sp|P73163|DLHH_SYNY3	WP_138071822.1	63.223	242	88	1	5	245	4	245	7.33e-110	313
sp|P73163|DLHH_SYNY3	WP_065716323.1	23.478	230	151	6	21	243	41	252	4.90e-14	66.2
sp|P73163|DLHH_SYNY3	WP_138071786.1	28.571	70	46	1	164	233	553	618	0.065	30.8
sll1300	P73161	putative methyltransferase			Other	Other Categories	Soluble proteins	0.834453711	24.4	0.0
BLAST Output	PCC 11901 Accession	Percentage Identity	Alignment Length	Mismatches	Gap Open	Synechocystis sp. PCC 6803 Start	Synechocystis sp. PCC 6803 End	PCC 11901 Start	PCC 11901 End	E-value	Bit Score
sp|P73161|TRMB_SYNY3	WP_138073776.1	56.190	210	91	1	1	209	1	210	9.19e-85	247
sp|P73161|TRMB_SYNY3	WP_138072827.1	22.286	175	93	8	14	174	17	162	0.007	32.7
sp|P73161|TRMB_SYNY3	WP_138072814.1	29.167	48	26	1	39	86	49	88	0.024	31.2
sp|P73161|TRMB_SYNY3	WP_138073490.1	31.915	47	32	0	39	85	41	87	0.18	28.9
sp|P73161|TRMB_SYNY3	WP_012307841.1	22.340	94	66	3	28	117	15	105	0.19	27.7
sp|P73161|TRMB_SYNY3	WP_138073385.1	27.523	109	67	5	38	137	27	132	0.22	28.5
sp|P73161|TRMB_SYNY3	WP_138072685.1	23.596	89	56	3	11	92	61	144	0.34	27.7
sll1305	P73598	probable hydrolase		sll1305	Other	Other Categories	Soluble proteins	0.882245641	32.9	0.0
BLAST Output	PCC 11901 Accession	Percentage Identity	Alignment Length	Mismatches	Gap Open	Synechocystis sp. PCC 6803 Start	Synechocystis sp. PCC 6803 End	PCC 11901 Start	PCC 11901 End	E-value	Bit Score
tr|P73598|P73598_SYNY3	WP_138073319.1	30.645	124	76	1	34	157	27	140	2.85e-09	53.5
tr|P73598|P73598_SYNY3	WP_138073102.1	32.800	125	75	3	12	127	4	128	4.51e-09	52.8
tr|P73598|P73598_SYNY3	WP_138073338.1	25.926	135	88	2	37	159	34	168	3.86e-07	47.0
tr|P73598|P73598_SYNY3	WP_138071980.1	25.185	135	97	2	1	134	1	132	6.24e-06	43.1
tr|P73598|P73598_SYNY3	WP_138073692.1	22.559	297	199	11	1	281	1	282	8.77e-06	42.7
tr|P73598|P73598_SYNY3	WP_138073310.1	23.158	285	173	12	31	293	19	279	1.14e-05	42.4
tr|P73598|P73598_SYNY3	WP_138072871.1	27.778	108	76	2	29	134	44	151	9.51e-05	39.7
tr|P73598|P73598_SYNY3	WP_138072708.1	29.268	82	58	0	50	131	41	122	1.77e-04	38.9
tr|P73598|P73598_SYNY3	WP_138073813.1	35.135	74	44	2	36	105	29	102	0.003	35.0
tr|P73598|P73598_SYNY3	WP_138070989.1	32.258	31	21	0	200	230	105	135	0.30	28.1
tr|P73598|P73598_SYNY3	WP_138071970.1	38.710	31	19	0	10	40	4	34	0.35	28.5
tr|P73598|P73598_SYNY3	WP_138073725.1	27.381	84	61	0	30	113	33	116	0.47	28.1
tr|P73598|P73598_SYNY3	WP_138073432.1	34.247	73	43	3	187	256	117	187	0.90	27.7
sll1308	P73591	probable oxidoreductase			Other	Other Categories	Soluble proteins	0.704434384	25.8	0.0
BLAST Output	PCC 11901 Accession	Percentage Identity	Alignment Length	Mismatches	Gap Open	Synechocystis sp. PCC 6803 Start	Synechocystis sp. PCC 6803 End	PCC 11901 Start	PCC 11901 End	E-value	Bit Score
tr|P73591|P73591_SYNY3	WP_138071343.1	26.289	194	133	4	7	192	11	202	9.92e-10	53.9
tr|P73591|P73591_SYNY3	WP_138072043.1	26.667	210	140	9	11	216	3	202	1.36e-08	50.4
tr|P73591|P73591_SYNY3	WP_138071622.1	27.660	188	117	6	6	183	406	584	1.07e-06	45.8
tr|P73591|P73591_SYNY3	WP_138073060.1	39.024	41	25	0	9	49	2	42	0.007	33.5
tr|P73591|P73591_SYNY3	WP_138073277.1	23.223	211	121	7	10	190	14	213	0.060	30.8
tr|P73591|P73591_SYNY3	WP_138073462.1	34.146	41	26	1	174	214	535	574	0.68	27.7
sll1459	P73440	stationary-phase survival protein SurE homolog			Other	Other Categories	Soluble proteins	0.841355464	24.9	0.0
BLAST Output	PCC 11901 Accession	Percentage Identity	Alignment Length	Mismatches	Gap Open	Synechocystis sp. PCC 6803 Start	Synechocystis sp. PCC 6803 End	PCC 11901 Start	PCC 11901 End	E-value	Bit Score
sp|P73440|Y1459_SYNY3	WP_065710656.1	55.702	228	97	2	1	225	1	227	2.45e-93	270
sp|P73440|Y1459_SYNY3	WP_138072460.1	29.891	184	106	6	1	165	7	186	1.25e-16	73.6
sp|P73440|Y1459_SYNY3	WP_138073476.1	34.615	52	29	2	12	63	444	490	0.87	26.9
sll1466	P73434	probable glycosyltransferase			Other	Other Categories	Soluble proteins	0.942344403	47.1	0.0
BLAST Output	PCC 11901 Accession	Percentage Identity	Alignment Length	Mismatches	Gap Open	Synechocystis sp. PCC 6803 Start	Synechocystis sp. PCC 6803 End	PCC 11901 Start	PCC 11901 End	E-value	Bit Score
tr|P73434|P73434_SYNY3	WP_138071472.1	29.851	134	72	3	274	385	214	347	1.09e-09	56.2
tr|P73434|P73434_SYNY3	WP_138073253.1	21.698	212	135	5	181	387	175	360	6.12e-08	50.8
tr|P73434|P73434_SYNY3	WP_030005953.1	35.789	95	59	2	301	394	264	357	1.01e-05	43.9
tr|P73434|P73434_SYNY3	WP_138073302.1	24.752	101	76	0	288	388	284	384	3.70e-05	42.0
tr|P73434|P73434_SYNY3	WP_138073806.1	25.980	204	133	7	188	391	184	369	5.10e-05	41.6
tr|P73434|P73434_SYNY3	WP_138073252.1	28.319	113	69	2	291	394	287	396	1.28e-04	40.4
tr|P73434|P73434_SYNY3	WP_138071066.1	27.642	123	75	6	269	379	214	334	0.002	36.6
tr|P73434|P73434_SYNY3	WP_065710775.1	26.106	226	134	9	181	395	176	379	0.003	35.8
tr|P73434|P73434_SYNY3	WP_138073535.1	26.966	89	65	0	291	379	287	375	0.008	34.7
tr|P73434|P73434_SYNY3	WP_138073291.1	21.097	237	140	6	197	390	135	367	0.030	32.7
tr|P73434|P73434_SYNY3	WP_138071414.1	36.364	44	28	0	323	366	284	327	0.032	32.7
tr|P73434|P73434_SYNY3	WP_065711271.1	34.000	50	31	1	323	372	278	325	0.12	30.8
tr|P73434|P73434_SYNY3	WP_138071980.1	45.455	33	15	1	12	41	45	77	0.32	29.3
sll1489	P74601	circadian phase modifier CpmA homolog	cpmA	cpmA	Other	Other Categories	Soluble proteins	0.923683007	29.3	0.0
BLAST Output	PCC 11901 Accession	Percentage Identity	Alignment Length	Mismatches	Gap Open	Synechocystis sp. PCC 6803 Start	Synechocystis sp. PCC 6803 End	PCC 11901 Start	PCC 11901 End	E-value	Bit Score
tr|P74601|P74601_SYNY3	WP_138072920.1	67.194	253	83	0	15	267	4	256	1.45e-128	362
tr|P74601|P74601_SYNY3	WP_138071891.1	28.986	138	82	7	135	264	8	137	2.05e-06	43.5
sll1621	P73728	AhpC/TSA family protein		type II prx, aphC, PrxII, ahpC, sodB, type II prx, sll1621	Other	Other Categories	Soluble proteins	0.798993966	21.2	0.0
BLAST Output	PCC 11901 Accession	Percentage Identity	Alignment Length	Mismatches	Gap Open	Synechocystis sp. PCC 6803 Start	Synechocystis sp. PCC 6803 End	PCC 11901 Start	PCC 11901 End	E-value	Bit Score
sp|P73728|PRX5_SYNY3	WP_012306421.1	85.946	185	26	0	5	189	3	187	3.58e-120	334
sp|P73728|PRX5_SYNY3	WP_065715821.1	26.230	122	71	4	16	130	14	123	0.002	33.9
sp|P73728|PRX5_SYNY3	WP_030006741.1	23.611	144	82	7	35	170	59	182	0.011	32.0
sll1636	P73050	ferripyochelin binding protein		fbp, yrdA	Other	Other Categories	Soluble proteins	0.82311488	19.5	0.0
BLAST Output	PCC 11901 Accession	Percentage Identity	Alignment Length	Mismatches	Gap Open	Synechocystis sp. PCC 6803 Start	Synechocystis sp. PCC 6803 End	PCC 11901 Start	PCC 11901 End	E-value	Bit Score
tr|P73050|P73050_SYNY3	WP_138071492.1	65.269	167	58	0	20	186	1	167	2.51e-73	215
tr|P73050|P73050_SYNY3	WP_084150040.1	33.582	134	68	2	47	160	66	198	1.27e-13	63.2
tr|P73050|P73050_SYNY3	WP_138072383.1	32.847	137	67	4	45	163	37	166	1.40e-11	57.4
tr|P73050|P73050_SYNY3	WP_138073466.1	33.083	133	75	6	28	147	17	148	3.58e-09	52.0
tr|P73050|P73050_SYNY3	WP_138073298.1	52.273	44	21	0	117	160	143	186	7.19e-09	49.7
tr|P73050|P73050_SYNY3	WP_168191170.1	29.897	97	60	1	72	160	79	175	9.98e-07	43.9
tr|P73050|P73050_SYNY3	WP_138073551.1	45.098	51	28	0	117	167	124	174	1.25e-06	43.5
tr|P73050|P73050_SYNY3	WP_138073759.1	41.509	53	31	0	110	162	119	171	1.35e-06	43.1
tr|P73050|P73050_SYNY3	WP_065710799.1	41.304	46	27	0	116	161	125	170	5.25e-05	39.3
tr|P73050|P73050_SYNY3	WP_138072029.1	32.353	68	43	2	93	158	124	190	0.010	32.3
sll1704	P73688	probable short chain dehydrogenase		csgA, spoC	Other	Other Categories	Soluble proteins	0.931907774	28.4	0.0
BLAST Output	PCC 11901 Accession	Percentage Identity	Alignment Length	Mismatches	Gap Open	Synechocystis sp. PCC 6803 Start	Synechocystis sp. PCC 6803 End	PCC 11901 Start	PCC 11901 End	E-value	Bit Score
tr|P73688|P73688_SYNY3	WP_138072337.1	55.144	243	106	2	16	256	4	245	7.55e-91	265
tr|P73688|P73688_SYNY3	WP_138072043.1	31.148	244	142	6	14	256	3	221	5.55e-30	108
tr|P73688|P73688_SYNY3	WP_138071622.1	25.962	208	123	10	13	211	410	595	5.57e-05	40.4
tr|P73688|P73688_SYNY3	WP_138072074.1	21.333	75	56	1	12	83	12	86	0.62	27.7
sll1723	P73402	probable glycosyltransferase			Other	Other Categories	Soluble proteins	0.712866391	46.2	0.0
BLAST Output	PCC 11901 Accession	Percentage Identity	Alignment Length	Mismatches	Gap Open	Synechocystis sp. PCC 6803 Start	Synechocystis sp. PCC 6803 End	PCC 11901 Start	PCC 11901 End	E-value	Bit Score
tr|P73402|P73402_SYNY3	WP_138073252.1	88.620	413	47	0	1	413	1	413	0.0	766
tr|P73402|P73402_SYNY3	WP_138073302.1	28.019	207	136	4	206	407	203	401	1.94e-17	80.1
tr|P73402|P73402_SYNY3	WP_138073291.1	24.194	248	175	5	149	391	127	366	7.17e-13	65.9
tr|P73402|P73402_SYNY3	WP_138073290.1	25.660	265	156	13	143	393	115	352	2.36e-11	61.6
tr|P73402|P73402_SYNY3	WP_030005953.1	30.303	165	98	4	250	407	214	368	4.83e-11	60.5
tr|P73402|P73402_SYNY3	WP_138073253.1	26.977	215	153	2	172	386	147	357	1.58e-09	55.8
tr|P73402|P73402_SYNY3	WP_065710775.1	23.077	286	190	8	129	394	96	371	3.01e-09	54.7
tr|P73402|P73402_SYNY3	WP_138071414.1	28.070	171	100	6	206	375	186	334	1.79e-08	52.4
tr|P73402|P73402_SYNY3	WP_138072361.1	25.714	140	93	3	232	371	222	350	5.36e-08	50.8
tr|P73402|P73402_SYNY3	WP_138071472.1	41.667	72	41	1	321	391	280	351	3.25e-07	48.5
tr|P73402|P73402_SYNY3	WP_138071066.1	22.326	215	153	4	178	388	137	341	9.20e-07	47.0
tr|P73402|P73402_SYNY3	WP_138072899.1	22.956	318	182	13	129	393	125	432	1.83e-04	40.0
tr|P73402|P73402_SYNY3	WP_138071062.1	24.699	166	110	7	229	390	258	412	0.002	36.6
tr|P73402|P73402_SYNY3	WP_138073806.1	26.380	163	110	4	227	387	209	363	0.009	34.3
tr|P73402|P73402_SYNY3	WP_065711271.1	22.500	200	142	7	192	388	150	339	0.011	33.9
sll1900	Q79EF3	acetyltransferase	act	act	Other	Other Categories	Soluble proteins	0.710271023	23.3	0.0
BLAST Output	PCC 11901 Accession	Percentage Identity	Alignment Length	Mismatches	Gap Open	Synechocystis sp. PCC 6803 Start	Synechocystis sp. PCC 6803 End	PCC 11901 Start	PCC 11901 End	E-value	Bit Score
tr|Q79EF3|Q79EF3_SYNY3	WP_138073551.1	76.667	210	48	1	1	209	1	210	4.50e-123	343
tr|Q79EF3|Q79EF3_SYNY3	WP_084150040.1	40.187	107	49	3	64	170	111	202	4.91e-15	67.4
tr|Q79EF3|Q79EF3_SYNY3	WP_138073759.1	30.556	108	55	3	60	167	83	170	3.03e-10	53.9
tr|Q79EF3|Q79EF3_SYNY3	WP_168191170.1	28.682	129	77	5	46	168	58	177	1.78e-07	46.2
tr|Q79EF3|Q79EF3_SYNY3	WP_138073298.1	33.333	63	42	0	107	169	127	189	7.50e-07	44.3
tr|Q79EF3|Q79EF3_SYNY3	WP_138072383.1	31.304	115	67	4	57	165	54	162	1.18e-05	41.2
tr|Q79EF3|Q79EF3_SYNY3	WP_138073074.1	40.385	52	31	0	113	164	263	314	2.02e-05	40.8
tr|Q79EF3|Q79EF3_SYNY3	WP_138073074.1	41.935	31	18	0	117	147	118	148	0.12	29.3
tr|Q79EF3|Q79EF3_SYNY3	WP_138071492.1	40.816	49	25	1	123	171	98	142	4.30e-04	36.2
tr|Q79EF3|Q79EF3_SYNY3	WP_062436083.1	27.338	139	89	4	20	151	294	427	0.033	31.2
tr|Q79EF3|Q79EF3_SYNY3	WP_012306577.1	34.091	44	25	1	117	160	252	291	0.11	29.6
tr|Q79EF3|Q79EF3_SYNY3	WP_138073466.1	32.432	37	24	1	113	149	108	143	0.13	29.6
tr|Q79EF3|Q79EF3_SYNY3	WP_065710799.1	34.043	47	31	0	117	163	120	166	0.15	28.9
tr|Q79EF3|Q79EF3_SYNY3	WP_138071134.1	33.333	45	28	1	142	186	29	71	0.19	26.9
tr|Q79EF3|Q79EF3_SYNY3	WP_138071390.1	44.000	25	14	0	99	123	186	210	0.77	26.9
tr|Q79EF3|Q79EF3_SYNY3	WP_138071440.1	50.000	18	9	0	93	110	31	48	0.98	25.0
sll1959	P73806	probable inositol monophosphatase		suhB, ssyA	Other	Other Categories	Soluble proteins	0.802763801	29.2	0.0
BLAST Output	PCC 11901 Accession	Percentage Identity	Alignment Length	Mismatches	Gap Open	Synechocystis sp. PCC 6803 Start	Synechocystis sp. PCC 6803 End	PCC 11901 Start	PCC 11901 End	E-value	Bit Score
tr|P73806|P73806_SYNY3	WP_138072617.1	31.507	146	95	3	2	145	6	148	1.14e-17	77.4
tr|P73806|P73806_SYNY3	WP_045441381.1	34.000	100	65	1	43	142	41	139	1.24e-14	68.6
tr|P73806|P73806_SYNY3	WP_030006802.1	26.115	157	104	5	5	155	6	156	5.48e-06	43.1
tr|P73806|P73806_SYNY3	WP_138073367.1	30.159	63	39	3	190	251	70	128	0.26	28.9
tr|P73806|P73806_SYNY3	WP_062432027.1	28.090	89	50	2	107	195	65	139	0.28	28.9
sll1971	P73369	probable hexosyltransferase			Other	Other Categories	Soluble proteins	0.862600812	45.1	0.0
BLAST Output	PCC 11901 Accession	Percentage Identity	Alignment Length	Mismatches	Gap Open	Synechocystis sp. PCC 6803 Start	Synechocystis sp. PCC 6803 End	PCC 11901 Start	PCC 11901 End	E-value	Bit Score
tr|P73369|P73369_SYNY3	WP_065710775.1	67.342	395	129	0	10	404	1	395	0.0	557
tr|P73369|P73369_SYNY3	WP_138071472.1	23.913	322	212	12	92	402	76	375	1.51e-15	73.9
tr|P73369|P73369_SYNY3	WP_138073806.1	24.444	315	217	10	95	399	86	389	9.75e-14	68.6
tr|P73369|P73369_SYNY3	WP_030005953.1	24.924	329	191	14	38	345	26	319	2.15e-13	67.4
tr|P73369|P73369_SYNY3	WP_138071066.1	25.547	274	186	6	124	393	100	359	1.90e-12	64.3
tr|P73369|P73369_SYNY3	WP_138073252.1	21.824	307	206	7	105	399	129	413	3.03e-12	64.3
tr|P73369|P73369_SYNY3	WP_138071062.1	23.529	238	169	6	164	396	202	431	6.52e-12	63.2
tr|P73369|P73369_SYNY3	WP_065711271.1	24.893	233	153	7	165	391	139	355	1.72e-11	61.6
tr|P73369|P73369_SYNY3	WP_138072361.1	27.717	184	122	6	181	361	179	354	2.72e-11	61.2
tr|P73369|P73369_SYNY3	WP_138073253.1	21.728	382	259	11	26	391	19	376	5.29e-11	60.1
tr|P73369|P73369_SYNY3	WP_168191169.1	25.778	225	145	9	164	380	196	406	1.62e-10	58.9
tr|P73369|P73369_SYNY3	WP_138073302.1	19.231	208	162	1	188	395	202	403	1.81e-10	58.5
tr|P73369|P73369_SYNY3	WP_138073301.1	27.586	145	99	4	221	362	187	328	1.05e-09	56.2
tr|P73369|P73369_SYNY3	WP_030008132.1	22.997	387	228	14	62	398	91	457	1.16e-09	56.2
tr|P73369|P73369_SYNY3	WP_138072899.1	21.005	438	276	18	24	402	32	458	4.56e-09	54.7
tr|P73369|P73369_SYNY3	WP_138071414.1	30.612	147	85	6	212	354	194	327	2.75e-08	51.6
tr|P73369|P73369_SYNY3	WP_138073290.1	28.571	147	98	6	221	363	193	336	1.65e-07	49.3
tr|P73369|P73369_SYNY3	WP_062435226.1	28.125	128	84	3	211	333	291	415	3.56e-06	45.4
tr|P73369|P73369_SYNY3	WP_138073295.1	25.217	115	76	5	282	393	254	361	0.027	32.7
tr|P73369|P73369_SYNY3	WP_138073291.1	20.301	266	193	9	95	354	91	343	0.11	30.8
tr|P73369|P73369_SYNY3	WP_138073794.1	32.143	84	51	3	108	186	129	211	0.32	29.6
tr|P73369|P73369_SYNY3	WP_138072367.1	34.615	52	23	2	10	56	1	46	0.83	28.1
sll5066	Q6ZER4	probable plasmid partitioning protein, ParA family		parA	Other	Other Categories	Soluble proteins	0.7879092	22.5	0.0
BLAST Output	PCC 11901 Accession	Percentage Identity	Alignment Length	Mismatches	Gap Open	Synechocystis sp. PCC 6803 Start	Synechocystis sp. PCC 6803 End	PCC 11901 Start	PCC 11901 End	E-value	Bit Score
tr|Q6ZER4|Q6ZER4_SYNY3	WP_138070987.1	34.343	198	122	4	3	195	2	196	8.91e-35	119
tr|Q6ZER4|Q6ZER4_SYNY3	WP_138071079.1	34.343	198	122	4	3	195	2	196	1.10e-34	118
tr|Q6ZER4|Q6ZER4_SYNY3	WP_012306948.1	30.198	202	133	4	2	195	5	206	8.44e-22	85.5
tr|Q6ZER4|Q6ZER4_SYNY3	WP_030008092.1	35.398	113	67	4	1	108	1	112	8.37e-12	58.5
tr|Q6ZER4|Q6ZER4_SYNY3	WP_012305478.1	29.825	114	73	4	1	111	1	110	9.19e-07	44.3
tr|Q6ZER4|Q6ZER4_SYNY3	WP_030007057.1	53.846	39	17	1	1	38	167	205	5.84e-05	39.7
tr|Q6ZER4|Q6ZER4_SYNY3	WP_012306542.1	47.368	38	19	1	2	38	98	135	0.003	34.3
tr|Q6ZER4|Q6ZER4_SYNY3	WP_062436859.1	25.000	92	63	3	2	90	3	91	0.003	33.9
tr|Q6ZER4|Q6ZER4_SYNY3	WP_138071252.1	41.176	51	22	2	4	46	5	55	0.006	33.1
tr|Q6ZER4|Q6ZER4_SYNY3	WP_041443966.1	54.054	37	15	2	4	39	3	38	0.008	32.7
tr|Q6ZER4|Q6ZER4_SYNY3	WP_012307837.1	44.737	38	19	1	3	38	4	41	0.011	32.3
tr|Q6ZER4|Q6ZER4_SYNY3	WP_012306145.1	42.105	38	21	1	2	38	3	40	0.018	31.6
tr|Q6ZER4|Q6ZER4_SYNY3	WP_138073051.1	50.000	32	15	1	10	40	10	41	0.060	30.4
sll6060	Q6YRU4	probable acetyltransferase			Other	Other Categories	Soluble proteins	0.801009162	19.1	0.0
BLAST Output	PCC 11901 Accession	Percentage Identity	Alignment Length	Mismatches	Gap Open	Synechocystis sp. PCC 6803 Start	Synechocystis sp. PCC 6803 End	PCC 11901 Start	PCC 11901 End	E-value	Bit Score
tr|Q6YRU4|Q6YRU4_SYNY3	WP_030007395.1	28.000	75	46	3	79	152	2	69	0.21	27.7
sll6093	Q6YRR1	chromosome partitioning protein, ParA family		parA	Other	Other Categories	Soluble proteins	0.920062287	21.6	0.0
BLAST Output	PCC 11901 Accession	Percentage Identity	Alignment Length	Mismatches	Gap Open	Synechocystis sp. PCC 6803 Start	Synechocystis sp. PCC 6803 End	PCC 11901 Start	PCC 11901 End	E-value	Bit Score
tr|Q6YRR1|Q6YRR1_SYNY3	WP_138070987.1	69.697	198	60	0	1	198	1	198	4.50e-111	312
tr|Q6YRR1|Q6YRR1_SYNY3	WP_138071079.1	69.192	198	61	0	1	198	1	198	3.53e-109	307
tr|Q6YRR1|Q6YRR1_SYNY3	WP_012306948.1	30.693	202	132	2	2	196	6	206	6.26e-25	93.6
tr|Q6YRR1|Q6YRR1_SYNY3	WP_030008092.1	25.366	205	135	9	2	192	3	203	6.93e-12	58.5
tr|Q6YRR1|Q6YRR1_SYNY3	WP_012305478.1	27.041	196	121	7	3	189	4	186	3.41e-05	39.7
tr|Q6YRR1|Q6YRR1_SYNY3	WP_062436859.1	22.000	200	138	7	3	191	5	197	0.001	35.0
tr|Q6YRR1|Q6YRR1_SYNY3	WP_012307837.1	43.478	46	24	1	1	44	3	48	0.002	34.7
tr|Q6YRR1|Q6YRR1_SYNY3	WP_030007057.1	51.220	41	19	1	2	42	169	208	0.003	33.9
tr|Q6YRR1|Q6YRR1_SYNY3	WP_138073282.1	26.400	125	77	3	24	144	632	745	0.004	33.9
tr|Q6YRR1|Q6YRR1_SYNY3	WP_138073352.1	28.409	88	47	4	11	82	110	197	0.026	31.6
tr|Q6YRR1|Q6YRR1_SYNY3	WP_012306145.1	39.474	38	22	1	2	38	4	41	0.12	29.3
tr|Q6YRR1|Q6YRR1_SYNY3	WP_012306542.1	34.211	38	24	1	2	38	99	136	0.44	27.7
tr|Q6YRR1|Q6YRR1_SYNY3	WP_138071252.1	43.902	41	19	2	1	37	1	41	0.59	26.9
sll7044	Q6ZEF4	plasmid partition protein ParA homolog		parA	Other	Other Categories	Soluble proteins	0.854578466	20.7	0.0
BLAST Output	PCC 11901 Accession	Percentage Identity	Alignment Length	Mismatches	Gap Open	Synechocystis sp. PCC 6803 Start	Synechocystis sp. PCC 6803 End	PCC 11901 Start	PCC 11901 End	E-value	Bit Score
tr|Q6ZEF4|Q6ZEF4_SYNY3	WP_062436859.1	32.474	194	125	4	3	190	5	198	1.53e-30	107
tr|Q6ZEF4|Q6ZEF4_SYNY3	WP_012305478.1	35.079	191	118	5	2	188	3	191	1.35e-24	92.0
tr|Q6ZEF4|Q6ZEF4_SYNY3	WP_012306948.1	33.714	175	92	8	3	159	7	175	1.13e-14	66.2
tr|Q6ZEF4|Q6ZEF4_SYNY3	WP_030008092.1	26.613	124	83	2	3	118	4	127	2.49e-04	37.0
tr|Q6ZEF4|Q6ZEF4_SYNY3	WP_138071252.1	46.667	45	18	1	1	39	3	47	2.95e-04	37.0
tr|Q6ZEF4|Q6ZEF4_SYNY3	WP_138071079.1	30.328	122	73	6	1	115	1	117	5.30e-04	35.8
tr|Q6ZEF4|Q6ZEF4_SYNY3	WP_138070987.1	30.328	122	73	6	1	115	1	117	5.55e-04	35.8
tr|Q6ZEF4|Q6ZEF4_SYNY3	WP_030007057.1	41.304	46	21	2	1	40	167	212	0.009	32.7
tr|Q6ZEF4|Q6ZEF4_SYNY3	WP_012307837.1	27.857	140	73	7	3	134	5	124	0.010	32.3
tr|Q6ZEF4|Q6ZEF4_SYNY3	WP_012306542.1	50.000	36	13	1	3	33	100	135	0.012	32.3
tr|Q6ZEF4|Q6ZEF4_SYNY3	WP_012306145.1	75.000	20	5	0	3	22	5	24	0.014	32.0
tr|Q6ZEF4|Q6ZEF4_SYNY3	WP_138073638.1	52.632	19	9	0	1	19	1	19	0.060	30.0
tr|Q6ZEF4|Q6ZEF4_SYNY3	WP_041443966.1	52.174	23	10	1	1	23	1	22	0.25	28.1
tr|Q6ZEF4|Q6ZEF4_SYNY3	WP_138073051.1	68.750	16	5	0	3	18	4	19	0.45	27.3
tr|Q6ZEF4|Q6ZEF4_SYNY3	WP_138071766.1	40.625	32	19	0	2	33	10	41	0.61	26.9
tr|Q6ZEF4|Q6ZEF4_SYNY3	WP_084448966.1	25.974	154	88	6	10	151	361	500	0.77	26.9
slr0007	Q55668	probable sugar-phosphate nucleotidyltransferase			Other	Other Categories	Soluble proteins	0.83147382	27.2	0.0
BLAST Output	PCC 11901 Accession	Percentage Identity	Alignment Length	Mismatches	Gap Open	Synechocystis sp. PCC 6803 Start	Synechocystis sp. PCC 6803 End	PCC 11901 Start	PCC 11901 End	E-value	Bit Score
tr|Q55668|Q55668_SYNY3	WP_012306577.1	28.251	223	148	4	11	227	4	220	5.66e-23	94.4
tr|Q55668|Q55668_SYNY3	WP_030006585.1	26.721	247	161	5	11	242	4	245	8.96e-19	81.3
tr|Q55668|Q55668_SYNY3	WP_062436083.1	24.211	190	127	5	8	189	2	182	1.43e-05	42.0
tr|Q55668|Q55668_SYNY3	WP_062431685.1	30.303	66	44	1	112	175	119	184	6.00e-04	37.0
slr0245	P72702	Histone deacetylase family protein		bcp	Other	Other Categories	Soluble proteins	0.898817604	33.6	0.0
BLAST Output	PCC 11901 Accession	Percentage Identity	Alignment Length	Mismatches	Gap Open	Synechocystis sp. PCC 6803 Start	Synechocystis sp. PCC 6803 End	PCC 11901 Start	PCC 11901 End	E-value	Bit Score
sp|P72702|Y245_SYNY3	WP_138071846.1	57.895	304	127	1	1	303	1	304	6.09e-125	356
sp|P72702|Y245_SYNY3	WP_065710782.1	34.074	135	82	1	125	259	120	247	1.67e-18	80.5
slr0315	Q55922	probable oxidoreductase			Other	Other Categories	Soluble proteins	0.905402154	25.9	0.0
BLAST Output	PCC 11901 Accession	Percentage Identity	Alignment Length	Mismatches	Gap Open	Synechocystis sp. PCC 6803 Start	Synechocystis sp. PCC 6803 End	PCC 11901 Start	PCC 11901 End	E-value	Bit Score
tr|Q55922|Q55922_SYNY3	WP_138071343.1	32.632	190	125	2	4	190	11	200	1.96e-24	94.7
tr|Q55922|Q55922_SYNY3	WP_138073537.1	30.939	181	118	3	10	183	5	185	5.16e-16	72.0
tr|Q55922|Q55922_SYNY3	WP_138071622.1	30.526	190	110	9	7	186	410	587	8.64e-11	58.2
tr|Q55922|Q55922_SYNY3	WP_012305942.1	25.000	180	129	4	10	186	7	183	9.23e-10	53.9
tr|Q55922|Q55922_SYNY3	WP_138073277.1	24.402	209	136	5	5	194	12	217	1.05e-08	51.2
tr|Q55922|Q55922_SYNY3	WP_138072164.1	35.714	70	45	0	5	74	4	73	1.58e-07	47.8
tr|Q55922|Q55922_SYNY3	WP_138072043.1	28.302	106	65	4	10	114	5	100	0.021	32.0
tr|Q55922|Q55922_SYNY3	WP_138073100.1	25.287	87	52	3	144	217	347	433	0.090	30.4
tr|Q55922|Q55922_SYNY3	WP_138072074.1	25.352	71	49	1	9	75	15	85	0.28	28.5
tr|Q55922|Q55922_SYNY3	WP_138072188.1	35.484	31	20	0	150	180	156	186	0.33	28.5
tr|Q55922|Q55922_SYNY3	WP_138071521.1	42.424	33	19	0	2	34	176	208	0.37	28.5
slr0338	Q55548	probable oxidoreductase			Other	Other Categories	Soluble proteins	0.930601661	39.0	0.0
BLAST Output	PCC 11901 Accession	Percentage Identity	Alignment Length	Mismatches	Gap Open	Synechocystis sp. PCC 6803 Start	Synechocystis sp. PCC 6803 End	PCC 11901 Start	PCC 11901 End	E-value	Bit Score
tr|Q55548|Q55548_SYNY3	WP_012306070.1	77.273	330	72	1	18	344	5	334	0.0	540
tr|Q55548|Q55548_SYNY3	WP_138072387.1	20.988	324	233	9	25	340	3	311	1.68e-12	63.9
tr|Q55548|Q55548_SYNY3	WP_138072252.1	33.333	84	54	1	75	156	58	141	6.81e-07	47.0
tr|Q55548|Q55548_SYNY3	WP_012308259.1	42.857	42	22	1	255	296	110	149	0.20	29.3
tr|Q55548|Q55548_SYNY3	WP_138073722.1	42.857	35	19	1	126	159	965	999	0.38	29.3
slr0381	Q55595	lactoylglutathione lyase		gloA	Other	Other Categories	Soluble proteins	0.906469915	14.7	0.0
BLAST Output	PCC 11901 Accession	Percentage Identity	Alignment Length	Mismatches	Gap Open	Synechocystis sp. PCC 6803 Start	Synechocystis sp. PCC 6803 End	PCC 11901 Start	PCC 11901 End	E-value	Bit Score
sp|Q55595|LGUL_SYNY3	WP_030006114.1	79.200	125	26	0	1	125	1	125	2.06e-75	216
sp|Q55595|LGUL_SYNY3	WP_168191161.1	25.581	129	77	4	4	127	7	121	2.20e-04	35.0
sp|Q55595|LGUL_SYNY3	WP_138073450.1	57.895	19	8	0	46	64	196	214	0.32	26.9
slr0537	Q55480	putative sugar kinase			Other	Other Categories	Soluble proteins	0.847985937	35.2	0.0
BLAST Output	PCC 11901 Accession	Percentage Identity	Alignment Length	Mismatches	Gap Open	Synechocystis sp. PCC 6803 Start	Synechocystis sp. PCC 6803 End	PCC 11901 Start	PCC 11901 End	E-value	Bit Score
sp|Q55480|YZ37_SYNY3	WP_138072895.1	28.409	88	57	2	243	324	200	287	0.25	29.3
sp|Q55480|YZ37_SYNY3	WP_138071452.1	24.194	310	198	11	26	315	12	304	0.67	28.1
slr0626	Q55870	probable glycosyltransferase			Other	Other Categories	Soluble proteins	0.885081051	44.3	0.0
BLAST Output	PCC 11901 Accession	Percentage Identity	Alignment Length	Mismatches	Gap Open	Synechocystis sp. PCC 6803 Start	Synechocystis sp. PCC 6803 End	PCC 11901 Start	PCC 11901 End	E-value	Bit Score
tr|Q55870|Q55870_SYNY3	WP_138073746.1	51.786	392	188	1	5	395	4	395	3.56e-132	382
tr|Q55870|Q55870_SYNY3	WP_062434815.1	35.106	94	60	1	269	361	89	182	1.04e-09	55.5
tr|Q55870|Q55870_SYNY3	WP_062434815.1	29.032	93	66	0	284	376	71	163	3.29e-04	38.5
tr|Q55870|Q55870_SYNY3	WP_062434815.1	25.503	149	104	2	201	349	63	204	0.004	35.0
tr|Q55870|Q55870_SYNY3	WP_062434815.1	24.713	174	125	2	176	346	65	235	0.005	35.0
tr|Q55870|Q55870_SYNY3	WP_062434815.1	28.736	87	55	1	293	379	46	125	0.051	31.6
tr|Q55870|Q55870_SYNY3	WP_138071575.1	39.241	79	48	0	274	352	181	259	2.73e-09	54.3
tr|Q55870|Q55870_SYNY3	WP_138071575.1	29.752	121	82	1	256	376	132	249	4.71e-08	50.4
tr|Q55870|Q55870_SYNY3	WP_012307759.1	31.395	86	59	0	293	378	181	266	1.98e-08	51.6
tr|Q55870|Q55870_SYNY3	WP_012307759.1	31.034	87	53	1	293	379	65	144	1.14e-05	43.1
tr|Q55870|Q55870_SYNY3	WP_012307759.1	30.882	68	47	0	309	376	47	114	0.29	29.3
tr|Q55870|Q55870_SYNY3	WP_138071512.1	33.673	98	53	3	3	89	1	97	4.04e-08	51.6
tr|Q55870|Q55870_SYNY3	WP_138073582.1	26.056	142	94	2	221	354	66	204	3.14e-06	45.1
tr|Q55870|Q55870_SYNY3	WP_138073582.1	36.486	74	47	0	281	354	63	136	5.50e-06	44.3
tr|Q55870|Q55870_SYNY3	WP_138073582.1	29.592	98	69	0	276	373	92	189	2.48e-04	39.3
tr|Q55870|Q55870_SYNY3	WP_138073582.1	37.931	58	34	1	319	376	69	124	0.030	32.7
tr|Q55870|Q55870_SYNY3	WP_138072398.1	30.435	115	77	1	261	375	82	193	5.82e-06	44.3
tr|Q55870|Q55870_SYNY3	WP_138072398.1	22.840	162	118	2	178	339	207	361	4.40e-04	38.5
tr|Q55870|Q55870_SYNY3	WP_138072398.1	24.390	82	62	0	295	376	79	160	0.012	33.9
tr|Q55870|Q55870_SYNY3	WP_065711483.1	26.400	125	89	1	255	379	72	193	6.36e-06	43.9
tr|Q55870|Q55870_SYNY3	WP_065711483.1	26.316	114	84	0	274	387	156	269	3.11e-05	41.6
tr|Q55870|Q55870_SYNY3	WP_065711483.1	28.421	95	68	0	293	387	73	167	1.19e-04	40.0
tr|Q55870|Q55870_SYNY3	WP_065711483.1	28.070	57	41	0	320	376	66	122	0.074	31.2
tr|Q55870|Q55870_SYNY3	WP_065711483.1	21.687	166	114	4	184	344	38	192	0.45	28.9
tr|Q55870|Q55870_SYNY3	WP_138071559.1	25.434	173	118	3	178	348	87	250	1.43e-05	42.7
tr|Q55870|Q55870_SYNY3	WP_099238558.1	31.646	79	51	2	286	361	42	120	2.94e-05	40.8
tr|Q55870|Q55870_SYNY3	WP_099238558.1	32.609	46	31	0	282	327	75	120	0.066	30.8
tr|Q55870|Q55870_SYNY3	WP_099238558.1	27.941	68	45	1	312	379	34	97	0.13	30.0
tr|Q55870|Q55870_SYNY3	WP_138073771.1	21.642	134	102	1	243	376	516	646	3.55e-05	42.4
tr|Q55870|Q55870_SYNY3	WP_138073771.1	31.667	60	41	0	286	345	624	683	0.009	34.7
tr|Q55870|Q55870_SYNY3	WP_138071468.1	27.586	87	57	1	293	379	36	116	8.41e-05	40.4
tr|Q55870|Q55870_SYNY3	WP_138071468.1	25.352	71	53	0	306	376	15	85	0.005	35.0
tr|Q55870|Q55870_SYNY3	WP_138071468.1	24.427	131	90	2	252	376	129	256	0.027	32.7
tr|Q55870|Q55870_SYNY3	WP_138071468.1	25.225	111	67	4	265	362	45	152	0.30	29.3
tr|Q55870|Q55870_SYNY3	WP_168191150.1	27.778	108	66	3	286	382	36	142	1.81e-04	38.1
tr|Q55870|Q55870_SYNY3	WP_168191150.1	26.415	53	39	0	331	383	47	99	0.14	29.6
tr|Q55870|Q55870_SYNY3	WP_138073297.1	26.471	102	68	3	4	101	3	101	3.09e-04	38.9
tr|Q55870|Q55870_SYNY3	WP_138073293.1	29.670	91	57	3	3	87	21	110	6.62e-04	37.7
tr|Q55870|Q55870_SYNY3	WP_138073403.1	23.750	80	61	0	297	376	206	285	0.062	31.6
tr|Q55870|Q55870_SYNY3	WP_138071638.1	37.209	43	27	0	303	345	151	193	0.091	31.6
tr|Q55870|Q55870_SYNY3	WP_012307776.1	26.966	89	62	2	307	392	85	173	0.15	29.6
tr|Q55870|Q55870_SYNY3	WP_138073723.1	34.375	64	36	2	280	342	136	194	0.32	29.3
tr|Q55870|Q55870_SYNY3	WP_138073723.1	30.645	62	42	1	295	355	181	242	0.58	28.5
tr|Q55870|Q55870_SYNY3	WP_138073508.1	29.412	51	34	1	24	74	214	262	0.65	28.5
slr0697	Q55959	5-oxoprolinase homolog			Other	Other Categories	Soluble proteins	0.92375583	136.0	0.0
BLAST Output	PCC 11901 Accession	Percentage Identity	Alignment Length	Mismatches	Gap Open	Synechocystis sp. PCC 6803 Start	Synechocystis sp. PCC 6803 End	PCC 11901 Start	PCC 11901 End	E-value	Bit Score
tr|Q55959|Q55959_SYNY3	WP_138071516.1	57.177	1254	462	14	3	1242	13	1205	0.0	1384
tr|Q55959|Q55959_SYNY3	WP_138073580.1	35.294	68	34	2	5	62	178	245	0.95	29.6
slr0782	Q55629	putative flavin-containing monoamine oxidase		slr0782	Other	Other Categories	Soluble proteins	0.893250936	51.4	0.0
BLAST Output	PCC 11901 Accession	Percentage Identity	Alignment Length	Mismatches	Gap Open	Synechocystis sp. PCC 6803 Start	Synechocystis sp. PCC 6803 End	PCC 11901 Start	PCC 11901 End	E-value	Bit Score
sp|Q55629|LAADH_SYNY3	WP_030006437.1	22.481	258	165	9	27	265	5	246	2.94e-05	42.7
sp|Q55629|LAADH_SYNY3	WP_138073436.1	42.500	40	23	0	20	59	2	41	0.007	35.0
sp|Q55629|LAADH_SYNY3	WP_138072513.1	33.962	53	28	1	27	79	5	50	0.021	33.5
sp|Q55629|LAADH_SYNY3	WP_138073502.1	33.803	71	44	2	15	85	6	73	0.078	32.0
sp|Q55629|LAADH_SYNY3	WP_138072806.1	48.276	29	15	0	24	52	17	45	0.56	28.9
slr0825	Q55413	probable peptidase			Other	Other Categories	Soluble proteins	0.883091741	70.1	0.0
BLAST Output	PCC 11901 Accession	Percentage Identity	Alignment Length	Mismatches	Gap Open	Synechocystis sp. PCC 6803 Start	Synechocystis sp. PCC 6803 End	PCC 11901 Start	PCC 11901 End	E-value	Bit Score
tr|Q55413|Q55413_SYNY3	WP_138071786.1	62.085	633	238	2	4	635	1	632	0.0	819
slr0862	P73753	probable sugar kinase		lmbP	Other	Other Categories	Soluble proteins	0.920732775	36.3	0.0
BLAST Output	PCC 11901 Accession	Percentage Identity	Alignment Length	Mismatches	Gap Open	Synechocystis sp. PCC 6803 Start	Synechocystis sp. PCC 6803 End	PCC 11901 Start	PCC 11901 End	E-value	Bit Score
slr0880	P73561	similar to fibronectin binding protein			Other	Other Categories	Soluble proteins	0.891462195	67.4	0.0
BLAST Output	PCC 11901 Accession	Percentage Identity	Alignment Length	Mismatches	Gap Open	Synechocystis sp. PCC 6803 Start	Synechocystis sp. PCC 6803 End	PCC 11901 Start	PCC 11901 End	E-value	Bit Score
tr|P73561|P73561_SYNY3	WP_181445678.1	51.552	580	267	3	1	580	3	568	0.0	593
tr|P73561|P73561_SYNY3	WP_012306540.1	22.388	134	85	4	282	398	5	136	0.93	27.7
slr1109	P72763	similar to ankyrin		ank	Other	Other Categories	Soluble proteins	0.941039475	46.8	0.0
BLAST Output	PCC 11901 Accession	Percentage Identity	Alignment Length	Mismatches	Gap Open	Synechocystis sp. PCC 6803 Start	Synechocystis sp. PCC 6803 End	PCC 11901 Start	PCC 11901 End	E-value	Bit Score
tr|P72763|P72763_SYNY3	WP_138073794.1	33.544	474	232	8	29	439	28	481	1.79e-51	177
tr|P72763|P72763_SYNY3	WP_138073794.1	27.920	351	199	8	5	305	105	451	4.96e-19	85.5
tr|P72763|P72763_SYNY3	WP_138073794.1	29.839	248	155	6	151	391	6	241	2.88e-16	77.0
tr|P72763|P72763_SYNY3	WP_138073794.1	27.034	381	224	10	96	441	18	379	5.35e-16	76.3
tr|P72763|P72763_SYNY3	WP_138073794.1	30.216	139	81	4	3	139	357	481	2.66e-04	39.7
tr|P72763|P72763_SYNY3	WP_138073067.1	31.944	72	45	2	300	368	212	282	0.13	30.8
tr|P72763|P72763_SYNY3	WP_138073916.1	38.333	60	36	1	378	436	88	147	0.26	29.6
slr1115	P72628	probable methyltransferase			Other	Other Categories	Soluble proteins	0.740813859	28.7	0.0
BLAST Output	PCC 11901 Accession	Percentage Identity	Alignment Length	Mismatches	Gap Open	Synechocystis sp. PCC 6803 Start	Synechocystis sp. PCC 6803 End	PCC 11901 Start	PCC 11901 End	E-value	Bit Score
tr|P72628|P72628_SYNY3	WP_138073079.1	31.356	118	71	4	69	186	45	152	7.90e-10	53.9
tr|P72628|P72628_SYNY3	WP_138073460.1	31.746	126	78	5	69	191	145	265	2.86e-09	53.1
tr|P72628|P72628_SYNY3	WP_138072814.1	29.091	110	69	4	74	180	48	151	6.77e-07	45.4
tr|P72628|P72628_SYNY3	WP_138072827.1	29.630	108	68	4	73	179	47	147	1.45e-06	44.3
tr|P72628|P72628_SYNY3	WP_030006221.1	27.586	116	80	2	75	189	53	165	2.40e-06	43.9
tr|P72628|P72628_SYNY3	WP_138073548.1	31.034	145	83	6	68	200	53	192	9.97e-06	42.7
tr|P72628|P72628_SYNY3	WP_138073261.1	24.204	157	71	4	74	186	70	222	3.57e-05	40.8
tr|P72628|P72628_SYNY3	WP_138071792.1	24.800	125	81	5	74	195	96	210	4.78e-04	37.4
tr|P72628|P72628_SYNY3	WP_138071335.1	23.077	143	99	5	74	214	141	274	0.007	33.5
tr|P72628|P72628_SYNY3	WP_138073198.1	25.714	175	106	8	16	173	1	168	0.012	33.1
tr|P72628|P72628_SYNY3	WP_138072507.1	19.469	113	76	4	74	181	42	144	0.025	32.0
tr|P72628|P72628_SYNY3	WP_030007827.1	24.832	149	89	6	16	151	1	139	0.033	31.2
tr|P72628|P72628_SYNY3	WP_138072685.1	26.126	111	77	2	41	151	61	166	0.036	31.2
tr|P72628|P72628_SYNY3	WP_138073463.1	21.970	132	74	7	57	175	48	163	0.18	29.3
tr|P72628|P72628_SYNY3	WP_138073490.1	24.299	107	74	4	74	179	40	140	0.27	28.5
tr|P72628|P72628_SYNY3	WP_065711043.1	31.481	54	28	1	19	63	402	455	0.66	27.7
slr1140	P73264	DegT/DnrJ/EryC1/StrS family protein			Other	Other Categories	Soluble proteins	0.900410686	41.5	0.0
BLAST Output	PCC 11901 Accession	Percentage Identity	Alignment Length	Mismatches	Gap Open	Synechocystis sp. PCC 6803 Start	Synechocystis sp. PCC 6803 End	PCC 11901 Start	PCC 11901 End	E-value	Bit Score
tr|P73264|P73264_SYNY3	WP_138073532.1	26.923	364	233	13	26	376	26	369	3.16e-21	90.5
tr|P73264|P73264_SYNY3	WP_138073538.1	25.850	147	93	6	30	169	778	915	0.082	31.6
slr1197	P73345	SMF protein		smf	Other	Other Categories	Soluble proteins	0.892746041	43.6	0.0
BLAST Output	PCC 11901 Accession	Percentage Identity	Alignment Length	Mismatches	Gap Open	Synechocystis sp. PCC 6803 Start	Synechocystis sp. PCC 6803 End	PCC 11901 Start	PCC 11901 End	E-value	Bit Score
sp|P73345|SMF_SYNY3	WP_181445673.1	53.435	393	169	3	5	397	2	380	8.45e-145	413
sp|P73345|SMF_SYNY3	WP_138072184.1	31.111	45	31	0	15	59	573	617	0.32	29.6
sp|P73345|SMF_SYNY3	WP_030007709.1	52.941	17	8	0	1	17	42	58	0.85	28.1
slr1205	P73355	similar to chlorobenzene dioxygenase, ferredoxin component			Other	Other Categories	Soluble proteins	0.684028929	12.5	0.0
BLAST Output	PCC 11901 Accession	Percentage Identity	Alignment Length	Mismatches	Gap Open	Synechocystis sp. PCC 6803 Start	Synechocystis sp. PCC 6803 End	PCC 11901 Start	PCC 11901 End	E-value	Bit Score
tr|P73355|P73355_SYNY3	WP_138073672.1	23.529	68	52	0	50	117	32	99	2.70e-04	36.6
tr|P73355|P73355_SYNY3	WP_138071650.1	44.444	27	15	0	90	116	65	91	0.002	33.9
tr|P73355|P73355_SYNY3	WP_138073887.1	27.027	74	49	3	61	130	73	145	0.076	28.9
tr|P73355|P73355_SYNY3	WP_138073093.1	28.916	83	55	2	42	121	2	83	0.098	29.3
tr|P73355|P73355_SYNY3	WP_138072110.1	29.310	58	39	1	66	121	56	113	0.50	26.9
slr1208	P73359	probable oxidoreductase			Other	Other Categories	Soluble proteins	0.892069605	71.5	0.0
BLAST Output	PCC 11901 Accession	Percentage Identity	Alignment Length	Mismatches	Gap Open	Synechocystis sp. PCC 6803 Start	Synechocystis sp. PCC 6803 End	PCC 11901 Start	PCC 11901 End	E-value	Bit Score
tr|P73359|P73359_SYNY3	WP_138071622.1	69.254	657	202	0	1	657	1	657	0.0	945
tr|P73359|P73359_SYNY3	WP_138071343.1	27.778	252	158	8	410	652	14	250	3.36e-16	75.5
tr|P73359|P73359_SYNY3	WP_138073537.1	24.731	186	123	4	412	584	4	185	2.59e-07	48.9
tr|P73359|P73359_SYNY3	WP_138072043.1	28.571	175	115	6	413	584	5	172	5.74e-04	38.5
tr|P73359|P73359_SYNY3	WP_138072337.1	25.926	189	123	8	412	584	3	190	0.009	34.7
tr|P73359|P73359_SYNY3	WP_012305942.1	25.137	183	123	6	410	584	4	180	0.015	34.3
tr|P73359|P73359_SYNY3	WP_012306990.1	33.333	63	22	5	377	425	176	232	0.26	30.4
tr|P73359|P73359_SYNY3	WP_138071301.1	33.929	56	32	1	413	463	4	59	0.28	30.4
tr|P73359|P73359_SYNY3	WP_138073408.1	47.059	34	18	0	407	440	1	34	0.37	30.0
tr|P73359|P73359_SYNY3	WP_138073393.1	37.500	48	29	1	335	381	6	53	0.38	28.9
tr|P73359|P73359_SYNY3	WP_012307288.1	24.060	266	165	9	407	652	4	252	0.72	28.9
slr1501	P72625	probable acetyltransferase		slr1501	Other	Other Categories	Soluble proteins	0.909467457	25.0	0.0
BLAST Output	PCC 11901 Accession	Percentage Identity	Alignment Length	Mismatches	Gap Open	Synechocystis sp. PCC 6803 Start	Synechocystis sp. PCC 6803 End	PCC 11901 Start	PCC 11901 End	E-value	Bit Score
tr|P72625|P72625_SYNY3	WP_138071806.1	36.842	57	36	0	141	197	87	143	1.45e-04	37.7
tr|P72625|P72625_SYNY3	WP_138072979.1	28.302	53	38	0	146	198	89	141	0.001	35.0
tr|P72625|P72625_SYNY3	WP_065710314.1	35.135	37	24	0	129	165	3	39	0.33	26.9
tr|P72625|P72625_SYNY3	WP_138073330.1	33.333	72	37	3	39	108	219	281	0.48	27.7
tr|P72625|P72625_SYNY3	WP_138073549.1	32.558	43	29	0	153	195	856	898	0.76	27.3
slr1610	P72888	putative C-3 methyl transferase		slr1610	Other	Other Categories	Soluble proteins	0.843382273	48.0	0.0
BLAST Output	PCC 11901 Accession	Percentage Identity	Alignment Length	Mismatches	Gap Open	Synechocystis sp. PCC 6803 Start	Synechocystis sp. PCC 6803 End	PCC 11901 Start	PCC 11901 End	E-value	Bit Score
slr1748	P73454	probable phosphoglycerate mutase		slr1748	Other	Other Categories	Soluble proteins	0.906300745	24.2	0.0
BLAST Output	PCC 11901 Accession	Percentage Identity	Alignment Length	Mismatches	Gap Open	Synechocystis sp. PCC 6803 Start	Synechocystis sp. PCC 6803 End	PCC 11901 Start	PCC 11901 End	E-value	Bit Score
tr|P73454|P73454_SYNY3	WP_138071571.1	26.754	228	142	8	1	213	1	218	3.08e-12	61.2
tr|P73454|P73454_SYNY3	WP_138071571.1	24.766	214	141	7	3	204	226	431	1.55e-11	59.3
tr|P73454|P73454_SYNY3	WP_138073094.1	26.437	174	113	5	4	168	14	181	2.99e-11	57.4
tr|P73454|P73454_SYNY3	WP_012308217.1	34.524	84	48	3	3	83	1	80	0.096	29.3
tr|P73454|P73454_SYNY3	WP_012307729.1	33.333	57	37	1	82	138	187	242	0.15	29.3
slr1763	P73040	probable methyltransferase			Other	Other Categories	Soluble proteins	0.768391506	45.3	0.0
BLAST Output	PCC 11901 Accession	Percentage Identity	Alignment Length	Mismatches	Gap Open	Synechocystis sp. PCC 6803 Start	Synechocystis sp. PCC 6803 End	PCC 11901 Start	PCC 11901 End	E-value	Bit Score
tr|P73040|P73040_SYNY3	WP_138072363.1	24.691	81	57	1	157	233	96	176	0.012	33.5
tr|P73040|P73040_SYNY3	WP_012307810.1	32.558	43	29	0	185	227	56	98	0.33	29.3
tr|P73040|P73040_SYNY3	WP_138073609.1	36.842	38	23	1	42	78	303	340	0.91	28.1
slr1772	P72765	probable hydrolase, periplasmic protein			Other	Other Categories	Soluble proteins	0.896984818	41.6	1.0
BLAST Output	PCC 11901 Accession	Percentage Identity	Alignment Length	Mismatches	Gap Open	Synechocystis sp. PCC 6803 Start	Synechocystis sp. PCC 6803 End	PCC 11901 Start	PCC 11901 End	E-value	Bit Score
tr|P72765|P72765_SYNY3	WP_138073559.1	25.000	68	49	1	167	232	48	115	0.84	28.1
slr1853	P73604	carboxymuconolactone decarboxylase		slr1853	Other	Other Categories	Soluble proteins	0.8896245	12.1	0.0
BLAST Output	PCC 11901 Accession	Percentage Identity	Alignment Length	Mismatches	Gap Open	Synechocystis sp. PCC 6803 Start	Synechocystis sp. PCC 6803 End	PCC 11901 Start	PCC 11901 End	E-value	Bit Score
slr1888	P73661	4-hydroxybutyrate coenzyme A transferase.			Other	Other Categories	Soluble proteins	0.925379307	70.9	0.0
BLAST Output	PCC 11901 Accession	Percentage Identity	Alignment Length	Mismatches	Gap Open	Synechocystis sp. PCC 6803 Start	Synechocystis sp. PCC 6803 End	PCC 11901 Start	PCC 11901 End	E-value	Bit Score
tr|P73661|P73661_SYNY3	WP_138073549.1	29.586	169	114	2	459	622	740	908	6.61e-21	94.0
tr|P73661|P73661_SYNY3	WP_138072202.1	41.667	36	20	1	462	497	155	189	0.25	30.0
slr2123	P73990	similar to D-3-phosphoglycerate dehydrogenase			Other	Other Categories	Soluble proteins	0.818405979	34.3	0.0
BLAST Output	PCC 11901 Accession	Percentage Identity	Alignment Length	Mismatches	Gap Open	Synechocystis sp. PCC 6803 Start	Synechocystis sp. PCC 6803 End	PCC 11901 Start	PCC 11901 End	E-value	Bit Score
tr|P73990|P73990_SYNY3	WP_012306867.1	36.538	260	158	5	43	299	34	289	3.08e-44	155
tr|P73990|P73990_SYNY3	WP_138073864.1	35.417	240	138	4	83	307	78	315	8.31e-41	142
tr|P73990|P73990_SYNY3	WP_012306898.1	34.247	73	44	2	145	216	15	84	0.003	35.0
tr|P73990|P73990_SYNY3	WP_012307864.1	40.000	30	18	0	151	180	22	51	0.015	32.7
tr|P73990|P73990_SYNY3	WP_138073303.1	30.952	84	47	3	70	147	232	310	0.16	30.0
slr5022	Q6ZEV8	probable aminotransferase			Other	Other Categories	Soluble proteins	0.864654806	41.9	0.0
BLAST Output	PCC 11901 Accession	Percentage Identity	Alignment Length	Mismatches	Gap Open	Synechocystis sp. PCC 6803 Start	Synechocystis sp. PCC 6803 End	PCC 11901 Start	PCC 11901 End	E-value	Bit Score
tr|Q6ZEV8|Q6ZEV8_SYNY3	WP_138072796.1	42.971	377	206	5	2	375	5	375	1.06e-97	293
tr|Q6ZEV8|Q6ZEV8_SYNY3	WP_138072935.1	36.870	377	220	8	2	368	3	371	2.54e-67	214
tr|Q6ZEV8|Q6ZEV8_SYNY3	WP_065716658.1	23.267	404	271	11	1	380	29	417	1.42e-20	89.4
tr|Q6ZEV8|Q6ZEV8_SYNY3	WP_138071295.1	21.925	187	134	4	37	218	52	231	1.64e-06	46.2
tr|Q6ZEV8|Q6ZEV8_SYNY3	WP_138072124.1	25.000	72	51	2	145	214	150	220	0.006	34.7
tr|Q6ZEV8|Q6ZEV8_SYNY3	WP_065711923.1	28.369	141	70	6	65	180	153	287	0.026	32.7
slr5088	Q6ZEP2	probable short-chain dehydrogenase			Other	Other Categories	Soluble proteins	0.910624702	26.2	0.0
BLAST Output	PCC 11901 Accession	Percentage Identity	Alignment Length	Mismatches	Gap Open	Synechocystis sp. PCC 6803 Start	Synechocystis sp. PCC 6803 End	PCC 11901 Start	PCC 11901 End	E-value	Bit Score
tr|Q6ZEP2|Q6ZEP2_SYNY3	WP_138072337.1	32.624	141	81	7	1	131	1	137	5.65e-09	51.6
tr|Q6ZEP2|Q6ZEP2_SYNY3	WP_138072043.1	27.568	185	120	6	4	185	5	178	3.40e-07	46.2
tr|Q6ZEP2|Q6ZEP2_SYNY3	WP_138071343.1	24.742	194	123	8	4	185	17	199	7.30e-07	45.4
tr|Q6ZEP2|Q6ZEP2_SYNY3	WP_138073537.1	20.400	250	162	8	4	238	5	232	0.002	35.0
tr|Q6ZEP2|Q6ZEP2_SYNY3	WP_138071622.1	24.848	165	104	6	4	160	413	565	0.067	30.8
tr|Q6ZEP2|Q6ZEP2_SYNY3	WP_065710775.1	50.000	22	8	1	76	97	260	278	0.46	28.1
tr|Q6ZEP2|Q6ZEP2_SYNY3	WP_138073703.1	30.000	70	46	1	54	120	165	234	0.68	27.3
slr7041	Q6ZEF7	probable growth inhibitor, PemK-like protein			Other	Other Categories	Soluble proteins	0.652198828	13.3	0.0
BLAST Output	PCC 11901 Accession	Percentage Identity	Alignment Length	Mismatches	Gap Open	Synechocystis sp. PCC 6803 Start	Synechocystis sp. PCC 6803 End	PCC 11901 Start	PCC 11901 End	E-value	Bit Score
tr|Q6ZEF7|Q6ZEF7_SYNY3	WP_181445700.1	38.679	106	61	4	11	116	9	110	3.48e-13	58.2
tr|Q6ZEF7|Q6ZEF7_SYNY3	WP_012305785.1	34.884	43	23	1	71	113	454	491	0.29	26.9
tr|Q6ZEF7|Q6ZEF7_SYNY3	WP_138073216.1	22.481	129	84	5	8	120	312	440	0.62	25.8
slr8015	Q6ZE77	plasmid partitioning protein, ParA family		parA	Other	Other Categories	Soluble proteins	0.761635313	21.5	0.0
BLAST Output	PCC 11901 Accession	Percentage Identity	Alignment Length	Mismatches	Gap Open	Synechocystis sp. PCC 6803 Start	Synechocystis sp. PCC 6803 End	PCC 11901 Start	PCC 11901 End	E-value	Bit Score
tr|Q6ZE77|Q6ZE77_SYNY3	WP_062436859.1	71.859	199	56	0	1	199	1	199	2.25e-109	308
tr|Q6ZE77|Q6ZE77_SYNY3	WP_012305478.1	49.231	195	95	2	3	197	2	192	5.32e-55	170
tr|Q6ZE77|Q6ZE77_SYNY3	WP_030008092.1	31.452	124	80	2	5	123	4	127	1.45e-11	57.8
tr|Q6ZE77|Q6ZE77_SYNY3	WP_012306948.1	26.738	187	122	6	3	178	5	187	9.24e-08	47.0
tr|Q6ZE77|Q6ZE77_SYNY3	WP_012306145.1	25.381	197	89	8	1	147	1	189	0.002	34.3
tr|Q6ZE77|Q6ZE77_SYNY3	WP_030007057.1	42.857	42	20	1	3	40	168	209	0.005	33.5
tr|Q6ZE77|Q6ZE77_SYNY3	WP_012307837.1	44.444	45	20	2	1	40	1	45	0.012	32.3
tr|Q6ZE77|Q6ZE77_SYNY3	WP_138071252.1	42.222	45	21	2	1	40	1	45	0.036	30.8
tr|Q6ZE77|Q6ZE77_SYNY3	WP_012306542.1	61.905	21	8	0	5	25	100	120	0.12	29.3
tr|Q6ZE77|Q6ZE77_SYNY3	WP_138073638.1	28.125	96	54	4	5	93	3	90	0.46	27.7
tr|Q6ZE77|Q6ZE77_SYNY3	WP_138071079.1	25.000	184	120	6	5	179	3	177	0.50	26.9
tr|Q6ZE77|Q6ZE77_SYNY3	WP_138070987.1	25.000	184	120	6	5	179	3	177	0.55	26.9
slr8016	Q6ZE76	plasmid partitioning protein, ParB		parB	Other	Other Categories	Soluble proteins	0.920980392	32.4	0.0
BLAST Output	PCC 11901 Accession	Percentage Identity	Alignment Length	Mismatches	Gap Open	Synechocystis sp. PCC 6803 Start	Synechocystis sp. PCC 6803 End	PCC 11901 Start	PCC 11901 End	E-value	Bit Score
tr|Q6ZE76|Q6ZE76_SYNY3	WP_138071124.1	55.172	261	109	2	1	258	1	256	4.72e-92	270
tr|Q6ZE76|Q6ZE76_SYNY3	WP_065717499.1	51.813	193	88	2	3	192	4	194	1.32e-56	179
tr|Q6ZE76|Q6ZE76_SYNY3	WP_138073794.1	32.558	43	29	0	87	129	3	45	0.27	29.3
tr|Q6ZE76|Q6ZE76_SYNY3	WP_065710064.1	27.103	107	69	5	35	136	33	135	0.75	27.3
slr8023	Q6ZE69	probable esterase			Other	Other Categories	Soluble proteins	0.757198301	48.0	0.0
BLAST Output	PCC 11901 Accession	Percentage Identity	Alignment Length	Mismatches	Gap Open	Synechocystis sp. PCC 6803 Start	Synechocystis sp. PCC 6803 End	PCC 11901 Start	PCC 11901 End	E-value	Bit Score
tr|Q6ZE69|Q6ZE69_SYNY3	WP_138073875.1	29.839	124	69	4	84	204	65	173	6.45e-09	53.5
ssl7004	Q6ZEJ4	probable plasmid stability protein			Other	Other Categories	Soluble proteins	0.886252029	8.7	0.0
BLAST Output	PCC 11901 Accession	Percentage Identity	Alignment Length	Mismatches	Gap Open	Synechocystis sp. PCC 6803 Start	Synechocystis sp. PCC 6803 End	PCC 11901 Start	PCC 11901 End	E-value	Bit Score
tr|Q6ZEJ4|Q6ZEJ4_SYNY3	WP_012305697.1	36.585	41	26	0	1	41	1	41	0.010	28.9
tr|Q6ZEJ4|Q6ZEJ4_SYNY3	WP_138072160.1	26.866	67	46	2	6	70	207	272	0.076	27.3
tr|Q6ZEJ4|Q6ZEJ4_SYNY3	WP_138072995.1	27.907	43	24	1	16	51	372	414	0.99	23.9
sll0264	P74403	probable dioxygenase Rieske iron-sulfur component			Other	Other Categories	TM	0.904766993	41.1	1.0
BLAST Output	PCC 11901 Accession	Percentage Identity	Alignment Length	Mismatches	Gap Open	Synechocystis sp. PCC 6803 Start	Synechocystis sp. PCC 6803 End	PCC 11901 Start	PCC 11901 End	E-value	Bit Score
tr|P74403|P74403_SYNY3	WP_138073672.1	35.484	124	70	3	57	171	32	154	2.35e-16	76.3
tr|P74403|P74403_SYNY3	WP_138071650.1	22.353	170	117	4	55	211	21	188	2.26e-07	48.9
tr|P74403|P74403_SYNY3	WP_041443896.1	50.000	24	10	1	348	371	31	52	0.18	28.1
sll1513	P72978	c-type cytochrome synthesis protein	ccsA, ycf5	ycf5, ccsA	Other	Other Categories	TM	0.951838076	36.1	8.0
BLAST Output	PCC 11901 Accession	Percentage Identity	Alignment Length	Mismatches	Gap Open	Synechocystis sp. PCC 6803 Start	Synechocystis sp. PCC 6803 End	PCC 11901 Start	PCC 11901 End	E-value	Bit Score
sp|P72978|CCSA_SYNY3	WP_012307531.1	69.412	340	96	3	1	334	1	338	3.99e-166	463
sp|P72978|CCSA_SYNY3	WP_138073485.1	34.783	46	27	1	254	299	32	74	0.49	28.5
sp|P72978|CCSA_SYNY3	WP_138073181.1	26.389	72	48	2	206	272	623	694	0.85	28.1
sll1534	P74348	probable glycosyltransferase		rfbZ	Other	Other Categories	TM	0.910856908	42.9	0.0
BLAST Output	PCC 11901 Accession	Percentage Identity	Alignment Length	Mismatches	Gap Open	Synechocystis sp. PCC 6803 Start	Synechocystis sp. PCC 6803 End	PCC 11901 Start	PCC 11901 End	E-value	Bit Score
tr|P74348|P74348_SYNY3	WP_138071414.1	66.223	376	120	2	2	377	3	371	0.0	526
tr|P74348|P74348_SYNY3	WP_138072361.1	22.927	205	143	5	141	336	153	351	1.05e-08	52.8
tr|P74348|P74348_SYNY3	WP_138073252.1	26.842	190	109	8	185	353	206	386	3.30e-07	48.1
tr|P74348|P74348_SYNY3	WP_138073302.1	31.496	127	74	7	187	300	210	336	6.64e-07	47.4
tr|P74348|P74348_SYNY3	WP_138071066.1	28.662	157	92	5	159	295	136	292	5.68e-06	44.3
tr|P74348|P74348_SYNY3	WP_065711271.1	24.752	202	117	8	155	333	131	320	1.10e-05	43.5
tr|P74348|P74348_SYNY3	WP_138071472.1	27.027	185	125	5	192	373	190	367	1.18e-05	43.1
tr|P74348|P74348_SYNY3	WP_138073253.1	29.268	164	91	9	189	333	183	340	5.27e-04	38.1
tr|P74348|P74348_SYNY3	WP_138072899.1	30.769	65	41	1	276	336	357	421	0.035	32.7
tr|P74348|P74348_SYNY3	WP_138073291.1	26.891	119	73	4	221	333	234	344	0.12	30.8
tr|P74348|P74348_SYNY3	WP_168191169.1	24.107	112	75	4	248	357	296	399	0.44	28.9
sll1664	P72806	probable glycosyl transferase			Other	Other Categories	TM	0.889697786	35.6	0.0
BLAST Output	PCC 11901 Accession	Percentage Identity	Alignment Length	Mismatches	Gap Open	Synechocystis sp. PCC 6803 Start	Synechocystis sp. PCC 6803 End	PCC 11901 Start	PCC 11901 End	E-value	Bit Score
tr|P72806|P72806_SYNY3	WP_030006148.1	72.903	310	83	1	1	309	2	311	4.19e-172	476
tr|P72806|P72806_SYNY3	WP_030008213.1	27.083	240	128	9	1	209	1	224	1.71e-11	60.5
tr|P72806|P72806_SYNY3	WP_138072774.1	34.737	95	59	2	3	96	4	96	2.64e-07	47.8
tr|P72806|P72806_SYNY3	WP_065711106.1	31.579	95	62	2	3	96	17	109	1.98e-06	45.1
tr|P72806|P72806_SYNY3	WP_138073297.1	29.032	93	56	3	4	95	6	89	1.03e-05	42.7
tr|P72806|P72806_SYNY3	WP_138073559.1	27.731	119	69	4	4	110	54	167	3.48e-05	41.6
tr|P72806|P72806_SYNY3	WP_138073299.1	26.178	191	123	7	3	191	6	180	8.63e-05	40.0
tr|P72806|P72806_SYNY3	WP_138073293.1	25.806	93	60	3	4	95	25	109	1.56e-04	39.3
tr|P72806|P72806_SYNY3	WP_138073805.1	26.804	97	65	2	3	98	5	96	2.89e-04	38.5
tr|P72806|P72806_SYNY3	WP_138073746.1	23.350	197	129	6	3	189	5	189	3.96e-04	38.1
tr|P72806|P72806_SYNY3	WP_012308045.1	23.364	107	74	3	1	105	1	101	0.002	35.8
tr|P72806|P72806_SYNY3	WP_138073292.1	28.571	105	69	3	2	105	4	103	0.002	35.8
tr|P72806|P72806_SYNY3	WP_138072519.1	23.077	104	74	2	4	104	109	209	0.015	33.1
tr|P72806|P72806_SYNY3	WP_071925405.1	28.704	108	65	3	7	114	1	96	0.11	30.0
tr|P72806|P72806_SYNY3	WP_012307407.1	32.000	50	26	1	208	257	17	58	0.17	28.5
sll5050	Q6ZET0	probable glycosyltransferase			Other	Other Categories	TM	0.811957325	48.9	1.0
BLAST Output	PCC 11901 Accession	Percentage Identity	Alignment Length	Mismatches	Gap Open	Synechocystis sp. PCC 6803 Start	Synechocystis sp. PCC 6803 End	PCC 11901 Start	PCC 11901 End	E-value	Bit Score
tr|Q6ZET0|Q6ZET0_SYNY3	WP_138073252.1	29.048	420	263	11	38	435	1	407	5.41e-39	142
tr|Q6ZET0|Q6ZET0_SYNY3	WP_138073291.1	35.032	157	95	3	261	416	210	360	3.82e-18	82.4
tr|Q6ZET0|Q6ZET0_SYNY3	WP_138073301.1	30.688	189	124	5	241	426	167	351	1.09e-13	68.6
tr|Q6ZET0|Q6ZET0_SYNY3	WP_138073253.1	28.351	194	131	5	208	396	150	340	1.90e-12	65.1
tr|Q6ZET0|Q6ZET0_SYNY3	WP_138071472.1	25.773	194	132	4	213	405	155	337	7.82e-12	62.8
tr|Q6ZET0|Q6ZET0_SYNY3	WP_138072361.1	23.474	213	131	7	210	398	146	350	1.19e-11	62.4
tr|Q6ZET0|Q6ZET0_SYNY3	WP_138073302.1	27.632	152	106	1	268	419	235	382	4.67e-11	60.5
tr|Q6ZET0|Q6ZET0_SYNY3	WP_138073290.1	34.711	121	75	3	266	383	197	316	3.61e-10	57.8
tr|Q6ZET0|Q6ZET0_SYNY3	WP_138071066.1	24.138	203	146	5	204	402	130	328	7.44e-10	56.6
tr|Q6ZET0|Q6ZET0_SYNY3	WP_065710775.1	27.411	197	128	6	197	380	136	330	1.98e-09	55.5
tr|Q6ZET0|Q6ZET0_SYNY3	WP_138071414.1	33.600	125	72	4	263	387	206	319	2.38e-07	48.9
tr|Q6ZET0|Q6ZET0_SYNY3	WP_138073806.1	28.455	123	85	2	245	365	194	315	2.79e-07	48.9
tr|Q6ZET0|Q6ZET0_SYNY3	WP_030005953.1	27.717	184	117	5	266	441	203	378	3.01e-07	48.5
tr|Q6ZET0|Q6ZET0_SYNY3	WP_065711271.1	23.494	166	121	5	236	398	160	322	5.37e-05	41.6
tr|Q6ZET0|Q6ZET0_SYNY3	WP_138073535.1	23.529	170	122	4	235	399	200	366	0.002	36.2
tr|Q6ZET0|Q6ZET0_SYNY3	WP_138072899.1	23.270	159	106	4	257	399	253	411	0.012	34.3
tr|Q6ZET0|Q6ZET0_SYNY3	WP_138071062.1	22.069	145	100	5	262	400	258	395	0.020	33.5
tr|Q6ZET0|Q6ZET0_SYNY3	WP_138072367.1	30.208	96	58	4	277	364	268	362	0.59	28.9
slr0309	Q55914	probable methyltransferase			Other	Other Categories	TM	0.789049848	54.4	0.0
BLAST Output	PCC 11901 Accession	Percentage Identity	Alignment Length	Mismatches	Gap Open	Synechocystis sp. PCC 6803 Start	Synechocystis sp. PCC 6803 End	PCC 11901 Start	PCC 11901 End	E-value	Bit Score
sp|Q55914|Y309_SYNY3	WP_012305961.1	28.032	371	242	9	33	386	29	391	4.35e-37	139
sp|Q55914|Y309_SYNY3	WP_138072909.1	23.361	244	136	10	78	283	124	354	1.35e-06	47.0
sp|Q55914|Y309_SYNY3	WP_065710156.1	23.316	193	130	5	68	248	42	228	1.79e-05	43.5
sp|Q55914|Y309_SYNY3	WP_138071426.1	25.455	165	63	8	99	210	153	310	0.008	35.0
sp|Q55914|Y309_SYNY3	WP_138073200.1	20.625	160	82	5	87	202	97	255	0.10	31.6
sp|Q55914|Y309_SYNY3	WP_138071077.1	27.711	83	54	3	78	158	178	256	0.13	31.2
sp|Q55914|Y309_SYNY3	WP_138070980.1	27.711	83	54	3	78	158	178	256	0.14	31.2
sp|Q55914|Y309_SYNY3	WP_181445679.1	35.385	65	37	2	302	366	222	281	0.51	28.9
slr1065	P72901	probable glycosyltransferase			Other	Other Categories	TM	0.830041278	37.7	0.0
BLAST Output	PCC 11901 Accession	Percentage Identity	Alignment Length	Mismatches	Gap Open	Synechocystis sp. PCC 6803 Start	Synechocystis sp. PCC 6803 End	PCC 11901 Start	PCC 11901 End	E-value	Bit Score
tr|P72901|P72901_SYNY3	WP_138073293.1	41.589	214	121	3	42	253	21	232	1.72e-50	168
tr|P72901|P72901_SYNY3	WP_138073297.1	35.955	89	56	1	43	131	3	90	1.11e-11	61.6
tr|P72901|P72901_SYNY3	WP_065711106.1	28.205	117	77	4	45	155	17	132	1.36e-07	48.9
tr|P72901|P72901_SYNY3	WP_071925405.1	34.568	81	48	2	50	130	2	77	1.94e-06	44.7
tr|P72901|P72901_SYNY3	WP_030006148.1	28.723	94	59	3	45	130	4	97	3.34e-04	38.5
tr|P72901|P72901_SYNY3	WP_138073805.1	25.490	102	70	3	45	142	5	104	0.004	35.0
tr|P72901|P72901_SYNY3	WP_138073559.1	25.806	124	71	3	45	153	53	170	0.009	34.3
tr|P72901|P72901_SYNY3	WP_012308045.1	26.415	106	66	4	44	142	2	102	0.018	33.1
tr|P72901|P72901_SYNY3	WP_030008213.1	47.222	36	19	0	44	79	2	37	0.37	28.9
tr|P72901|P72901_SYNY3	WP_138072456.1	24.348	115	77	2	183	293	373	481	0.56	28.5
tr|P72901|P72901_SYNY3	WP_138073155.1	23.457	81	48	2	144	210	1009	1089	0.88	28.1
slr1076	P72911	probable glycosyltransferase			Other	Other Categories	TM	0.888027999	43.3	0.0
BLAST Output	PCC 11901 Accession	Percentage Identity	Alignment Length	Mismatches	Gap Open	Synechocystis sp. PCC 6803 Start	Synechocystis sp. PCC 6803 End	PCC 11901 Start	PCC 11901 End	E-value	Bit Score
tr|P72911|P72911_SYNY3	WP_138073302.1	25.430	291	199	9	59	341	88	368	1.28e-16	77.4
tr|P72911|P72911_SYNY3	WP_138071066.1	26.275	255	152	8	132	375	129	358	1.54e-15	73.6
tr|P72911|P72911_SYNY3	WP_065710775.1	25.123	203	146	4	140	340	152	350	9.67e-14	68.6
tr|P72911|P72911_SYNY3	WP_138073252.1	25.292	257	169	5	98	342	130	375	2.62e-11	61.2
tr|P72911|P72911_SYNY3	WP_138073806.1	26.733	202	135	6	184	381	196	388	5.31e-11	60.1
tr|P72911|P72911_SYNY3	WP_065711271.1	29.412	136	86	3	211	338	189	322	5.75e-11	59.7
tr|P72911|P72911_SYNY3	WP_138071472.1	28.571	168	108	4	173	339	175	331	2.34e-10	58.2
tr|P72911|P72911_SYNY3	WP_138073291.1	24.691	162	116	3	199	358	211	368	2.93e-09	54.7
tr|P72911|P72911_SYNY3	WP_138071062.1	25.346	217	134	7	135	339	194	394	3.39e-09	54.7
tr|P72911|P72911_SYNY3	WP_168191169.1	25.510	196	123	6	140	331	193	369	8.25e-09	53.1
tr|P72911|P72911_SYNY3	WP_138073253.1	24.186	215	142	5	136	346	149	346	6.90e-08	50.4
tr|P72911|P72911_SYNY3	WP_138072899.1	32.632	95	60	1	249	339	317	411	1.01e-07	50.1
tr|P72911|P72911_SYNY3	WP_138071414.1	32.520	123	69	6	200	322	206	314	1.02e-07	49.7
tr|P72911|P72911_SYNY3	WP_030005953.1	25.311	241	159	9	136	374	142	363	1.06e-07	49.7
tr|P72911|P72911_SYNY3	WP_138073301.1	24.793	121	89	2	212	331	197	316	1.89e-07	48.9
tr|P72911|P72911_SYNY3	WP_138073535.1	23.684	152	104	5	195	341	224	368	3.03e-04	38.9
tr|P72911|P72911_SYNY3	WP_138072100.1	24.731	186	115	8	137	303	134	313	0.094	31.2
tr|P72911|P72911_SYNY3	WP_030007336.1	28.235	85	41	4	262	337	176	249	0.76	28.1
tr|P72911|P72911_SYNY3	WP_030008132.1	37.209	43	27	0	273	315	345	387	0.90	28.1
slr1077	P72912	probable glycosyltransferase		gumH	Other	Other Categories	TM	0.918492282	43.5	0.0
BLAST Output	PCC 11901 Accession	Percentage Identity	Alignment Length	Mismatches	Gap Open	Synechocystis sp. PCC 6803 Start	Synechocystis sp. PCC 6803 End	PCC 11901 Start	PCC 11901 End	E-value	Bit Score
tr|P72912|P72912_SYNY3	WP_138073806.1	29.353	402	260	8	1	384	1	396	8.42e-47	161
tr|P72912|P72912_SYNY3	WP_138071066.1	27.933	179	120	5	202	374	187	362	9.41e-13	65.5
tr|P72912|P72912_SYNY3	WP_030005953.1	26.230	244	142	13	79	304	76	299	1.35e-10	58.9
tr|P72912|P72912_SYNY3	WP_138071062.1	24.044	183	127	5	198	374	255	431	2.99e-09	54.7
tr|P72912|P72912_SYNY3	WP_065711271.1	21.586	227	173	5	148	371	133	357	7.56e-09	53.1
tr|P72912|P72912_SYNY3	WP_138072899.1	24.623	199	130	6	197	376	254	451	2.16e-07	49.3
tr|P72912|P72912_SYNY3	WP_168191169.1	27.586	116	75	3	189	304	239	345	7.28e-07	47.4
tr|P72912|P72912_SYNY3	WP_138073301.1	29.204	113	69	4	200	307	186	292	2.01e-05	42.7
tr|P72912|P72912_SYNY3	WP_138072361.1	28.889	135	83	6	172	304	194	317	2.79e-04	38.9
tr|P72912|P72912_SYNY3	WP_138073535.1	27.586	116	72	3	193	302	221	330	4.32e-04	38.5
tr|P72912|P72912_SYNY3	WP_138073302.1	25.946	185	124	7	179	355	205	384	5.89e-04	38.1
tr|P72912|P72912_SYNY3	WP_138073252.1	31.092	119	66	4	202	308	230	344	0.001	37.0
tr|P72912|P72912_SYNY3	WP_138073295.1	24.294	177	125	5	199	371	190	361	0.002	36.2
tr|P72912|P72912_SYNY3	WP_138071472.1	22.807	285	187	11	109	376	103	371	0.004	35.4
tr|P72912|P72912_SYNY3	WP_030008132.1	21.495	107	76	4	204	306	278	380	0.007	34.7
tr|P72912|P72912_SYNY3	WP_065710775.1	23.585	106	75	3	275	376	286	389	0.025	32.7
tr|P72912|P72912_SYNY3	WP_138073212.1	31.034	58	38	1	236	291	554	611	0.061	32.0
tr|P72912|P72912_SYNY3	WP_138071414.1	20.800	125	86	3	180	303	184	296	0.093	31.2
tr|P72912|P72912_SYNY3	WP_062435226.1	22.314	121	71	5	271	373	373	488	0.48	28.9
slr1106	P72754	prohibitin		phb, slr1106	Other	Other Categories	TM	0.877452287	30.6	1.0
BLAST Output	PCC 11901 Accession	Percentage Identity	Alignment Length	Mismatches	Gap Open	Synechocystis sp. PCC 6803 Start	Synechocystis sp. PCC 6803 End	PCC 11901 Start	PCC 11901 End	E-value	Bit Score
tr|P72754|P72754_SYNY3	WP_012308201.1	82.264	265	45	1	16	280	16	278	2.11e-152	424
tr|P72754|P72754_SYNY3	WP_012308290.1	24.324	222	151	9	27	245	17	224	2.33e-08	50.8
sll0506	Q55482	undecaprenyl pyrophosphate synthetase			Other	Other Categories	Unknown	0.494841304	28.8	0.0
BLAST Output	PCC 11901 Accession	Percentage Identity	Alignment Length	Mismatches	Gap Open	Synechocystis sp. PCC 6803 Start	Synechocystis sp. PCC 6803 End	PCC 11901 Start	PCC 11901 End	E-value	Bit Score
sp|Q55482|ISPT_SYNY3	WP_030006747.1	65.984	244	83	0	6	249	4	247	3.95e-124	349
sll0816	P74041	probable oxidoreductase			Other	Other Categories	Unknown	0.413697579	41.5	0.0
BLAST Output	PCC 11901 Accession	Percentage Identity	Alignment Length	Mismatches	Gap Open	Synechocystis sp. PCC 6803 Start	Synechocystis sp. PCC 6803 End	PCC 11901 Start	PCC 11901 End	E-value	Bit Score
sp|P74041|Y816_SYNY3	WP_138072252.1	59.893	374	140	1	6	369	5	378	1.15e-166	468
sp|P74041|Y816_SYNY3	WP_012306070.1	26.984	252	155	9	1	252	8	230	2.44e-13	67.0
sp|P74041|Y816_SYNY3	WP_138072387.1	25.847	236	132	9	66	294	58	257	1.30e-07	49.3
sp|P74041|Y816_SYNY3	WP_138071282.1	24.324	111	83	1	9	119	6	115	3.79e-05	41.6
sll0990	P73138	glutathione-dependent formaldehyde dehydrogenase			Other	Other Categories	Unknown	0.463894734	39.2	0.0
BLAST Output	PCC 11901 Accession	Percentage Identity	Alignment Length	Mismatches	Gap Open	Synechocystis sp. PCC 6803 Start	Synechocystis sp. PCC 6803 End	PCC 11901 Start	PCC 11901 End	E-value	Bit Score
sp|P73138|FRMA_SYNY3	WP_138072875.1	60.163	369	147	0	1	369	1	369	1.69e-155	439
sp|P73138|FRMA_SYNY3	WP_181445668.1	24.523	367	230	13	8	367	6	332	1.55e-14	70.5
sp|P73138|FRMA_SYNY3	WP_138073641.1	28.261	276	135	13	1	265	1	224	1.74e-11	61.2
sp|P73138|FRMA_SYNY3	WP_138073593.1	37.838	37	23	0	180	216	369	405	0.97	27.7
sll1108	P74709	stationary-phase survival protein SurE homolog		surE	Other	Other Categories	Unknown	0.612036624	30.4	0.0
BLAST Output	PCC 11901 Accession	Percentage Identity	Alignment Length	Mismatches	Gap Open	Synechocystis sp. PCC 6803 Start	Synechocystis sp. PCC 6803 End	PCC 11901 Start	PCC 11901 End	E-value	Bit Score
sp|P74709|SURE_SYNY3	WP_138072460.1	62.182	275	97	2	1	268	1	275	3.05e-125	354
sp|P74709|SURE_SYNY3	WP_065710656.1	29.858	211	133	5	7	214	1	199	4.22e-24	94.0
sp|P74709|SURE_SYNY3	WP_138072200.1	31.944	72	38	2	26	87	476	546	0.87	27.3
sll1253	P74081	similar to polyA polymerase		pcnB	Other	Other Categories	Unknown	0.683129625	105.8	0.0
BLAST Output	PCC 11901 Accession	Percentage Identity	Alignment Length	Mismatches	Gap Open	Synechocystis sp. PCC 6803 Start	Synechocystis sp. PCC 6803 End	PCC 11901 Start	PCC 11901 End	E-value	Bit Score
sp|P74081|AATNT_SYNY3	WP_138073190.1	56.930	938	365	7	1	938	1	899	0.0	1023
sp|P74081|AATNT_SYNY3	WP_168191146.1	24.828	435	257	16	514	935	30	407	7.13e-14	71.2
sp|P74081|AATNT_SYNY3	WP_138072560.1	31.343	134	87	3	324	457	442	570	3.43e-10	60.5
sp|P74081|AATNT_SYNY3	WP_030006122.1	27.211	147	76	3	333	449	7	152	1.06e-07	48.9
sp|P74081|AATNT_SYNY3	WP_138071818.1	29.412	136	75	5	326	445	73	203	4.90e-06	46.6
sp|P74081|AATNT_SYNY3	WP_138071818.1	31.818	88	56	3	365	448	50	137	0.27	31.2
sp|P74081|AATNT_SYNY3	WP_012305907.1	37.349	83	47	2	363	444	177	255	3.21e-05	43.9
sp|P74081|AATNT_SYNY3	WP_012305907.1	30.612	49	34	0	333	381	206	254	0.15	32.0
sp|P74081|AATNT_SYNY3	WP_138071997.1	32.184	87	49	4	557	638	523	604	0.040	34.3
sp|P74081|AATNT_SYNY3	WP_138071698.1	26.582	79	49	1	678	747	245	323	0.075	33.1
sp|P74081|AATNT_SYNY3	WP_045442698.1	24.194	62	47	0	27	88	143	204	0.097	32.3
sp|P74081|AATNT_SYNY3	WP_138073400.1	24.627	134	81	6	639	761	404	528	0.39	30.8
sll1284	P73192	esterase			Other	Other Categories	Unknown	0.610701673	22.2	0.0
BLAST Output	PCC 11901 Accession	Percentage Identity	Alignment Length	Mismatches	Gap Open	Synechocystis sp. PCC 6803 Start	Synechocystis sp. PCC 6803 End	PCC 11901 Start	PCC 11901 End	E-value	Bit Score
tr|P73192|P73192_SYNY3	WP_138071547.1	55.319	188	84	0	17	204	16	203	2.13e-69	207
tr|P73192|P73192_SYNY3	WP_168191132.1	26.277	137	65	4	67	168	96	231	0.002	34.7
tr|P73192|P73192_SYNY3	WP_065716323.1	21.910	178	125	5	19	188	51	222	0.005	33.5
sll1297	P73170	probable dioxygenase, Rieske iron-sulfur component		pobA	Other	Other Categories	Unknown	0.504174552	39.2	0.0
BLAST Output	PCC 11901 Accession	Percentage Identity	Alignment Length	Mismatches	Gap Open	Synechocystis sp. PCC 6803 Start	Synechocystis sp. PCC 6803 End	PCC 11901 Start	PCC 11901 End	E-value	Bit Score
tr|P73170|P73170_SYNY3	WP_138073672.1	31.818	198	118	8	5	191	29	220	6.04e-19	83.2
tr|P73170|P73170_SYNY3	WP_138071650.1	27.879	165	110	5	8	163	23	187	2.02e-10	58.2
tr|P73170|P73170_SYNY3	WP_138073279.1	31.765	85	56	1	2	86	1	83	0.027	31.2
tr|P73170|P73170_SYNY3	WP_138071945.1	50.000	20	10	0	75	94	171	190	0.38	28.5
tr|P73170|P73170_SYNY3	WP_138073146.1	34.286	35	23	0	53	87	363	397	0.49	28.5
tr|P73170|P73170_SYNY3	WP_138073887.1	31.081	74	41	4	19	86	73	142	0.89	27.3
sll1407	P72601	probable methyltransferase		sll1407	Other	Other Categories	Unknown	0.613586624	30.7	0.0
BLAST Output	PCC 11901 Accession	Percentage Identity	Alignment Length	Mismatches	Gap Open	Synechocystis sp. PCC 6803 Start	Synechocystis sp. PCC 6803 End	PCC 11901 Start	PCC 11901 End	E-value	Bit Score
tr|P72601|P72601_SYNY3	WP_138071792.1	34.677	124	69	4	29	143	75	195	1.16e-11	60.5
tr|P72601|P72601_SYNY3	WP_138072814.1	31.731	104	62	4	40	136	43	144	1.61e-09	53.1
tr|P72601|P72601_SYNY3	WP_138072827.1	31.724	145	85	6	2	139	8	145	4.66e-09	51.6
tr|P72601|P72601_SYNY3	WP_138073463.1	25.767	163	103	4	27	173	49	209	2.75e-07	47.0
tr|P72601|P72601_SYNY3	WP_030006221.1	32.877	73	47	1	65	135	76	148	2.79e-06	43.9
tr|P72601|P72601_SYNY3	WP_138073079.1	29.348	92	59	2	49	138	54	141	1.04e-05	42.0
tr|P72601|P72601_SYNY3	WP_138073460.1	27.206	136	77	5	19	136	117	248	1.85e-05	41.6
tr|P72601|P72601_SYNY3	WP_138073490.1	29.213	89	63	0	48	136	46	134	2.65e-04	38.1
tr|P72601|P72601_SYNY3	WP_138071496.1	31.304	115	74	4	35	147	29	140	0.001	35.8
tr|P72601|P72601_SYNY3	WP_138073322.1	22.222	126	93	3	19	139	49	174	0.002	35.4
tr|P72601|P72601_SYNY3	WP_138071335.1	24.138	174	104	7	49	208	148	307	0.004	34.3
tr|P72601|P72601_SYNY3	WP_138071341.1	32.727	55	36	1	16	70	18	71	0.060	30.4
tr|P72601|P72601_SYNY3	WP_045441624.1	31.111	45	31	0	111	155	349	393	0.087	30.4
tr|P72601|P72601_SYNY3	WP_138072363.1	25.000	108	68	5	65	170	60	156	0.096	30.0
tr|P72601|P72601_SYNY3	WP_138073508.1	25.532	94	56	3	98	184	78	164	1.00	26.9
sll1647	P73034	probable phosphinothricin N-acetyltransferase			Other	Other Categories	Unknown	0.522402462	19.6	0.0
BLAST Output	PCC 11901 Accession	Percentage Identity	Alignment Length	Mismatches	Gap Open	Synechocystis sp. PCC 6803 Start	Synechocystis sp. PCC 6803 End	PCC 11901 Start	PCC 11901 End	E-value	Bit Score
tr|P73034|P73034_SYNY3	WP_138072979.1	26.316	95	69	1	57	150	52	146	3.73e-04	35.8
tr|P73034|P73034_SYNY3	WP_138071806.1	21.918	73	56	1	72	143	70	142	0.56	26.6
sll5036	Q6ZEU4	sulfide-quinone reductase			Other	Other Categories	Unknown	0.396032778	46.8	0.0
BLAST Output	PCC 11901 Accession	Percentage Identity	Alignment Length	Mismatches	Gap Open	Synechocystis sp. PCC 6803 Start	Synechocystis sp. PCC 6803 End	PCC 11901 Start	PCC 11901 End	E-value	Bit Score
tr|Q6ZEU4|Q6ZEU4_SYNY3	WP_138073886.1	51.537	423	197	4	1	416	1	422	2.25e-149	427
tr|Q6ZEU4|Q6ZEU4_SYNY3	WP_138073605.1	24.699	332	210	13	4	320	6	312	3.28e-09	54.7
tr|Q6ZEU4|Q6ZEU4_SYNY3	WP_138073704.1	26.263	396	215	20	3	345	17	388	0.007	35.0
tr|Q6ZEU4|Q6ZEU4_SYNY3	WP_065710726.1	40.000	40	20	1	381	416	50	89	0.38	28.5
sll5042	Q6ZET8	probable sulfotransferase			Other	Other Categories	Unknown	0.563869229	32.9	0.0
BLAST Output	PCC 11901 Accession	Percentage Identity	Alignment Length	Mismatches	Gap Open	Synechocystis sp. PCC 6803 Start	Synechocystis sp. PCC 6803 End	PCC 11901 Start	PCC 11901 End	E-value	Bit Score
tr|Q6ZET8|Q6ZET8_SYNY3	WP_138073101.1	22.581	93	63	2	79	168	2264	2350	0.32	28.9
tr|Q6ZET8|Q6ZET8_SYNY3	WP_156785477.1	27.500	40	29	0	96	135	8	47	0.63	25.4
tr|Q6ZET8|Q6ZET8_SYNY3	WP_065710927.1	25.581	86	50	3	139	212	51	134	0.75	27.3
sll5048	Q6ZET2	probable glycosyltransferase			Other	Other Categories	Unknown	0.711440719	39.9	0.0
BLAST Output	PCC 11901 Accession	Percentage Identity	Alignment Length	Mismatches	Gap Open	Synechocystis sp. PCC 6803 Start	Synechocystis sp. PCC 6803 End	PCC 11901 Start	PCC 11901 End	E-value	Bit Score
tr|Q6ZET2|Q6ZET2_SYNY3	WP_065711271.1	35.714	112	70	2	230	341	237	346	5.57e-13	65.9
tr|Q6ZET2|Q6ZET2_SYNY3	WP_138071066.1	36.036	111	69	2	231	341	240	348	9.68e-12	62.0
tr|Q6ZET2|Q6ZET2_SYNY3	WP_138071472.1	32.673	101	63	2	259	354	272	372	4.95e-09	53.9
tr|Q6ZET2|Q6ZET2_SYNY3	WP_138071062.1	30.657	137	80	5	195	325	275	402	9.17e-09	53.1
tr|Q6ZET2|Q6ZET2_SYNY3	WP_030005953.1	22.845	232	166	8	143	362	148	378	2.75e-08	51.6
tr|Q6ZET2|Q6ZET2_SYNY3	WP_138073253.1	24.479	192	128	4	144	320	157	346	4.58e-08	50.8
tr|Q6ZET2|Q6ZET2_SYNY3	WP_138072899.1	30.909	110	69	5	237	340	326	434	1.78e-07	49.3
tr|Q6ZET2|Q6ZET2_SYNY3	WP_065710775.1	25.758	132	95	3	230	359	261	391	2.42e-06	45.4
tr|Q6ZET2|Q6ZET2_SYNY3	WP_138073301.1	24.277	173	122	5	157	320	155	327	3.07e-06	45.1
tr|Q6ZET2|Q6ZET2_SYNY3	WP_138071414.1	33.333	75	48	2	246	319	260	333	1.38e-05	43.1
tr|Q6ZET2|Q6ZET2_SYNY3	WP_138073302.1	31.532	111	69	4	240	348	293	398	1.51e-05	42.7
tr|Q6ZET2|Q6ZET2_SYNY3	WP_030007336.1	41.304	46	27	0	251	296	192	237	6.31e-05	40.8
tr|Q6ZET2|Q6ZET2_SYNY3	WP_138073291.1	29.630	108	63	4	198	296	222	325	3.33e-04	38.5
tr|Q6ZET2|Q6ZET2_SYNY3	WP_138073252.1	40.000	55	30	2	268	319	320	374	6.90e-04	37.7
tr|Q6ZET2|Q6ZET2_SYNY3	WP_138073290.1	24.561	114	77	3	233	338	246	358	8.32e-04	37.4
tr|Q6ZET2|Q6ZET2_SYNY3	WP_138072361.1	27.536	138	94	5	198	331	229	364	0.002	36.6
tr|Q6ZET2|Q6ZET2_SYNY3	WP_168191169.1	25.263	95	67	3	243	336	304	395	0.009	34.3
tr|Q6ZET2|Q6ZET2_SYNY3	WP_138073535.1	28.947	76	53	1	242	316	290	365	0.018	33.1
tr|Q6ZET2|Q6ZET2_SYNY3	WP_138073806.1	23.448	145	101	4	185	320	208	351	0.10	30.8
sll5079	Q6ZEQ1	probable short chain dehydrogenase			Other	Other Categories	Unknown	0.583814218	28.7	0.0
BLAST Output	PCC 11901 Accession	Percentage Identity	Alignment Length	Mismatches	Gap Open	Synechocystis sp. PCC 6803 Start	Synechocystis sp. PCC 6803 End	PCC 11901 Start	PCC 11901 End	E-value	Bit Score
tr|Q6ZEQ1|Q6ZEQ1_SYNY3	WP_138071343.1	40.562	249	140	3	25	271	9	251	2.55e-53	170
tr|Q6ZEQ1|Q6ZEQ1_SYNY3	WP_012305942.1	28.514	249	164	5	27	272	1	238	3.09e-28	105
tr|Q6ZEQ1|Q6ZEQ1_SYNY3	WP_012307288.1	30.556	252	164	6	27	270	4	252	1.03e-24	96.3
tr|Q6ZEQ1|Q6ZEQ1_SYNY3	WP_138072043.1	29.843	191	108	6	33	214	5	178	5.38e-15	68.9
tr|Q6ZEQ1|Q6ZEQ1_SYNY3	WP_138071622.1	27.885	208	128	7	29	227	409	603	6.08e-15	70.9
tr|Q6ZEQ1|Q6ZEQ1_SYNY3	WP_138073537.1	25.134	187	135	3	32	213	4	190	2.05e-11	59.3
tr|Q6ZEQ1|Q6ZEQ1_SYNY3	WP_138073277.1	26.087	207	131	7	29	217	13	215	2.00e-09	53.9
tr|Q6ZEQ1|Q6ZEQ1_SYNY3	WP_138072164.1	30.337	89	61	1	30	118	6	93	3.12e-04	38.1
tr|Q6ZEQ1|Q6ZEQ1_SYNY3	WP_138071644.1	32.353	34	23	0	144	177	1	34	0.17	29.3
tr|Q6ZEQ1|Q6ZEQ1_SYNY3	WP_138072402.1	29.008	131	72	5	60	177	451	573	0.51	28.1
sll6036	Q6YRW8	chromosome partitioning protein, ParA family		parA	Other	Other Categories	Unknown	0.549707598	21.7	0.0
BLAST Output	PCC 11901 Accession	Percentage Identity	Alignment Length	Mismatches	Gap Open	Synechocystis sp. PCC 6803 Start	Synechocystis sp. PCC 6803 End	PCC 11901 Start	PCC 11901 End	E-value	Bit Score
tr|Q6YRW8|Q6YRW8_SYNY3	WP_138070987.1	50.761	197	96	1	1	196	1	197	3.16e-72	214
tr|Q6YRW8|Q6YRW8_SYNY3	WP_138071079.1	50.254	197	97	1	1	196	1	197	3.28e-70	209
tr|Q6YRW8|Q6YRW8_SYNY3	WP_012306948.1	30.348	201	133	1	2	195	6	206	1.11e-24	93.2
tr|Q6YRW8|Q6YRW8_SYNY3	WP_030008092.1	27.053	207	124	8	2	189	3	201	9.42e-10	52.8
tr|Q6YRW8|Q6YRW8_SYNY3	WP_012305478.1	32.174	115	69	3	3	112	4	114	2.84e-07	45.4
tr|Q6YRW8|Q6YRW8_SYNY3	WP_030007057.1	31.280	211	106	12	2	192	169	360	1.57e-06	44.3
tr|Q6YRW8|Q6YRW8_SYNY3	WP_062436859.1	23.077	182	126	7	3	177	5	179	4.15e-05	39.3
tr|Q6YRW8|Q6YRW8_SYNY3	WP_012307837.1	46.667	45	22	1	1	43	3	47	3.45e-04	37.0
tr|Q6YRW8|Q6YRW8_SYNY3	WP_041443966.1	33.803	71	42	4	3	71	1	68	0.005	33.5
tr|Q6YRW8|Q6YRW8_SYNY3	WP_138071252.1	40.909	44	24	1	3	44	5	48	0.009	32.7
tr|Q6YRW8|Q6YRW8_SYNY3	WP_012306542.1	45.946	37	19	1	2	37	99	135	0.020	31.6
tr|Q6YRW8|Q6YRW8_SYNY3	WP_012306145.1	45.946	37	19	1	2	37	4	40	0.030	31.2
tr|Q6YRW8|Q6YRW8_SYNY3	WP_012306303.1	26.744	86	50	3	33	117	69	142	0.35	27.7
tr|Q6YRW8|Q6YRW8_SYNY3	WP_138073836.1	32.000	50	30	2	59	105	109	157	0.53	27.3
tr|Q6YRW8|Q6YRW8_SYNY3	WP_030006956.1	25.556	90	50	3	62	134	331	420	0.64	27.3
slr0078	Q55798	putative 6-pyruvoyl tetrahydrobiopterin synthase			Other	Other Categories	Unknown	0.425157077	14.5	0.0
BLAST Output	PCC 11901 Accession	Percentage Identity	Alignment Length	Mismatches	Gap Open	Synechocystis sp. PCC 6803 Start	Synechocystis sp. PCC 6803 End	PCC 11901 Start	PCC 11901 End	E-value	Bit Score
sp|Q55798|QUED_SYNY3	WP_012306089.1	59.664	119	48	0	2	120	4	122	2.15e-53	160
slr0541	Q55488	probable amidotransferase			Other	Other Categories	Unknown	0.683476643	25.7	0.0
BLAST Output	PCC 11901 Accession	Percentage Identity	Alignment Length	Mismatches	Gap Open	Synechocystis sp. PCC 6803 Start	Synechocystis sp. PCC 6803 End	PCC 11901 Start	PCC 11901 End	E-value	Bit Score
tr|Q55488|Q55488_SYNY3	WP_173867208.1	26.733	202	119	8	49	233	59	248	2.49e-05	41.2
tr|Q55488|Q55488_SYNY3	WP_138071529.1	45.238	42	17	1	74	109	67	108	7.43e-04	36.2
tr|Q55488|Q55488_SYNY3	WP_138071502.1	33.333	30	20	0	74	103	256	285	0.097	30.0
tr|Q55488|Q55488_SYNY3	WP_030007514.1	50.000	20	10	0	83	102	80	99	0.64	26.9
tr|Q55488|Q55488_SYNY3	WP_138073820.1	27.723	101	58	5	62	159	10	98	0.71	27.3
slr1063	P72899	probable glycosyltransferase			Other	Other Categories	Unknown	0.523549422	79.9	0.0
BLAST Output	PCC 11901 Accession	Percentage Identity	Alignment Length	Mismatches	Gap Open	Synechocystis sp. PCC 6803 Start	Synechocystis sp. PCC 6803 End	PCC 11901 Start	PCC 11901 End	E-value	Bit Score
tr|P72899|P72899_SYNY3	WP_138073805.1	24.107	336	192	13	9	309	5	312	1.93e-12	65.5
tr|P72899|P72899_SYNY3	WP_138073293.1	29.771	131	89	1	7	137	22	149	4.69e-10	58.2
tr|P72899|P72899_SYNY3	WP_138073297.1	36.170	94	56	1	7	100	3	92	1.50e-08	53.1
tr|P72899|P72899_SYNY3	WP_138072774.1	28.571	91	62	1	10	97	5	95	3.60e-05	42.7
tr|P72899|P72899_SYNY3	WP_065711106.1	25.279	269	168	9	9	271	17	258	6.35e-05	42.0
tr|P72899|P72899_SYNY3	WP_065711271.1	26.154	130	85	5	541	665	213	336	0.013	34.7
tr|P72899|P72899_SYNY3	WP_138071066.1	28.333	60	42	1	606	665	280	338	0.048	33.1
tr|P72899|P72899_SYNY3	WP_030006148.1	22.330	103	73	2	9	105	4	105	0.13	31.6
tr|P72899|P72899_SYNY3	WP_138073559.1	25.455	55	41	0	9	63	53	107	0.30	30.4
tr|P72899|P72899_SYNY3	WP_168191117.1	31.343	67	44	1	233	299	202	266	0.79	29.3
slr1085	P72922	probable glycosyltransferase			Other	Other Categories	Unknown	0.618991563	47.4	0.0
BLAST Output	PCC 11901 Accession	Percentage Identity	Alignment Length	Mismatches	Gap Open	Synechocystis sp. PCC 6803 Start	Synechocystis sp. PCC 6803 End	PCC 11901 Start	PCC 11901 End	E-value	Bit Score
tr|P72922|P72922_SYNY3	WP_138073283.1	51.629	399	193	0	1	399	31	429	1.50e-144	416
tr|P72922|P72922_SYNY3	WP_138073253.1	24.583	240	160	7	165	398	152	376	1.13e-07	50.1
tr|P72922|P72922_SYNY3	WP_138073290.1	22.449	196	138	7	220	409	188	375	0.005	35.0
tr|P72922|P72922_SYNY3	WP_138073806.1	25.166	151	95	5	250	392	235	375	0.010	34.3
tr|P72922|P72922_SYNY3	WP_168191169.1	25.714	70	41	3	339	399	342	409	0.26	29.6
tr|P72922|P72922_SYNY3	WP_138073536.1	27.907	86	55	2	300	380	63	146	0.71	28.5
slr1420	P74524	probable sugar kinase			Other	Other Categories	Unknown	0.654383678	46.3	0.0
BLAST Output	PCC 11901 Accession	Percentage Identity	Alignment Length	Mismatches	Gap Open	Synechocystis sp. PCC 6803 Start	Synechocystis sp. PCC 6803 End	PCC 11901 Start	PCC 11901 End	E-value	Bit Score
tr|P74524|P74524_SYNY3	WP_138072432.1	59.080	413	165	1	7	419	3	411	5.34e-165	467
tr|P74524|P74524_SYNY3	WP_030007700.1	22.449	441	290	16	8	404	5	437	3.02e-04	39.3
tr|P74524|P74524_SYNY3	WP_138072588.1	28.000	50	35	1	62	110	386	435	0.27	30.0
slr1521	P73965	GTP-binding protein		hflX	Other	Other Categories	Unknown	0.420355946	58.5	0.0
BLAST Output	PCC 11901 Accession	Percentage Identity	Alignment Length	Mismatches	Gap Open	Synechocystis sp. PCC 6803 Start	Synechocystis sp. PCC 6803 End	PCC 11901 Start	PCC 11901 End	E-value	Bit Score
tr|P73965|P73965_SYNY3	WP_181445693.1	67.878	523	163	2	2	524	38	555	0.0	660
tr|P73965|P73965_SYNY3	WP_030006721.1	31.548	168	92	6	329	489	99	250	2.36e-04	40.0
tr|P73965|P73965_SYNY3	WP_138073099.1	31.250	144	70	7	364	496	224	349	3.65e-04	39.3
tr|P73965|P73965_SYNY3	WP_012305762.1	26.190	168	97	7	363	514	178	334	0.002	37.4
tr|P73965|P73965_SYNY3	WP_012305762.1	40.909	44	21	2	361	401	3	44	0.73	28.9
tr|P73965|P73965_SYNY3	WP_062434581.1	44.186	43	23	1	366	407	6	48	0.014	34.3
tr|P73965|P73965_SYNY3	WP_138073575.1	23.077	182	106	7	325	493	43	203	0.017	34.3
tr|P73965|P73965_SYNY3	WP_030007130.1	29.630	135	78	6	364	494	23	144	0.030	33.1
tr|P73965|P73965_SYNY3	WP_138073274.1	27.072	181	92	7	364	532	41	193	0.043	32.3
tr|P73965|P73965_SYNY3	WP_138073307.1	47.222	36	19	0	364	399	162	197	0.057	32.3
tr|P73965|P73965_SYNY3	WP_138072718.1	40.000	45	21	1	364	402	34	78	0.079	31.6
tr|P73965|P73965_SYNY3	WP_138073360.1	33.333	51	33	1	347	397	5	54	0.084	32.0
tr|P73965|P73965_SYNY3	WP_138072760.1	24.818	137	89	5	358	494	467	589	0.47	29.6
slr1639	P74355	SsrA-binding protein		smpB	Other	Other Categories	Unknown	0.376863854	18.1	0.0
BLAST Output	PCC 11901 Accession	Percentage Identity	Alignment Length	Mismatches	Gap Open	Synechocystis sp. PCC 6803 Start	Synechocystis sp. PCC 6803 End	PCC 11901 Start	PCC 11901 End	E-value	Bit Score
sp|P74355|SSRP_SYNY3	WP_012306970.1	72.727	154	42	0	1	154	1	154	5.63e-84	240
sp|P74355|SSRP_SYNY3	WP_138073016.1	32.727	55	36	1	17	71	89	142	0.88	26.2
slr1761	P73037	FKBP-type peptidyl-prolyl cis-trans isomerase, periplasmic protein		ytfC, slr1761	Other	Other Categories	Unknown	0.536737522	21.5	1.0
BLAST Output	PCC 11901 Accession	Percentage Identity	Alignment Length	Mismatches	Gap Open	Synechocystis sp. PCC 6803 Start	Synechocystis sp. PCC 6803 End	PCC 11901 Start	PCC 11901 End	E-value	Bit Score
tr|P73037|P73037_SYNY3	WP_030007856.1	61.582	177	64	3	26	201	1	174	2.92e-67	201
slr1974	P74120	GTP binding protein			Other	Other Categories	Unknown	0.49381854	50.8	0.0
BLAST Output	PCC 11901 Accession	Percentage Identity	Alignment Length	Mismatches	Gap Open	Synechocystis sp. PCC 6803 Start	Synechocystis sp. PCC 6803 End	PCC 11901 Start	PCC 11901 End	E-value	Bit Score
sp|P74120|DER_SYNY3	WP_012305762.1	77.704	453	100	1	1	452	1	453	0.0	728
sp|P74120|DER_SYNY3	WP_138073099.1	39.850	133	75	2	177	307	222	351	6.98e-21	91.3
sp|P74120|DER_SYNY3	WP_138073099.1	34.667	150	83	5	6	142	224	371	3.21e-13	67.8
sp|P74120|DER_SYNY3	WP_030007130.1	28.659	164	110	4	179	342	23	179	3.84e-13	66.6
sp|P74120|DER_SYNY3	WP_030007130.1	31.034	174	114	4	6	174	23	195	4.22e-11	60.5
sp|P74120|DER_SYNY3	WP_181445693.1	29.861	144	90	4	3	137	393	534	2.09e-05	43.1
sp|P74120|DER_SYNY3	WP_181445693.1	25.564	133	88	3	180	304	397	526	0.087	31.6
sp|P74120|DER_SYNY3	WP_012308017.1	27.344	128	76	5	219	344	69	181	4.17e-04	38.9
sp|P74120|DER_SYNY3	WP_012308017.1	21.390	187	115	4	7	170	13	190	0.004	35.8
sp|P74120|DER_SYNY3	WP_138073360.1	31.579	76	45	4	6	76	21	94	6.98e-04	38.5
sp|P74120|DER_SYNY3	WP_138073360.1	35.088	57	36	1	178	234	20	75	0.006	35.4
sp|P74120|DER_SYNY3	WP_138071986.1	23.438	128	88	3	173	298	58	177	0.003	36.2
sp|P74120|DER_SYNY3	WP_138071986.1	28.682	129	73	6	6	126	64	181	0.19	30.4
sp|P74120|DER_SYNY3	WP_138073307.1	25.137	183	107	8	178	345	161	328	0.003	35.8
sp|P74120|DER_SYNY3	WP_030006721.1	29.008	131	79	4	173	298	129	250	0.010	34.7
sp|P74120|DER_SYNY3	WP_138072710.1	26.056	142	81	6	1	126	1	134	0.013	34.3
sp|P74120|DER_SYNY3	WP_138073400.1	22.857	140	78	4	7	125	20	150	0.020	33.5
sp|P74120|DER_SYNY3	WP_138073575.1	26.364	220	114	11	170	361	61	260	0.038	32.7
sp|P74120|DER_SYNY3	WP_062434581.1	53.846	26	12	0	177	202	2	27	0.038	32.3
sp|P74120|DER_SYNY3	WP_062434581.1	48.387	31	16	0	8	38	6	36	0.073	31.6
sp|P74120|DER_SYNY3	WP_138072031.1	40.541	37	21	1	4	39	122	158	0.051	32.0
sp|P74120|DER_SYNY3	WP_138072031.1	36.111	36	23	0	177	212	123	158	0.075	31.6
sp|P74120|DER_SYNY3	WP_138073867.1	57.895	19	8	0	6	24	224	242	0.87	28.5
slr2053	P73096	putative hydrolase			Other	Other Categories	Unknown	0.658772967	31.9	0.0
BLAST Output	PCC 11901 Accession	Percentage Identity	Alignment Length	Mismatches	Gap Open	Synechocystis sp. PCC 6803 Start	Synechocystis sp. PCC 6803 End	PCC 11901 Start	PCC 11901 End	E-value	Bit Score
tr|P73096|P73096_SYNY3	WP_138073813.1	44.604	278	152	2	1	278	1	276	5.87e-86	255
tr|P73096|P73096_SYNY3	WP_138073102.1	25.939	293	182	9	12	281	16	296	8.40e-13	63.9
tr|P73096|P73096_SYNY3	WP_138072871.1	20.482	249	173	7	24	263	46	278	1.84e-07	47.8
tr|P73096|P73096_SYNY3	WP_138072708.1	37.838	74	41	2	58	130	54	123	8.79e-07	45.4
tr|P73096|P73096_SYNY3	WP_138073725.1	22.909	275	173	10	16	267	27	285	5.72e-06	43.5
tr|P73096|P73096_SYNY3	WP_138071980.1	21.181	288	193	10	15	280	18	293	9.48e-06	42.7
tr|P73096|P73096_SYNY3	WP_138073319.1	27.273	121	81	3	30	150	29	142	5.78e-05	40.0
tr|P73096|P73096_SYNY3	WP_138073101.1	30.357	112	67	3	27	135	2457	2560	1.03e-04	40.0
tr|P73096|P73096_SYNY3	WP_138073692.1	22.182	275	189	11	20	280	29	292	2.29e-04	38.5
tr|P73096|P73096_SYNY3	WP_138071722.1	20.543	258	193	5	26	279	18	267	6.82e-04	37.0
tr|P73096|P73096_SYNY3	WP_138073310.1	20.939	277	173	11	30	282	26	280	0.011	33.1
tr|P73096|P73096_SYNY3	WP_052349673.1	28.947	76	50	2	21	93	34	108	0.34	28.1
slr2087	P73912	c-type cytochrome biogenesis protein Ccs1	ccs1, ycf44	ycf44, ccsB	Other	Other Categories	Unknown	0.29779544	50.6	3.0
BLAST Output	PCC 11901 Accession	Percentage Identity	Alignment Length	Mismatches	Gap Open	Synechocystis sp. PCC 6803 Start	Synechocystis sp. PCC 6803 End	PCC 11901 Start	PCC 11901 End	E-value	Bit Score
sp|P73912|CCS1_SYNY3	WP_138072972.1	57.792	462	185	4	1	458	1	456	0.0	555
sp|P73912|CCS1_SYNY3	WP_138073702.1	26.829	82	51	2	79	156	2	78	0.46	29.3
slr5054	Q6ZES6	probable glycosyltransferase			Other	Other Categories	Unknown	0.509905095	37.6	1.0
BLAST Output	PCC 11901 Accession	Percentage Identity	Alignment Length	Mismatches	Gap Open	Synechocystis sp. PCC 6803 Start	Synechocystis sp. PCC 6803 End	PCC 11901 Start	PCC 11901 End	E-value	Bit Score
tr|Q6ZES6|Q6ZES6_SYNY3	WP_138073746.1	40.299	67	38	2	1	65	1	67	1.52e-07	48.9
tr|Q6ZES6|Q6ZES6_SYNY3	WP_138071512.1	25.000	100	71	4	1	96	1	100	0.004	35.0
tr|Q6ZES6|Q6ZES6_SYNY3	WP_030006148.1	23.581	229	130	9	1	204	1	209	0.025	32.3
tr|Q6ZES6|Q6ZES6_SYNY3	WP_138073297.1	26.374	91	61	3	17	107	22	106	0.076	30.8
tr|Q6ZES6|Q6ZES6_SYNY3	WP_138071930.1	23.585	106	74	4	111	213	25	126	0.19	29.3
tr|Q6ZES6|Q6ZES6_SYNY3	WP_138073293.1	27.027	74	50	1	4	73	24	97	0.23	29.3
sll0621	P74579	putative c-type cytochrome biogenesis protein CcdA	ccdA	dsbD, cycZ	Other	Other Categories
BLAST Output	PCC 11901 Accession	Percentage Identity	Alignment Length	Mismatches	Gap Open	Synechocystis sp. PCC 6803 Start	Synechocystis sp. PCC 6803 End	PCC 11901 Start	PCC 11901 End	E-value	Bit Score
tr|P74579|P74579_SYNY3	WP_030006214.1	66.803	244	81	0	1	244	1	244	2.44e-103	296
sll0654	P72939	alkaline phosphatase		phoA	Other	Other Categories
BLAST Output	PCC 11901 Accession	Percentage Identity	Alignment Length	Mismatches	Gap Open	Synechocystis sp. PCC 6803 Start	Synechocystis sp. PCC 6803 End	PCC 11901 Start	PCC 11901 End	E-value	Bit Score
tr|P72939|P72939_SYNY3	WP_138071323.1	25.000	324	170	12	215	534	201	455	2.13e-15	77.0
tr|P72939|P72939_SYNY3	WP_138071323.1	25.606	289	157	11	54	315	54	311	0.067	33.9
tr|P72939|P72939_SYNY3	WP_138073743.1	30.769	182	92	8	533	709	76	228	5.99e-10	60.1
tr|P72939|P72939_SYNY3	WP_138073738.1	22.761	536	279	23	585	1113	56	463	6.74e-10	59.7
tr|P72939|P72939_SYNY3	WP_138073906.1	29.907	107	62	3	399	504	10	104	0.006	37.4
sll0686	Q55193	probable cytochrome c-type biogenesis protein			Other	Other Categories
BLAST Output	PCC 11901 Accession	Percentage Identity	Alignment Length	Mismatches	Gap Open	Synechocystis sp. PCC 6803 Start	Synechocystis sp. PCC 6803 End	PCC 11901 Start	PCC 11901 End	E-value	Bit Score
tr|Q55193|Q55193_SYNY3	WP_030006214.1	32.547	212	132	3	52	252	11	222	1.02e-22	90.5
sll0777	Q55957	putative carboxypeptidase			Other	Other Categories
BLAST Output	PCC 11901 Accession	Percentage Identity	Alignment Length	Mismatches	Gap Open	Synechocystis sp. PCC 6803 Start	Synechocystis sp. PCC 6803 End	PCC 11901 Start	PCC 11901 End	E-value	Bit Score
tr|Q55957|Q55957_SYNY3	WP_181445665.1	48.214	168	82	4	138	303	94	258	2.35e-46	154
tr|Q55957|Q55957_SYNY3	WP_138073635.1	36.000	50	26	2	74	123	197	240	0.76	28.1
sll0818	P74038	tetrapyrrole methylase family protein			Other	Other Categories
BLAST Output	PCC 11901 Accession	Percentage Identity	Alignment Length	Mismatches	Gap Open	Synechocystis sp. PCC 6803 Start	Synechocystis sp. PCC 6803 End	PCC 11901 Start	PCC 11901 End	E-value	Bit Score
sp|P74038|RSMI_SYNY3	WP_099238916.1	60.289	277	109	1	2	277	5	281	3.15e-120	342
sp|P74038|RSMI_SYNY3	WP_030007760.1	28.333	180	110	7	1	165	11	186	3.53e-04	37.7
sll0829	Q55423	probable methyltransferase		rapQ	Other	Other Categories
BLAST Output	PCC 11901 Accession	Percentage Identity	Alignment Length	Mismatches	Gap Open	Synechocystis sp. PCC 6803 Start	Synechocystis sp. PCC 6803 End	PCC 11901 Start	PCC 11901 End	E-value	Bit Score
sp|Q55423|Y829_SYNY3	WP_138073079.1	58.252	206	86	0	1	206	1	206	1.84e-84	246
sp|Q55423|Y829_SYNY3	WP_138071335.1	32.370	173	105	5	26	187	115	286	3.09e-15	69.3
sp|Q55423|Y829_SYNY3	WP_138073460.1	32.000	150	91	5	48	187	149	297	9.41e-13	62.4
sp|Q55423|Y829_SYNY3	WP_138072827.1	40.777	103	52	4	49	145	48	147	9.57e-13	61.2
sp|Q55423|Y829_SYNY3	WP_138073490.1	30.857	175	105	6	35	196	26	197	3.32e-11	57.8
sp|Q55423|Y829_SYNY3	WP_030006221.1	29.927	137	83	6	25	151	28	161	1.40e-09	52.8
sp|Q55423|Y829_SYNY3	WP_138072507.1	25.641	156	94	6	48	196	41	181	5.76e-09	51.2
sp|Q55423|Y829_SYNY3	WP_138071792.1	32.500	120	69	4	43	152	90	207	9.24e-09	50.8
sp|Q55423|Y829_SYNY3	WP_138073463.1	35.211	142	73	9	27	151	35	174	1.09e-08	50.4
sp|Q55423|Y829_SYNY3	WP_138073548.1	34.259	108	57	4	48	143	57	162	9.49e-07	45.1
sp|Q55423|Y829_SYNY3	WP_138073261.1	24.645	211	102	7	45	203	66	271	1.72e-05	41.2
sp|Q55423|Y829_SYNY3	WP_138072814.1	28.829	111	69	4	49	151	48	156	4.27e-04	36.6
sp|Q55423|Y829_SYNY3	WP_099240709.1	26.957	115	72	5	43	155	45	149	0.029	31.2
sp|Q55423|Y829_SYNY3	WP_138073322.1	24.852	169	99	9	46	195	71	230	0.033	30.8
sp|Q55423|Y829_SYNY3	WP_138071341.1	29.293	99	61	2	52	141	48	146	0.20	28.5
sp|Q55423|Y829_SYNY3	WP_030006983.1	22.772	101	59	2	44	141	354	438	0.47	27.7
sp|Q55423|Y829_SYNY3	WP_138073385.1	33.333	45	28	1	41	83	19	63	0.98	26.6
sll0873	P73562	carboxynorspermidine decarboxylase		napC	Other	Other Categories
BLAST Output	PCC 11901 Accession	Percentage Identity	Alignment Length	Mismatches	Gap Open	Synechocystis sp. PCC 6803 Start	Synechocystis sp. PCC 6803 End	PCC 11901 Start	PCC 11901 End	E-value	Bit Score
tr|P73562|P73562_SYNY3	WP_138072015.1	30.000	60	38	1	306	361	54	113	0.016	33.1
tr|P73562|P73562_SYNY3	WP_099240768.1	24.176	91	61	3	70	160	117	199	0.12	30.4
tr|P73562|P73562_SYNY3	WP_062433174.1	29.412	68	45	2	185	249	344	411	0.25	29.6
sll0992	P73137	putative esterase			Other	Other Categories
BLAST Output	PCC 11901 Accession	Percentage Identity	Alignment Length	Mismatches	Gap Open	Synechocystis sp. PCC 6803 Start	Synechocystis sp. PCC 6803 End	PCC 11901 Start	PCC 11901 End	E-value	Bit Score
tr|P73137|P73137_SYNY3	WP_138073774.1	56.716	268	114	2	10	275	13	280	4.93e-109	313
tr|P73137|P73137_SYNY3	WP_168191132.1	28.448	116	72	4	140	254	145	250	0.004	34.7
tr|P73137|P73137_SYNY3	WP_138071609.1	29.508	61	42	1	140	200	339	398	0.094	30.4
tr|P73137|P73137_SYNY3	WP_138073725.1	32.558	43	24	1	212	254	241	278	0.16	29.6
tr|P73137|P73137_SYNY3	WP_012307035.1	23.158	95	72	1	38	131	2	96	0.34	27.3
tr|P73137|P73137_SYNY3	WP_138072691.1	30.769	52	35	1	120	170	130	181	0.35	28.5
tr|P73137|P73137_SYNY3	WP_138072178.1	57.143	21	9	0	135	155	320	340	0.40	28.5
tr|P73137|P73137_SYNY3	WP_138073884.1	21.875	128	87	5	32	155	212	330	0.45	28.5
sll1849	P74496	probable dioxygenase Rieske iron-sulfur component			Other	Other Categories
BLAST Output	PCC 11901 Accession	Percentage Identity	Alignment Length	Mismatches	Gap Open	Synechocystis sp. PCC 6803 Start	Synechocystis sp. PCC 6803 End	PCC 11901 Start	PCC 11901 End	E-value	Bit Score
tr|P74496|P74496_SYNY3	WP_138073672.1	32.374	139	83	3	14	142	32	169	3.69e-18	78.2
tr|P74496|P74496_SYNY3	WP_138071650.1	23.077	169	116	4	13	169	22	188	3.02e-11	58.5
tr|P74496|P74496_SYNY3	WP_181445685.1	33.333	30	20	0	87	116	203	232	0.19	28.9
sll5043	Q6ZET7	probable glycosyltransferase			Other	Other Categories
BLAST Output	PCC 11901 Accession	Percentage Identity	Alignment Length	Mismatches	Gap Open	Synechocystis sp. PCC 6803 Start	Synechocystis sp. PCC 6803 End	PCC 11901 Start	PCC 11901 End	E-value	Bit Score
tr|Q6ZET7|Q6ZET7_SYNY3	WP_030006148.1	23.707	232	143	8	15	240	4	207	8.98e-07	46.2
tr|Q6ZET7|Q6ZET7_SYNY3	WP_138073559.1	25.101	247	152	10	6	242	44	267	7.58e-06	43.5
tr|Q6ZET7|Q6ZET7_SYNY3	WP_138073293.1	21.186	118	86	2	14	131	23	133	6.92e-05	40.4
tr|Q6ZET7|Q6ZET7_SYNY3	WP_138073297.1	25.203	123	83	3	14	135	4	118	0.005	34.7
tr|Q6ZET7|Q6ZET7_SYNY3	WP_030008213.1	32.813	64	40	2	195	255	173	236	0.045	31.6
sll5049	Q6ZET1	similar to polysaccharide biosynthesis protein			Other	Other Categories
BLAST Output	PCC 11901 Accession	Percentage Identity	Alignment Length	Mismatches	Gap Open	Synechocystis sp. PCC 6803 Start	Synechocystis sp. PCC 6803 End	PCC 11901 Start	PCC 11901 End	E-value	Bit Score
tr|Q6ZET1|Q6ZET1_SYNY3	WP_030006162.1	27.273	77	42	2	117	179	94	170	0.080	31.2
sll5057	Q6ZES3	probable glycosyltransferase			Other	Other Categories
BLAST Output	PCC 11901 Accession	Percentage Identity	Alignment Length	Mismatches	Gap Open	Synechocystis sp. PCC 6803 Start	Synechocystis sp. PCC 6803 End	PCC 11901 Start	PCC 11901 End	E-value	Bit Score
tr|Q6ZES3|Q6ZES3_SYNY3	WP_181445687.1	49.405	168	82	2	146	310	263	430	2.78e-53	177
tr|Q6ZES3|Q6ZES3_SYNY3	WP_138071412.1	42.857	203	104	6	123	316	44	243	9.12e-44	147
tr|Q6ZES3|Q6ZES3_SYNY3	WP_062433658.1	23.750	80	53	2	39	118	38	109	0.28	27.7
sll5084	Q6ZEP6	probable plasmid partitioning protein, ParB			Other	Other Categories
BLAST Output	PCC 11901 Accession	Percentage Identity	Alignment Length	Mismatches	Gap Open	Synechocystis sp. PCC 6803 Start	Synechocystis sp. PCC 6803 End	PCC 11901 Start	PCC 11901 End	E-value	Bit Score
sll5094	Q6ZEN6	plasmid stabilization protein			Other	Other Categories
BLAST Output	PCC 11901 Accession	Percentage Identity	Alignment Length	Mismatches	Gap Open	Synechocystis sp. PCC 6803 Start	Synechocystis sp. PCC 6803 End	PCC 11901 Start	PCC 11901 End	E-value	Bit Score
tr|Q6ZEN6|Q6ZEN6_SYNY3	WP_138072011.1	34.328	134	88	0	5	138	3	136	2.86e-23	85.5
tr|Q6ZEN6|Q6ZEN6_SYNY3	WP_138073670.1	30.000	130	77	5	4	130	5	123	2.69e-08	46.2
tr|Q6ZEN6|Q6ZEN6_SYNY3	WP_138071939.1	52.000	25	12	0	106	130	64	88	0.038	28.9
sll7003	Q6ZEJ5	plasmid stability protein			Other	Other Categories
BLAST Output	PCC 11901 Accession	Percentage Identity	Alignment Length	Mismatches	Gap Open	Synechocystis sp. PCC 6803 Start	Synechocystis sp. PCC 6803 End	PCC 11901 Start	PCC 11901 End	E-value	Bit Score
tr|Q6ZEJ5|Q6ZEJ5_SYNY3	WP_138072011.1	26.812	138	91	5	8	138	3	137	2.78e-05	38.1
tr|Q6ZEJ5|Q6ZEJ5_SYNY3	WP_138073670.1	27.642	123	83	3	7	128	5	122	2.02e-04	35.8
tr|Q6ZEJ5|Q6ZEJ5_SYNY3	WP_138071939.1	57.692	26	11	0	103	128	62	87	0.014	30.0
tr|Q6ZEJ5|Q6ZEJ5_SYNY3	WP_138072086.1	27.941	68	44	2	28	95	55	117	0.30	26.9
sll8034	Q6ZE58	2-nitropropane dioxygenase			Other	Other Categories
BLAST Output	PCC 11901 Accession	Percentage Identity	Alignment Length	Mismatches	Gap Open	Synechocystis sp. PCC 6803 Start	Synechocystis sp. PCC 6803 End	PCC 11901 Start	PCC 11901 End	E-value	Bit Score
tr|Q6ZE58|Q6ZE58_SYNY3	WP_012305900.1	39.474	38	23	0	166	203	256	293	0.15	30.0
tr|Q6ZE58|Q6ZE58_SYNY3	WP_138073086.1	37.500	72	42	2	156	227	255	323	0.17	30.0
tr|Q6ZE58|Q6ZE58_SYNY3	WP_138071323.1	37.500	40	24	1	142	180	342	381	0.74	28.1
slr0095	Q55813	O-methyltransferase			Other	Other Categories
BLAST Output	PCC 11901 Accession	Percentage Identity	Alignment Length	Mismatches	Gap Open	Synechocystis sp. PCC 6803 Start	Synechocystis sp. PCC 6803 End	PCC 11901 Start	PCC 11901 End	E-value	Bit Score
tr|Q55813|Q55813_SYNY3	WP_065710250.1	51.131	221	105	2	1	219	1	220	4.17e-73	218
tr|Q55813|Q55813_SYNY3	WP_138072507.1	29.252	147	86	7	45	186	22	155	2.82e-04	37.4
tr|Q55813|Q55813_SYNY3	WP_138073822.1	35.417	48	30	1	43	90	306	352	0.11	29.6
tr|Q55813|Q55813_SYNY3	WP_138072704.1	25.974	77	55	1	107	181	174	250	0.16	29.3
tr|Q55813|Q55813_SYNY3	WP_138073341.1	31.250	64	43	1	65	128	124	186	0.17	28.9
tr|Q55813|Q55813_SYNY3	WP_138073261.1	25.157	159	93	5	64	208	70	216	0.17	29.3
tr|Q55813|Q55813_SYNY3	WP_138073548.1	26.829	82	57	2	59	140	53	131	0.59	27.3
tr|Q55813|Q55813_SYNY3	WP_045441530.1	37.500	56	30	3	159	212	172	224	1.00	26.9
slr0231	Q55703	probable DNA-3-methyladenine glycosylase			Other	Other Categories
BLAST Output	PCC 11901 Accession	Percentage Identity	Alignment Length	Mismatches	Gap Open	Synechocystis sp. PCC 6803 Start	Synechocystis sp. PCC 6803 End	PCC 11901 Start	PCC 11901 End	E-value	Bit Score
tr|Q55703|Q55703_SYNY3	WP_083500703.1	37.143	35	18	1	66	100	9	39	0.26	27.3
slr0298	Q55902	FraH protein homolog		fraH	Other	Other Categories
BLAST Output	PCC 11901 Accession	Percentage Identity	Alignment Length	Mismatches	Gap Open	Synechocystis sp. PCC 6803 Start	Synechocystis sp. PCC 6803 End	PCC 11901 Start	PCC 11901 End	E-value	Bit Score
tr|Q55902|Q55902_SYNY3	WP_138072939.1	68.142	113	36	0	97	209	156	268	8.23e-51	162
tr|Q55902|Q55902_SYNY3	WP_138073030.1	44.615	130	67	3	84	209	303	431	4.21e-29	108
tr|Q55902|Q55902_SYNY3	WP_138073506.1	43.103	58	30	2	149	205	42	97	1.29e-07	47.8
tr|Q55902|Q55902_SYNY3	WP_065710457.1	48.387	62	29	3	148	208	50	109	5.44e-07	45.8
tr|Q55902|Q55902_SYNY3	WP_012306106.1	40.741	54	24	3	123	176	24	69	1.12e-04	37.4
tr|Q55902|Q55902_SYNY3	WP_138071756.1	37.500	48	28	1	1	48	1	46	2.37e-04	37.7
tr|Q55902|Q55902_SYNY3	WP_138071782.1	37.288	59	26	2	145	203	53	100	0.004	34.3
tr|Q55902|Q55902_SYNY3	WP_138072798.1	31.667	60	39	2	24	81	599	658	0.35	28.1
tr|Q55902|Q55902_SYNY3	WP_138073915.1	26.316	57	35	1	4	53	206	262	0.46	27.3
tr|Q55902|Q55902_SYNY3	WP_138071541.1	38.889	36	17	2	24	55	330	364	0.79	26.9
slr0314	Q55921	non-heme chloroperoxidase			Other	Other Categories
BLAST Output	PCC 11901 Accession	Percentage Identity	Alignment Length	Mismatches	Gap Open	Synechocystis sp. PCC 6803 Start	Synechocystis sp. PCC 6803 End	PCC 11901 Start	PCC 11901 End	E-value	Bit Score
sp|Q55921|PRXC_SYNY3	WP_138071980.1	25.899	278	181	9	16	276	23	292	5.97e-12	61.2
sp|Q55921|PRXC_SYNY3	WP_138073338.1	32.692	104	61	3	27	123	34	135	8.97e-10	54.7
sp|Q55921|PRXC_SYNY3	WP_138073319.1	30.275	109	74	2	17	125	20	126	1.16e-09	54.3
sp|Q55921|PRXC_SYNY3	WP_138073102.1	29.787	94	60	3	14	102	20	112	1.58e-07	48.1
sp|Q55921|PRXC_SYNY3	WP_138073692.1	22.509	271	195	8	15	275	25	290	1.93e-07	47.8
sp|Q55921|PRXC_SYNY3	WP_138073101.1	35.238	105	65	3	25	128	2458	2560	4.61e-07	47.4
sp|Q55921|PRXC_SYNY3	WP_138073725.1	24.603	252	160	11	26	258	39	279	6.03e-07	46.2
sp|Q55921|PRXC_SYNY3	WP_138073310.1	27.586	116	72	6	17	122	12	125	8.67e-07	45.8
sp|Q55921|PRXC_SYNY3	WP_138071722.1	21.484	256	184	8	27	276	23	267	8.87e-06	42.7
sp|Q55921|PRXC_SYNY3	WP_138072708.1	25.000	112	82	2	15	126	16	125	1.58e-04	38.9
sp|Q55921|PRXC_SYNY3	WP_138073813.1	29.730	74	49	1	26	96	29	102	0.001	36.6
sp|Q55921|PRXC_SYNY3	WP_138072871.1	26.336	262	172	11	22	276	47	294	0.001	36.2
sp|Q55921|PRXC_SYNY3	WP_138072178.1	32.813	64	43	0	14	77	223	286	0.010	33.5
sp|Q55921|PRXC_SYNY3	WP_168191132.1	22.594	239	115	12	27	257	74	250	0.014	32.7
sp|Q55921|PRXC_SYNY3	WP_138073248.1	29.293	99	61	4	26	121	7	99	0.059	30.4
sp|Q55921|PRXC_SYNY3	WP_138072916.1	20.906	287	168	13	16	258	24	295	0.100	30.0
sp|Q55921|PRXC_SYNY3	WP_138073740.1	27.000	100	52	3	58	150	76	161	0.34	28.9
slr0679	P72943	sun protein		fmu, fmv, sun	Other	Other Categories
BLAST Output	PCC 11901 Accession	Percentage Identity	Alignment Length	Mismatches	Gap Open	Synechocystis sp. PCC 6803 Start	Synechocystis sp. PCC 6803 End	PCC 11901 Start	PCC 11901 End	E-value	Bit Score
sp|P72943|RSMB_SYNY3	WP_138072491.1	51.448	449	210	4	1	445	1	445	4.05e-153	439
sp|P72943|RSMB_SYNY3	WP_012306559.1	28.571	98	65	3	40	133	117	213	0.007	34.3
sp|P72943|RSMB_SYNY3	WP_030006543.1	29.787	47	32	1	382	427	228	274	0.18	30.4
slr0700	Q55962	probable amino acid permease			Other	Other Categories
BLAST Output	PCC 11901 Accession	Percentage Identity	Alignment Length	Mismatches	Gap Open	Synechocystis sp. PCC 6803 Start	Synechocystis sp. PCC 6803 End	PCC 11901 Start	PCC 11901 End	E-value	Bit Score
slr1019	P73125	phenazine biosynthetic protein PhzF homolog			Other	Other Categories
BLAST Output	PCC 11901 Accession	Percentage Identity	Alignment Length	Mismatches	Gap Open	Synechocystis sp. PCC 6803 Start	Synechocystis sp. PCC 6803 End	PCC 11901 Start	PCC 11901 End	E-value	Bit Score
sp|P73125|Y1019_SYNY3	WP_138071995.1	47.712	306	143	7	3	304	5	297	5.69e-84	251
sp|P73125|Y1019_SYNY3	WP_138072136.1	31.373	51	34	1	21	71	85	134	0.38	27.7
slr1192	P74721	probable alcohol dehydrogenase		adhA, slr1192	Other	Other Categories
BLAST Output	PCC 11901 Accession	Percentage Identity	Alignment Length	Mismatches	Gap Open	Synechocystis sp. PCC 6803 Start	Synechocystis sp. PCC 6803 End	PCC 11901 Start	PCC 11901 End	E-value	Bit Score
sp|P74721|ADHA_SYNY3	WP_181445668.1	67.976	331	106	0	1	331	3	333	4.10e-175	486
sp|P74721|ADHA_SYNY3	WP_138072875.1	25.941	239	150	8	4	219	8	242	2.61e-06	45.1
sp|P74721|ADHA_SYNY3	WP_138073641.1	33.333	42	28	0	172	213	155	196	0.090	30.8
sp|P74721|ADHA_SYNY3	WP_012306922.1	27.273	88	53	3	118	199	135	217	0.12	30.4
sp|P74721|ADHA_SYNY3	WP_138073056.1	37.097	62	35	2	154	212	154	214	0.46	28.5
slr1520	P73964	oxidoreductase, aldo/keto reductase family			Other	Other Categories
BLAST Output	PCC 11901 Accession	Percentage Identity	Alignment Length	Mismatches	Gap Open	Synechocystis sp. PCC 6803 Start	Synechocystis sp. PCC 6803 End	PCC 11901 Start	PCC 11901 End	E-value	Bit Score
tr|P73964|P73964_SYNY3	WP_138072396.1	60.907	353	135	2	1	350	21	373	1.22e-148	421
tr|P73964|P73964_SYNY3	WP_065709867.1	40.456	351	201	3	6	348	39	389	2.31e-85	260
tr|P73964|P73964_SYNY3	WP_012307088.1	30.464	151	90	6	6	147	32	176	1.07e-09	55.5
tr|P73964|P73964_SYNY3	WP_138073720.1	61.905	21	8	0	307	327	128	148	0.033	32.3
tr|P73964|P73964_SYNY3	WP_012306637.1	28.767	73	45	3	141	211	91	158	0.30	28.9
tr|P73964|P73964_SYNY3	WP_012306860.1	54.545	22	9	1	311	331	44	65	0.64	26.2
slr2097	P73925	cyanoglobin	glbN	glbN, slr2097	Other	Other Categories
BLAST Output	PCC 11901 Accession	Percentage Identity	Alignment Length	Mismatches	Gap Open	Synechocystis sp. PCC 6803 Start	Synechocystis sp. PCC 6803 End	PCC 11901 Start	PCC 11901 End	E-value	Bit Score
sp|P73925|TRHBN_SYNY3	WP_012307234.1	59.677	124	50	0	1	124	1	124	5.80e-54	162
sp|P73925|TRHBN_SYNY3	WP_138071111.1	50.000	18	9	0	15	32	534	551	0.12	28.1
slr2126	P73993	probable glycosyltransferase			Other	Other Categories
BLAST Output	PCC 11901 Accession	Percentage Identity	Alignment Length	Mismatches	Gap Open	Synechocystis sp. PCC 6803 Start	Synechocystis sp. PCC 6803 End	PCC 11901 Start	PCC 11901 End	E-value	Bit Score
tr|P73993|P73993_SYNY3	WP_138073559.1	24.910	277	178	11	6	266	49	311	1.18e-09	55.1
tr|P73993|P73993_SYNY3	WP_030006148.1	23.982	221	145	8	10	222	4	209	1.98e-08	50.8
tr|P73993|P73993_SYNY3	WP_065711106.1	26.984	126	78	5	6	123	13	132	2.92e-04	38.1
tr|P73993|P73993_SYNY3	WP_138073297.1	26.549	113	78	3	10	122	5	112	0.005	34.3
tr|P73993|P73993_SYNY3	WP_138073293.1	25.664	113	76	4	10	120	24	130	0.015	32.7
tr|P73993|P73993_SYNY3	WP_138071371.1	31.818	44	20	1	46	79	254	297	0.50	28.1
slr5055	Q6ZES5	similar to UDP-N-acetyl-D-mannosaminuronic acid transferase			Other	Other Categories
BLAST Output	PCC 11901 Accession	Percentage Identity	Alignment Length	Mismatches	Gap Open	Synechocystis sp. PCC 6803 Start	Synechocystis sp. PCC 6803 End	PCC 11901 Start	PCC 11901 End	E-value	Bit Score
tr|Q6ZES5|Q6ZES5_SYNY3	WP_168191163.1	32.381	210	138	3	28	237	36	241	1.11e-30	111
tr|Q6ZES5|Q6ZES5_SYNY3	WP_138073077.1	28.151	238	157	8	1	235	8	234	4.11e-19	80.5
slr5056	Q6ZES4	probable glycosyltransferase			Other	Other Categories
BLAST Output	PCC 11901 Accession	Percentage Identity	Alignment Length	Mismatches	Gap Open	Synechocystis sp. PCC 6803 Start	Synechocystis sp. PCC 6803 End	PCC 11901 Start	PCC 11901 End	E-value	Bit Score
tr|Q6ZES4|Q6ZES4_SYNY3	WP_138073293.1	21.212	99	74	1	100	198	23	117	9.29e-05	40.8
tr|Q6ZES4|Q6ZES4_SYNY3	WP_138073604.1	29.032	62	44	0	272	333	542	603	7.17e-04	38.5
tr|Q6ZES4|Q6ZES4_SYNY3	WP_138073559.1	27.184	103	64	2	101	196	53	151	0.002	36.6
tr|Q6ZES4|Q6ZES4_SYNY3	WP_138073805.1	24.074	108	75	2	99	203	3	106	0.012	33.9
tr|Q6ZES4|Q6ZES4_SYNY3	WP_065711106.1	27.523	109	65	5	101	201	17	119	0.33	29.6
tr|Q6ZES4|Q6ZES4_SYNY3	WP_138072144.1	42.105	38	21	1	114	150	156	193	0.37	29.3
slr5093	Q6ZEN7	probable flavin-containing amine oxidase			Other	Other Categories
BLAST Output	PCC 11901 Accession	Percentage Identity	Alignment Length	Mismatches	Gap Open	Synechocystis sp. PCC 6803 Start	Synechocystis sp. PCC 6803 End	PCC 11901 Start	PCC 11901 End	E-value	Bit Score
tr|Q6ZEN7|Q6ZEN7_SYNY3	WP_030006437.1	29.167	96	61	2	362	455	362	452	2.64e-05	42.7
tr|Q6ZEN7|Q6ZEN7_SYNY3	WP_030006437.1	54.054	37	17	0	39	75	3	39	6.57e-05	41.6
tr|Q6ZEN7|Q6ZEN7_SYNY3	WP_138072513.1	35.714	70	44	1	39	108	3	71	1.28e-04	40.4
tr|Q6ZEN7|Q6ZEN7_SYNY3	WP_138073353.1	38.462	65	39	1	39	103	6	69	0.001	37.4
tr|Q6ZEN7|Q6ZEN7_SYNY3	WP_138073436.1	33.333	66	39	2	37	100	5	67	0.003	36.2
tr|Q6ZEN7|Q6ZEN7_SYNY3	WP_138073215.1	31.746	63	42	1	222	283	107	169	0.021	33.1
tr|Q6ZEN7|Q6ZEN7_SYNY3	WP_138073215.1	34.328	67	41	2	39	103	4	69	0.041	32.3
tr|Q6ZEN7|Q6ZEN7_SYNY3	WP_138073502.1	36.620	71	38	3	29	95	2	69	0.022	33.5
tr|Q6ZEN7|Q6ZEN7_SYNY3	WP_138072865.1	38.000	50	30	1	33	81	93	142	0.24	30.0
tr|Q6ZEN7|Q6ZEN7_SYNY3	WP_065711238.1	43.750	32	18	0	37	68	6	37	0.47	29.3
slr5105	Q6ZEM5	plasmid partitioning protein, ParA family		parA	Other	Other Categories
BLAST Output	PCC 11901 Accession	Percentage Identity	Alignment Length	Mismatches	Gap Open	Synechocystis sp. PCC 6803 Start	Synechocystis sp. PCC 6803 End	PCC 11901 Start	PCC 11901 End	E-value	Bit Score
tr|Q6ZEM5|Q6ZEM5_SYNY3	WP_138070987.1	50.761	197	96	1	1	196	1	197	5.95e-72	213
tr|Q6ZEM5|Q6ZEM5_SYNY3	WP_138071079.1	50.254	197	97	1	1	196	1	197	7.19e-70	208
tr|Q6ZEM5|Q6ZEM5_SYNY3	WP_012306948.1	30.846	201	132	1	2	195	6	206	4.90e-25	94.0
tr|Q6ZEM5|Q6ZEM5_SYNY3	WP_030008092.1	26.961	204	128	7	2	189	3	201	1.18e-09	52.4
tr|Q6ZEM5|Q6ZEM5_SYNY3	WP_012305478.1	32.174	115	69	3	3	112	4	114	4.83e-07	45.1
tr|Q6ZEM5|Q6ZEM5_SYNY3	WP_030007057.1	31.280	211	106	12	2	192	169	360	2.12e-06	43.9
tr|Q6ZEM5|Q6ZEM5_SYNY3	WP_062436859.1	23.077	182	126	7	3	177	5	179	6.17e-05	38.9
tr|Q6ZEM5|Q6ZEM5_SYNY3	WP_012307837.1	46.667	45	22	1	1	43	3	47	3.45e-04	37.0
tr|Q6ZEM5|Q6ZEM5_SYNY3	WP_041443966.1	33.803	71	42	4	3	71	1	68	0.005	33.5
tr|Q6ZEM5|Q6ZEM5_SYNY3	WP_138071252.1	40.909	44	24	1	3	44	5	48	0.009	32.7
tr|Q6ZEM5|Q6ZEM5_SYNY3	WP_012306542.1	45.946	37	19	1	2	37	99	135	0.021	31.6
tr|Q6ZEM5|Q6ZEM5_SYNY3	WP_012306145.1	45.946	37	19	1	2	37	4	40	0.030	31.2
tr|Q6ZEM5|Q6ZEM5_SYNY3	WP_012306303.1	26.744	86	50	3	33	117	69	142	0.40	27.7
tr|Q6ZEM5|Q6ZEM5_SYNY3	WP_138073836.1	32.000	50	30	2	59	105	109	157	0.56	27.3
slr8036	Q6ZE56	probable acetyltransferase			Other	Other Categories
BLAST Output	PCC 11901 Accession	Percentage Identity	Alignment Length	Mismatches	Gap Open	Synechocystis sp. PCC 6803 Start	Synechocystis sp. PCC 6803 End	PCC 11901 Start	PCC 11901 End	E-value	Bit Score
tr|Q6ZE56|Q6ZE56_SYNY3	WP_138072979.1	23.649	148	98	4	55	196	1	139	2.92e-05	39.7
tr|Q6ZE56|Q6ZE56_SYNY3	WP_138073675.1	31.915	94	55	4	106	198	48	133	0.003	33.9
slr8037	Q6ZE55	probable acetyltransferase			Other	Other Categories
BLAST Output	PCC 11901 Accession	Percentage Identity	Alignment Length	Mismatches	Gap Open	Synechocystis sp. PCC 6803 Start	Synechocystis sp. PCC 6803 End	PCC 11901 Start	PCC 11901 End	E-value	Bit Score
tr|Q6ZE55|Q6ZE55_SYNY3	WP_138072979.1	30.357	56	39	0	119	174	84	139	2.55e-04	37.7
tr|Q6ZE55|Q6ZE55_SYNY3	WP_138072444.1	26.812	138	90	3	210	342	103	234	0.010	33.9
tr|Q6ZE55|Q6ZE55_SYNY3	WP_138072132.1	28.723	94	52	3	317	402	326	412	0.045	32.3
ssr7040	Q6ZEF8	probable cell growth regulatory protein		abrB	Other	Other Categories
BLAST Output	PCC 11901 Accession	Percentage Identity	Alignment Length	Mismatches	Gap Open	Synechocystis sp. PCC 6803 Start	Synechocystis sp. PCC 6803 End	PCC 11901 Start	PCC 11901 End	E-value	Bit Score
tr|Q6ZEF8|Q6ZEF8_SYNY3	WP_030008115.1	35.484	31	20	0	4	34	5	35	0.004	30.0
slr0143	P74442	WD-repeat protein, Hat protein, involved in the control of a high-affinity transport system for inorganic carbon	hat	hat	WD repeat protein	Other Categories	PM	0.891344311	131.8	0.0
BLAST Output	PCC 11901 Accession	Percentage Identity	Alignment Length	Mismatches	Gap Open	Synechocystis sp. PCC 6803 Start	Synechocystis sp. PCC 6803 End	PCC 11901 Start	PCC 11901 End	E-value	Bit Score
sp|P74442|Y143_SYNY3	WP_138071982.1	27.413	259	166	5	552	794	1092	1344	3.39e-24	106
sp|P74442|Y143_SYNY3	WP_138071982.1	27.556	225	110	4	541	714	1124	1346	9.61e-16	79.0
sp|P74442|Y143_SYNY3	WP_138071982.1	24.528	159	116	1	998	1152	1101	1259	2.80e-10	61.2
sp|P74442|Y143_SYNY3	WP_138071982.1	29.412	102	72	0	733	834	1108	1209	8.56e-10	59.7
sp|P74442|Y143_SYNY3	WP_138071982.1	21.053	304	220	6	766	1068	1062	1346	1.28e-07	52.4
sp|P74442|Y143_SYNY3	WP_138071982.1	18.049	205	111	3	1012	1164	1156	1355	0.82	30.0
sp|P74442|Y143_SYNY3	WP_138073822.1	25.965	285	195	7	588	870	323	593	1.50e-17	84.3
sp|P74442|Y143_SYNY3	WP_138073822.1	19.643	280	183	5	554	793	330	607	5.74e-10	59.7
sp|P74442|Y143_SYNY3	WP_138073822.1	21.875	160	123	1	552	711	450	607	2.32e-07	51.2
sp|P74442|Y143_SYNY3	WP_138073822.1	18.487	119	96	1	554	671	491	609	4.06e-06	47.4
sp|P74442|Y143_SYNY3	WP_138073822.1	19.874	317	218	11	753	1065	323	607	5.03e-06	47.0
sp|P74442|Y143_SYNY3	WP_138073822.1	22.901	131	100	1	1018	1147	477	607	1.21e-04	42.4
sp|P74442|Y143_SYNY3	WP_138073822.1	24.051	158	110	5	998	1153	302	451	0.001	39.3
sp|P74442|Y143_SYNY3	WP_138072220.1	22.956	318	206	8	555	834	201	517	4.50e-16	79.3
sp|P74442|Y143_SYNY3	WP_138072220.1	24.627	268	172	9	508	752	257	517	8.47e-11	62.4
sp|P74442|Y143_SYNY3	WP_138072220.1	24.365	394	250	12	783	1147	95	469	6.07e-08	53.1
sp|P74442|Y143_SYNY3	WP_138072220.1	23.581	229	144	7	634	836	198	421	2.19e-06	48.1
sp|P74442|Y143_SYNY3	WP_138072220.1	21.579	380	217	12	755	1108	195	519	8.79e-06	46.2
sp|P74442|Y143_SYNY3	WP_138071379.1	32.468	77	48	2	973	1048	292	365	0.087	33.1
sp|P74442|Y143_SYNY3	WP_138071786.1	31.915	94	52	2	630	711	157	250	0.12	32.7
sll0163	Q55563	WD-repeat protein			WD repeat protein	Other Categories	Soluble proteins	0.938167749	189.8	0.0
BLAST Output	PCC 11901 Accession	Percentage Identity	Alignment Length	Mismatches	Gap Open	Synechocystis sp. PCC 6803 Start	Synechocystis sp. PCC 6803 End	PCC 11901 Start	PCC 11901 End	E-value	Bit Score
sp|Q55563|Y163_SYNY3	WP_138071982.1	25.444	338	214	5	1348	1650	1048	1382	1.21e-22	102
sp|Q55563|Y163_SYNY3	WP_138071982.1	26.400	250	173	3	1050	1288	1095	1344	2.14e-20	95.1
sp|Q55563|Y163_SYNY3	WP_138071982.1	25.498	251	174	3	1214	1452	1095	1344	8.12e-20	93.2
sp|Q55563|Y163_SYNY3	WP_138071982.1	25.210	238	163	3	1188	1412	1110	1345	3.92e-18	87.8
sp|Q55563|Y163_SYNY3	WP_138071982.1	22.300	287	202	5	1419	1691	1095	1374	5.01e-18	87.4
sp|Q55563|Y163_SYNY3	WP_138071982.1	25.116	215	150	2	1044	1247	1130	1344	1.65e-16	82.4
sp|Q55563|Y163_SYNY3	WP_138071982.1	30.872	149	100	2	1508	1656	1064	1209	1.14e-14	76.3
sp|Q55563|Y163_SYNY3	WP_138071982.1	26.519	181	120	3	1040	1208	1167	1346	1.72e-12	68.9
sp|Q55563|Y163_SYNY3	WP_138071982.1	25.513	341	212	13	435	758	481	796	7.37e-07	50.4
sp|Q55563|Y163_SYNY3	WP_138071982.1	33.333	63	42	0	1027	1089	1288	1350	3.68e-04	41.6
sp|Q55563|Y163_SYNY3	WP_138071982.1	27.119	59	43	0	1072	1130	1292	1350	0.005	37.7
sp|Q55563|Y163_SYNY3	WP_138073822.1	28.114	281	151	9	1176	1411	334	608	1.58e-19	91.3
sp|Q55563|Y163_SYNY3	WP_138073822.1	22.727	286	211	8	1375	1656	328	607	2.78e-17	84.0
sp|Q55563|Y163_SYNY3	WP_138073822.1	25.078	319	184	12	1012	1287	301	607	5.24e-16	79.7
sp|Q55563|Y163_SYNY3	WP_138073822.1	23.793	290	207	8	1252	1535	328	609	9.09e-16	79.0
sp|Q55563|Y163_SYNY3	WP_138073822.1	25.128	195	139	4	1468	1660	339	528	7.59e-11	63.2
sp|Q55563|Y163_SYNY3	WP_138073822.1	25.781	128	92	2	1085	1210	486	612	1.29e-05	46.2
sp|Q55563|Y163_SYNY3	WP_138073822.1	37.143	35	22	0	1624	1658	331	365	0.016	36.2
sp|Q55563|Y163_SYNY3	WP_138073822.1	35.616	73	42	2	1012	1083	540	608	0.028	35.4
sp|Q55563|Y163_SYNY3	WP_138072220.1	23.934	305	178	12	1374	1656	197	469	9.50e-10	59.3
sp|Q55563|Y163_SYNY3	WP_138072220.1	23.148	324	207	13	1293	1576	198	519	1.03e-09	59.3
sp|Q55563|Y163_SYNY3	WP_138072220.1	21.101	218	150	7	1051	1248	304	519	3.05e-08	54.7
sp|Q55563|Y163_SYNY3	WP_138072220.1	22.393	326	205	13	1046	1328	197	517	8.38e-08	53.1
sp|Q55563|Y163_SYNY3	WP_138072220.1	19.512	328	218	10	1210	1495	197	520	1.94e-06	48.9
sp|Q55563|Y163_SYNY3	WP_138072220.1	18.944	322	221	9	1251	1533	197	517	7.46e-04	40.4
sp|Q55563|Y163_SYNY3	WP_138073770.1	57.692	26	11	0	1173	1198	111	136	0.004	36.6
sp|Q55563|Y163_SYNY3	WP_138073770.1	48.276	29	14	1	1621	1649	109	136	0.090	32.3
sp|Q55563|Y163_SYNY3	WP_138073770.1	23.958	96	64	4	1153	1239	41	136	0.88	29.6
sp|Q55563|Y163_SYNY3	WP_012306948.1	27.723	101	63	1	537	637	9	99	0.22	31.6
sp|Q55563|Y163_SYNY3	WP_138073582.1	22.541	244	161	6	202	427	61	294	0.52	30.8
sp|Q55563|Y163_SYNY3	WP_138073278.1	31.148	61	31	1	272	321	52	112	0.82	30.4
sp|Q55563|Y163_SYNY3	WP_138071786.1	23.810	147	79	6	1355	1479	132	267	0.94	30.4
slr1409	P73594	periplasmic WD-repeat protein			WD repeat protein	Other Categories	Soluble proteins	0.890269191	35.7	0.0
BLAST Output	PCC 11901 Accession	Percentage Identity	Alignment Length	Mismatches	Gap Open	Synechocystis sp. PCC 6803 Start	Synechocystis sp. PCC 6803 End	PCC 11901 Start	PCC 11901 End	E-value	Bit Score
sp|P73594|Y1409_SYNY3	WP_138071982.1	28.977	176	112	4	160	326	1087	1258	1.29e-15	74.3
sp|P73594|Y1409_SYNY3	WP_138071982.1	23.875	289	184	7	40	325	1091	1346	2.84e-11	61.2
sp|P73594|Y1409_SYNY3	WP_138071982.1	26.573	143	96	3	186	320	1068	1209	1.73e-07	49.3
sp|P73594|Y1409_SYNY3	WP_138071982.1	28.000	75	53	1	53	126	1279	1353	0.17	30.0
sp|P73594|Y1409_SYNY3	WP_138073822.1	23.569	297	197	9	43	324	330	611	1.05e-12	65.1
sp|P73594|Y1409_SYNY3	WP_138072220.1	22.530	253	143	8	86	323	304	518	9.86e-05	40.4
sp|P73594|Y1409_SYNY3	WP_138072220.1	20.571	175	115	5	130	282	205	377	0.017	33.1
sp|P73594|Y1409_SYNY3	WP_138072220.1	24.638	69	43	1	60	119	403	471	0.58	28.5
sp|P73594|Y1409_SYNY3	WP_138073628.1	28.947	76	49	3	133	204	156	230	0.54	28.1
sp|P73594|Y1409_SYNY3	WP_138071804.1	37.209	43	26	1	31	73	351	392	0.88	27.7
sll1491	P74598	periplasmic WD-repeat protein			WD repeat protein	Other Categories
BLAST Output	PCC 11901 Accession	Percentage Identity	Alignment Length	Mismatches	Gap Open	Synechocystis sp. PCC 6803 Start	Synechocystis sp. PCC 6803 End	PCC 11901 Start	PCC 11901 End	E-value	Bit Score
sp|P74598|Y1491_SYNY3	WP_138073822.1	24.503	302	193	9	53	341	328	607	6.57e-21	90.5
sp|P74598|Y1491_SYNY3	WP_138073822.1	28.571	210	137	7	138	345	330	528	3.66e-17	79.0
sp|P74598|Y1491_SYNY3	WP_138071982.1	27.703	296	184	9	69	343	1059	1345	2.13e-17	80.1
sp|P74598|Y1491_SYNY3	WP_138071982.1	21.839	261	142	8	54	301	1134	1345	2.09e-04	39.7
sp|P74598|Y1491_SYNY3	WP_138071982.1	24.510	204	133	9	54	244	1175	1370	3.61e-04	38.9
sp|P74598|Y1491_SYNY3	WP_138072220.1	23.529	323	208	9	54	341	199	517	8.01e-15	71.6
sp|P74598|Y1491_SYNY3	WP_181445671.1	37.037	54	27	4	257	310	109	155	0.037	32.3
sp|P74598|Y1491_SYNY3	WP_138073770.1	30.189	53	35	1	296	348	98	148	0.22	28.9
sp|P74598|Y1491_SYNY3	WP_138072635.1	23.729	59	42	1	68	123	91	149	0.93	27.3
sp|P74598|Y1491_SYNY3	WP_084150025.1	27.451	102	67	2	107	202	278	378	0.93	27.7
slr1410	P73595	periplasmic WD-repeat protein			WD repeat protein	Other Categories	Unknown	0.531909649	36.0	0.0
BLAST Output	PCC 11901 Accession	Percentage Identity	Alignment Length	Mismatches	Gap Open	Synechocystis sp. PCC 6803 Start	Synechocystis sp. PCC 6803 End	PCC 11901 Start	PCC 11901 End	E-value	Bit Score
sp|P73595|Y1410_SYNY3	WP_138072220.1	28.272	191	92	7	71	250	362	518	4.94e-09	53.9
sp|P73595|Y1410_SYNY3	WP_138072220.1	27.381	84	37	3	59	127	443	517	0.011	33.9
sp|P73595|Y1410_SYNY3	WP_138072220.1	18.593	199	142	5	113	291	320	518	0.096	30.8
sp|P73595|Y1410_SYNY3	WP_138073822.1	22.552	337	215	13	17	330	293	606	4.96e-09	53.9
sp|P73595|Y1410_SYNY3	WP_138073822.1	21.250	160	114	4	14	168	455	607	1.16e-04	40.0
sp|P73595|Y1410_SYNY3	WP_138071982.1	22.368	304	197	9	36	317	1084	1370	3.30e-08	51.6
sp|P73595|Y1410_SYNY3	WP_138071982.1	24.561	114	84	2	216	328	1094	1206	4.00e-04	38.5
sp|P73595|Y1410_SYNY3	WP_138071982.1	22.099	181	89	4	205	333	1165	1345	0.043	32.3
slr8038	Q6ZE54	WD-repeat protein			WD repeat protein	Other Categories	Unknown	0.55194131	138.9	0.0
BLAST Output	PCC 11901 Accession	Percentage Identity	Alignment Length	Mismatches	Gap Open	Synechocystis sp. PCC 6803 Start	Synechocystis sp. PCC 6803 End	PCC 11901 Start	PCC 11901 End	E-value	Bit Score
tr|Q6ZE54|Q6ZE54_SYNY3	WP_138073822.1	27.129	317	218	4	859	1175	306	609	1.50e-23	103
tr|Q6ZE54|Q6ZE54_SYNY3	WP_138073822.1	27.027	296	190	8	804	1090	330	608	2.48e-16	80.5
tr|Q6ZE54|Q6ZE54_SYNY3	WP_138073822.1	25.874	286	202	7	637	920	329	606	5.06e-15	76.3
tr|Q6ZE54|Q6ZE54_SYNY3	WP_138073822.1	23.739	337	203	7	712	1048	326	608	3.43e-12	67.0
tr|Q6ZE54|Q6ZE54_SYNY3	WP_138073822.1	31.538	130	87	1	1052	1181	326	453	1.47e-11	65.1
tr|Q6ZE54|Q6ZE54_SYNY3	WP_138073822.1	22.140	271	171	4	605	837	339	607	8.82e-09	55.8
tr|Q6ZE54|Q6ZE54_SYNY3	WP_138071982.1	25.203	246	170	6	939	1174	1103	1344	4.02e-17	83.6
tr|Q6ZE54|Q6ZE54_SYNY3	WP_138071982.1	28.191	188	126	4	939	1126	1065	1243	9.63e-11	62.8
tr|Q6ZE54|Q6ZE54_SYNY3	WP_138071982.1	22.491	289	208	7	769	1048	1063	1344	1.36e-10	62.4
tr|Q6ZE54|Q6ZE54_SYNY3	WP_138071982.1	23.311	296	204	10	846	1125	1094	1382	7.66e-08	53.1
tr|Q6ZE54|Q6ZE54_SYNY3	WP_138071982.1	25.389	193	132	6	728	910	1142	1332	1.09e-07	52.8
tr|Q6ZE54|Q6ZE54_SYNY3	WP_138071982.1	23.214	224	153	7	594	801	1129	1349	1.75e-07	52.0
tr|Q6ZE54|Q6ZE54_SYNY3	WP_138071982.1	24.138	261	176	9	594	839	1092	1345	6.83e-07	50.1
tr|Q6ZE54|Q6ZE54_SYNY3	WP_138071982.1	21.166	326	218	12	587	889	1044	1353	1.09e-05	46.2
tr|Q6ZE54|Q6ZE54_SYNY3	WP_138073177.1	25.296	253	180	6	234	480	203	452	3.11e-14	73.6
tr|Q6ZE54|Q6ZE54_SYNY3	WP_138072220.1	26.019	319	197	11	723	1005	202	517	1.06e-11	65.1
tr|Q6ZE54|Q6ZE54_SYNY3	WP_138072220.1	23.028	317	208	8	850	1132	204	518	1.76e-09	58.2
tr|Q6ZE54|Q6ZE54_SYNY3	WP_138072220.1	21.779	326	213	10	885	1173	197	517	4.74e-08	53.5
tr|Q6ZE54|Q6ZE54_SYNY3	WP_138072220.1	24.038	312	198	9	934	1214	204	507	9.26e-08	52.4
tr|Q6ZE54|Q6ZE54_SYNY3	WP_138072220.1	23.101	316	209	6	808	1090	204	518	2.22e-07	51.2
tr|Q6ZE54|Q6ZE54_SYNY3	WP_138072220.1	22.581	186	118	6	1050	1217	194	371	2.51e-07	51.2
tr|Q6ZE54|Q6ZE54_SYNY3	WP_138072220.1	24.880	209	120	6	659	840	322	520	3.43e-04	40.8
tr|Q6ZE54|Q6ZE54_SYNY3	WP_138072220.1	20.513	195	136	4	1013	1189	199	392	0.034	34.7
tr|Q6ZE54|Q6ZE54_SYNY3	WP_138072220.1	29.167	72	45	2	605	670	445	516	0.12	32.7
tr|Q6ZE54|Q6ZE54_SYNY3	WP_138072220.1	18.981	216	123	7	596	796	340	518	0.35	31.2
tr|Q6ZE54|Q6ZE54_SYNY3	WP_138073770.1	33.333	51	31	1	1031	1078	82	132	0.17	31.2
tr|Q6ZE54|Q6ZE54_SYNY3	WP_138072883.1	39.474	38	23	0	557	594	183	220	0.21	31.6
tr|Q6ZE54|Q6ZE54_SYNY3	WP_012308045.1	28.333	60	37	2	712	769	93	148	0.38	30.8
tr|Q6ZE54|Q6ZE54_SYNY3	WP_065711483.1	27.869	122	71	5	423	537	40	151	0.58	30.4
sll0098	Q55880	hypothetical protein			Random proteins (Hypothetical)	Random proteins (Hypothetical)	Large ribosomal protein	0.77614038	38.8	0.0
BLAST Output	PCC 11901 Accession	Percentage Identity	Alignment Length	Mismatches	Gap Open	Synechocystis sp. PCC 6803 Start	Synechocystis sp. PCC 6803 End	PCC 11901 Start	PCC 11901 End	E-value	Bit Score
sp|Q55880|RLMN_SYNY3	WP_138072722.1	69.184	331	102	0	8	338	6	336	2.36e-178	495
sll0175	Q55555	hypothetical protein			Random proteins (Hypothetical)	Random proteins (Hypothetical)	Large ribosomal protein	0.846073747	59.2	0.0
BLAST Output	PCC 11901 Accession	Percentage Identity	Alignment Length	Mismatches	Gap Open	Synechocystis sp. PCC 6803 Start	Synechocystis sp. PCC 6803 End	PCC 11901 Start	PCC 11901 End	E-value	Bit Score
tr|Q55555|Q55555_SYNY3	WP_138072865.1	68.914	534	162	2	1	533	1	531	0.0	739
tr|Q55555|Q55555_SYNY3	WP_138073436.1	31.746	63	42	1	214	276	239	300	0.002	37.4
tr|Q55555|Q55555_SYNY3	WP_138073502.1	34.444	90	46	5	201	288	232	310	0.048	32.7
tr|Q55555|Q55555_SYNY3	WP_138072806.1	40.000	45	19	2	103	147	19	55	0.070	32.0
tr|Q55555|Q55555_SYNY3	WP_138073146.1	30.233	43	30	0	212	254	275	317	0.17	30.8
slr0064	Q55156	hypothetical protein			Random proteins (Hypothetical)	Random proteins (Hypothetical)	Large ribosomal protein	0.875909452	43.0	0.0
BLAST Output	PCC 11901 Accession	Percentage Identity	Alignment Length	Mismatches	Gap Open	Synechocystis sp. PCC 6803 Start	Synechocystis sp. PCC 6803 End	PCC 11901 Start	PCC 11901 End	E-value	Bit Score
sp|Q55156|Y064_SYNY3	WP_138073387.1	59.249	373	152	0	12	384	2	374	1.68e-173	485
sp|Q55156|Y064_SYNY3	WP_138073666.1	53.571	28	13	0	190	217	208	235	0.016	33.5
sp|Q55156|Y064_SYNY3	WP_168191123.1	28.723	94	59	3	116	207	292	379	0.75	28.1
slr0374	Q55589	hypothetical protein			Random proteins (Hypothetical)	Random proteins (Hypothetical)	Large ribosomal protein	0.799356693	56.4	0.0
BLAST Output	PCC 11901 Accession	Percentage Identity	Alignment Length	Mismatches	Gap Open	Synechocystis sp. PCC 6803 Start	Synechocystis sp. PCC 6803 End	PCC 11901 Start	PCC 11901 End	E-value	Bit Score
tr|Q55589|Q55589_SYNY3	WP_138073107.1	77.490	502	109	4	1	501	1	499	0.0	761
tr|Q55589|Q55589_SYNY3	WP_138073054.1	42.169	498	270	9	1	490	3	490	1.65e-122	364
tr|Q55589|Q55589_SYNY3	WP_030006813.1	39.881	504	274	8	5	485	10	507	8.76e-112	337
tr|Q55589|Q55589_SYNY3	WP_065710337.1	32.941	255	157	8	219	462	159	410	3.79e-24	102
tr|Q55589|Q55589_SYNY3	WP_012305681.1	34.348	230	132	9	225	441	159	382	1.15e-23	100
tr|Q55589|Q55589_SYNY3	WP_138073103.1	34.222	225	135	8	229	445	185	404	2.83e-23	99.8
tr|Q55589|Q55589_SYNY3	WP_138072301.1	33.186	226	132	9	229	441	175	394	9.25e-22	95.1
tr|Q55589|Q55589_SYNY3	WP_138072402.1	33.684	95	51	3	262	344	212	306	3.73e-06	45.8
tr|Q55589|Q55589_SYNY3	WP_138071325.1	32.632	95	52	3	262	344	205	299	1.27e-04	41.2
tr|Q55589|Q55589_SYNY3	WP_012307148.1	29.333	75	48	1	260	329	133	207	2.29e-04	40.0
tr|Q55589|Q55589_SYNY3	WP_138071830.1	39.474	38	23	0	256	293	339	376	0.025	33.5
tr|Q55589|Q55589_SYNY3	WP_012307505.1	34.783	46	29	1	254	298	35	80	0.12	30.8
tr|Q55589|Q55589_SYNY3	WP_138071390.1	42.424	33	19	0	35	67	176	208	0.16	30.8
tr|Q55589|Q55589_SYNY3	WP_062431746.1	25.532	94	59	2	262	344	205	298	0.57	29.3
ssr3189	P73656	hypothetical protein		ssr3189	Random proteins (Hypothetical)	Random proteins (Hypothetical)	Large ribosomal protein	0.843662481	6.2	0.0
BLAST Output	PCC 11901 Accession	Percentage Identity	Alignment Length	Mismatches	Gap Open	Synechocystis sp. PCC 6803 Start	Synechocystis sp. PCC 6803 End	PCC 11901 Start	PCC 11901 End	E-value	Bit Score
sll0071	Q55134	hypothetical protein			Random proteins (Hypothetical)	Random proteins (Hypothetical)	PM	0.818758607	38.0	0.0
BLAST Output	PCC 11901 Accession	Percentage Identity	Alignment Length	Mismatches	Gap Open	Synechocystis sp. PCC 6803 Start	Synechocystis sp. PCC 6803 End	PCC 11901 Start	PCC 11901 End	E-value	Bit Score
tr|Q55134|Q55134_SYNY3	WP_030007336.1	54.723	307	138	1	1	307	1	306	5.71e-128	366
tr|Q55134|Q55134_SYNY3	WP_138071472.1	35.385	65	35	2	205	269	277	334	0.001	37.0
tr|Q55134|Q55134_SYNY3	WP_065711271.1	33.058	121	64	7	114	230	189	296	0.001	37.0
tr|Q55134|Q55134_SYNY3	WP_138071062.1	35.385	65	36	1	191	255	328	386	0.002	35.8
tr|Q55134|Q55134_SYNY3	WP_030005953.1	29.293	99	59	3	189	284	263	353	0.003	35.4
tr|Q55134|Q55134_SYNY3	WP_138071066.1	23.392	171	114	4	69	225	126	293	0.040	32.0
tr|Q55134|Q55134_SYNY3	WP_138071414.1	30.667	75	36	3	167	237	247	309	0.10	30.8
sll0095	Q55884	hypothetical protein		spkL	Random proteins (Hypothetical)	Random proteins (Hypothetical)	PM	0.940064422	60.7	0.0
BLAST Output	PCC 11901 Accession	Percentage Identity	Alignment Length	Mismatches	Gap Open	Synechocystis sp. PCC 6803 Start	Synechocystis sp. PCC 6803 End	PCC 11901 Start	PCC 11901 End	E-value	Bit Score
sp|Q55884|Y095_SYNY3	WP_138071642.1	56.514	545	231	3	24	566	15	555	0.0	627
sp|Q55884|Y095_SYNY3	WP_138072430.1	40.952	525	287	10	45	562	70	578	2.16e-130	390
sp|Q55884|Y095_SYNY3	WP_138071551.1	37.321	418	254	3	21	435	33	445	6.27e-88	280
sp|Q55884|Y095_SYNY3	WP_138073488.1	32.524	412	272	3	25	435	47	453	3.56e-76	251
sp|Q55884|Y095_SYNY3	WP_012307258.1	27.747	537	362	9	31	553	13	537	2.41e-61	208
sp|Q55884|Y095_SYNY3	WP_138073193.1	24.044	183	116	6	329	495	118	293	0.15	31.2
sll0141	P74462	hypothetical protein			Random proteins (Hypothetical)	Random proteins (Hypothetical)	PM	0.937662762	51.0	0.0
BLAST Output	PCC 11901 Accession	Percentage Identity	Alignment Length	Mismatches	Gap Open	Synechocystis sp. PCC 6803 Start	Synechocystis sp. PCC 6803 End	PCC 11901 Start	PCC 11901 End	E-value	Bit Score
tr|P74462|P74462_SYNY3	WP_138073763.1	36.538	468	235	8	7	466	32	445	7.10e-71	228
tr|P74462|P74462_SYNY3	WP_138073258.1	25.383	457	291	13	12	450	21	445	9.91e-18	81.6
tr|P74462|P74462_SYNY3	WP_012308147.1	26.267	434	248	13	60	447	57	464	2.93e-16	77.4
tr|P74462|P74462_SYNY3	WP_138073275.1	25.116	430	273	14	48	454	41	444	2.55e-10	58.5
tr|P74462|P74462_SYNY3	WP_138073412.1	25.974	308	201	3	75	355	55	362	2.16e-08	52.4
tr|P74462|P74462_SYNY3	WP_012307188.1	25.991	227	149	6	238	446	173	398	2.97e-07	48.9
sll0160	Q55570	hypothetical protein			Random proteins (Hypothetical)	Random proteins (Hypothetical)	PM	0.920505929	25.7	5.0
BLAST Output	PCC 11901 Accession	Percentage Identity	Alignment Length	Mismatches	Gap Open	Synechocystis sp. PCC 6803 Start	Synechocystis sp. PCC 6803 End	PCC 11901 Start	PCC 11901 End	E-value	Bit Score
tr|Q55570|Q55570_SYNY3	WP_138073487.1	50.685	219	107	1	5	223	2	219	1.55e-63	194
tr|Q55570|Q55570_SYNY3	WP_138073607.1	35.556	45	20	2	82	121	176	216	0.61	27.3
tr|Q55570|Q55570_SYNY3	WP_138071941.1	28.814	59	32	2	173	221	182	240	0.99	26.9
sll0178	Q55359	hypothetical protein			Random proteins (Hypothetical)	Random proteins (Hypothetical)	PM	0.945739851	151.8	1.0
BLAST Output	PCC 11901 Accession	Percentage Identity	Alignment Length	Mismatches	Gap Open	Synechocystis sp. PCC 6803 Start	Synechocystis sp. PCC 6803 End	PCC 11901 Start	PCC 11901 End	E-value	Bit Score
sll0180	Q55776	hypothetical protein			Random proteins (Hypothetical)	Random proteins (Hypothetical)	PM	0.834916955	53.9	0.0
BLAST Output	PCC 11901 Accession	Percentage Identity	Alignment Length	Mismatches	Gap Open	Synechocystis sp. PCC 6803 Start	Synechocystis sp. PCC 6803 End	PCC 11901 Start	PCC 11901 End	E-value	Bit Score
tr|Q55776|Q55776_SYNY3	WP_012307188.1	32.495	477	242	8	10	482	13	413	1.61e-67	219
tr|Q55776|Q55776_SYNY3	WP_138073258.1	26.018	442	265	13	43	481	73	455	5.34e-13	67.4
tr|Q55776|Q55776_SYNY3	WP_138073763.1	26.888	331	210	14	150	468	116	426	4.97e-08	51.6
tr|Q55776|Q55776_SYNY3	WP_138073275.1	20.211	475	309	14	34	490	38	460	3.92e-05	42.4
tr|Q55776|Q55776_SYNY3	WP_138071087.1	25.714	140	96	2	178	311	262	399	0.018	33.9
tr|Q55776|Q55776_SYNY3	WP_138073093.1	26.667	165	98	6	56	199	151	313	0.043	32.3
tr|Q55776|Q55776_SYNY3	WP_138073078.1	25.410	122	79	2	139	258	461	572	0.16	31.2
tr|Q55776|Q55776_SYNY3	WP_138071762.1	26.271	118	68	4	225	335	146	251	0.75	28.5
sll0192	Q55704	hypothetical protein			Random proteins (Hypothetical)	Random proteins (Hypothetical)	PM	0.76707204	46.3	0.0
BLAST Output	PCC 11901 Accession	Percentage Identity	Alignment Length	Mismatches	Gap Open	Synechocystis sp. PCC 6803 Start	Synechocystis sp. PCC 6803 End	PCC 11901 Start	PCC 11901 End	E-value	Bit Score
tr|Q55704|Q55704_SYNY3	WP_138073492.1	50.000	418	196	5	4	418	2	409	6.77e-133	385
tr|Q55704|Q55704_SYNY3	WP_138073252.1	36.000	50	32	0	371	420	355	404	0.20	30.0
sll0260	P74409	hypothetical protein			Random proteins (Hypothetical)	Random proteins (Hypothetical)	PM	0.931734211	49.2	4.0
BLAST Output	PCC 11901 Accession	Percentage Identity	Alignment Length	Mismatches	Gap Open	Synechocystis sp. PCC 6803 Start	Synechocystis sp. PCC 6803 End	PCC 11901 Start	PCC 11901 End	E-value	Bit Score
sp|P74409|Y260_SYNY3	WP_138071990.1	59.903	414	166	0	20	433	18	431	2.24e-177	500
sp|P74409|Y260_SYNY3	WP_045441530.1	31.481	432	280	7	17	436	18	445	2.64e-63	209
sp|P74409|Y260_SYNY3	WP_045441961.1	24.571	350	240	4	6	345	22	357	3.93e-26	105
sp|P74409|Y260_SYNY3	WP_138073281.1	28.571	77	52	1	263	336	208	284	0.043	32.3
sp|P74409|Y260_SYNY3	WP_138072491.1	35.484	62	36	2	39	97	170	230	0.25	30.0
sll0283	Q55913	hypothetical protein			Random proteins (Hypothetical)	Random proteins (Hypothetical)	PM	0.90732588	47.5	4.0
BLAST Output	PCC 11901 Accession	Percentage Identity	Alignment Length	Mismatches	Gap Open	Synechocystis sp. PCC 6803 Start	Synechocystis sp. PCC 6803 End	PCC 11901 Start	PCC 11901 End	E-value	Bit Score
tr|Q55913|Q55913_SYNY3	WP_138071557.1	41.235	405	233	2	1	405	1	400	7.57e-96	290
tr|Q55913|Q55913_SYNY3	WP_138071756.1	23.256	43	33	0	362	404	4	46	0.31	29.6
tr|Q55913|Q55913_SYNY3	WP_138073915.1	43.478	23	13	0	358	380	236	258	0.36	29.3
tr|Q55913|Q55913_SYNY3	WP_138072885.1	37.838	37	18	2	375	410	217	249	0.56	28.9
sll0325	Q55634	hypothetical protein			Random proteins (Hypothetical)	Random proteins (Hypothetical)	PM	0.925601552	55.5	1.0
BLAST Output	PCC 11901 Accession	Percentage Identity	Alignment Length	Mismatches	Gap Open	Synechocystis sp. PCC 6803 Start	Synechocystis sp. PCC 6803 End	PCC 11901 Start	PCC 11901 End	E-value	Bit Score
tr|Q55634|Q55634_SYNY3	WP_084150025.1	48.276	493	241	7	10	496	4	488	4.28e-160	460
tr|Q55634|Q55634_SYNY3	WP_138072132.1	34.764	466	268	13	48	496	42	488	1.99e-80	255
tr|Q55634|Q55634_SYNY3	WP_138071412.1	32.759	58	26	2	77	134	179	223	0.081	31.6
tr|Q55634|Q55634_SYNY3	WP_138073345.1	29.310	58	36	2	323	375	113	170	0.72	28.1
sll0361	P74424	hypothetical protein			Random proteins (Hypothetical)	Random proteins (Hypothetical)	PM	0.893022126	17.2	0.0
BLAST Output	PCC 11901 Accession	Percentage Identity	Alignment Length	Mismatches	Gap Open	Synechocystis sp. PCC 6803 Start	Synechocystis sp. PCC 6803 End	PCC 11901 Start	PCC 11901 End	E-value	Bit Score
tr|P74424|P74424_SYNY3	WP_138072812.1	39.796	98	59	0	57	154	55	152	9.99e-14	61.6
sll0381	Q55744	hypothetical protein			Random proteins (Hypothetical)	Random proteins (Hypothetical)	PM	0.946053694	31.0	0.0
BLAST Output	PCC 11901 Accession	Percentage Identity	Alignment Length	Mismatches	Gap Open	Synechocystis sp. PCC 6803 Start	Synechocystis sp. PCC 6803 End	PCC 11901 Start	PCC 11901 End	E-value	Bit Score
tr|Q55744|Q55744_SYNY3	WP_030006955.1	47.826	23	12	0	79	101	94	116	0.78	27.3
tr|Q55744|Q55744_SYNY3	WP_138071877.1	42.857	28	16	0	30	57	110	137	0.86	27.3
sll0413	Q55114	hypothetical protein			Random proteins (Hypothetical)	Random proteins (Hypothetical)	PM	0.936959778	23.1	0.0
BLAST Output	PCC 11901 Accession	Percentage Identity	Alignment Length	Mismatches	Gap Open	Synechocystis sp. PCC 6803 Start	Synechocystis sp. PCC 6803 End	PCC 11901 Start	PCC 11901 End	E-value	Bit Score
tr|Q55114|Q55114_SYNY3	WP_012306959.1	48.958	192	98	0	16	207	20	211	5.14e-51	160
tr|Q55114|Q55114_SYNY3	WP_012306700.1	32.258	186	116	3	22	203	13	192	1.33e-17	74.3
sll0498	Q55491	hypothetical protein			Random proteins (Hypothetical)	Random proteins (Hypothetical)	PM	0.750136881	16.6	1.0
BLAST Output	PCC 11901 Accession	Percentage Identity	Alignment Length	Mismatches	Gap Open	Synechocystis sp. PCC 6803 Start	Synechocystis sp. PCC 6803 End	PCC 11901 Start	PCC 11901 End	E-value	Bit Score
tr|Q55491|Q55491_SYNY3	WP_012306125.1	34.807	181	84	6	1	148	1	180	1.64e-23	87.4
tr|Q55491|Q55491_SYNY3	WP_138073846.1	48.485	66	34	0	1	66	1	66	4.91e-10	53.1
tr|Q55491|Q55491_SYNY3	WP_138073665.1	34.783	69	40	2	2	66	13	80	4.17e-04	35.0
sll0505	Q55483	hypothetical protein			Random proteins (Hypothetical)	Random proteins (Hypothetical)	PM	0.941944166	33.6	2.0
BLAST Output	PCC 11901 Accession	Percentage Identity	Alignment Length	Mismatches	Gap Open	Synechocystis sp. PCC 6803 Start	Synechocystis sp. PCC 6803 End	PCC 11901 Start	PCC 11901 End	E-value	Bit Score
tr|Q55483|Q55483_SYNY3	WP_012305738.1	50.534	281	131	5	20	294	10	288	1.65e-81	245
tr|Q55483|Q55483_SYNY3	WP_045441586.1	40.000	30	18	0	12	41	21	50	0.60	27.7
tr|Q55483|Q55483_SYNY3	WP_030006122.1	22.047	127	64	2	108	199	10	136	0.95	26.9
sll0544	Q55399	hypothetical protein			Random proteins (Hypothetical)	Random proteins (Hypothetical)	PM	0.794018688	37.2	0.0
BLAST Output	PCC 11901 Accession	Percentage Identity	Alignment Length	Mismatches	Gap Open	Synechocystis sp. PCC 6803 Start	Synechocystis sp. PCC 6803 End	PCC 11901 Start	PCC 11901 End	E-value	Bit Score
tr|Q55399|Q55399_SYNY3	WP_138073325.1	52.905	327	153	1	1	327	1	326	6.15e-121	348
sll0565	P74742	hypothetical protein			Random proteins (Hypothetical)	Random proteins (Hypothetical)	PM	0.930997504	15.2	0.0
BLAST Output	PCC 11901 Accession	Percentage Identity	Alignment Length	Mismatches	Gap Open	Synechocystis sp. PCC 6803 Start	Synechocystis sp. PCC 6803 End	PCC 11901 Start	PCC 11901 End	E-value	Bit Score
tr|P74742|P74742_SYNY3	WP_138073374.1	32.500	120	66	5	12	131	4	108	2.72e-09	48.1
tr|P74742|P74742_SYNY3	WP_138071881.1	32.759	58	31	1	27	84	205	254	0.10	28.5
sll0602	Q55726	hypothetical protein			Random proteins (Hypothetical)	Random proteins (Hypothetical)	PM	0.939651258	77.7	1.0
BLAST Output	PCC 11901 Accession	Percentage Identity	Alignment Length	Mismatches	Gap Open	Synechocystis sp. PCC 6803 Start	Synechocystis sp. PCC 6803 End	PCC 11901 Start	PCC 11901 End	E-value	Bit Score
tr|Q55726|Q55726_SYNY3	WP_138073462.1	34.262	718	413	17	3	684	7	701	7.65e-113	353
tr|Q55726|Q55726_SYNY3	WP_138071614.1	32.206	562	334	15	33	568	7	547	9.94e-72	241
tr|Q55726|Q55726_SYNY3	WP_138071756.1	35.926	270	155	6	265	526	398	657	3.64e-38	147
tr|Q55726|Q55726_SYNY3	WP_168191165.1	28.444	225	145	5	297	521	32	240	1.36e-14	70.5
sll0606	Q55723	hypothetical protein			Random proteins (Hypothetical)	Random proteins (Hypothetical)	PM	0.92513442	50.6	1.0
BLAST Output	PCC 11901 Accession	Percentage Identity	Alignment Length	Mismatches	Gap Open	Synechocystis sp. PCC 6803 Start	Synechocystis sp. PCC 6803 End	PCC 11901 Start	PCC 11901 End	E-value	Bit Score
tr|Q55723|Q55723_SYNY3	WP_138071798.1	33.613	476	291	10	13	474	1	465	3.70e-77	245
tr|Q55723|Q55723_SYNY3	WP_138073483.1	29.412	153	104	2	120	269	34	185	8.20e-08	50.8
tr|Q55723|Q55723_SYNY3	WP_012306032.1	23.711	97	73	1	128	223	48	144	0.001	37.4
tr|Q55723|Q55723_SYNY3	WP_138071523.1	29.927	137	85	6	194	320	11	146	0.84	28.1
tr|Q55723|Q55723_SYNY3	WP_138072286.1	50.000	24	12	0	23	46	170	193	0.98	28.1
sll0727	P74642	hypothetical protein			Random proteins (Hypothetical)	Random proteins (Hypothetical)	PM	0.917261279	65.5	10.0
BLAST Output	PCC 11901 Accession	Percentage Identity	Alignment Length	Mismatches	Gap Open	Synechocystis sp. PCC 6803 Start	Synechocystis sp. PCC 6803 End	PCC 11901 Start	PCC 11901 End	E-value	Bit Score
tr|P74642|P74642_SYNY3	WP_138072984.1	32.923	568	357	13	12	575	1	548	9.19e-81	261
tr|P74642|P74642_SYNY3	WP_138072192.1	29.452	584	373	14	3	575	10	565	5.19e-63	214
sll0737	O06944	hypothetical protein			Random proteins (Hypothetical)	Random proteins (Hypothetical)	PM	0.93332554	96.6	12.0
BLAST Output	PCC 11901 Accession	Percentage Identity	Alignment Length	Mismatches	Gap Open	Synechocystis sp. PCC 6803 Start	Synechocystis sp. PCC 6803 End	PCC 11901 Start	PCC 11901 End	E-value	Bit Score
tr|O06944|O06944_SYNY3	WP_138073313.1	42.874	870	447	16	8	858	11	849	0.0	636
tr|O06944|O06944_SYNY3	WP_138072523.1	27.154	766	455	20	23	745	10	715	1.21e-36	145
tr|O06944|O06944_SYNY3	WP_138073746.1	29.134	127	71	7	533	653	243	356	0.66	29.6
tr|O06944|O06944_SYNY3	WP_138073584.1	48.148	27	14	0	649	675	324	350	0.98	29.3
sll0749	Q55631	hypothetical protein		sll0749	Random proteins (Hypothetical)	Random proteins (Hypothetical)	PM	0.930222856	21.2	0.0
BLAST Output	PCC 11901 Accession	Percentage Identity	Alignment Length	Mismatches	Gap Open	Synechocystis sp. PCC 6803 Start	Synechocystis sp. PCC 6803 End	PCC 11901 Start	PCC 11901 End	E-value	Bit Score
tr|Q55631|Q55631_SYNY3	WP_181445692.1	47.651	149	74	3	49	194	22	169	2.45e-35	119
sll0752	Q55627	hypothetical protein		sll0752	Random proteins (Hypothetical)	Random proteins (Hypothetical)	PM	0.926094894	31.4	0.0
BLAST Output	PCC 11901 Accession	Percentage Identity	Alignment Length	Mismatches	Gap Open	Synechocystis sp. PCC 6803 Start	Synechocystis sp. PCC 6803 End	PCC 11901 Start	PCC 11901 End	E-value	Bit Score
tr|Q55627|Q55627_SYNY3	WP_012308313.1	31.373	255	150	4	2	256	161	390	9.44e-30	113
tr|Q55627|Q55627_SYNY3	WP_138072357.1	35.897	39	25	0	186	224	364	402	0.087	30.4
tr|Q55627|Q55627_SYNY3	WP_138073440.1	29.730	74	50	2	104	175	91	164	0.088	30.8
sll0827	Q55425	hypothetical protein			Random proteins (Hypothetical)	Random proteins (Hypothetical)	PM	0.936576091	58.1	1.0
BLAST Output	PCC 11901 Accession	Percentage Identity	Alignment Length	Mismatches	Gap Open	Synechocystis sp. PCC 6803 Start	Synechocystis sp. PCC 6803 End	PCC 11901 Start	PCC 11901 End	E-value	Bit Score
tr|Q55425|Q55425_SYNY3	WP_138071400.1	45.029	513	262	2	2	494	5	517	1.08e-142	417
tr|Q55425|Q55425_SYNY3	WP_062431589.1	26.667	60	44	0	198	257	66	125	0.97	28.1
sll0832	Q55417	hypothetical protein			Random proteins (Hypothetical)	Random proteins (Hypothetical)	PM	0.820355285	17.1	0.0
BLAST Output	PCC 11901 Accession	Percentage Identity	Alignment Length	Mismatches	Gap Open	Synechocystis sp. PCC 6803 Start	Synechocystis sp. PCC 6803 End	PCC 11901 Start	PCC 11901 End	E-value	Bit Score
tr|Q55417|Q55417_SYNY3	WP_138073383.1	61.719	128	49	0	18	145	4	131	3.40e-56	169
tr|Q55417|Q55417_SYNY3	WP_138071720.1	34.286	35	22	1	43	76	78	112	0.085	29.3
tr|Q55417|Q55417_SYNY3	WP_138073040.1	27.143	70	39	2	52	119	124	183	0.16	28.1
tr|Q55417|Q55417_SYNY3	WP_012305928.1	40.741	27	16	0	56	82	50	76	0.44	26.9
sll0839	P73760	hypothetical protein			Random proteins (Hypothetical)	Random proteins (Hypothetical)	PM	0.849872074	21.6	1.0
BLAST Output	PCC 11901 Accession	Percentage Identity	Alignment Length	Mismatches	Gap Open	Synechocystis sp. PCC 6803 Start	Synechocystis sp. PCC 6803 End	PCC 11901 Start	PCC 11901 End	E-value	Bit Score
tr|P73760|P73760_SYNY3	WP_071884912.1	39.665	179	95	3	18	191	3	173	4.19e-41	134
tr|P73760|P73760_SYNY3	WP_138073084.1	41.026	39	23	0	146	184	88	126	0.24	28.5
[truncated: 12,890 more rows]

## Sheet: Key
Amino acid biosynthesis
Biosynthesis of cofactors, prosthetic groups, and carriers
Cell Envelope
Cellular Processes
Central Intermediary Metabolism
DNA replication, restriction, modification, recombination, and repair
Energy Metabolism
Fatty acid, phospholipid and sterol metabolism
Other Categories
Photosynthesis & Respiration
Purines, pyrimidines, nucleosides, and nucleotides
Random proteins (Hypothetical)
Regulatory Functions
Transcription / Translation
Transport & Binding Proteins
Unknown Proteins
