# Supplementary material for: Development of a Biotechnology Platform for the Fast-Growing Cyanobacterium Synechococcus sp. PCC 11901
Source: Biomolecules. 2022 Jun 23;12(7):872. doi: 10.3390/biom12070872 (PMC9313322; doi:10.3390/biom12070872)
Supplement: Supplementary file 1 [file biomolecules-12-00872-s001.zip › Table S5.xlsx]

## Sheet: Output
Table S5: PCC 11910 proteins with no homologues in PCC 6803.
NCBI ID	Uniprot ID	Name	Length (aa)	Calculated mol wt	Date Added to NCBI
WP_138073106.1		hypothetical protein	212	22434	27-MAY-2019
WP_030006630.1	A0A4P8X2D9	hypothetical protein	161	17634	24-SEP-2019
WP_138071910.1		glycerophosphodiester phosphodiesterase	295	33719	17-OCT-2019
WP_012308299.1	A0A4P8WYW6	YggT family protein	143	16181	03-AUG-2021
WP_138071331.1		DUF4115 domain-containing protein	277	30796	04-AUG-2021
WP_138071081.1		hypothetical protein	114	13189	27-MAY-2019
WP_138071268.1		hypothetical protein	72	8204	27-MAY-2019
WP_045441750.1		hypothetical protein	145	15769	20-SEP-2021
WP_138072381.1		oligosaccharide flippase family protein	479	53434	26-JUL-2021
WP_138073205.1		hypothetical protein	148	16737	30-OCT-2019
WP_138073076.1		hypothetical protein	130	14885	27-MAY-2019
WP_156785474.1		hypothetical protein	48	5686	21-DEC-2019
WP_138073139.1		hypothetical protein	172	20227	27-MAY-2019
WP_138073354.1		hypothetical protein	181	20862	27-MAY-2019
WP_030007142.1	A0A4P8X6A6	hypothetical protein	120	13116	24-SEP-2019
WP_138071109.1		hypothetical protein	59	5859	18-DEC-2019
WP_138071514.1		YadA C-terminal domain-containing protein	264	26474	10-FEB-2020
WP_138071869.1		fatty acid desaturase	237	27763	02-AUG-2021
WP_065710594.1	A0A4P8X0F7	TIGR03792 family protein	132	14691	24-SEP-2019
WP_138071462.1		hypothetical protein	114	12022	27-MAY-2019
WP_012307908.1	A0A4P8X5F5	PIN domain-containing protein	135	15389	24-SEP-2019
WP_156785464.1		hypothetical protein	48	5327	21-DEC-2019
WP_030008136.1		rod shape-determining protein MreD	171	19392	20-DEC-2021
WP_065717491.1	A0A4P8X156	hypothetical protein	85	9484	24-SEP-2019
WP_138073444.1		hypothetical protein	258	25732	27-MAY-2019
WP_181445661.1		metal ABC transporter ATPase	181	19823	02-AUG-2020
WP_138073873.1		hypothetical protein	116	12690	27-MAY-2019
WP_065711449.1	A0A4P8WYX5	CDGSH iron-sulfur domain-containing protein	78	8507	20-MAY-2021
WP_138071224.1		hypothetical protein	226	25810	27-MAY-2019
WP_168191079.1		hypothetical protein	50	5394	13-APR-2020
WP_168191115.1		hypothetical protein	57	6628	13-APR-2020
WP_138073454.1		hypothetical protein	114	12541	27-MAY-2019
WP_062436206.1	A0A4P8WX44	FHA domain-containing protein	175	18914	25-JUL-2021
WP_138072726.1		hypothetical protein	154	16850	27-MAY-2019
WP_138071208.1		hypothetical protein	136	15238	27-MAY-2019
WP_138072140.1		hypothetical protein	144	16343	27-MAY-2019
WP_138073691.1		SH3 domain-containing protein	201	21893	17-OCT-2019
WP_012307983.1	A0A4P8WZ18	hypothetical protein	66	7397	24-SEP-2019
WP_138073603.1		hypothetical protein	364	42217	27-MAY-2019
WP_138071865.1		endonuclease domain-containing protein	128	14972	02-JUN-2021
WP_030007367.1	A0A4P8X2M5	MgtC/SapB family protein	424	45522	24-SEP-2019
WP_012306141.1	A0A4P8X1C1	hypothetical protein	101	11930	24-SEP-2019
WP_168191082.1		hypothetical protein	46	4893	13-APR-2020
WP_138071203.1		hypothetical protein	185	21274	27-MAY-2019
WP_138073070.1		hypothetical protein	284	31284	27-MAY-2019
WP_138071706.1		hypothetical protein	114	12608	27-MAY-2019
WP_138073634.1		hypothetical protein	192	18584	27-MAY-2019
WP_030008031.1	A0A4P8WVP5	hypothetical protein	74	8093	24-SEP-2019
WP_138071047.1		hypothetical protein	173	18553	27-MAY-2019
WP_138073819.1		lipopolysaccharide assembly protein LapA domain-containing protein	153	16539	04-AUG-2021
WP_138073271.1		hypothetical protein	300	32551	18-DEC-2019
WP_138071999.1		hypothetical protein	113	11739	27-MAY-2019
WP_012307905.1	A0A4P8X366	hypothetical protein	78	8646	24-SEP-2019
WP_138071250.1		hypothetical protein	154	17478	27-MAY-2019
WP_062434141.1	A0A4P8X347	rod shape-determining protein MreC	266	29327	24-SEP-2019
WP_138073647.1		hypothetical protein	200	21932	27-MAY-2019
WP_138071179.1		hypothetical protein	216	24008	27-MAY-2019
WP_138072539.1		acireductone synthase	228	25341	06-OCT-2019
WP_138073694.1		spermidine synthase	314	34690	27-MAY-2019
WP_138072982.1		serine/threonine protein kinase	223	25527	27-MAY-2019
WP_138072262.1		hypothetical protein	470	53037	27-MAY-2019
WP_138072080.1		GFA family protein	128	14594	17-OCT-2019
WP_168191093.1		hypothetical protein	45	4707	13-APR-2020
WP_138071800.1		hypothetical protein	76	8315	27-MAY-2019
WP_052349605.1		type II site-specific deoxyribonuclease	317	35698	20-DEC-2021
WP_138072404.1		hypothetical protein	253	28677	27-MAY-2019
WP_138073769.1		ABC transporter permease subunit	489	53576	30-JUL-2021
WP_168191112.1		hypothetical protein	51	5563	13-APR-2020
WP_030007329.1	A0A4P8X325	hypothetical protein	131	14454	24-SEP-2019
WP_138071315.1		DUF5331 domain-containing protein	148	17169	17-AUG-2021
WP_168191096.1		hypothetical protein	47	5162	13-APR-2020
WP_041443433.1	A0A4P8X053	hypothetical protein	74	8617	24-SEP-2019
WP_030006891.1	A0A4P8WWB8	hypothetical protein	95	10775	24-SEP-2019
WP_138072839.1		hypothetical protein	173	20096	27-MAY-2019
WP_138072712.1		PH domain-containing protein	164	18505	04-OCT-2021
WP_138073681.1		DUF6208 family protein	317	36445	17-AUG-2021
WP_138071957.1		cobalamin-binding protein	309	34299	17-OCT-2019
WP_138071684.1		hypothetical protein	153	16774	27-MAY-2019
WP_062431951.1		ChaB family protein	273	29059	17-APR-2020
WP_138072280.1		hypothetical protein	258	30174	27-MAY-2019
WP_030007410.1	A0A4P8WX03	hypothetical protein	72	7920	24-SEP-2019
WP_138071264.1		hypothetical protein	137	15544	27-MAY-2019
WP_168191087.1		hypothetical protein	49	5178	13-APR-2020
WP_138073706.1		hypothetical protein	78	8482	27-MAY-2019
WP_168191099.1		hypothetical protein	56	6383	13-APR-2020
WP_168191088.1		hypothetical protein	58	6005	13-APR-2020
WP_138073046.1		hypothetical protein	207	23453	27-MAY-2019
WP_138071007.1		hypothetical protein	90	8956	27-MAY-2019
WP_138071037.1		hypothetical protein	173	19368	27-MAY-2019
WP_138071388.1		hypothetical protein	265	29918	27-MAY-2019
WP_138071630.1		hypothetical protein	339	35354	27-MAY-2019
WP_065711458.1	A0A4V1G1E3	hypothetical protein	146	16717	24-SEP-2019
WP_138073458.1		hypothetical protein	163	18900	27-MAY-2019
WP_062431533.1	A0A4P8X2P4	hypothetical protein	100	11101	24-SEP-2019
WP_138071702.1		DUF4926 domain-containing protein	98	11489	29-JUL-2021
WP_168191090.1		hypothetical protein	50	5653	13-APR-2020
WP_138073082.1		hypothetical protein	154	17414	27-MAY-2019
WP_041443595.1	A0A4P8X5B6	DUF5340 domain-containing protein	82	9534	02-DEC-2019
WP_030006254.1	A0A4P8X0H9	LOG family protein	239	26431	24-SEP-2019
WP_138073925.1		2'-5' RNA ligase family protein	175	19937	17-OCT-2019
WP_099240448.1		cytochrome b6-f complex subunit PetL	31	3034	09-AUG-2021
WP_138073066.1		hypothetical protein	274	31015	27-MAY-2019
WP_138071051.1		hypothetical protein	238	25861	27-MAY-2019
WP_062434788.1	A0A4P8X5P3	DMT family transporter	281	30670	24-SEP-2019
WP_168191139.1		hypothetical protein	46	5055	14-JUN-2020
WP_030006880.1	A0A4P8X1D4	hypothetical protein	104	11120	24-SEP-2019
WP_138072509.1		hypothetical protein	127	14481	27-MAY-2019
WP_138072464.1		DUF4870 domain-containing protein	116	12591	17-OCT-2019
WP_030006452.1	A0A4P8X7B5	DUF3155 domain-containing protein	109	12324	10-JAN-2020
WP_181445669.1		hypothetical protein	292	30727	02-AUG-2020
WP_065710313.1	A0A4P8WZH6	addiction module protein	71	8182	24-SEP-2019
WP_138071895.1		DUF1176 domain-containing protein	236	26324	25-JUL-2021
WP_168191101.1		hypothetical protein	50	5536	13-APR-2020
WP_138071628.1		hypothetical protein	194	19503	27-MAY-2019
WP_065710934.1	A0A4P8X253	NERD domain-containing protein	221	24527	24-SEP-2019
WP_168191143.1		tetratricopeptide repeat protein	321	35193	13-APR-2020
WP_138071056.1		zinc ribbon domain-containing protein	157	17556	30-JUL-2021
WP_138071812.1		hypothetical protein	74	8218	27-MAY-2019
WP_138073449.1		hypothetical protein	97	11196	27-MAY-2019
WP_012308359.1		hypothetical protein	46	5140	14-JUN-2020
WP_138073222.1		DUF6391 domain-containing protein	205	22533	09-AUG-2021
WP_138071167.1		multicopper oxidase domain-containing protein	164	18938	27-JUL-2021
WP_030006316.1	A0A4P8X2E1	hypothetical protein	79	8114	24-SEP-2019
WP_138071987.1		hypothetical protein	165	18823	27-MAY-2019
WP_168191175.1		tryptophan-rich sensory protein	264	28949	04-AUG-2021
WP_062435128.1	A0A4P8X2K7	OsmC family protein	146	15632	03-AUG-2021
WP_138073716.1		hypothetical protein	455	50582	27-MAY-2019
WP_099240695.1		hypothetical protein	63	6911	25-SEP-2019
WP_012307238.1	A0A4P8X116	hypothetical protein	79	8641	24-SEP-2019
WP_138073398.1		DUF4087 domain-containing protein	195	20700	17-OCT-2019
WP_138073090.1		DUF4333 domain-containing protein	189	19706	17-OCT-2019
WP_138071456.1		DCC1-like thiol-disulfide oxidoreductase family protein	133	15384	04-AUG-2021
WP_138073137.1		XRE family transcriptional regulator	106	11621	07-JAN-2020
WP_138072653.1		hypothetical protein	70	7979	27-MAY-2019
WP_138072216.1		SAM-dependent chlorinase/fluorinase	262	28082	17-OCT-2019
WP_012305700.1	A0A4P8X2T0	hypothetical protein	69	7550	24-SEP-2019
WP_138072841.1		hypothetical protein	93	10430	27-MAY-2019
WP_138073697.1		hypothetical protein	85	9817	27-MAY-2019
WP_138072820.1		hypothetical protein	333	34886	27-MAY-2019
WP_138071230.1		hypothetical protein	86	9605	27-MAY-2019
WP_138073250.1		hypothetical protein	80	8780	27-MAY-2019
WP_138072278.1		hypothetical protein	60	6676	27-MAY-2019
WP_138073518.1		DUF72 domain-containing protein	286	32986	18-MAY-2021
WP_030007419.1	A0A4P8WWZ4	hypothetical protein	69	7803	24-SEP-2019
WP_138071039.1		hypothetical protein	114	12970	27-MAY-2019
WP_181445660.1		hypothetical protein	108	12114	02-AUG-2020
WP_138073416.1		hypothetical protein	168	17517	27-MAY-2019
WP_138071732.1		hypothetical protein	472	54595	27-MAY-2019
WP_030007508.1	A0A4P8X1I7	hypothetical protein	174	18830	21-JUN-2021
WP_138073608.1		hypothetical protein	99	10500	27-MAY-2019
WP_045442528.1		VOC family protein	121	12602	21-JUL-2021
WP_138071424.1		flippase	445	50051	16-OCT-2019
WP_138071011.1		hypothetical protein	171	17728	27-MAY-2019
WP_138073413.1		hypothetical protein	260	29271	27-MAY-2019
WP_012307526.1	A0A4P8X1V9	PipX family protein	89	10579	16-DEC-2019
WP_138073923.1		hypothetical protein	414	46772	27-MAY-2019
WP_030006632.1	A0A4V1G1Z9	hypothetical protein	93	10960	24-SEP-2019
WP_138071738.1		hypothetical protein	405	44324	27-MAY-2019
WP_030006265.1	A0A4V1G1R2	hypothetical protein	177	18281	24-SEP-2019
WP_157072221.1		hypothetical protein	45	5171	21-DEC-2019
WP_030005944.1	A0A4P8X1U6	cation transporter	205	21981	23-NOV-2021
WP_065710900.1		hypothetical protein	162	18868	18-DEC-2019
WP_138073772.1		NADP-dependent isocitrate dehydrogenase	745	80645	12-OCT-2019
WP_012305634.1	A0A4P8X3A2	hypothetical protein	309	33121	24-SEP-2019
WP_138071794.1		YchJ family protein	167	18672	11-OCT-2019
WP_062431691.1	A0A4P8WZJ2	hypothetical protein	93	9471	24-SEP-2019
WP_138071043.1		hypothetical protein	122	13537	27-MAY-2019
WP_138071361.1		MBOAT family protein	500	56935	17-OCT-2019
WP_030008262.1	A0A4P8WVX7	hypothetical protein	68	7667	24-SEP-2019
WP_181445683.1		DUF6282 family protein	320	34632	30-AUG-2021
WP_138071535.1		hypothetical protein	422	42737	27-MAY-2019
WP_138073550.1		DUF423 domain-containing protein	126	12956	17-APR-2020
WP_138072863.1		hypothetical protein	114	12624	27-MAY-2019
WP_138071183.1		hypothetical protein	85	8524	27-MAY-2019
WP_012307682.1	A0A4P8X237	DUF2103 domain-containing protein	95	10280	16-AUG-2021
WP_143596762.1		hypothetical protein	61	6532	15-APR-2020
WP_138071448.1		thioredoxin domain-containing protein	680	76493	16-OCT-2019
WP_138071240.1		type II toxin-antitoxin system RelE/ParE family toxin	94	10735	17-OCT-2019
WP_012305623.1	A0A4V1G240	AtpZ/AtpI family protein	99	11510	26-JUL-2021
WP_138073671.1		type I restriction endonuclease	142	16731	01-MAR-2022
WP_138073573.1		DUF924 domain-containing protein	193	22207	16-OCT-2019
WP_138071181.1		hypothetical protein	94	9813	27-MAY-2019
WP_138073326.1		hypothetical protein	96	10252	27-MAY-2019
WP_138071246.1		hypothetical protein	76	8721	27-MAY-2019
WP_138071023.1		helix-turn-helix domain-containing protein	121	14066	24-JUL-2021
WP_012307592.1	A0A4P8X203	YajQ family cyclic di-GMP-binding protein	163	18112	24-SEP-2019
WP_138071605.1		hypothetical protein	162	17835	27-MAY-2019
WP_030007117.1	A0A4P8WYK1	hypothetical protein	74	8199	24-SEP-2019
WP_071932263.1	A0A4P8X413	DUF2256 domain-containing protein	49	5902	24-SEP-2019
WP_168191125.1		hypothetical protein	47	4911	18-JAN-2021
WP_138072274.1		type II toxin-antitoxin system RelE/ParE family toxin	109	12529	17-OCT-2019
WP_138073339.1		hypothetical protein	240	27355	27-MAY-2019
WP_099240828.1		hypothetical protein	63	7182	25-SEP-2019
WP_062435303.1	A0A4P8X2D8	DUF11 domain-containing protein	185	20026	11-JAN-2020
WP_138071035.1		hypothetical protein	69	8242	27-MAY-2019
WP_168191100.1		hypothetical protein	336	38230	13-APR-2020
WP_030007420.1	A0A4V1G1D5	type II toxin-antitoxin system RelE/ParE family toxin	86	9767	24-SEP-2019
WP_062435882.1	A0A4P8WWI6	hypothetical protein	243	26859	24-SEP-2019
WP_030006855.1	A0A4P8X379	hypothetical protein	64	7063	09-AUG-2021
WP_138073377.1		type II toxin-antitoxin system HicA family toxin	73	8370	17-OCT-2019
WP_138071599.1		hypothetical protein	819	90673	27-MAY-2019
WP_168191098.1		hypothetical protein	54	6117	13-APR-2020
WP_138073441.1		hypothetical protein	122	13500	27-MAY-2019
WP_138073778.1		hypothetical protein	116	12697	27-MAY-2019
WP_138073333.1		hypothetical protein	154	16020	27-MAY-2019
WP_181445656.1		phosphoadenosine phosphosulfate reductase	194	22418	02-AUG-2020
WP_138072375.1		polysaccharide deacetylase family protein	465	54290	22-MAY-2021
WP_138073131.1		hypothetical protein	59	6093	27-MAY-2019
WP_138073881.1		zinc ribbon domain-containing protein	161	18053	30-JUL-2021
WP_012308130.1	A0A4P8X1T1	hypothetical protein	105	12043	24-SEP-2019
WP_138071236.1		MarR family transcriptional regulator	162	18332	17-OCT-2019
WP_065709846.1	A0A4P8WXP8	TIGR03643 family protein	85	10185	24-SEP-2019
WP_138073430.1		LCCL domain-containing protein	151	15694	28-FEB-2022
WP_138073234.1		hypothetical protein	101	10485	27-MAY-2019
WP_138071926.1		hypothetical protein	86	9191	18-DEC-2019
WP_138073448.1		hypothetical protein	69	7419	27-MAY-2019
WP_065715818.1	A0A4P8WY41	hypothetical protein	128	14443	24-SEP-2019
WP_138073188.1		HEPN domain-containing protein	126	14495	30-JUL-2021
WP_062436890.1	A0A4P8WVU9	hypothetical protein	99	11589	06-OCT-2021
WP_168191156.1		hypothetical protein	45	5302	13-APR-2020
WP_138071009.1		hypothetical protein	450	50063	27-MAY-2019
WP_138073614.1		keratin	183	19257	27-MAY-2019
WP_030007062.1	A0A4P8WYE6	hypothetical protein	83	9860	24-SEP-2019
WP_138073179.1		hypothetical protein	254	28670	27-MAY-2019
WP_030008230.1	A0A4P8WX65	hypothetical protein	66	7486	24-SEP-2019
WP_138071177.1		DNA/RNA non-specific endonuclease	111	12724	20-MAY-2021
WP_138071101.1		hypothetical protein	125	13823	27-MAY-2019
WP_138072186.1		SagB/ThcOx family dehydrogenase	505	56914	17-OCT-2019
WP_030006002.1		hypothetical protein	95	10601	20-SEP-2021
WP_168191174.1		hypothetical protein	98	10008	13-APR-2020
WP_138073109.1		PIN domain-containing protein	135	15235	26-JUL-2021
WP_138073919.1		hypothetical protein	206	22475	27-MAY-2019
WP_138073442.1		hypothetical protein	322	34908	27-MAY-2019
WP_173867233.1		DUF805 domain-containing protein	125	14131	21-MAY-2021
WP_168191085.1		hypothetical protein	56	6491	13-APR-2020
WP_138071185.1		hypothetical protein	183	21117	27-MAY-2019
WP_138072013.1		hypothetical protein	303	33850	27-MAY-2019
WP_138072377.1		GNAT family N-acetyltransferase	321	37491	17-OCT-2019
WP_138072947.1		(2Fe-2S) ferredoxin domain-containing protein	119	12793	17-OCT-2019
WP_138071420.1		alkene reductase	366	40105	17-OCT-2019
WP_168191084.1		hypothetical protein	50	5520	13-APR-2020
WP_012305911.1	A0A4P8WZX8	hypothetical protein	66	7210	24-SEP-2019
WP_138073686.1		hypothetical protein	263	28196	27-MAY-2019
WP_138073569.1		hypothetical protein	141	16046	27-MAY-2019
WP_138071206.1		type II toxin-antitoxin system RelE/ParE family toxin	86	10150	19-MAY-2021
WP_012306878.1	A0A4P8X0A6	hypothetical protein	115	13112	24-SEP-2019
WP_138071852.1		BrnA antitoxin family protein	91	10275	30-JUL-2021
WP_012308275.1		hypothetical protein	137	15141	24-SEP-2019
WP_138072331.1		hypothetical protein	66	7113	27-MAY-2019
WP_138071140.1		hypothetical protein	109	12851	27-MAY-2019
WP_168191111.1		hypothetical protein	54	5819	13-APR-2020
WP_138073180.1		hypothetical protein	225	26216	27-MAY-2019
WP_138073837.1		YgiT-type zinc finger protein	79	9047	04-OCT-2019
WP_138073765.1		isochorismatase	343	37897	27-MAY-2019
WP_030007469.1	A0A4P8X348	hypothetical protein	173	18822	09-AUG-2021
WP_138071484.1		type II toxin-antitoxin system death-on-curing family toxin	128	14042	01-MAR-2022
WP_138071991.1		hypothetical protein	322	35522	27-MAY-2019
WP_138072484.1		transposase	194	23037	29-APR-2020
WP_030007512.1	A0A4P8X496	hypothetical protein	105	12168	24-SEP-2019
WP_138071674.1		hypothetical protein	188	20708	27-MAY-2019
WP_138071193.1		hypothetical protein	95	10692	27-MAY-2019
WP_030008056.1	A0A4P8WXI6	nitrate/nitrite transporter NrtS2	92	10040	10-FEB-2020
WP_062437165.1	A0A4P8X9B2	F0F1 ATP synthase subunit epsilon	129	13902	20-DEC-2021
WP_138073631.1		DUF11 domain-containing protein	512	54669	24-JUL-2021
WP_012306071.1		hypothetical protein	45	4564	14-JUN-2020
WP_065711970.1	A0A4P8X0S0	hypothetical protein	113	13082	24-SEP-2019
WP_138072976.1		LCCL domain-containing protein	266	27430	28-FEB-2022
WP_138072284.1		putative selenate ABC transporter substrate-binding protein	310	33714	04-OCT-2019
WP_138073363.1		hypothetical protein	140	14973	27-MAY-2019
WP_138071105.1		copper resistance protein B	279	30986	17-OCT-2019
WP_012305846.1	A0A4P8WXW4	D-aminoacyl-tRNA deacylase	151	16690	13-DEC-2021
WP_138071152.1		hypothetical protein	95	9875	30-OCT-2019
WP_012307064.1	A0A4P8X2X3	hypothetical protein	120	12576	24-SEP-2019
WP_168191149.1		hypothetical protein	58	6333	13-APR-2020
WP_062435044.1	A0A4P8X258	hypothetical protein	418	47778	24-SEP-2019
WP_157094586.1		hypothetical protein	47	5018	13-APR-2020
WP_138073268.1		hypothetical protein	159	15960	27-MAY-2019
WP_065716088.1	A0A4P8WZB9	hypothetical protein	59	7000	24-SEP-2019
WP_138073877.1		MFS transporter	405	45309	24-JUL-2021
WP_099239989.1		hypothetical protein	125	13116	25-SEP-2019
WP_138072276.1		helix-turn-helix domain-containing protein	98	10684	16-MAY-2021
WP_168191095.1		hypothetical protein	170	18495	13-APR-2020
WP_065710003.1	A0A4P8X058	DUF1828 domain-containing protein	263	30508	29-JUL-2021
WP_138072918.1		hypothetical protein	235	25137	27-MAY-2019
WP_030006482.1	A0A4P8X2G8	hypothetical protein	103	12028	24-SEP-2019
WP_138071136.1		hypothetical protein	76	8794	18-DEC-2020
WP_168191145.1		hypothetical protein	47	5192	13-APR-2020
WP_138073178.1		hypothetical protein	910	99616	27-MAY-2019
WP_138071730.1		hypothetical protein	142	14751	27-MAY-2019
WP_012308273.1	A0A4P8X266	hypothetical protein	159	15978	24-SEP-2019
WP_012308158.1	A0A4P8X1V8	metallothionein	56	5621	18-MAY-2020
WP_138071985.1		bifunctional hydroxymethylpyrimidine kinase/phosphomethylpyrimidine kinase	267	27453	10-OCT-2019
WP_138071490.1		pyridoxamine 5'-phosphate oxidase family protein	180	20018	17-OCT-2019
WP_138071603.1		TIGR02466 family protein	196	22135	18-OCT-2021
WP_138073111.1		hypothetical protein	191	22041	27-MAY-2019
WP_138073534.1		oligosaccharide flippase family protein	445	49242	30-JUL-2021
WP_065717093.1	A0A4P8WZM0	hypothetical protein	373	40558	24-SEP-2019
WP_138071317.1		DUF5331 domain-containing protein	119	13136	02-DEC-2019
WP_030008055.1	A0A4P8WXF2	nitrate/nitrite transporter NrtS1	84	9245	10-FEB-2020
WP_138071555.1		hypothetical protein	74	8150	09-JUL-2021
WP_065710238.1	A0A4P8X1X4	hypothetical protein	73	8276	20-DEC-2021
WP_138071083.1		hypothetical protein	65	7103	27-MAY-2019
WP_012306314.1	A0A4P8WZH0	RimK/LysX family protein	152	17509	21-JUL-2021
WP_138071276.1		hypothetical protein	268	29694	27-MAY-2019
WP_138071001.1		hypothetical protein	61	6593	18-DEC-2019
WP_138071700.1		hypothetical protein	112	12636	27-MAY-2019
WP_138073447.1		hypothetical protein	154	18446	27-MAY-2019
WP_138071474.1		hypothetical protein	59	6565	27-MAY-2019
WP_138071964.1		class I fructose-bisphosphate aldolase	360	39009	06-OCT-2019
WP_138073233.1		hypothetical protein	923	104685	27-MAY-2019
WP_012308025.1	A0A4P8WZ54	hypothetical protein	66	7030	24-SEP-2019
WP_030007089.1	A0A4P8WYJ9	hypothetical protein	80	8661	24-SEP-2019
WP_181445649.1		PepSY domain-containing protein	91	10533	02-AUG-2020
WP_138072942.1		DUF2513 domain-containing protein	113	13066	07-JAN-2020
WP_012308339.1		GIY-YIG nuclease family protein	104	12198	09-AUG-2021
WP_030007843.1	A0A4P8WZN3	DUF502 domain-containing protein	254	28077	24-SEP-2019
WP_168191080.1		hypothetical protein	51	5707	13-APR-2020
WP_041443564.1	A0A4P8X351	manganese efflux pump	187	19678	21-JUL-2021
WP_012307591.1	A0A4V1G1Y7	MAPEG family protein	144	15586	26-JUL-2021
WP_138071272.1		hypothetical protein	195	21941	27-MAY-2019
WP_138073294.1		hypothetical protein	298	34468	27-MAY-2019
WP_168191104.1		helix-turn-helix domain-containing protein	150	16980	30-JUL-2021
WP_138072529.1		hypothetical protein	111	12468	27-MAY-2019
WP_138073329.1		hypothetical protein	66	6554	27-MAY-2019
WP_138071260.1		hypothetical protein	191	22194	27-MAY-2019
WP_138071478.1		hypothetical protein	114	12680	27-MAY-2019
WP_065710792.1	A0A4P8X3Z8	DUF5132 domain-containing protein	100	10184	03-AUG-2021
WP_030006814.1	A0A4P8X080	hypothetical protein	76	8907	24-SEP-2019
WP_138072017.1		hypothetical protein	166	18461	27-MAY-2019
WP_138071920.1		hypothetical protein	559	61913	27-MAY-2019
WP_138073594.1		hypothetical protein	84	9333	27-MAY-2019
WP_138073748.1		winged helix-turn-helix domain-containing protein	53	5929	29-JUL-2021
WP_138071045.1		hypothetical protein	404	45120	27-MAY-2019
WP_065711921.1	A0A4V1G244	acetyltransferase	199	23248	24-SEP-2019
WP_138072849.1		Txe/YoeB family addiction module toxin	85	9956	07-OCT-2019
WP_138073470.1		hypothetical protein	252	28557	27-MAY-2019
WP_030008032.1	A0A4P8WVR2	type II toxin-antitoxin system death-on-curing family toxin	130	14224	28-FEB-2022
WP_012307736.1		hypothetical protein	48	5252	18-DEC-2019
WP_138071908.1		hypothetical protein	148	16366	27-MAY-2019
WP_138071171.1		hypothetical protein	151	17217	27-MAY-2019
WP_138071173.1		copper resistance protein B	34	3767	30-JUL-2021
WP_138073610.1		nucleotidyltransferase domain-containing protein	127	14562	17-OCT-2019
WP_168191086.1		hypothetical protein	139	14546	13-APR-2020
WP_138073888.1		DUF2892 domain-containing protein	65	6784	17-OCT-2019
WP_168191083.1		hypothetical protein	107		13-APR-2020
WP_138073920.1		DUF4360 domain-containing protein	208	22165	17-OCT-2019
WP_012306772.1	A0A4P8X0K1	hypothetical protein	96	10750	24-SEP-2019
WP_138072049.1		hypothetical protein	100	11034	27-MAY-2019
WP_138073545.1		manganese efflux pump	185	19936	28-JUL-2021
WP_012306302.1	A0A4P8WYY7	hypothetical protein	78	8526	24-SEP-2019
WP_138071013.1		hypothetical protein	71	8183	27-MAY-2019
WP_138071280.1		hypothetical protein	211	22783	27-MAY-2019
WP_138071003.1		hypothetical protein	202	22022	27-MAY-2019
