# Supplementary material for: Development of a Biotechnology Platform for the Fast-Growing Cyanobacterium Synechococcus sp. PCC 11901
Source: Biomolecules. 2022 Jun 23;12(7):872. doi: 10.3390/biom12070872 (PMC9313322; doi:10.3390/biom12070872)
Supplement: Supplementary file 1 [file biomolecules-12-00872-s001.zip › Table S6.xlsx]

## Sheet: Sheet1
Accession	Uniprot Accession	Gene Product	Gene Name	Gene names in Literature	Functional Sub-Category	Functional Category	Localisation		MW (kDa)	No. of TMHs
Table S6: PCC 11910 homologues of PCC 6803 proteins involved in electron transport and light harvesting.
Electron transport and light harvesting
Photosystem II
sll0258	Q55013	cytochrome c550	psbV	psbV, petK, psbK	Photosystem II	Photosynthesis & Respiration	Soluble proteins		17.9	0
BLAST Output	PCC 11901 Accession	Percentage Identity	Alignment Length	Mismatches	Gap Open	Synechocystis sp. PCC 6803 Start	Synechocystis sp. PCC 6803 End	PCC 11901 Start	PCC 11901 End	E-value	Bit Score
sp|Q55013|CY550_SYNY3	WP_012305751.1	49.682	157	77	2	1	156	10	165	3.34e-53	163
sp|Q55013|CY550_SYNY3	WP_065710337.1	44.000	25	14	0	83	107	171	195	0.41	27.3
sll1194	Q55332	photosystem II 12 kDa extrinsic protein	psbU	psbU	Photosystem II	Photosynthesis & Respiration	Soluble proteins		14.2	0
BLAST Output	PCC 11901 Accession	Percentage Identity	Alignment Length	Mismatches	Gap Open	Synechocystis sp. PCC 6803 Start	Synechocystis sp. PCC 6803 End	PCC 11901 Start	PCC 11901 End	E-value	Bit Score
sp|Q55332|PSBU_SYNY3	WP_012305956.1	47.619	126	65	1	7	131	13	138	5.20e-35	115
sp|Q55332|PSBU_SYNY3	WP_138073503.1	27.451	51	37	0	53	103	464	514	0.073	28.9
sp|Q55332|PSBU_SYNY3	WP_138071299.1	31.250	48	33	0	17	64	432	479	0.15	28.1
sp|Q55332|PSBU_SYNY3	WP_138071049.1	28.333	60	32	2	16	64	766	825	0.21	27.7
sp|Q55332|PSBU_SYNY3	WP_065710849.1	26.316	57	42	0	60	116	97	153	0.35	26.6
sp|Q55332|PSBU_SYNY3	WP_065710337.1	38.889	36	22	0	19	54	375	410	0.35	26.9
sp|Q55332|PSBU_SYNY3	WP_138073466.1	30.556	72	32	3	20	85	490	549	0.41	26.6
sp|Q55332|PSBU_SYNY3	WP_138072792.1	26.506	83	57	2	20	100	68	148	0.42	26.2
sp|Q55332|PSBU_SYNY3	WP_138073643.1	37.209	43	20	2	78	120	105	140	0.67	26.2
sp|Q55332|PSBU_SYNY3	WP_138073625.1	28.205	39	28	0	72	110	31	69	0.92	25.4
slr0927	P09192	photosystem II reaction center D2 protein	psbD2	psbD2, psbD, psbD-2, psbDII	Photosystem II	Photosynthesis & Respiration
BLAST Output	PCC 11901 Accession	Percentage Identity	Alignment Length	Mismatches	Gap Open	Synechocystis sp. PCC 6803 Start	Synechocystis sp. PCC 6803 End	PCC 11901 Start	PCC 11901 End	E-value	Bit Score
sp|P09192|PSBD_SYNY3	WP_012307174.1	93.750	352	22	0	1	352	1	352	0.0	673
sp|P09192|PSBD_SYNY3	WP_012307032.1	31.481	324	208	6	23	339	23	339	9.14e-47	159
sp|P09192|PSBD_SYNY3	WP_099239132.1	32.407	324	204	7	23	339	24	339	9.54e-47	159
sll0851	P09193	photosystem II CP43 protein	psbC	psbC	Photosystem II	Photosynthesis & Respiration	TM		50.3	6
BLAST Output	PCC 11901 Accession	Percentage Identity	Alignment Length	Mismatches	Gap Open	Synechocystis sp. PCC 6803 Start	Synechocystis sp. PCC 6803 End	PCC 11901 Start	PCC 11901 End	E-value	Bit Score
sp|P09193|PSBC_SYNY3	WP_030008145.1	86.304	460	63	0	1	460	1	460	0.0	805
sp|P09193|PSBC_SYNY3	WP_138073172.1	53.901	282	115	4	14	292	5	274	2.25e-91	278
sp|P09193|PSBC_SYNY3	WP_138073172.1	64.516	31	11	0	405	435	294	324	0.020	33.5
sp|P09193|PSBC_SYNY3	WP_012307371.1	25.344	509	281	17	19	449	2	489	5.34e-19	85.9
sp|P09193|PSBC_SYNY3	WP_138073885.1	22.549	204	138	5	219	408	304	501	0.49	29.3
sp|P09193|PSBC_SYNY3	WP_062433224.1	37.500	32	20	0	95	126	104	135	0.95	27.7
sll1418	P73952	photosystem II oxygen-evolving complex 23K protein PsbP homolog	psbP2	psbP, psbP2, sll1418	Photosystem II	Photosynthesis & Respiration	TM		20.7	0
BLAST Output	PCC 11901 Accession	Percentage Identity	Alignment Length	Mismatches	Gap Open	Synechocystis sp. PCC 6803 Start	Synechocystis sp. PCC 6803 End	PCC 11901 Start	PCC 11901 End	E-value	Bit Score
tr|P73952|P73952_SYNY3	WP_012306923.1	57.979	188	73	3	1	187	1	183	1.08e-71	211
tr|P73952|P73952_SYNY3	WP_084449040.1	39.024	41	20	2	52	90	46	83	0.91	26.2
sll1638	P73048	hypothetical protein		psbQ	Photosystem II	Photosynthesis & Respiration	TM		16.5	0
BLAST Output	PCC 11901 Accession	Percentage Identity	Alignment Length	Mismatches	Gap Open	Synechocystis sp. PCC 6803 Start	Synechocystis sp. PCC 6803 End	PCC 11901 Start	PCC 11901 End	E-value	Bit Score
tr|P73048|P73048_SYNY3	WP_030007006.1	56.818	132	56	1	15	146	15	145	3.25e-54	164
tr|P73048|P73048_SYNY3	WP_012305903.1	57.143	21	9	0	3	23	2	22	0.37	26.9
slr0906	P05429	photosystem II core light harvesting protein	psbB	psbB	Photosystem II	Photosynthesis & Respiration	TM		55.9	6
BLAST Output	PCC 11901 Accession	Percentage Identity	Alignment Length	Mismatches	Gap Open	Synechocystis sp. PCC 6803 Start	Synechocystis sp. PCC 6803 End	PCC 11901 Start	PCC 11901 End	E-value	Bit Score
sp|P05429|PSBB_SYNY3	WP_012307371.1	87.525	505	62	1	1	504	1	505	0.0	884
sp|P05429|PSBB_SYNY3	WP_030008145.1	24.395	496	264	22	2	469	19	431	1.09e-17	82.0
sp|P05429|PSBB_SYNY3	WP_138073172.1	30.612	98	55	3	17	114	25	109	1.37e-06	46.6
sp|P05429|PSBB_SYNY3	WP_138073218.1	35.897	39	24	1	466	504	786	823	0.92	28.5
sll1867	P16033	photosystem II D1 protein	psbA3	psbA3, psba-3, psbA, psbAIII, sll1867	Photosystem II	Photosynthesis & Respiration
BLAST Output	PCC 11901 Accession	Percentage Identity	Alignment Length	Mismatches	Gap Open	Synechocystis sp. PCC 6803 Start	Synechocystis sp. PCC 6803 End	PCC 11901 Start	PCC 11901 End	E-value	Bit Score
sp|P16033|PSBA2_SYNY3	WP_012307032.1	94.444	360	20	0	1	360	1	360	0.0	712
sp|P16033|PSBA2_SYNY3	WP_099239132.1	84.167	360	57	0	1	360	1	360	0.0	648
sp|P16033|PSBA2_SYNY3	WP_012307174.1	31.802	283	183	5	23	302	23	298	2.26e-45	155
sp|P16033|PSBA2_SYNY3	WP_030007840.1	26.027	73	53	1	80	151	72	144	0.91	27.7
slr1645	P74367	photosystem II 11 kD protein	psb27, psbZ	psb27, psbZ, slr1645	Photosystem II	Photosynthesis & Respiration	TM		14.9	0
BLAST Output	PCC 11901 Accession	Percentage Identity	Alignment Length	Mismatches	Gap Open	Synechocystis sp. PCC 6803 Start	Synechocystis sp. PCC 6803 End	PCC 11901 Start	PCC 11901 End	E-value	Bit Score
sp|P74367|PSB27_SYNY3	WP_030007767.1	59.124	137	51	2	3	134	1	137	4.93e-54	163
sp|P74367|PSB27_SYNY3	WP_138071091.1	35.484	31	20	0	64	94	3	33	0.057	27.7
sp|P74367|PSB27_SYNY3	WP_138072625.1	23.846	130	65	4	9	115	18	136	0.14	27.7
sp|P74367|PSB27_SYNY3	WP_138073022.1	30.952	84	46	3	53	127	944	1024	0.25	27.3
sp|P74367|PSB27_SYNY3	WP_138073130.1	32.609	46	29	1	65	108	136	181	0.28	27.3
sp|P74367|PSB27_SYNY3	WP_138071077.1	36.585	41	23	1	63	100	263	303	0.36	26.9
sp|P74367|PSB27_SYNY3	WP_138070980.1	36.585	41	23	1	63	100	263	303	0.37	26.9
sp|P74367|PSB27_SYNY3	WP_138073839.1	32.558	43	29	0	76	118	195	237	0.45	26.6
ssr3451	P09190	cytochrome b559 alpha subunit	psbE	psbE, ssr3451	Photosystem II	Photosynthesis & Respiration	TM		9.4	1
BLAST Output	PCC 11901 Accession	Percentage Identity	Alignment Length	Mismatches	Gap Open	Synechocystis sp. PCC 6803 Start	Synechocystis sp. PCC 6803 End	PCC 11901 Start	PCC 11901 End	E-value	Bit Score
sp|P09190|PSBE_SYNY3	WP_012305866.1	80.247	81	16	0	1	81	1	81	2.41e-47	142
sll0427	P10549	photosystem II manganese-stabilizing polypeptide	psbO	psbO	Photosystem II	Photosynthesis & Respiration	Unknown		29.9	0
BLAST Output	PCC 11901 Accession	Percentage Identity	Alignment Length	Mismatches	Gap Open	Synechocystis sp. PCC 6803 Start	Synechocystis sp. PCC 6803 End	PCC 11901 Start	PCC 11901 End	E-value	Bit Score
sp|P10549|PSBO_SYNY3	WP_012305903.1	57.246	276	114	2	1	272	1	276	2.79e-113	324
sp|P10549|PSBO_SYNY3	WP_138072341.1	32.000	50	33	1	4	52	7	56	0.019	32.3
sp|P10549|PSBO_SYNY3	WP_138071071.1	28.037	107	62	4	163	255	803	908	0.24	29.3
sll1398	Q55356	photosystem II reaction center 13 kDa protein	psb28, psbW, psb13, ycf79	psb28, psb13, ycf79, psbW, psb28-1	Photosystem II	Photosynthesis & Respiration	Unknown		12.6	0
BLAST Output	PCC 11901 Accession	Percentage Identity	Alignment Length	Mismatches	Gap Open	Synechocystis sp. PCC 6803 Start	Synechocystis sp. PCC 6803 End	PCC 11901 Start	PCC 11901 End	E-value	Bit Score
sp|Q55356|PSB28_SYNY3	WP_012306879.1	63.063	111	41	0	1	111	1	111	3.36e-49	149
sp|Q55356|PSB28_SYNY3	WP_065716329.1	24.576	118	76	3	4	111	25	139	4.76e-06	39.7
slr1739	P73731	photosystem II 13 kDa protein homolog	psb28-2	psb28-2, psb28, psbW, slr1739	Photosystem II	Photosynthesis & Respiration	Unknown		14.1	0
BLAST Output	PCC 11901 Accession	Percentage Identity	Alignment Length	Mismatches	Gap Open	Synechocystis sp. PCC 6803 Start	Synechocystis sp. PCC 6803 End	PCC 11901 Start	PCC 11901 End	E-value	Bit Score
tr|P73731|P73731_SYNY3	WP_065716329.1	57.143	112	48	0	8	119	25	136	1.22e-44	139
tr|P73731|P73731_SYNY3	WP_012306879.1	31.683	101	61	3	17	117	14	106	1.48e-07	43.5
tr|P73731|P73731_SYNY3	WP_138073402.1	46.429	28	15	0	47	74	377	404	0.039	29.6
sml0007	P73676	photosystem II protein Y	psbY	psbY, ycf32, sml0007	Photosystem II	Photosynthesis & Respiration	Unknown		4.2	1
BLAST Output	PCC 11901 Accession	Percentage Identity	Alignment Length	Mismatches	Gap Open	Synechocystis sp. PCC 6803 Start	Synechocystis sp. PCC 6803 End	PCC 11901 Start	PCC 11901 End	E-value	Bit Score
sp|P73676|PSBY_SYNY3	WP_012306966.1	50.000	38	19	0	1	38	1	38	2.93e-10	45.4
sll0047	Q55438	hypothetical protein YCF12	ycf12	ycf12, psb30	Photosystem II	Photosynthesis & Respiration
BLAST Output	PCC 11901 Accession	Percentage Identity	Alignment Length	Mismatches	Gap Open	Synechocystis sp. PCC 6803 Start	Synechocystis sp. PCC 6803 End	PCC 11901 Start	PCC 11901 End	E-value	Bit Score
sp|Q55438|YCF12_SYNY3	WP_012306608.1	60.000	35	14	0	5	39	9	43	3.86e-11	47.8
sll1281	P73528	photosystem II PsbZ protein	psbZ, ycf9	psbZ, ycf9	Photosystem II	Photosynthesis & Respiration
BLAST Output	PCC 11901 Accession	Percentage Identity	Alignment Length	Mismatches	Gap Open	Synechocystis sp. PCC 6803 Start	Synechocystis sp. PCC 6803 End	PCC 11901 Start	PCC 11901 End	E-value	Bit Score
sp|P73528|PSBZ_SYNY3	WP_012305774.1	62.903	62	23	0	1	62	1	62	1.01e-19	70.9
sll1867	P16033	photosystem II D1 protein	psbA3	psbA3, psba-3, psbA, psbAIII, sll1867	Photosystem II	Photosynthesis & Respiration
BLAST Output	PCC 11901 Accession	Percentage Identity	Alignment Length	Mismatches	Gap Open	Synechocystis sp. PCC 6803 Start	Synechocystis sp. PCC 6803 End	PCC 11901 Start	PCC 11901 End	E-value	Bit Score
sp|P16033|PSBA2_SYNY3	WP_012307032.1	94.444	360	20	0	1	360	1	360	0.0	712
sp|P16033|PSBA2_SYNY3	WP_099239132.1	84.167	360	57	0	1	360	1	360	0.0	648
sp|P16033|PSBA2_SYNY3	WP_012307174.1	31.802	283	183	5	23	302	23	298	2.26e-45	155
sp|P16033|PSBA2_SYNY3	WP_030007840.1	26.027	73	53	1	80	151	72	144	0.91	27.7
slr0927	P09192	photosystem II reaction center D2 protein	psbD2	psbD2, psbD, psbD-2, psbDII	Photosystem II	Photosynthesis & Respiration
BLAST Output	PCC 11901 Accession	Percentage Identity	Alignment Length	Mismatches	Gap Open	Synechocystis sp. PCC 6803 Start	Synechocystis sp. PCC 6803 End	PCC 11901 Start	PCC 11901 End	E-value	Bit Score
sp|P09192|PSBD_SYNY3	WP_012307174.1	93.750	352	22	0	1	352	1	352	0.0	673
sp|P09192|PSBD_SYNY3	WP_012307032.1	31.481	324	208	6	23	339	23	339	9.14e-47	159
sp|P09192|PSBD_SYNY3	WP_099239132.1	32.407	324	204	7	23	339	24	339	9.54e-47	159
slr1181	P07826	photosystem II D1 protein	psbA1	psbA1, psba-1, psbA, psbAI	Photosystem II	Photosynthesis & Respiration
BLAST Output	PCC 11901 Accession	Percentage Identity	Alignment Length	Mismatches	Gap Open	Synechocystis sp. PCC 6803 Start	Synechocystis sp. PCC 6803 End	PCC 11901 Start	PCC 11901 End	E-value	Bit Score
sp|P07826|PSBA1_SYNY3	WP_012307032.1	84.167	360	57	0	1	360	1	360	0.0	644
sp|P07826|PSBA1_SYNY3	WP_099239132.1	85.112	356	50	1	8	360	5	360	0.0	639
sp|P07826|PSBA1_SYNY3	WP_012307174.1	30.844	308	202	7	9	313	10	309	6.81e-45	154
sml0001	Q54697	photosystem II reaction center PsbI protein	psbI	psbI, sml0001	Photosystem II	Photosynthesis & Respiration
BLAST Output	PCC 11901 Accession	Percentage Identity	Alignment Length	Mismatches	Gap Open	Synechocystis sp. PCC 6803 Start	Synechocystis sp. PCC 6803 End	PCC 11901 Start	PCC 11901 End	E-value	Bit Score
sp|Q54697|PSBI_SYNY3	WP_015132356.1	89.474	38	4	0	1	38	1	38	4.56e-20	70.1
sp|Q54697|PSBI_SYNY3	WP_012306580.1	36.000	25	16	0	14	38	155	179	0.26	23.9
sml0002	P72575	photosystem II PsbX protein	psbX	psbX, sml0002	Photosystem II	Photosynthesis & Respiration
BLAST Output	PCC 11901 Accession	Percentage Identity	Alignment Length	Mismatches	Gap Open	Synechocystis sp. PCC 6803 Start	Synechocystis sp. PCC 6803 End	PCC 11901 Start	PCC 11901 End	E-value	Bit Score
sp|P72575|PSBX_SYNY3	WP_030005983.1	68.421	38	12	0	1	38	1	38	2.55e-14	55.8
sp|P72575|PSBX_SYNY3	WP_065710394.1	30.769	26	18	0	3	28	13	38	0.39	23.5
sp|P72575|PSBX_SYNY3	WP_012307148.1	37.500	32	20	0	7	38	179	210	0.77	22.3
sml0003	P72701	photosystem II reaction center M protein	psbM	psbM, sml0003	Photosystem II	Photosynthesis & Respiration
BLAST Output	PCC 11901 Accession	Percentage Identity	Alignment Length	Mismatches	Gap Open	Synechocystis sp. PCC 6803 Start	Synechocystis sp. PCC 6803 End	PCC 11901 Start	PCC 11901 End	E-value	Bit Score
sp|P72701|PSBM_SYNY3	WP_012307751.1	79.412	34	7	0	1	34	1	34	1.97e-14	55.8
sml0005	P15819	photosystem II PsbK protein	psbK	psbK, sml0005	Photosystem II	Photosynthesis & Respiration
BLAST Output	PCC 11901 Accession	Percentage Identity	Alignment Length	Mismatches	Gap Open	Synechocystis sp. PCC 6803 Start	Synechocystis sp. PCC 6803 End	PCC 11901 Start	PCC 11901 End	E-value	Bit Score
sp|P15819|PSBK_SYNY3	WP_012308371.1	86.667	45	6	0	1	45	1	45	1.04e-14	57.0
sp|P15819|PSBK_SYNY3	WP_012307609.1	34.615	26	17	0	10	35	270	295	0.83	22.7
smr0001	P74787	photosystem II PsbT protein	psbT, ycf8	psbT, psbTc, ycf8, smr0001	Photosystem II	Photosynthesis & Respiration
BLAST Output	PCC 11901 Accession	Percentage Identity	Alignment Length	Mismatches	Gap Open	Synechocystis sp. PCC 6803 Start	Synechocystis sp. PCC 6803 End	PCC 11901 Start	PCC 11901 End	E-value	Bit Score
sp|P74787|PSBT_SYNY3	WP_012306584.1	87.097	31	4	0	1	31	1	31	8.06e-15	56.6
smr0006	P09191	cytochrome b559 b subunit	psbF	psbF, smr0006	Photosystem II	Photosynthesis & Respiration
BLAST Output	PCC 11901 Accession	Percentage Identity	Alignment Length	Mismatches	Gap Open	Synechocystis sp. PCC 6803 Start	Synechocystis sp. PCC 6803 End	PCC 11901 Start	PCC 11901 End	E-value	Bit Score
sp|P09191|PSBF_SYNY3	WP_012305867.1	90.476	42	4	0	3	44	2	43	3.86e-24	80.9
smr0007	Q55354	photosystem II PsbL protein	psbL	psbL, smr0007	Photosystem II	Photosynthesis & Respiration
BLAST Output	PCC 11901 Accession	Percentage Identity	Alignment Length	Mismatches	Gap Open	Synechocystis sp. PCC 6803 Start	Synechocystis sp. PCC 6803 End	PCC 11901 Start	PCC 11901 End	E-value	Bit Score
sp|Q55354|PSBL_SYNY3	WP_012305868.1	92.308	39	3	0	1	39	1	39	4.50e-22	75.5
sp|Q55354|PSBL_SYNY3	WP_138072808.1	39.286	28	17	0	7	34	416	443	0.019	26.9
sp|Q55354|PSBL_SYNY3	WP_138073672.1	81.818	11	2	0	6	16	336	346	0.29	23.9
smr0008	P73070	photosystem II PsbJ protein	psbJ	psbJ, smr0008	Photosystem II	Photosynthesis & Respiration
BLAST Output	PCC 11901 Accession	Percentage Identity	Alignment Length	Mismatches	Gap Open	Synechocystis sp. PCC 6803 Start	Synechocystis sp. PCC 6803 End	PCC 11901 Start	PCC 11901 End	E-value	Bit Score
sp|P73070|PSBJ_SYNY3	WP_012305869.1	68.571	35	11	0	5	39	5	39	1.12e-12	51.6
sp|P73070|PSBJ_SYNY3	WP_065711453.1	38.462	26	11	1	7	32	217	237	0.46	23.1
sp|P73070|PSBJ_SYNY3	WP_138072693.1	38.462	26	15	1	7	32	116	140	0.50	23.1
sp|P73070|PSBJ_SYNY3	WP_138073600.1	45.455	22	12	0	17	38	96	117	0.51	23.1
smr0009	P26286	photosystem II PsbN protein	psbN	psbN, smr0009	Photosystem II	Photosynthesis & Respiration
BLAST Output	PCC 11901 Accession	Percentage Identity	Alignment Length	Mismatches	Gap Open	Synechocystis sp. PCC 6803 Start	Synechocystis sp. PCC 6803 End	PCC 11901 Start	PCC 11901 End	E-value	Bit Score
sp|P26286|PSBN_SYNY3	WP_012306437.1	69.767	43	13	0	1	43	1	43	1.09e-18	67.0
ssl2598	P14835	photosystem II PsbH protein	psbH	psbH, ssl2598	Photosystem II	Photosynthesis & Respiration
BLAST Output	PCC 11901 Accession	Percentage Identity	Alignment Length	Mismatches	Gap Open	Synechocystis sp. PCC 6803 Start	Synechocystis sp. PCC 6803 End	PCC 11901 Start	PCC 11901 End	E-value	Bit Score
sp|P14835|PSBH_SYNY3	WP_012306436.1	93.548	62	4	0	1	62	1	62	7.08e-32	102
slr2034	P73069	putative homolog of plant HCF136, which is essential for stability or assembly of photosystem II	ycf48	ycf48	Photosystem II assembly/repair	Photosynthesis & Respiration	TM		37.3	0
BLAST Output	PCC 11901 Accession	Percentage Identity	Alignment Length	Mismatches	Gap Open	Synechocystis sp. PCC 6803 Start	Synechocystis sp. PCC 6803 End	PCC 11901 Start	PCC 11901 End	E-value	Bit Score
sp|P73069|YC48L_SYNY3	WP_012305865.1	66.366	333	109	2	10	339	8	340	1.07e-164	459
Photosystem I
sll0819	P29256	photosystem I reaction center subunit III precursor (PSI-F), plastocyanin (cyt c553) docking protein	psaF	psaF, sll0819, psbF	Photosystem I	Photosynthesis & Respiration	TM		18.2	0
BLAST Output	PCC 11901 Accession	Percentage Identity	Alignment Length	Mismatches	Gap Open	Synechocystis sp. PCC 6803 Start	Synechocystis sp. PCC 6803 End	PCC 11901 Start	PCC 11901 End	E-value	Bit Score
sp|P29256|PSAF_SYNY3	WP_030007236.1	62.130	169	60	1	1	165	1	169	3.83e-78	226
sp|P29256|PSAF_SYNY3	WP_138071557.1	35.294	51	29	1	20	66	108	158	0.28	27.7
sp|P29256|PSAF_SYNY3	WP_168191165.1	32.432	37	25	0	49	85	6	42	0.64	26.6
sp|P29256|PSAF_SYNY3	WP_065710572.1	48.000	25	11	1	5	27	20	44	0.89	26.2
slr0737	P19569	photosystem I subunit II	psaD	psaD	Photosystem I	Photosynthesis & Respiration	TM		15.6	0
BLAST Output	PCC 11901 Accession	Percentage Identity	Alignment Length	Mismatches	Gap Open	Synechocystis sp. PCC 6803 Start	Synechocystis sp. PCC 6803 End	PCC 11901 Start	PCC 11901 End	E-value	Bit Score
sp|P19569|PSAD_SYNY3	WP_012306311.1	75.540	139	34	0	3	141	4	142	7.32e-78	224
sp|P19569|PSAD_SYNY3	WP_012306383.1	47.619	21	11	0	75	95	13	33	0.40	25.8
sp|P19569|PSAD_SYNY3	WP_138073370.1	22.549	102	74	2	12	113	144	240	0.83	25.8
slr1655	P37277	photosystem I subunit XI	psaL	psaL, psaL1	Photosystem I	Photosynthesis & Respiration	TM		16.6	2
BLAST Output	PCC 11901 Accession	Percentage Identity	Alignment Length	Mismatches	Gap Open	Synechocystis sp. PCC 6803 Start	Synechocystis sp. PCC 6803 End	PCC 11901 Start	PCC 11901 End	E-value	Bit Score
sp|P37277|PSAL_SYNY3	WP_030007435.1	50.336	149	67	2	6	148	2	149	5.53e-44	139
slr1834	P29254	P700 apoprotein subunit Ia	psaA	psaA, psaB	Photosystem I	Photosynthesis & Respiration	TM		82.9	11
BLAST Output	PCC 11901 Accession	Percentage Identity	Alignment Length	Mismatches	Gap Open	Synechocystis sp. PCC 6803 Start	Synechocystis sp. PCC 6803 End	PCC 11901 Start	PCC 11901 End	E-value	Bit Score
sp|P29254|PSAA_SYNY3	WP_099238850.1	88.618	738	83	1	14	751	3	739	0.0	1357
sp|P29254|PSAA_SYNY3	WP_012307572.1	44.768	755	342	15	34	747	8	728	0.0	585
slr1835	P29255	P700 apoprotein subunit Ib	psaB	psaB, psaA	Photosystem I	Photosynthesis & Respiration	TM		81.2	11
BLAST Output	PCC 11901 Accession	Percentage Identity	Alignment Length	Mismatches	Gap Open	Synechocystis sp. PCC 6803 Start	Synechocystis sp. PCC 6803 End	PCC 11901 Start	PCC 11901 End	E-value	Bit Score
sp|P29255|PSAB_SYNY3	WP_012307572.1	92.906	733	50	1	1	731	1	733	0.0	1374
sp|P29255|PSAB_SYNY3	WP_099238850.1	45.406	751	340	17	8	726	23	735	0.0	608
sp|P29255|PSAB_SYNY3	WP_138071716.1	33.333	51	34	0	277	327	83	133	0.035	33.1
ssr2831	P12975	photosystem I subunit IV	psaE	psaE	Photosystem I	Photosynthesis & Respiration	TM		8.1	0
BLAST Output	PCC 11901 Accession	Percentage Identity	Alignment Length	Mismatches	Gap Open	Synechocystis sp. PCC 6803 Start	Synechocystis sp. PCC 6803 End	PCC 11901 Start	PCC 11901 End	E-value	Bit Score
sp|P12975|PSAE_SYNY3	WP_012307012.1	78.261	69	15	0	1	69	1	69	5.07e-38	117
sp|P12975|PSAE_SYNY3	WP_138071030.1	33.333	36	20	1	9	40	26	61	0.72	24.3
sp|P12975|PSAE_SYNY3	WP_138073058.1	34.375	32	21	0	6	37	45	76	0.93	23.9
ssl0563	P32422	photosystem I subunit VII	psaC	psaC, psaC2, ssl0563	Photosystem I	Photosynthesis & Respiration	Unknown		8.8	0
BLAST Output	PCC 11901 Accession	Percentage Identity	Alignment Length	Mismatches	Gap Open	Synechocystis sp. PCC 6803 Start	Synechocystis sp. PCC 6803 End	PCC 11901 Start	PCC 11901 End	E-value	Bit Score
sp|P32422|PSAC_SYNY3	WP_012307203.1	98.765	81	1	0	1	81	1	81	4.86e-57	166
sp|P32422|PSAC_SYNY3	WP_062433090.1	33.871	62	36	2	8	65	61	121	1.08e-04	35.0
sp|P32422|PSAC_SYNY3	WP_138073334.1	25.000	92	49	3	7	78	21	112	0.005	30.8
sp|P32422|PSAC_SYNY3	WP_138073334.1	45.833	24	13	0	2	25	67	90	0.006	30.4
sp|P32422|PSAC_SYNY3	WP_138073720.1	40.741	27	16	0	1	27	124	150	0.010	29.6
sp|P32422|PSAC_SYNY3	WP_138073720.1	33.333	24	16	0	48	71	134	157	0.42	25.0
sp|P32422|PSAC_SYNY3	WP_138073249.1	22.857	70	35	1	9	59	688	757	0.024	28.9
sp|P32422|PSAC_SYNY3	WP_138073249.1	26.316	38	28	0	31	68	673	710	0.083	27.3
sp|P32422|PSAC_SYNY3	WP_138073530.1	55.556	18	8	0	43	60	182	199	0.061	27.7
sp|P32422|PSAC_SYNY3	WP_138073530.1	28.571	63	31	4	11	59	187	249	0.17	26.2
sp|P32422|PSAC_SYNY3	WP_138072148.1	33.871	62	30	4	8	60	145	204	0.13	26.6
sp|P32422|PSAC_SYNY3	WP_012306860.1	29.508	61	41	2	1	61	1	59	0.17	25.4
sp|P32422|PSAC_SYNY3	WP_138073270.1	39.130	23	12	1	2	22	618	640	0.26	25.8
sp|P32422|PSAC_SYNY3	WP_012307405.1	26.786	56	35	1	9	64	82	131	0.66	24.3
sll0629	P74564	alternative photosystem I reaction center subunit X	psaK2	psaK, psaK2	Photosystem I	Photosynthesis & Respiration
BLAST Output	PCC 11901 Accession	Percentage Identity	Alignment Length	Mismatches	Gap Open	Synechocystis sp. PCC 6803 Start	Synechocystis sp. PCC 6803 End	PCC 11901 Start	PCC 11901 End	E-value	Bit Score
sp|P74564|PSAK2_SYNY3	WP_138071377.1	50.000	84	40	1	5	88	4	85	3.61e-22	79.0
sml0008	Q55329	photosystem I subunit IX	psaJ	psaJ, sml0008, psbJ	Photosystem I	Photosynthesis & Respiration
BLAST Output	PCC 11901 Accession	Percentage Identity	Alignment Length	Mismatches	Gap Open	Synechocystis sp. PCC 6803 Start	Synechocystis sp. PCC 6803 End	PCC 11901 Start	PCC 11901 End	E-value	Bit Score
sp|Q55329|PSAJ_SYNY3	WP_012306636.1	67.568	37	12	0	4	40	1	37	1.89e-15	58.5
smr0004	Q55330	photosystem I subunit VIII	psaI	psaI, smr0004	Photosystem I	Photosynthesis & Respiration
BLAST Output	PCC 11901 Accession	Percentage Identity	Alignment Length	Mismatches	Gap Open	Synechocystis sp. PCC 6803 Start	Synechocystis sp. PCC 6803 End	PCC 11901 Start	PCC 11901 End	E-value	Bit Score
sp|Q55330|PSAI_SYNY3	WP_012308216.1	60.526	38	15	0	1	38	1	38	3.72e-13	52.8
sp|Q55330|PSAI_SYNY3	WP_181445687.1	40.000	20	12	0	12	31	27	46	0.62	22.7
smr0005	P72986	photosystem I subunit XII	psaM	psaM, smr0005	Photosystem I	Photosynthesis & Respiration
BLAST Output	PCC 11901 Accession	Percentage Identity	Alignment Length	Mismatches	Gap Open	Synechocystis sp. PCC 6803 Start	Synechocystis sp. PCC 6803 End	PCC 11901 Start	PCC 11901 End	E-value	Bit Score
sp|P72986|PSAM_SYNY3	WP_012307445.1	70.968	31	9	0	1	31	1	31	4.72e-12	49.7
ssr0390	P72712	photosystem I reaction center subunit X	psaK1	psaK, psaK1, ssr0390	Photosystem I	Photosynthesis & Respiration
BLAST Output	PCC 11901 Accession	Percentage Identity	Alignment Length	Mismatches	Gap Open	Synechocystis sp. PCC 6803 Start	Synechocystis sp. PCC 6803 End	PCC 11901 Start	PCC 11901 End	E-value	Bit Score
sp|P72712|PSAK1_SYNY3	WP_138071377.1	59.524	84	34	0	3	86	4	87	3.92e-30	99.0
sll0226	P72705	photosystem I assembly related protein	ycf4	ycf4	Photosystem I biogenesis/assembly	Photosynthesis & Respiration	TM		20.4	2
BLAST Output	PCC 11901 Accession	Percentage Identity	Alignment Length	Mismatches	Gap Open	Synechocystis sp. PCC 6803 Start	Synechocystis sp. PCC 6803 End	PCC 11901 Start	PCC 11901 End	E-value	Bit Score
sp|P72705|YCF4_SYNY3	WP_012306718.1	63.298	188	69	0	1	188	1	188	1.26e-86	249
sp|P72705|YCF4_SYNY3	WP_138071943.1	31.507	73	48	2	21	91	208	280	0.19	28.5
slr0171	Q55551	photosystem I assembly related protein Ycf37	ycf37	ycf37	Photosystem I biogenesis/assembly	Photosynthesis & Respiration	TM		20.1	1
BLAST Output	PCC 11901 Accession	Percentage Identity	Alignment Length	Mismatches	Gap Open	Synechocystis sp. PCC 6803 Start	Synechocystis sp. PCC 6803 End	PCC 11901 Start	PCC 11901 End	E-value	Bit Score
tr|Q55551|Q55551_SYNY3	WP_012307776.1	68.421	171	54	0	3	173	4	174	4.06e-83	239
tr|Q55551|Q55551_SYNY3	WP_062434815.1	26.271	118	74	3	51	167	38	143	3.96e-06	42.4
tr|Q55551|Q55551_SYNY3	WP_062434815.1	27.778	90	58	2	68	156	82	165	5.19e-04	35.8
tr|Q55551|Q55551_SYNY3	WP_062434815.1	23.750	80	56	1	53	132	101	175	0.34	27.3
tr|Q55551|Q55551_SYNY3	WP_099238558.1	25.833	120	73	2	55	160	38	155	6.12e-06	41.2
tr|Q55551|Q55551_SYNY3	WP_138071559.1	24.000	100	71	2	58	157	119	213	5.40e-05	38.9
tr|Q55551|Q55551_SYNY3	WP_138071559.1	24.272	103	73	2	53	155	80	177	1.36e-04	37.7
tr|Q55551|Q55551_SYNY3	WP_138071468.1	39.216	51	31	0	108	158	39	89	2.79e-04	37.0
tr|Q55551|Q55551_SYNY3	WP_065711483.1	26.563	64	47	0	98	161	66	129	0.001	35.0
tr|Q55551|Q55551_SYNY3	WP_065711483.1	23.571	140	102	2	35	174	76	210	0.007	32.7
tr|Q55551|Q55551_SYNY3	WP_065711483.1	26.316	133	83	5	35	159	110	235	0.021	31.2
tr|Q55551|Q55551_SYNY3	WP_138072398.1	25.962	104	64	3	59	158	70	164	0.001	35.0
tr|Q55551|Q55551_SYNY3	WP_138072398.1	25.532	94	65	1	68	161	113	201	0.004	33.5
tr|Q55551|Q55551_SYNY3	WP_138073582.1	26.214	103	71	2	55	157	132	229	0.004	33.5
tr|Q55551|Q55551_SYNY3	WP_138073582.1	29.688	64	45	0	98	161	68	131	0.042	30.4
tr|Q55551|Q55551_SYNY3	WP_138073582.1	26.882	93	61	4	71	162	80	166	0.17	28.5
tr|Q55551|Q55551_SYNY3	WP_138073403.1	19.298	114	87	1	42	155	212	320	0.005	33.1
tr|Q55551|Q55551_SYNY3	WP_138073403.1	22.222	81	61	1	83	163	216	294	0.46	27.3
tr|Q55551|Q55551_SYNY3	WP_138073771.1	23.364	107	77	1	55	161	484	585	0.011	32.3
tr|Q55551|Q55551_SYNY3	WP_138073771.1	23.200	125	71	3	71	175	602	721	0.17	28.9
tr|Q55551|Q55551_SYNY3	WP_168191150.1	29.915	117	64	5	56	162	33	141	0.021	30.8
tr|Q55551|Q55551_SYNY3	WP_138073746.1	24.771	109	69	2	57	157	208	311	0.035	30.8
tr|Q55551|Q55551_SYNY3	WP_138073473.1	42.105	38	19	2	58	93	175	211	0.30	27.7
tr|Q55551|Q55551_SYNY3	WP_138073313.1	22.105	95	67	3	73	163	591	682	0.40	27.7
tr|Q55551|Q55551_SYNY3	WP_012307759.1	22.308	130	81	4	1	130	15	124	0.60	26.9
sll0634	P72966	photosystem I biogenesis protein BtpA	btpA	btpA	Photosystem I biogenesis/assembly	Photosynthesis & Respiration	Unknown		30	0
BLAST Output	PCC 11901 Accession	Percentage Identity	Alignment Length	Mismatches	Gap Open	Synechocystis sp. PCC 6803 Start	Synechocystis sp. PCC 6803 End	PCC 11901 Start	PCC 11901 End	E-value	Bit Score
sp|P72966|BTPA_SYNY3	WP_012306602.1	69.597	273	83	0	1	273	1	273	6.02e-143	400
slr0823	P74063	photosystem I assembly related protein	ycf3	ycf3	Photosystem I biogenesis/assembly	Photosynthesis & Respiration	Unknown		19.9	0
BLAST Output	PCC 11901 Accession	Percentage Identity	Alignment Length	Mismatches	Gap Open	Synechocystis sp. PCC 6803 Start	Synechocystis sp. PCC 6803 End	PCC 11901 Start	PCC 11901 End	E-value	Bit Score
sp|P74063|YCF3_SYNY3	WP_099238558.1	84.393	173	27	0	1	173	1	173	2.55e-112	313
sp|P74063|YCF3_SYNY3	WP_138073403.1	34.568	81	39	2	75	155	225	291	1.28e-06	43.9
sp|P74063|YCF3_SYNY3	WP_138073771.1	36.765	68	40	2	35	102	549	613	1.21e-04	38.1
sp|P74063|YCF3_SYNY3	WP_138073771.1	26.531	98	61	2	51	148	633	719	0.002	34.7
sp|P74063|YCF3_SYNY3	WP_138073771.1	24.752	101	66	3	39	139	349	439	0.069	30.0
sp|P74063|YCF3_SYNY3	WP_138071468.1	25.373	134	67	4	38	142	25	154	2.49e-04	37.0
sp|P74063|YCF3_SYNY3	WP_138071468.1	32.813	64	40	2	36	99	160	220	0.012	32.0
sp|P74063|YCF3_SYNY3	WP_138071575.1	26.437	87	61	1	32	118	81	164	0.003	33.9
sp|P74063|YCF3_SYNY3	WP_138071575.1	29.870	77	51	2	38	114	155	228	0.020	31.2
sp|P74063|YCF3_SYNY3	WP_012307759.1	28.333	120	75	2	37	152	87	199	0.003	33.5
sp|P74063|YCF3_SYNY3	WP_012307759.1	35.211	71	43	2	47	117	179	246	0.010	32.3
sp|P74063|YCF3_SYNY3	WP_012307759.1	27.632	76	41	1	76	151	55	116	0.27	27.7
sp|P74063|YCF3_SYNY3	WP_138072398.1	26.374	91	49	2	28	103	75	162	0.004	33.5
sp|P74063|YCF3_SYNY3	WP_138072398.1	26.214	103	59	2	51	153	79	164	0.16	28.5
sp|P74063|YCF3_SYNY3	WP_138072398.1	30.137	73	44	4	51	122	283	349	0.94	26.2
sp|P74063|YCF3_SYNY3	WP_138073582.1	35.294	51	32	1	76	126	167	216	0.005	33.1
sp|P74063|YCF3_SYNY3	WP_138073582.1	26.316	133	70	6	24	152	53	161	0.15	28.5
sp|P74063|YCF3_SYNY3	WP_138073582.1	21.739	115	73	2	38	152	98	195	0.38	27.3
sp|P74063|YCF3_SYNY3	WP_065711483.1	32.222	90	56	3	38	125	164	250	0.005	32.7
sp|P74063|YCF3_SYNY3	WP_065711483.1	22.840	162	86	5	22	155	46	196	0.074	29.6
sp|P74063|YCF3_SYNY3	WP_062434815.1	26.190	84	59	1	38	121	103	183	0.007	32.7
sp|P74063|YCF3_SYNY3	WP_138071559.1	27.273	77	49	2	50	124	162	233	0.023	31.2
sp|P74063|YCF3_SYNY3	WP_168191150.1	33.333	51	27	1	86	136	43	86	0.14	28.1
sp|P74063|YCF3_SYNY3	WP_168191150.1	30.357	56	33	2	52	103	82	135	0.34	26.9
sp|P74063|YCF3_SYNY3	WP_138073746.1	28.049	82	46	3	21	96	304	378	0.22	28.1
sp|P74063|YCF3_SYNY3	WP_012307776.1	22.222	153	93	4	3	153	31	159	0.48	26.9
Cytochrome b6f proteins
sll1316	P26290	cytochrome b6-f complex iron-sulfur subunit (Rieske iron sulfur protein)	petC1	petC, petC1	Cytochrome b6/f complex	Photosynthesis & Respiration	TM		19	1
BLAST Output	PCC 11901 Accession	Percentage Identity	Alignment Length	Mismatches	Gap Open	Synechocystis sp. PCC 6803 Start	Synechocystis sp. PCC 6803 End	PCC 11901 Start	PCC 11901 End	E-value	Bit Score
sp|P26290|UCRIB_SYNY3	WP_012307519.1	75.556	180	44	0	1	180	1	180	1.74e-101	286
sp|P26290|UCRIB_SYNY3	WP_138073887.1	46.784	171	89	2	9	179	8	176	8.61e-56	171
sp|P26290|UCRIB_SYNY3	WP_138073146.1	36.765	68	42	1	103	170	356	422	1.38e-09	52.8
sp|P26290|UCRIB_SYNY3	WP_138072963.1	26.174	149	86	7	13	148	1	138	2.44e-08	47.8
sp|P26290|UCRIB_SYNY3	WP_062433810.1	30.769	39	27	0	61	99	61	99	0.17	28.5
sll1317	P26287	apocytochrome f, component of cytochrome b6/f complex	petA	petA	Cytochrome b6/f complex	Photosynthesis & Respiration	TM		35.2	1
BLAST Output	PCC 11901 Accession	Percentage Identity	Alignment Length	Mismatches	Gap Open	Synechocystis sp. PCC 6803 Start	Synechocystis sp. PCC 6803 End	PCC 11901 Start	PCC 11901 End	E-value	Bit Score
sp|P26287|CYF_SYNY3	WP_138073508.1	68.827	324	97	1	1	324	1	320	6.10e-164	456
slr0342	Q57038	cytochrome b6	petB	petB	Cytochrome b6/f complex	Photosynthesis & Respiration	TM		25	4
BLAST Output	PCC 11901 Accession	Percentage Identity	Alignment Length	Mismatches	Gap Open	Synechocystis sp. PCC 6803 Start	Synechocystis sp. PCC 6803 End	PCC 11901 Start	PCC 11901 End	E-value	Bit Score
sp|Q57038|CYB6_SYNY3	WP_012306470.1	86.486	222	30	0	1	222	1	222	2.06e-150	414
slr0343	P27589	cytochrome b6-f complex subunit 4	petD	petD, slr0343	Cytochrome b6/f complex	Photosynthesis & Respiration	TM		17.4	3
BLAST Output	PCC 11901 Accession	Percentage Identity	Alignment Length	Mismatches	Gap Open	Synechocystis sp. PCC 6803 Start	Synechocystis sp. PCC 6803 End	PCC 11901 Start	PCC 11901 End	E-value	Bit Score
sp|P27589|PETD_SYNY3	WP_012306469.1	85.000	160	24	0	1	160	1	160	1.11e-99	280
slr1185	P74714	cytochrome b6-f complex alternative iron-sulfur subunit (Rieske iron sulfur protein)	petC2	petC2, petC	Cytochrome b6/f complex	Photosynthesis & Respiration
BLAST Output	PCC 11901 Accession	Percentage Identity	Alignment Length	Mismatches	Gap Open	Synechocystis sp. PCC 6803 Start	Synechocystis sp. PCC 6803 End	PCC 11901 Start	PCC 11901 End	E-value	Bit Score
sp|P74714|UCRIA_SYNY3	WP_138073887.1	64.045	178	63	1	1	178	1	177	4.77e-83	239
sp|P74714|UCRIA_SYNY3	WP_012307519.1	50.000	170	82	3	10	177	11	179	4.87e-51	159
sp|P74714|UCRIA_SYNY3	WP_138072963.1	27.848	158	98	7	13	161	2	152	2.41e-07	44.7
sp|P74714|UCRIA_SYNY3	WP_138073146.1	40.678	59	33	2	102	159	356	413	8.02e-07	44.7
sp|P74714|UCRIA_SYNY3	WP_138071850.1	42.857	21	12	0	114	134	312	332	0.84	26.6
sml0004	P72717	cytochrome b6-f complex subunit VIII	petN	petN, ycf6, sml0004	Cytochrome b6/f complex	Photosynthesis & Respiration
BLAST Output	PCC 11901 Accession	Percentage Identity	Alignment Length	Mismatches	Gap Open	Synechocystis sp. PCC 6803 Start	Synechocystis sp. PCC 6803 End	PCC 11901 Start	PCC 11901 End	E-value	Bit Score
sp|P72717|PETN_SYNY3	WP_071819460.1	72.414	29	8	0	1	29	1	29	2.31e-11	47.8
smr0003	P74810	cytochrome b6-f complex subunit PetM	petM	petM, smr0003	Cytochrome b6/f complex	Photosynthesis & Respiration
BLAST Output	PCC 11901 Accession	Percentage Identity	Alignment Length	Mismatches	Gap Open	Synechocystis sp. PCC 6803 Start	Synechocystis sp. PCC 6803 End	PCC 11901 Start	PCC 11901 End	E-value	Bit Score
sp|P74810|PETM_SYNY3	WP_012306931.1	52.941	34	16	0	1	34	1	34	1.31e-07	38.5
sp|P74810|PETM_SYNY3	WP_138072816.1	36.364	33	20	1	4	36	98	129	0.67	22.3
sp|P74810|PETM_SYNY3	WP_138073862.1	43.478	23	13	0	5	27	47	69	0.92	21.9
smr0010	P74149	cytochrome b6-f complex subunit 5	petG	petG, smr0010	Cytochrome b6/f complex	Photosynthesis & Respiration
BLAST Output	PCC 11901 Accession	Percentage Identity	Alignment Length	Mismatches	Gap Open	Synechocystis sp. PCC 6803 Start	Synechocystis sp. PCC 6803 End	PCC 11901 Start	PCC 11901 End	E-value	Bit Score
sp|P74149|PETG_SYNY3	WP_012306008.1	86.842	38	5	0	1	38	1	38	3.22e-11	47.8
sp|P74149|PETG_SYNY3	WP_138071616.1	25.000	32	24	0	1	32	1	32	0.34	23.5
sp|P74149|PETG_SYNY3	WP_138073539.1	38.462	26	16	0	3	28	95	120	0.51	23.1
Electron transport proteins
sll0199	P21697	plastocyanin	petE	petE	Soluble electron carriers	Photosynthesis & Respiration	Soluble proteins		13.1	0
BLAST Output	PCC 11901 Accession	Percentage Identity	Alignment Length	Mismatches	Gap Open	Synechocystis sp. PCC 6803 Start	Synechocystis sp. PCC 6803 End	PCC 11901 Start	PCC 11901 End	E-value	Bit Score
sp|P21697|PLAS_SYNY3	WP_138073168.1	26.087	138	76	5	13	125	14	150	0.027	29.6
sll1796	P46445	cytochrome c553	petJ	petJ, sll1796	Soluble electron carriers	Photosynthesis & Respiration
BLAST Output	PCC 11901 Accession	Percentage Identity	Alignment Length	Mismatches	Gap Open	Synechocystis sp. PCC 6803 Start	Synechocystis sp. PCC 6803 End	PCC 11901 Start	PCC 11901 End	E-value	Bit Score
sp|P46445|CYC6_SYNY3	WP_012305805.1	49.524	105	46	1	20	117	9	113	1.50e-22	82.0
sp|P46445|CYC6_SYNY3	WP_138071363.1	36.634	101	64	0	20	120	13	113	9.22e-18	69.7
sp|P46445|CYC6_SYNY3	WP_012305751.1	26.263	99	54	2	38	117	59	157	2.94e-07	43.5
sp|P46445|CYC6_SYNY3	WP_012306009.1	29.565	115	64	4	9	112	13	121	7.23e-05	36.2
ssl0020	P27320	ferredoxin I, essential for growth	petF	petF, fed1, fedI, fed, ssl0020, fdx I	Soluble electron carriers	Photosynthesis & Respiration	Soluble proteins		10.4	0
BLAST Output	PCC 11901 Accession	Percentage Identity	Alignment Length	Mismatches	Gap Open	Synechocystis sp. PCC 6803 Start	Synechocystis sp. PCC 6803 End	PCC 11901 Start	PCC 11901 End	E-value	Bit Score
sp|P27320|FER_SYNY3	WP_012307922.1	76.289	97	23	0	1	97	1	97	2.81e-50	150
sp|P27320|FER_SYNY3	WP_138071284.1	68.041	97	31	0	1	97	1	97	2.50e-48	145
sp|P27320|FER_SYNY3	WP_012307792.1	43.158	95	54	0	3	97	4	98	1.75e-20	75.5
sp|P27320|FER_SYNY3	WP_012306254.1	38.961	77	47	0	21	97	24	100	3.64e-18	70.1
sp|P27320|FER_SYNY3	WP_138073724.1	36.842	57	32	2	9	64	6	59	0.023	29.3
sp|P27320|FER_SYNY3	WP_012307806.1	33.333	24	16	0	25	48	23	46	0.37	25.0
sp|P27320|FER_SYNY3	WP_138073544.1	37.500	24	15	0	5	28	186	209	0.52	25.4
sll0248	P27319	flavodoxin	isiB	isiB, fla	Soluble electron carriers	Photosynthesis & Respiration	Soluble proteins		18.8	0
BLAST Output	PCC 11901 Accession	Percentage Identity	Alignment Length	Mismatches	Gap Open	Synechocystis sp. PCC 6803 Start	Synechocystis sp. PCC 6803 End	PCC 11901 Start	PCC 11901 End	E-value	Bit Score
sp|P27319|FLAV_SYNY3	WP_030006508.1	68.675	166	52	0	1	166	1	166	5.42e-88	251
sp|P27319|FLAV_SYNY3	WP_138073426.1	27.119	59	38	2	4	57	260	318	0.98	26.2
slr1643	Q55318	ferredoxin-NADP oxidoreductase	petH	petH	Soluble electron carriers	Photosynthesis & Respiration	Soluble proteins		46.3	0
BLAST Output	PCC 11901 Accession	Percentage Identity	Alignment Length	Mismatches	Gap Open	Synechocystis sp. PCC 6803 Start	Synechocystis sp. PCC 6803 End	PCC 11901 Start	PCC 11901 End	E-value	Bit Score
sp|Q55318|FENR_SYNY3	WP_012306481.1	65.060	415	130	5	1	413	1	402	0.0	547
sp|Q55318|FENR_SYNY3	WP_012307811.1	61.538	65	25	0	14	78	9	73	3.51e-22	86.7
sp|Q55318|FENR_SYNY3	WP_012307810.1	37.333	75	39	3	2	75	220	287	3.46e-05	41.6
sp|Q55318|FENR_SYNY3	WP_012307202.1	35.526	76	43	2	132	204	10	82	0.008	33.9
sp|Q55318|FENR_SYNY3	WP_138073344.1	30.435	138	69	6	71	186	680	812	0.064	32.0
sll0550	Q55393	flavoprotein		flv3, flv	Flavoproteins	Other Categories	Soluble proteins		63.5	0
BLAST Output	PCC 11901 Accession	Percentage Identity	Alignment Length	Mismatches	Gap Open	Synechocystis sp. PCC 6803 Start	Synechocystis sp. PCC 6803 End	PCC 11901 Start	PCC 11901 End	E-value	Bit Score
sp|Q55393|DFA1_SYNY3	WP_138073186.1	72.396	576	156	2	1	573	1	576	0.0	896
sp|Q55393|DFA1_SYNY3	WP_138073426.1	45.660	576	299	6	7	573	6	576	8.91e-179	514
sp|Q55393|DFA1_SYNY3	WP_030005834.1	28.125	128	90	2	431	557	18	144	1.53e-12	62.4
sp|Q55393|DFA1_SYNY3	WP_138071113.1	33.750	80	43	4	274	353	170	239	0.14	31.6
sp|Q55393|DFA1_SYNY3	WP_012305904.1	30.909	55	34	1	30	84	336	386	0.47	29.6
sll1521	P74373	flavoprotein		flv1, flv	Flavoproteins	Other Categories	Soluble proteins		65.1	0
BLAST Output	PCC 11901 Accession	Percentage Identity	Alignment Length	Mismatches	Gap Open	Synechocystis sp. PCC 6803 Start	Synechocystis sp. PCC 6803 End	PCC 11901 Start	PCC 11901 End	E-value	Bit Score
sp|P74373|DFA3_SYNY3	WP_138073426.1	67.770	574	180	4	26	597	6	576	0.0	816
sp|P74373|DFA3_SYNY3	WP_138073186.1	42.059	573	317	5	30	597	14	576	5.67e-170	492
sp|P74373|DFA3_SYNY3	WP_030005834.1	33.051	118	77	2	455	571	17	133	8.72e-16	71.6
sp|P74373|DFA3_SYNY3	WP_168191081.1	55.172	29	12	1	93	121	26	53	0.12	28.5
sp|P74373|DFA3_SYNY3	WP_138073193.1	25.000	128	72	4	208	329	206	315	0.71	28.9
sp|P74373|DFA3_SYNY3	WP_138073074.1	24.615	65	48	1	510	573	116	180	0.96	28.5
sll0217	P72723	flavoprotein		flv4, flv, flv3, sll0217, dfa2	Flavoproteins	Other Categories
BLAST Output	PCC 11901 Accession	Percentage Identity	Alignment Length	Mismatches	Gap Open	Synechocystis sp. PCC 6803 Start	Synechocystis sp. PCC 6803 End	PCC 11901 Start	PCC 11901 End	E-value	Bit Score
sp|P72723|DFA2_SYNY3	WP_138073186.1	58.464	573	235	2	9	578	4	576	0.0	717
sp|P72723|DFA2_SYNY3	WP_138073426.1	41.840	576	326	5	11	578	2	576	5.02e-153	448
sp|P72723|DFA2_SYNY3	WP_030005834.1	31.304	115	77	2	435	548	17	130	4.62e-13	63.9
sll0219	P72721	flavoprotein		flv2, sll0218, flv, sll0219, dfa4	Flavoproteins	Other Categories
BLAST Output	PCC 11901 Accession	Percentage Identity	Alignment Length	Mismatches	Gap Open	Synechocystis sp. PCC 6803 Start	Synechocystis sp. PCC 6803 End	PCC 11901 Start	PCC 11901 End	E-value	Bit Score
sp|P72721|DFA4_SYNY3	WP_138073426.1	51.820	577	272	4	21	594	3	576	0.0	610
sp|P72721|DFA4_SYNY3	WP_138073186.1	35.552	571	356	7	28	594	14	576	6.59e-128	384
sp|P72721|DFA4_SYNY3	WP_030005834.1	28.571	112	77	3	465	574	31	141	2.07e-08	50.4
sp|P72721|DFA4_SYNY3	WP_138073390.1	21.212	132	96	2	234	362	208	334	0.69	28.9
sll1220	P74025	putative diaphorase subunit of the bidirectional hydrogenase	hoxE	hoxE, sll1220	Hydrogenase	Other Categories	Soluble proteins		18.7	0
BLAST Output	PCC 11901 Accession	Percentage Identity	Alignment Length	Mismatches	Gap Open	Synechocystis sp. PCC 6803 Start	Synechocystis sp. PCC 6803 End	PCC 11901 Start	PCC 11901 End	E-value	Bit Score
tr|P74025|P74025_SYNY3	WP_012305832.1	72.903	155	42	0	19	173	9	163	1.14e-84	243
tr|P74025|P74025_SYNY3	WP_138073022.1	32.558	43	27	1	111	151	539	581	0.55	27.3
sll1221	P74024	diaphorase subunit of the bidirectional hydrogenase	hoxF	hoxF, sll1221	Hydrogenase	Other Categories	Soluble proteins		57.7	0
BLAST Output	PCC 11901 Accession	Percentage Identity	Alignment Length	Mismatches	Gap Open	Synechocystis sp. PCC 6803 Start	Synechocystis sp. PCC 6803 End	PCC 11901 Start	PCC 11901 End	E-value	Bit Score
tr|P74024|P74024_SYNY3	WP_138072146.1	69.418	533	154	3	2	531	3	529	0.0	744
tr|P74024|P74024_SYNY3	WP_138073364.1	24.658	73	55	0	21	93	130	202	7.12e-04	37.7
tr|P74024|P74024_SYNY3	WP_181445675.1	38.710	62	35	1	37	95	12	73	0.037	31.6
tr|P74024|P74024_SYNY3	WP_138072029.1	26.087	115	60	4	47	153	63	160	0.82	28.5
sll1224	P74021	hydrogenase subunit of the bidirectional hydrogenase	hoxY	hoxY, sll1224	Hydrogenase	Other Categories	Soluble proteins		19.9	0
BLAST Output	PCC 11901 Accession	Percentage Identity	Alignment Length	Mismatches	Gap Open	Synechocystis sp. PCC 6803 Start	Synechocystis sp. PCC 6803 End	PCC 11901 Start	PCC 11901 End	E-value	Bit Score
tr|P74021|P74021_SYNY3	WP_138072150.1	64.286	182	62	2	3	182	8	188	3.82e-80	233
tr|P74021|P74021_SYNY3	WP_012308341.1	24.051	158	75	7	5	158	46	162	0.016	31.6
tr|P74021|P74021_SYNY3	WP_012308133.1	34.286	35	22	1	60	93	54	88	0.32	27.7
tr|P74021|P74021_SYNY3	WP_012305738.1	33.333	42	25	1	142	180	135	176	0.50	26.9
sll1226	P74018	hydrogenase subunit of the bidirectional hydrogenase	hoxH	hoxH, sll1226	Hydrogenase	Other Categories	Soluble proteins		52.9	0
BLAST Output	PCC 11901 Accession	Percentage Identity	Alignment Length	Mismatches	Gap Open	Synechocystis sp. PCC 6803 Start	Synechocystis sp. PCC 6803 End	PCC 11901 Start	PCC 11901 End	E-value	Bit Score
tr|P74018|P74018_SYNY3	WP_138072152.1	67.089	474	155	1	1	474	1	473	0.0	690
tr|P74018|P74018_SYNY3	WP_138071906.1	22.472	178	96	8	49	219	9	151	0.39	29.6
sll1223	P74022	diaphorase subunit of the bidirectional hydrogenase	hoxU	hoxU, sll1223	Hydrogenase	Other Categories
BLAST Output	PCC 11901 Accession	Percentage Identity	Alignment Length	Mismatches	Gap Open	Synechocystis sp. PCC 6803 Start	Synechocystis sp. PCC 6803 End	PCC 11901 Start	PCC 11901 End	E-value	Bit Score
tr|P74022|P74022_SYNY3	WP_138072148.1	75.210	238	59	0	1	238	1	238	3.98e-140	389
tr|P74022|P74022_SYNY3	WP_062433090.1	28.866	97	59	4	115	205	25	117	0.001	35.8
tr|P74022|P74022_SYNY3	WP_012307806.1	27.273	77	44	4	9	81	11	79	0.031	29.6
tr|P74022|P74022_SYNY3	WP_138073334.1	40.909	22	13	0	187	208	20	41	0.11	30.0
tr|P74022|P74022_SYNY3	WP_012307203.1	31.250	80	41	5	145	219	8	78	0.13	28.1
tr|P74022|P74022_SYNY3	WP_138073530.1	56.250	16	7	0	192	207	187	202	0.22	28.9
tr|P74022|P74022_SYNY3	WP_012307405.1	33.333	33	22	0	190	222	82	114	0.37	27.3
tr|P74022|P74022_SYNY3	WP_012306860.1	30.952	42	28	1	177	217	31	72	0.38	26.6
tr|P74022|P74022_SYNY3	WP_138073249.1	25.641	78	34	2	144	203	686	757	0.40	28.5
tr|P74022|P74022_SYNY3	WP_138073720.1	36.667	30	19	0	190	219	132	161	0.60	27.7
tr|P74022|P74022_SYNY3	WP_138073270.1	40.909	22	13	0	137	158	618	639	0.86	27.3
sll0322	Q55638	putative hydrogenase expression/formation protein HypF	hypF	hypF	Hydrogenase biosynthesis/degradation	Other Categories	Soluble proteins		85.3	0
BLAST Output	PCC 11901 Accession	Percentage Identity	Alignment Length	Mismatches	Gap Open	Synechocystis sp. PCC 6803 Start	Synechocystis sp. PCC 6803 End	PCC 11901 Start	PCC 11901 End	E-value	Bit Score
sp|Q55638|HYPF_SYNY3	WP_138072160.1	48.790	785	348	11	1	758	1	758	0.0	718
sp|Q55638|HYPF_SYNY3	WP_138072094.1	28.409	88	59	2	520	604	15	101	0.015	33.1
sp|Q55638|HYPF_SYNY3	WP_030006628.1	23.529	119	88	2	640	755	258	376	0.53	30.0
sp|Q55638|HYPF_SYNY3	WP_138073142.1	24.026	154	97	7	240	385	41	182	0.86	28.5
sll1432	P74218	putative hydrogenase expression/formation protein HypB	hypB	hypB, hypB1	Hydrogenase biosynthesis/degradation	Other Categories	Soluble proteins		31.2	0
BLAST Output	PCC 11901 Accession	Percentage Identity	Alignment Length	Mismatches	Gap Open	Synechocystis sp. PCC 6803 Start	Synechocystis sp. PCC 6803 End	PCC 11901 Start	PCC 11901 End	E-value	Bit Score
sp|P74218|HYPB_SYNY3	WP_138072158.1	49.823	283	131	2	1	282	1	273	4.23e-92	271
sp|P74218|HYPB_SYNY3	WP_065710880.1	44.811	212	113	1	63	270	8	219	1.51e-62	194
sp|P74218|HYPB_SYNY3	WP_138073579.1	21.693	189	134	3	98	274	13	199	1.17e-06	44.7
sp|P74218|HYPB_SYNY3	WP_138072182.1	28.767	73	42	2	122	185	31	102	0.19	29.3
sp|P74218|HYPB_SYNY3	WP_138072270.1	35.185	54	32	2	225	277	156	207	0.38	28.5
sp|P74218|HYPB_SYNY3	WP_012305824.1	41.860	43	24	1	192	234	46	87	0.58	27.7
sll1462	P73438	putative hydrogenase expression/formation protein HypE	hypE	hypE	Hydrogenase biosynthesis/degradation	Other Categories	Soluble proteins		36.4	0
BLAST Output	PCC 11901 Accession	Percentage Identity	Alignment Length	Mismatches	Gap Open	Synechocystis sp. PCC 6803 Start	Synechocystis sp. PCC 6803 End	PCC 11901 Start	PCC 11901 End	E-value	Bit Score
tr|P73438|P73438_SYNY3	WP_138072144.1	57.020	349	145	2	1	345	1	348	4.45e-138	392
tr|P73438|P73438_SYNY3	WP_138073151.1	26.923	312	192	13	21	313	11	305	4.92e-07	47.4
tr|P73438|P73438_SYNY3	WP_138071796.1	24.309	362	212	13	1	315	377	723	0.001	37.4
tr|P73438|P73438_SYNY3	WP_138072295.1	25.150	167	104	5	86	233	86	250	0.004	35.0
tr|P73438|P73438_SYNY3	WP_168191166.1	26.667	165	103	5	161	320	145	296	0.12	30.4
tr|P73438|P73438_SYNY3	WP_138072629.1	65.000	20	7	0	173	192	42	61	0.18	29.6
tr|P73438|P73438_SYNY3	WP_138073304.1	46.429	28	11	1	110	137	166	189	0.68	27.7
tr|P73438|P73438_SYNY3	WP_099237976.1	60.000	20	8	0	288	307	49	68	0.96	26.9
slr1498	P72620	putative hydrogenase expression/formation protein HypD	hypD	hypD	Hydrogenase biosynthesis/degradation	Other Categories	Soluble proteins		40.6	0
BLAST Output	PCC 11901 Accession	Percentage Identity	Alignment Length	Mismatches	Gap Open	Synechocystis sp. PCC 6803 Start	Synechocystis sp. PCC 6803 End	PCC 11901 Start	PCC 11901 End	E-value	Bit Score
tr|P72620|P72620_SYNY3	WP_138072162.1	63.989	361	129	1	1	361	1	360	1.08e-178	497
ssl3580	P74095	putative hydrogenase expression/formation protein HypC	hypC	hypC	Hydrogenase biosynthesis/degradation	Other Categories	Soluble proteins		8	0
BLAST Output	PCC 11901 Accession	Percentage Identity	Alignment Length	Mismatches	Gap Open	Synechocystis sp. PCC 6803 Start	Synechocystis sp. PCC 6803 End	PCC 11901 Start	PCC 11901 End	E-value	Bit Score
sp|P74095|HYPC_SYNY3	WP_045441432.1	56.757	74	31	1	1	74	1	73	6.20e-28	93.2
sp|P74095|HYPC_SYNY3	WP_138073186.1	37.209	43	27	0	5	47	533	575	0.63	24.6
slr1675	P74263	putative hydrogenase expression/formation protein HypA1	hypA1	hypA1, hypA, slr1675	Hydrogenase biosynthesis/degradation	Other Categories
BLAST Output	PCC 11901 Accession	Percentage Identity	Alignment Length	Mismatches	Gap Open	Synechocystis sp. PCC 6803 Start	Synechocystis sp. PCC 6803 End	PCC 11901 Start	PCC 11901 End	E-value	Bit Score
sp|P74263|HYPA1_SYNY3	WP_138072156.1	49.107	112	57	0	1	112	1	112	9.24e-38	120
sp|P74263|HYPA1_SYNY3	WP_138073428.1	26.957	115	82	2	1	113	1	115	7.65e-10	49.3
sp|P74263|HYPA1_SYNY3	WP_138073042.1	34.615	52	28	2	47	94	427	476	0.034	29.3
sp|P74263|HYPA1_SYNY3	WP_012308248.1	37.037	27	17	0	24	50	128	154	0.51	25.8
ssr2016	P73358	hypothetical protein		pgr5, ssr2016	Possible FQR	Photosynthesis & Respiration
BLAST Output	PCC 11901 Accession	Percentage Identity	Alignment Length	Mismatches	Gap Open	Synechocystis sp. PCC 6803 Start	Synechocystis sp. PCC 6803 End	PCC 11901 Start	PCC 11901 End	E-value	Bit Score
tr|P73358|P73358_SYNY3	WP_012307091.1	67.692	65	21	0	1	65	1	65	4.96e-30	97.4
tr|P73358|P73358_SYNY3	WP_138072822.1	37.255	51	30	2	11	61	97	145	1.27e-04	34.3
sll1245	P42351	cytochrome cM	cytM	cytM	Soluble electron carriers	Photosynthesis & Respiration
BLAST Output	PCC 11901 Accession	Percentage Identity	Alignment Length	Mismatches	Gap Open	Synechocystis sp. PCC 6803 Start	Synechocystis sp. PCC 6803 End	PCC 11901 Start	PCC 11901 End	E-value	Bit Score
sp|P42351|C55L_SYNY3	WP_012306009.1	60.952	105	38	1	4	105	20	124	2.63e-42	132
sp|P42351|C55L_SYNY3	WP_138071363.1	52.381	21	10	0	29	49	26	46	0.034	28.5
Other ferredoxins
sll0662	Q55980	4Fe-4S type iron-sulfur protein		fed7	Putative ferredoxins	Photosynthesis & Respiration	Soluble proteins		15.1	0
BLAST Output	PCC 11901 Accession	Percentage Identity	Alignment Length	Mismatches	Gap Open	Synechocystis sp. PCC 6803 Start	Synechocystis sp. PCC 6803 End	PCC 11901 Start	PCC 11901 End	E-value	Bit Score
tr|Q55980|Q55980_SYNY3	WP_138072810.1	71.795	117	33	0	12	128	8	124	1.19e-59	177
tr|Q55980|Q55980_SYNY3	WP_030006946.1	20.755	106	76	2	16	120	40	138	0.49	26.2
sll1382	P74159	ferredoxin, petF-like protein	petF, fdx	petF, fdx, fedII, fdx II	Putative ferredoxins	Photosynthesis & Respiration	Soluble proteins		13.8	0
BLAST Output	PCC 11901 Accession	Percentage Identity	Alignment Length	Mismatches	Gap Open	Synechocystis sp. PCC 6803 Start	Synechocystis sp. PCC 6803 End	PCC 11901 Start	PCC 11901 End	E-value	Bit Score
tr|P74159|P74159_SYNY3	WP_012306254.1	65.574	122	42	0	1	122	1	122	4.84e-60	177
tr|P74159|P74159_SYNY3	WP_012307792.1	43.396	106	58	1	1	106	1	104	2.86e-28	96.3
tr|P74159|P74159_SYNY3	WP_138071284.1	43.820	89	50	0	12	100	9	97	1.03e-24	87.0
tr|P74159|P74159_SYNY3	WP_012307922.1	41.237	97	55	1	4	100	3	97	4.92e-23	82.8
tr|P74159|P74159_SYNY3	WP_012307806.1	26.415	53	37	1	7	59	4	54	0.24	26.2
slr0148	P74447	hypothetical protein		fdx, slr0148	Putative ferredoxins	Photosynthesis & Respiration	Soluble proteins		17.8	0
BLAST Output	PCC 11901 Accession	Percentage Identity	Alignment Length	Mismatches	Gap Open	Synechocystis sp. PCC 6803 Start	Synechocystis sp. PCC 6803 End	PCC 11901 Start	PCC 11901 End	E-value	Bit Score
tr|P74447|P74447_SYNY3	WP_030007395.1	43.165	139	79	0	31	169	4	142	1.58e-42	137
tr|P74447|P74447_SYNY3	WP_138071726.1	32.857	140	93	1	31	169	27	166	1.18e-22	86.3
tr|P74447|P74447_SYNY3	WP_012307752.1	43.333	60	31	1	63	122	42	98	2.44e-06	41.2
tr|P74447|P74447_SYNY3	WP_012305886.1	32.000	75	39	3	46	112	17	87	0.020	30.4
tr|P74447|P74447_SYNY3	WP_138072031.1	30.357	56	30	1	126	181	39	85	0.36	27.7
sll1584	P73195	ferredoxin like protein			Putative ferredoxins	Photosynthesis & Respiration	Unknown		15.5	0
BLAST Output	PCC 11901 Accession	Percentage Identity	Alignment Length	Mismatches	Gap Open	Synechocystis sp. PCC 6803 Start	Synechocystis sp. PCC 6803 End	PCC 11901 Start	PCC 11901 End	E-value	Bit Score
tr|P73195|P73195_SYNY3	WP_012308118.1	64.035	114	40	1	18	131	14	126	4.66e-54	163
tr|P73195|P73195_SYNY3	WP_181445675.1	25.926	108	62	3	25	130	1	92	6.38e-09	47.8
tr|P73195|P73195_SYNY3	WP_138073364.1	27.778	36	26	0	80	115	171	206	0.081	28.5
slr2059	P73811	iron-sulfur cluster binding protein homolog			Putative ferredoxins	Photosynthesis & Respiration	Unknown		14.8	0
BLAST Output	PCC 11901 Accession	Percentage Identity	Alignment Length	Mismatches	Gap Open	Synechocystis sp. PCC 6803 Start	Synechocystis sp. PCC 6803 End	PCC 11901 Start	PCC 11901 End	E-value	Bit Score
tr|P73811|P73811_SYNY3	WP_012307405.1	78.358	134	29	0	1	134	1	134	1.17e-78	225
tr|P73811|P73811_SYNY3	WP_012306860.1	55.000	20	9	0	79	98	41	60	0.071	27.7
tr|P73811|P73811_SYNY3	WP_138073249.1	21.622	74	33	2	80	128	686	759	0.071	29.3
tr|P73811|P73811_SYNY3	WP_138073249.1	38.095	21	13	0	77	97	739	759	0.52	26.6
tr|P73811|P73811_SYNY3	WP_062433090.1	33.333	42	27	1	60	101	81	121	0.11	28.1
tr|P73811|P73811_SYNY3	WP_062433090.1	38.095	21	13	0	107	127	56	76	0.52	26.2
tr|P73811|P73811_SYNY3	WP_062433090.1	16.842	95	60	2	56	131	26	120	0.73	25.8
tr|P73811|P73811_SYNY3	WP_138072039.1	22.642	106	67	3	1	99	128	225	0.15	28.1
tr|P73811|P73811_SYNY3	WP_138073282.1	35.185	54	31	2	27	76	145	198	0.16	28.1
tr|P73811|P73811_SYNY3	WP_138073270.1	40.000	20	12	0	115	134	629	648	0.17	28.1
tr|P73811|P73811_SYNY3	WP_138073530.1	38.889	36	18	1	99	134	175	206	0.18	27.7
tr|P73811|P73811_SYNY3	WP_138073720.1	36.957	46	22	3	90	134	115	154	0.53	26.2
tr|P73811|P73811_SYNY3	WP_138073334.1	40.000	30	16	1	67	96	10	37	0.86	25.8
ssl2559	P73171	ferredoxin		fdx6	Putative ferredoxins	Photosynthesis & Respiration	Unknown		10.7	0
BLAST Output	PCC 11901 Accession	Percentage Identity	Alignment Length	Mismatches	Gap Open	Synechocystis sp. PCC 6803 Start	Synechocystis sp. PCC 6803 End	PCC 11901 Start	PCC 11901 End	E-value	Bit Score
tr|P73171|P73171_SYNY3	WP_012305886.1	35.849	53	33	1	42	93	44	96	3.98e-08	43.9
tr|P73171|P73171_SYNY3	WP_030007395.1	35.106	94	54	5	1	90	1	91	2.23e-06	40.4
tr|P73171|P73171_SYNY3	WP_012307752.1	37.736	53	27	3	42	91	46	95	0.004	30.8
tr|P73171|P73171_SYNY3	WP_138071726.1	46.512	43	20	2	42	81	63	105	0.008	30.4
tr|P73171|P73171_SYNY3	WP_012306254.1	32.836	67	36	4	35	98	39	99	0.010	30.0
tr|P73171|P73171_SYNY3	WP_138071742.1	26.316	57	38	1	14	66	136	192	0.77	25.0
ssl3044	P74283	probable ferredoxin		ssl3044	Putative ferredoxins	Photosynthesis & Respiration	Unknown		10.8	0
BLAST Output	PCC 11901 Accession	Percentage Identity	Alignment Length	Mismatches	Gap Open	Synechocystis sp. PCC 6803 Start	Synechocystis sp. PCC 6803 End	PCC 11901 Start	PCC 11901 End	E-value	Bit Score
tr|P74283|P74283_SYNY3	WP_012307752.1	72.632	95	26	0	3	97	4	98	4.62e-49	147
tr|P74283|P74283_SYNY3	WP_012305886.1	40.860	93	52	2	2	93	3	93	5.80e-14	59.3
tr|P74283|P74283_SYNY3	WP_138071726.1	46.000	50	24	1	41	87	59	108	3.65e-10	50.4
tr|P74283|P74283_SYNY3	WP_030007395.1	40.323	62	34	1	41	99	36	97	7.72e-08	44.3
slr0150	P74449	ferredoxin, petF-like protein	petF, fdx	petF, fdx, fdx IV	Putative ferredoxins	Photosynthesis & Respiration
BLAST Output	PCC 11901 Accession	Percentage Identity	Alignment Length	Mismatches	Gap Open	Synechocystis sp. PCC 6803 Start	Synechocystis sp. PCC 6803 End	PCC 11901 Start	PCC 11901 End	E-value	Bit Score
tr|P74449|P74449_SYNY3	WP_138071284.1	51.000	100	45	2	3	102	2	97	1.72e-31	103
tr|P74449|P74449_SYNY3	WP_012307922.1	42.000	100	54	2	3	102	2	97	1.60e-23	83.2
tr|P74449|P74449_SYNY3	WP_012306254.1	32.353	102	67	1	1	102	1	100	5.13e-16	65.1
tr|P74449|P74449_SYNY3	WP_012307792.1	37.255	102	60	2	1	102	1	98	3.27e-15	62.4
tr|P74449|P74449_SYNY3	WP_012307806.1	36.364	44	28	0	16	59	11	54	0.001	32.3
slr1828	P73388	ferredoxin, petF-like protein	petF, fdx	petF, fdx, slr1828, fdx III	Putative ferredoxins	Photosynthesis & Respiration
BLAST Output	PCC 11901 Accession	Percentage Identity	Alignment Length	Mismatches	Gap Open	Synechocystis sp. PCC 6803 Start	Synechocystis sp. PCC 6803 End	PCC 11901 Start	PCC 11901 End	E-value	Bit Score
tr|P73388|P73388_SYNY3	WP_012307792.1	65.049	103	36	0	1	103	1	103	2.42e-48	146
tr|P73388|P73388_SYNY3	WP_012306254.1	44.762	105	56	1	1	103	1	105	2.93e-30	101
tr|P73388|P73388_SYNY3	WP_138071284.1	45.783	83	45	0	16	98	15	97	3.05e-23	82.8
tr|P73388|P73388_SYNY3	WP_012307922.1	44.872	78	43	0	21	98	20	97	1.17e-19	73.6
tr|P73388|P73388_SYNY3	WP_138072148.1	39.474	38	17	1	18	49	13	50	0.082	28.1
tr|P73388|P73388_SYNY3	WP_065711140.1	33.333	21	14	0	1	21	1	21	0.32	25.4
tr|P73388|P73388_SYNY3	WP_138072968.1	30.952	42	23	1	15	50	21	62	0.32	26.2
tr|P73388|P73388_SYNY3	WP_012307806.1	22.449	49	38	0	9	57	6	54	0.37	25.4
ssr3184	P73649	4Fe-4S type iron-sulfur protein		petF, ssr3184, fdx8	Putative ferredoxins	Photosynthesis & Respiration
BLAST Output	PCC 11901 Accession	Percentage Identity	Alignment Length	Mismatches	Gap Open	Synechocystis sp. PCC 6803 Start	Synechocystis sp. PCC 6803 End	PCC 11901 Start	PCC 11901 End	E-value	Bit Score
tr|P73649|P73649_SYNY3	WP_012306860.1	77.027	74	17	0	1	74	1	74	4.27e-40	123
tr|P73649|P73649_SYNY3	WP_138073249.1	37.500	48	17	3	21	57	656	701	0.002	32.0
tr|P73649|P73649_SYNY3	WP_138073249.1	36.364	22	14	0	46	67	746	767	0.022	28.5
tr|P73649|P73649_SYNY3	WP_062433090.1	33.333	57	30	2	16	66	70	124	0.004	30.4
tr|P73649|P73649_SYNY3	WP_062433090.1	44.444	18	10	0	41	58	59	76	0.32	25.4
tr|P73649|P73649_SYNY3	WP_138072148.1	30.000	50	30	1	28	72	174	223	0.13	26.2
tr|P73649|P73649_SYNY3	WP_138073334.1	53.846	13	6	0	45	57	24	36	0.25	25.8
tr|P73649|P73649_SYNY3	WP_012307203.1	31.250	64	36	4	1	59	1	61	0.71	23.9
tr|P73649|P73649_SYNY3	WP_012307405.1	36.000	25	16	0	33	57	71	95	0.86	23.9
NAD(P)H dehydrogenase-like complex 1
slr1623	P74338	hypothetical protein		ndhM	NADH dehydrogenase	Photosynthesis & Respiration	TM		14.1	0
BLAST Output	PCC 11901 Accession	Percentage Identity	Alignment Length	Mismatches	Gap Open	Synechocystis sp. PCC 6803 Start	Synechocystis sp. PCC 6803 End	PCC 11901 Start	PCC 11901 End	E-value	Bit Score
sp|P74338|NDHM_SYNY3	WP_012306200.1	71.795	117	33	0	1	117	1	117	2.61e-62	182
slr2007	P73225	NADH dehydrogenase subunit 4	ndhD5	ndhD5, ndhD, mrpD	NADH dehydrogenase	Photosynthesis & Respiration	PM		52.1	13
BLAST Output	PCC 11901 Accession	Percentage Identity	Alignment Length	Mismatches	Gap Open	Synechocystis sp. PCC 6803 Start	Synechocystis sp. PCC 6803 End	PCC 11901 Start	PCC 11901 End	E-value	Bit Score
tr|P73225|P73225_SYNY3	WP_181445667.1	57.627	472	183	5	20	482	10	473	2.99e-174	495
tr|P73225|P73225_SYNY3	WP_138071353.1	53.712	458	210	1	27	482	16	473	8.33e-165	471
tr|P73225|P73225_SYNY3	WP_138071286.1	29.429	350	201	15	14	321	6	351	2.25e-22	96.7
tr|P73225|P73225_SYNY3	WP_138073469.1	29.412	340	202	12	100	405	102	437	6.63e-20	89.0
tr|P73225|P73225_SYNY3	WP_012307583.1	27.119	354	203	13	14	321	7	351	2.44e-17	80.9
tr|P73225|P73225_SYNY3	WP_012307609.1	22.685	432	279	12	9	388	2	430	3.62e-15	74.3
tr|P73225|P73225_SYNY3	WP_138072120.1	23.295	352	226	10	55	369	52	396	1.33e-14	72.4
tr|P73225|P73225_SYNY3	WP_062435973.1	27.726	321	180	11	28	302	12	326	2.71e-14	71.6
tr|P73225|P73225_SYNY3	WP_138072859.1	24.340	341	205	11	74	367	87	421	7.99e-12	63.9
tr|P73225|P73225_SYNY3	WP_012305810.1	25.893	224	148	5	89	298	107	326	1.91e-06	46.6
tr|P73225|P73225_SYNY3	WP_138073468.1	24.219	256	157	9	92	321	110	354	3.78e-04	39.3
sll0027	Q55464	NADH dehydrogenase subunit 4 (involved in constitutive, low affinity CO2 uptake)	ndhD4	ndhD4, ndhD, sll0027	NADH dehydrogenase	Photosynthesis & Respiration	TM		55.1	13
BLAST Output	PCC 11901 Accession	Percentage Identity	Alignment Length	Mismatches	Gap Open	Synechocystis sp. PCC 6803 Start	Synechocystis sp. PCC 6803 End	PCC 11901 Start	PCC 11901 End	E-value	Bit Score
tr|Q55464|Q55464_SYNY3	WP_138073469.1	65.139	502	166	1	1	502	1	493	0.0	593
tr|Q55464|Q55464_SYNY3	WP_138072120.1	53.131	495	228	1	1	495	1	491	0.0	527
tr|Q55464|Q55464_SYNY3	WP_138071286.1	38.343	519	279	6	2	483	8	522	6.12e-104	318
tr|Q55464|Q55464_SYNY3	WP_012307583.1	37.681	483	282	6	9	478	16	492	7.10e-99	305
tr|Q55464|Q55464_SYNY3	WP_012307609.1	35.125	521	319	7	2	507	9	525	1.54e-94	293
tr|Q55464|Q55464_SYNY3	WP_138072859.1	25.602	457	297	17	9	435	15	458	8.23e-23	98.6
tr|Q55464|Q55464_SYNY3	WP_138071353.1	27.401	354	219	11	77	426	65	384	1.09e-19	88.2
tr|Q55464|Q55464_SYNY3	WP_181445667.1	27.089	347	218	10	78	423	67	379	4.15e-19	86.3
tr|Q55464|Q55464_SYNY3	WP_062435973.1	25.714	350	240	9	112	447	114	457	2.26e-15	75.1
tr|Q55464|Q55464_SYNY3	WP_138073468.1	23.684	380	253	11	109	474	122	478	2.61e-15	75.1
tr|Q55464|Q55464_SYNY3	WP_012305810.1	23.575	386	271	10	109	482	122	495	9.68e-13	67.0
sll0223	P72714	NADH dehydrogenase subunit 2	ndhB	ndhB	NADH dehydrogenase	Photosynthesis & Respiration	TM		55.3	14
BLAST Output	PCC 11901 Accession	Percentage Identity	Alignment Length	Mismatches	Gap Open	Synechocystis sp. PCC 6803 Start	Synechocystis sp. PCC 6803 End	PCC 11901 Start	PCC 11901 End	E-value	Bit Score
sp|P72714|NU2C_SYNY3	WP_062435973.1	75.049	513	127	1	1	513	1	512	0.0	748
sp|P72714|NU2C_SYNY3	WP_138072859.1	25.065	387	265	12	62	434	74	449	3.63e-18	84.3
sp|P72714|NU2C_SYNY3	WP_138072120.1	29.352	293	170	12	130	405	122	394	1.83e-16	78.6
sp|P72714|NU2C_SYNY3	WP_012307583.1	25.378	331	231	8	78	405	85	402	4.79e-14	70.9
sp|P72714|NU2C_SYNY3	WP_138071286.1	26.667	285	186	9	130	405	132	402	1.13e-13	69.7
sp|P72714|NU2C_SYNY3	WP_138073469.1	26.346	353	236	10	116	456	114	454	6.46e-10	57.8
sp|P72714|NU2C_SYNY3	WP_012307609.1	21.498	307	211	9	228	517	225	518	7.09e-10	57.8
sp|P72714|NU2C_SYNY3	WP_012305810.1	22.741	343	243	9	111	447	120	446	3.22e-08	52.4
sp|P72714|NU2C_SYNY3	WP_138071353.1	26.441	295	165	10	116	401	101	352	7.54e-08	51.2
sp|P72714|NU2C_SYNY3	WP_138073468.1	23.936	376	233	14	105	460	114	456	1.84e-07	50.1
sp|P72714|NU2C_SYNY3	WP_181445667.1	27.751	209	124	7	116	321	102	286	4.53e-07	48.5
sp|P72714|NU2C_SYNY3	WP_138073467.1	37.838	37	23	0	28	64	331	367	0.26	30.4
sp|P72714|NU2C_SYNY3	WP_138073361.1	29.114	79	49	3	228	305	73	145	0.63	29.3
sll0519	P26522	NADH dehydrogenase subunit 1	ndhA	ndhA	NADH dehydrogenase	Photosynthesis & Respiration	TM		40.5	8
BLAST Output	PCC 11901 Accession	Percentage Identity	Alignment Length	Mismatches	Gap Open	Synechocystis sp. PCC 6803 Start	Synechocystis sp. PCC 6803 End	PCC 11901 Start	PCC 11901 End	E-value	Bit Score
sp|P26522|NU1C_SYNY3	WP_030007840.1	84.677	372	57	0	1	372	1	372	0.0	611
sp|P26522|NU1C_SYNY3	WP_012307032.1	27.397	73	52	1	72	144	80	151	0.78	28.1
sll0520	P26525	NADH dehydrogenase subunit NdhI	ndhI	ndhI	NADH dehydrogenase	Photosynthesis & Respiration	TM		22.1	0
BLAST Output	PCC 11901 Accession	Percentage Identity	Alignment Length	Mismatches	Gap Open	Synechocystis sp. PCC 6803 Start	Synechocystis sp. PCC 6803 End	PCC 11901 Start	PCC 11901 End	E-value	Bit Score
sp|P26525|NDHI_SYNY3	WP_062433090.1	87.435	191	23	1	1	191	1	190	2.42e-131	363
sp|P26525|NDHI_SYNY3	WP_138072148.1	32.979	94	53	5	29	118	118	205	3.22e-05	39.7
sp|P26525|NDHI_SYNY3	WP_012307203.1	35.484	62	35	2	62	122	8	65	8.33e-05	36.6
sp|P26525|NDHI_SYNY3	WP_012306860.1	34.545	55	32	1	71	125	16	66	0.003	32.3
sp|P26525|NDHI_SYNY3	WP_012306860.1	31.429	35	22	1	50	82	29	63	0.055	28.5
sp|P26525|NDHI_SYNY3	WP_138073249.1	26.531	98	48	3	65	138	690	787	0.036	31.2
sp|P26525|NDHI_SYNY3	WP_012307405.1	30.769	39	27	0	96	134	75	113	0.15	28.1
sp|P26525|NDHI_SYNY3	WP_012307405.1	40.909	22	13	0	57	78	107	128	0.37	26.9
sp|P26525|NDHI_SYNY3	WP_138073334.1	25.000	68	40	2	62	118	22	89	0.75	26.9
sll1262	P74069	hypothetical protein		ndhN, sll1262	NADH dehydrogenase	Photosynthesis & Respiration	TM		17.6	0
BLAST Output	PCC 11901 Accession	Percentage Identity	Alignment Length	Mismatches	Gap Open	Synechocystis sp. PCC 6803 Start	Synechocystis sp. PCC 6803 End	PCC 11901 Start	PCC 11901 End	E-value	Bit Score
sp|P74069|NDHN_SYNY3	WP_012306766.1	60.897	156	60	1	4	158	1	156	1.14e-66	197
sll1734	P73393	protein involved in low CO2-inducible, high affinity CO2 uptake	cupA	cupA, chpY, sll1734	NADH dehydrogenase	Photosynthesis & Respiration	TM		50	0
BLAST Output	PCC 11901 Accession	Percentage Identity	Alignment Length	Mismatches	Gap Open	Synechocystis sp. PCC 6803 Start	Synechocystis sp. PCC 6803 End	PCC 11901 Start	PCC 11901 End	E-value	Bit Score
tr|P73393|P73393_SYNY3	WP_012305812.1	87.264	424	54	0	8	431	4	427	0.0	782
tr|P73393|P73393_SYNY3	WP_041443893.1	45.390	423	180	4	8	427	4	378	4.18e-116	341
slr0261	P27724	NADH dehydrogenase subunit 7	ndhH	ndhH	NADH dehydrogenase	Photosynthesis & Respiration	TM		44.3	0
BLAST Output	PCC 11901 Accession	Percentage Identity	Alignment Length	Mismatches	Gap Open	Synechocystis sp. PCC 6803 Start	Synechocystis sp. PCC 6803 End	PCC 11901 Start	PCC 11901 End	E-value	Bit Score
sp|P27724|NDHH_SYNY3	WP_012308136.1	92.893	394	28	0	1	394	1	394	0.0	771
sp|P27724|NDHH_SYNY3	WP_138073067.1	28.889	90	58	2	246	335	328	411	0.010	34.3
slr0331	P32421	NADH dehydrogenase subunit 4 (involved in photosystem-1 cyclic electron flow)	ndhD1	ndhD1, ndhD	NADH dehydrogenase	Photosynthesis & Respiration	TM		57.5	14
BLAST Output	PCC 11901 Accession	Percentage Identity	Alignment Length	Mismatches	Gap Open	Synechocystis sp. PCC 6803 Start	Synechocystis sp. PCC 6803 End	PCC 11901 Start	PCC 11901 End	E-value	Bit Score
sp|P32421|NU4C1_SYNY3	WP_012307609.1	81.382	521	97	0	3	523	5	525	0.0	852
sp|P32421|NU4C1_SYNY3	WP_012307583.1	63.817	503	182	0	5	507	7	509	0.0	643
sp|P32421|NU4C1_SYNY3	WP_138071286.1	58.059	546	198	6	4	520	5	548	0.0	627
sp|P32421|NU4C1_SYNY3	WP_138072120.1	34.719	481	290	8	44	516	31	495	3.14e-91	285
sp|P32421|NU4C1_SYNY3	WP_138073469.1	37.768	466	274	6	7	465	2	458	1.61e-86	272
sp|P32421|NU4C1_SYNY3	WP_181445667.1	22.622	389	257	13	11	398	10	355	7.08e-18	82.8
sp|P32421|NU4C1_SYNY3	WP_138071353.1	23.794	311	201	9	83	390	66	343	3.89e-16	77.4
sp|P32421|NU4C1_SYNY3	WP_138073468.1	26.336	262	180	8	114	370	122	375	9.32e-15	73.6
sp|P32421|NU4C1_SYNY3	WP_062435973.1	27.374	179	128	2	223	400	227	404	1.14e-12	66.6
sp|P32421|NU4C1_SYNY3	WP_012305810.1	22.927	410	287	13	1	393	1	398	3.21e-11	62.0
sp|P32421|NU4C1_SYNY3	WP_138072859.1	23.105	277	192	7	133	393	143	414	1.25e-07	50.8
slr0844	Q55429	NADH dehydrogenase subunit 5	ndhF1	ndhF1, ndhF	NADH dehydrogenase	Photosynthesis & Respiration	TM		74.4	16
BLAST Output	PCC 11901 Accession	Percentage Identity	Alignment Length	Mismatches	Gap Open	Synechocystis sp. PCC 6803 Start	Synechocystis sp. PCC 6803 End	PCC 11901 Start	PCC 11901 End	E-value	Bit Score
sp|Q55429|NU5C_SYNY3	WP_138072859.1	77.386	681	135	3	1	680	1	663	0.0	1058
sp|Q55429|NU5C_SYNY3	WP_138073468.1	27.434	678	420	11	2	675	3	612	2.40e-67	229
sp|Q55429|NU5C_SYNY3	WP_012305810.1	24.853	680	426	11	6	679	7	607	1.82e-60	210
sp|Q55429|NU5C_SYNY3	WP_138072120.1	26.179	424	268	14	37	445	25	418	1.63e-25	107
sp|Q55429|NU5C_SYNY3	WP_181445667.1	30.612	245	137	9	124	363	97	313	2.84e-17	81.6
sp|Q55429|NU5C_SYNY3	WP_138073469.1	25.356	351	230	11	117	456	104	433	3.73e-17	81.3
sp|Q55429|NU5C_SYNY3	WP_062435973.1	26.990	289	177	10	143	417	132	400	7.21e-17	80.5
sp|Q55429|NU5C_SYNY3	WP_138071286.1	24.138	377	230	15	60	414	53	395	1.29e-16	79.7
sp|Q55429|NU5C_SYNY3	WP_138071353.1	25.595	336	205	13	88	421	64	356	2.77e-16	78.6
sp|Q55429|NU5C_SYNY3	WP_012307583.1	27.157	313	176	12	133	424	125	406	4.04e-13	68.6
sp|Q55429|NU5C_SYNY3	WP_012307609.1	22.492	329	206	8	124	439	116	408	2.75e-10	59.7
sp|Q55429|NU5C_SYNY3	WP_138071329.1	27.397	73	52	1	98	169	130	202	0.039	33.5
sp|Q55429|NU5C_SYNY3	WP_030006721.1	40.000	50	29	1	419	468	421	469	0.15	31.6
sp|Q55429|NU5C_SYNY3	WP_138073654.1	26.364	110	79	2	244	351	170	279	0.17	31.2
slr1280	P19050	NADH dehydrogenase subunit NdhK	ndhK	ndhK, psbG1, psbG	NADH dehydrogenase	Photosynthesis & Respiration	TM		27.3	0
BLAST Output	PCC 11901 Accession	Percentage Identity	Alignment Length	Mismatches	Gap Open	Synechocystis sp. PCC 6803 Start	Synechocystis sp. PCC 6803 End	PCC 11901 Start	PCC 11901 End	E-value	Bit Score
sp|P19050|NDHK1_SYNY3	WP_012308341.1	83.682	239	38	1	7	244	4	242	1.89e-153	423
sp|P19050|NDHK1_SYNY3	WP_138072150.1	29.032	62	39	2	108	169	112	168	0.091	29.6
slr1281	P19125	NADH dehydrogenase subunit I	ndhJ	ndhJ	NADH dehydrogenase	Photosynthesis & Respiration	TM		20.6	0
BLAST Output	PCC 11901 Accession	Percentage Identity	Alignment Length	Mismatches	Gap Open	Synechocystis sp. PCC 6803 Start	Synechocystis sp. PCC 6803 End	PCC 11901 Start	PCC 11901 End	E-value	Bit Score
sp|P19125|NDHJ_SYNY3	WP_012308342.1	74.302	179	41	1	1	179	1	174	9.47e-101	284
slr1302	P72840	protein involved in constitutive low affinity CO2 uptake	cupB	cupB, chpX, slr1302	NADH dehydrogenase	Photosynthesis & Respiration	TM		43.4	0
BLAST Output	PCC 11901 Accession	Percentage Identity	Alignment Length	Mismatches	Gap Open	Synechocystis sp. PCC 6803 Start	Synechocystis sp. PCC 6803 End	PCC 11901 Start	PCC 11901 End	E-value	Bit Score
tr|P72840|P72840_SYNY3	WP_041443893.1	64.800	375	132	0	28	402	1	375	0.0	523
tr|P72840|P72840_SYNY3	WP_012305812.1	42.344	418	196	4	28	400	1	418	5.80e-113	334
tr|P72840|P72840_SYNY3	WP_065717118.1	25.926	81	60	0	302	382	27	107	0.65	27.7
ssl1690	P74771	hypothetical protein		ndhO	NADH dehydrogenase	Photosynthesis & Respiration	TM		8.3	0
BLAST Output	PCC 11901 Accession	Percentage Identity	Alignment Length	Mismatches	Gap Open	Synechocystis sp. PCC 6803 Start	Synechocystis sp. PCC 6803 End	PCC 11901 Start	PCC 11901 End	E-value	Bit Score
sp|P74771|NDHO_SYNY3	WP_012307699.1	73.239	71	19	0	1	71	1	71	4.41e-37	115
sp|P74771|NDHO_SYNY3	WP_168191163.1	35.484	31	20	0	24	54	98	128	0.48	24.6
sll0272	P74394	hypothetical protein		ndhV	NADH dehydrogenase	Photosynthesis & Respiration	Unknown		15.8	0
BLAST Output	PCC 11901 Accession	Percentage Identity	Alignment Length	Mismatches	Gap Open	Synechocystis sp. PCC 6803 Start	Synechocystis sp. PCC 6803 End	PCC 11901 Start	PCC 11901 End	E-value	Bit Score
tr|P74394|P74394_SYNY3	WP_030007824.1	54.918	122	52	1	33	154	24	142	5.31e-42	134
tr|P74394|P74394_SYNY3	WP_138073226.1	27.273	55	38	1	14	66	29	83	0.50	26.6
tr|P74394|P74394_SYNY3	WP_138072739.1	27.273	44	32	0	84	127	46	89	0.79	26.2
sll1735	P73392	hypothetical protein - co2 uptake		cupS, sll1735	NADH dehydrogenase	Photosynthesis & Respiration	Unknown		14.1	0
BLAST Output	PCC 11901 Accession	Percentage Identity	Alignment Length	Mismatches	Gap Open	Synechocystis sp. PCC 6803 Start	Synechocystis sp. PCC 6803 End	PCC 11901 Start	PCC 11901 End	E-value	Bit Score
sp|P73392|Y1735_SYNY3	WP_138072122.1	69.925	133	40	0	1	133	1	133	2.60e-62	184
sp|P73392|Y1735_SYNY3	WP_138073265.1	51.538	130	60	2	4	131	55	183	3.19e-38	125
ssl0352	P74795	hypothetical protein		ssl0352, ndhS	NADH dehydrogenase	Photosynthesis & Respiration	Unknown		6.6	0
BLAST Output	PCC 11901 Accession	Percentage Identity	Alignment Length	Mismatches	Gap Open	Synechocystis sp. PCC 6803 Start	Synechocystis sp. PCC 6803 End	PCC 11901 Start	PCC 11901 End	E-value	Bit Score
tr|P74795|P74795_SYNY3	WP_012305932.1	76.786	56	13	0	1	56	1	56	3.55e-29	94.4
sll0026	Q55465	NADH dehydrogenase subunit 5 (involved in constitutive, low affinity CO2 uptake)	ndhF4	ndhF4, ndhF, sll0026	NADH dehydrogenase	Photosynthesis & Respiration
BLAST Output	PCC 11901 Accession	Percentage Identity	Alignment Length	Mismatches	Gap Open	Synechocystis sp. PCC 6803 Start	Synechocystis sp. PCC 6803 End	PCC 11901 Start	PCC 11901 End	E-value	Bit Score
tr|Q55465|Q55465_SYNY3	WP_138073468.1	64.873	632	220	2	1	630	1	632	0.0	824
tr|Q55465|Q55465_SYNY3	WP_012305810.1	44.046	613	330	3	1	610	1	603	3.94e-168	490
tr|Q55465|Q55465_SYNY3	WP_138072859.1	29.412	595	365	15	72	615	74	664	4.09e-65	223
tr|Q55465|Q55465_SYNY3	WP_138072120.1	24.790	476	309	20	36	484	20	473	1.98e-16	79.0
tr|Q55465|Q55465_SYNY3	WP_062435973.1	27.877	391	241	15	112	472	102	481	7.05e-15	73.9
tr|Q55465|Q55465_SYNY3	WP_138071286.1	27.500	280	189	7	122	392	115	389	1.81e-13	69.7
tr|Q55465|Q55465_SYNY3	WP_012307583.1	27.733	375	231	16	122	472	116	474	4.74e-13	68.2
tr|Q55465|Q55465_SYNY3	WP_012307609.1	26.271	236	157	8	150	375	144	372	1.31e-11	63.5
tr|Q55465|Q55465_SYNY3	WP_138073469.1	23.342	377	267	13	115	477	101	469	5.03e-10	58.5
tr|Q55465|Q55465_SYNY3	WP_138071353.1	25.610	246	163	6	112	356	86	312	1.52e-04	40.8
sll0521	P26523	NADH dehydrogenase subunit 6	ndhG	ndhG	NADH dehydrogenase	Photosynthesis & Respiration
BLAST Output	PCC 11901 Accession	Percentage Identity	Alignment Length	Mismatches	Gap Open	Synechocystis sp. PCC 6803 Start	Synechocystis sp. PCC 6803 End	PCC 11901 Start	PCC 11901 End	E-value	Bit Score
sp|P26523|NU6C_SYNY3	WP_138072938.1	71.357	199	56	1	1	198	1	199	1.04e-100	286
sp|P26523|NU6C_SYNY3	WP_138073591.1	52.632	19	9	0	118	136	314	332	0.80	26.9
sll0522	P26524	NADH dehydrogenase subunit 4L	ndhE	ndhE, sll0522	NADH dehydrogenase	Photosynthesis & Respiration
BLAST Output	PCC 11901 Accession	Percentage Identity	Alignment Length	Mismatches	Gap Open	Synechocystis sp. PCC 6803 Start	Synechocystis sp. PCC 6803 End	PCC 11901 Start	PCC 11901 End	E-value	Bit Score
sp|P26524|NU4LC_SYNY3	WP_012306551.1	81.553	103	19	0	1	103	1	103	1.66e-50	151
sp|P26524|NU4LC_SYNY3	WP_138073732.1	32.353	34	23	0	33	66	19	52	0.043	28.9
sp|P26524|NU4LC_SYNY3	WP_138072226.1	35.714	28	18	0	71	98	159	186	0.84	25.0
sll1732	P73395	NADH dehydrogenase subunit 5 (involved in low CO2-inducible, high affinity CO2 uptake)	ndhF3	ndhF3, ndhF, sll1732	NADH dehydrogenase	Photosynthesis & Respiration
BLAST Output	PCC 11901 Accession	Percentage Identity	Alignment Length	Mismatches	Gap Open	Synechocystis sp. PCC 6803 Start	Synechocystis sp. PCC 6803 End	PCC 11901 Start	PCC 11901 End	E-value	Bit Score
tr|P73395|P73395_SYNY3	WP_012305810.1	65.461	608	210	0	6	613	6	613	0.0	792
tr|P73395|P73395_SYNY3	WP_138073468.1	48.525	610	304	3	1	601	1	609	0.0	573
tr|P73395|P73395_SYNY3	WP_138072859.1	27.769	659	413	12	2	601	1	655	3.05e-64	220
tr|P73395|P73395_SYNY3	WP_138072120.1	27.809	356	235	13	36	380	20	364	1.36e-15	76.3
tr|P73395|P73395_SYNY3	WP_062435973.1	25.566	309	213	7	109	404	99	403	6.91e-13	67.8
tr|P73395|P73395_SYNY3	WP_138071286.1	24.126	286	203	6	122	398	115	395	9.50e-10	57.8
tr|P73395|P73395_SYNY3	WP_012307609.1	24.221	289	206	8	122	402	116	399	3.92e-08	52.4
tr|P73395|P73395_SYNY3	WP_138073469.1	24.110	365	254	12	115	464	101	457	1.94e-06	47.0
tr|P73395|P73395_SYNY3	WP_012307583.1	22.848	302	216	8	139	430	133	427	4.10e-06	46.2
tr|P73395|P73395_SYNY3	WP_138071353.1	25.481	208	140	5	120	326	94	287	6.47e-04	38.9
tr|P73395|P73395_SYNY3	WP_181445667.1	25.271	277	180	9	122	390	97	354	0.001	38.5
sll1733	P73394	NADH dehydrogenase subunit 4 (involved in low CO2-inducible, high affinity CO2 uptake)	ndhD3	ndhD3, ndhD, sll1733	NADH dehydrogenase	Photosynthesis & Respiration
BLAST Output	PCC 11901 Accession	Percentage Identity	Alignment Length	Mismatches	Gap Open	Synechocystis sp. PCC 6803 Start	Synechocystis sp. PCC 6803 End	PCC 11901 Start	PCC 11901 End	E-value	Bit Score
tr|P73394|P73394_SYNY3	WP_138072120.1	67.695	486	153	1	1	486	1	482	0.0	656
tr|P73394|P73394_SYNY3	WP_138073469.1	51.446	484	235	0	1	484	1	484	3.91e-154	445
tr|P73394|P73394_SYNY3	WP_012307583.1	38.497	439	248	5	9	434	16	445	4.96e-94	292
tr|P73394|P73394_SYNY3	WP_138071286.1	39.401	401	237	4	2	400	8	404	2.77e-93	291
tr|P73394|P73394_SYNY3	WP_012307609.1	34.638	511	319	6	2	501	9	515	1.06e-92	288
tr|P73394|P73394_SYNY3	WP_138072859.1	26.386	451	285	16	4	422	10	445	8.04e-24	101
tr|P73394|P73394_SYNY3	WP_062435973.1	26.108	406	266	13	112	492	114	510	1.15e-17	82.0
tr|P73394|P73394_SYNY3	WP_181445667.1	22.563	359	244	10	74	430	63	389	7.05e-14	70.1
tr|P73394|P73394_SYNY3	WP_012305810.1	24.138	377	263	8	109	475	122	485	1.59e-13	69.3
tr|P73394|P73394_SYNY3	WP_138073468.1	26.023	342	217	14	60	385	68	389	6.23e-11	61.2
tr|P73394|P73394_SYNY3	WP_138071353.1	24.242	330	197	12	86	403	73	361	8.67e-11	60.5
sll8031	P17062	NADH dehydrogenase subunit NdhK	ndhK2	ndhK2, ndhK, psbG2, psbG	NADH dehydrogenase	Photosynthesis & Respiration
BLAST Output	PCC 11901 Accession	Percentage Identity	Alignment Length	Mismatches	Gap Open	Synechocystis sp. PCC 6803 Start	Synechocystis sp. PCC 6803 End	PCC 11901 Start	PCC 11901 End	E-value	Bit Score
sp|P17062|NDHK2_SYNY3	WP_012308341.1	69.231	195	59	1	10	203	16	210	7.23e-104	296
sp|P17062|NDHK2_SYNY3	WP_138072150.1	19.497	159	82	6	40	156	10	164	0.026	31.2
slr1279	P19045	NADH dehydrogenase subunit 3	ndhC	ndhC	NADH dehydrogenase	Photosynthesis & Respiration
BLAST Output	PCC 11901 Accession	Percentage Identity	Alignment Length	Mismatches	Gap Open	Synechocystis sp. PCC 6803 Start	Synechocystis sp. PCC 6803 End	PCC 11901 Start	PCC 11901 End	E-value	Bit Score
sp|P19045|NU3C_SYNY3	WP_012308340.1	92.500	120	9	0	1	120	1	120	1.92e-79	226
slr1291	P72823	NADH dehydrogenase subunit 4	ndhD2	ndhD2, ndhD	NADH dehydrogenase	Photosynthesis & Respiration
BLAST Output	PCC 11901 Accession	Percentage Identity	Alignment Length	Mismatches	Gap Open	Synechocystis sp. PCC 6803 Start	Synechocystis sp. PCC 6803 End	PCC 11901 Start	PCC 11901 End	E-value	Bit Score
sp|P72823|NU4C2_SYNY3	WP_138071286.1	67.518	548	175	2	1	547	1	546	0.0	759
sp|P72823|NU4C2_SYNY3	WP_012307583.1	63.977	533	167	2	4	536	5	512	0.0	674
sp|P72823|NU4C2_SYNY3	WP_012307609.1	58.974	546	197	3	4	547	5	525	0.0	638
sp|P72823|NU4C2_SYNY3	WP_138073469.1	41.060	453	255	4	8	456	2	446	1.30e-97	302
sp|P72823|NU4C2_SYNY3	WP_138072120.1	37.405	393	236	3	55	444	45	430	2.70e-90	283
sp|P72823|NU4C2_SYNY3	WP_181445667.1	26.442	416	253	16	12	425	10	374	1.13e-19	88.6
sp|P72823|NU4C2_SYNY3	WP_138071353.1	26.235	324	205	9	105	428	87	376	2.56e-18	84.3
sp|P72823|NU4C2_SYNY3	WP_062435973.1	28.758	306	183	11	117	401	113	404	6.09e-18	83.2
sp|P72823|NU4C2_SYNY3	WP_138073468.1	26.855	283	190	7	107	382	114	386	5.30e-17	80.9
sp|P72823|NU4C2_SYNY3	WP_138072859.1	25.352	355	217	14	74	397	80	417	2.44e-15	75.5
sp|P72823|NU4C2_SYNY3	WP_012305810.1	24.069	349	233	10	65	396	67	400	1.15e-12	67.0
sp|P72823|NU4C2_SYNY3	WP_138073600.1	27.368	95	60	2	94	186	15	102	0.41	30.0
slr2009	P73227	NADH dehydrogenase subunit 4	ndhD6	ndhD6, ndhF, ndhD, mrpD	NADH dehydrogenase	Photosynthesis & Respiration
BLAST Output	PCC 11901 Accession	Percentage Identity	Alignment Length	Mismatches	Gap Open	Synechocystis sp. PCC 6803 Start	Synechocystis sp. PCC 6803 End	PCC 11901 Start	PCC 11901 End	E-value	Bit Score
tr|P73227|P73227_SYNY3	WP_181445667.1	51.174	426	201	2	65	490	55	473	2.02e-137	402
tr|P73227|P73227_SYNY3	WP_138071353.1	45.591	465	243	4	28	490	17	473	1.05e-128	379
tr|P73227|P73227_SYNY3	WP_138072859.1	28.571	308	175	12	97	363	114	417	1.73e-16	78.6
tr|P73227|P73227_SYNY3	WP_138071286.1	25.364	343	210	9	59	360	58	395	1.01e-15	76.3
tr|P73227|P73227_SYNY3	WP_138072120.1	26.065	399	238	14	19	368	5	395	3.09e-15	74.3
tr|P73227|P73227_SYNY3	WP_138073469.1	25.656	343	202	12	99	400	97	427	2.20e-13	68.6
tr|P73227|P73227_SYNY3	WP_012307609.1	23.892	406	261	12	77	439	85	485	2.95e-12	65.1
tr|P73227|P73227_SYNY3	WP_012307583.1	26.578	301	177	8	63	326	63	356	4.40e-12	64.7
tr|P73227|P73227_SYNY3	WP_062435973.1	30.303	231	133	8	112	320	116	340	4.04e-10	58.2
tr|P73227|P73227_SYNY3	WP_012305810.1	25.088	283	177	10	107	360	122	398	1.97e-05	43.5
tr|P73227|P73227_SYNY3	WP_138073468.1	26.347	334	200	16	30	323	29	356	7.13e-05	41.6
ssr1386	P27372	NADH dehydrogenase subunit NdhL	ndhL	ndhL, ictA, ssr1386	NADH dehydrogenase	Photosynthesis & Respiration
BLAST Output	PCC 11901 Accession	Percentage Identity	Alignment Length	Mismatches	Gap Open	Synechocystis sp. PCC 6803 Start	Synechocystis sp. PCC 6803 End	PCC 11901 Start	PCC 11901 End	E-value	Bit Score
sp|P27372|NDHL_SYNY3	WP_181445690.1	69.118	68	21	0	11	78	4	71	1.65e-28	94.4
sp|P27372|NDHL_SYNY3	WP_012306846.1	32.759	58	36	1	19	73	133	190	0.26	25.8
NAD(P)H dehydrogenase II proteins
sll1484	P74614	type 2 NADH dehydrogenase	ndbC	ndh, ndbC, ndhC	NADH dehydrogenase type 2	Photosynthesis & Respiration	PM		52.8	1
BLAST Output	PCC 11901 Accession	Percentage Identity	Alignment Length	Mismatches	Gap Open	Synechocystis sp. PCC 6803 Start	Synechocystis sp. PCC 6803 End	PCC 11901 Start	PCC 11901 End	E-value	Bit Score
tr|P74614|P74614_SYNY3	WP_138073605.1	34.559	408	231	14	49	452	7	382	1.35e-48	169
tr|P74614|P74614_SYNY3	WP_138073704.1	26.893	383	255	9	43	413	13	382	8.58e-26	106
tr|P74614|P74614_SYNY3	WP_138071796.1	33.742	163	95	4	236	398	181	330	9.16e-14	70.5
tr|P74614|P74614_SYNY3	WP_138073886.1	30.909	110	68	5	46	150	2	108	0.006	35.4
tr|P74614|P74614_SYNY3	WP_138073101.1	23.288	73	44	1	229	301	2517	2577	0.81	28.9
tr|P74614|P74614_SYNY3	WP_138073640.1	43.750	32	15	1	202	233	368	396	0.82	28.9
tr|P74614|P74614_SYNY3	WP_030006434.1	29.268	82	47	3	405	480	315	391	0.90	28.5
slr0851	P73739	type 2 NADH dehydrogenase	ndbA	ndh, ndbA	NADH dehydrogenase type 2	Photosynthesis & Respiration
BLAST Output	PCC 11901 Accession	Percentage Identity	Alignment Length	Mismatches	Gap Open	Synechocystis sp. PCC 6803 Start	Synechocystis sp. PCC 6803 End	PCC 11901 Start	PCC 11901 End	E-value	Bit Score
tr|P73739|P73739_SYNY3	WP_138073704.1	66.746	421	135	3	9	427	15	432	0.0	572
tr|P73739|P73739_SYNY3	WP_138073605.1	29.540	413	246	13	9	412	3	379	2.99e-42	150
tr|P73739|P73739_SYNY3	WP_138071796.1	23.739	337	217	9	12	339	4	309	1.69e-05	43.5
tr|P73739|P73739_SYNY3	WP_138073886.1	22.917	336	207	13	11	326	3	306	5.22e-05	41.6
tr|P73739|P73739_SYNY3	WP_138073175.1	22.581	155	97	6	164	314	171	306	0.002	36.6
tr|P73739|P73739_SYNY3	WP_138073081.1	21.893	169	103	6	141	302	163	309	0.17	30.4
tr|P73739|P73739_SYNY3	WP_138073148.1	35.593	59	32	3	247	304	42	95	0.29	29.6
tr|P73739|P73739_SYNY3	WP_138071906.1	43.333	30	17	0	173	202	172	201	0.40	29.3
tr|P73739|P73739_SYNY3	WP_138073436.1	28.947	76	36	3	10	71	5	76	0.88	28.5
slr1743	P73735	type 2 NADH dehydrogenase NdbB	ndbB	ndbB, ndh, ndhB	NADH dehydrogenase type 2	Photosynthesis & Respiration	PM	0.886768423	44.5	0.0
BLAST Output	PCC 11901 Accession	Percentage Identity	Alignment Length	Mismatches	Gap Open	Synechocystis sp. PCC 6803 Start	Synechocystis sp. PCC 6803 End	PCC 11901 Start	PCC 11901 End	E-value	Bit Score
sp|P73735|NDBB_SYNY3	WP_138073605.1	54.798	396	170	2	4	399	2	388	1.97e-155	441
sp|P73735|NDBB_SYNY3	WP_138073704.1	26.942	412	266	7	5	390	15	417	1.66e-31	121
sp|P73735|NDBB_SYNY3	WP_138071796.1	26.201	229	151	6	80	299	73	292	7.96e-09	53.9
sp|P73735|NDBB_SYNY3	WP_138073886.1	29.508	122	80	2	7	128	3	118	1.30e-04	40.4
sp|P73735|NDBB_SYNY3	WP_138073221.1	31.522	92	52	5	172	253	173	263	0.002	36.6
sp|P73735|NDBB_SYNY3	WP_138073081.1	25.301	249	148	15	93	320	126	357	0.35	29.3
sp|P73735|NDBB_SYNY3	WP_138071303.1	24.242	66	34	3	7	62	2	61	0.70	28.5
SDH dehydogenase proteins
slr1233	P73479	succinate dehydrogenase flavoprotein subunit	sdhA	frdA, sdhA	Succinate dehydrogenase	Energy Metabolism	Soluble proteins	0.92599936	63.7	0.0
BLAST Output	PCC 11901 Accession	Percentage Identity	Alignment Length	Mismatches	Gap Open	Synechocystis sp. PCC 6803 Start	Synechocystis sp. PCC 6803 End	PCC 11901 Start	PCC 11901 End	E-value	Bit Score
tr|P73479|P73479_SYNY3	WP_138071585.1	77.739	575	128	0	1	575	1	575	0.0	952
tr|P73479|P73479_SYNY3	WP_138072242.1	35.957	559	291	21	5	537	12	529	2.53e-82	265
tr|P73479|P73479_SYNY3	WP_138071218.1	40.909	44	24	2	157	199	259	301	0.83	28.9
tr|P73479|P73479_SYNY3	WP_138072699.1	28.000	75	44	3	189	256	149	220	0.83	28.5
tr|P73479|P73479_SYNY3	WP_138072945.1	52.174	23	11	0	3	25	11	33	0.98	28.5
sll1625	P73723	succinate dehydrogenase iron- sulphur protein subunit	sdhB1	sdhB	Succinate dehydrogenase	Energy Metabolism	Soluble proteins	0.917513521	36.8	0.0
BLAST Output	PCC 11901 Accession	Percentage Identity	Alignment Length	Mismatches	Gap Open	Synechocystis sp. PCC 6803 Start	Synechocystis sp. PCC 6803 End	PCC 11901 Start	PCC 11901 End	E-value	Bit Score
tr|P73723|P73723_SYNY3	WP_138072968.1	57.273	330	133	4	1	327	1	325	1.83e-138	392
tr|P73723|P73723_SYNY3	WP_138073249.1	26.761	71	47	2	154	222	690	757	0.54	28.5
tr|P73723|P73723_SYNY3	WP_138073312.1	26.667	60	38	1	207	266	274	327	0.56	28.5
tr|P73723|P73723_SYNY3	WP_138073389.1	28.814	59	40	1	18	74	523	581	0.70	28.1
sll0823	Q55431	probable succinate dehydrogenase iron-sulfur protein	sdhB2	sdhB, sll0823	Succinate dehydrogenase	Energy Metabolism	Unknown	0.646269621	27.3	0.0
BLAST Output	PCC 11901 Accession	Percentage Identity	Alignment Length	Mismatches	Gap Open	Synechocystis sp. PCC 6803 Start	Synechocystis sp. PCC 6803 End	PCC 11901 Start	PCC 11901 End	E-value	Bit Score
tr|Q55431|Q55431_SYNY3	WP_138072968.1	50.661	227	110	1	20	244	21	247	2.16e-77	233
tr|Q55431|Q55431_SYNY3	WP_138073334.1	27.381	84	51	3	142	225	17	90	0.034	31.6
tr|Q55431|Q55431_SYNY3	WP_138072148.1	28.000	75	41	2	150	224	144	205	0.40	28.1
tr|Q55431|Q55431_SYNY3	WP_030007006.1	26.667	60	30	1	57	102	22	81	0.76	26.6
slr0201	Q55771	heterodisulfide reductase subunit B	sdhC	sdhC	Other	Other Categories	Soluble proteins	0.909507652	32.6	0.0
BLAST Output	PCC 11901 Accession	Percentage Identity	Alignment Length	Mismatches	Gap Open	Synechocystis sp. PCC 6803 Start	Synechocystis sp. PCC 6803 End	PCC 11901 Start	PCC 11901 End	E-value	Bit Score
tr|Q55771|Q55771_SYNY3	WP_065716105.1	70.946	296	86	0	5	300	2	297	4.32e-161	447
Terminal oxidases
slr1379	P73159	quinol oxidase subunit I	cydA	cydA, cyd-1	Quinol oxidase	Photosynthesis & Respiration
BLAST Output	PCC 11901 Accession	Percentage Identity	Alignment Length	Mismatches	Gap Open	Synechocystis sp. PCC 6803 Start	Synechocystis sp. PCC 6803 End	PCC 11901 Start	PCC 11901 End	E-value	Bit Score
No hits
slr1380	P73160	quinol oxidase subunit II	cydB	cydB	Quinol oxidase	Photosynthesis & Respiration
BLAST Output	PCC 11901 Accession	Percentage Identity	Alignment Length	Mismatches	Gap Open	Synechocystis sp. PCC 6803 Start	Synechocystis sp. PCC 6803 End	PCC 11901 Start	PCC 11901 End	E-value	Bit Score
tr|P73160|P73160_SYNY3	WP_012306367.1	38.000	50	23	2	132	173	26	75	0.23	27.7
sll1899	Q79EF2	cytochrome c oxidase folding protein	ctaB	ctaB, coxD	Soluble electron carriers	Photosynthesis & Respiration
BLAST Output	PCC 11901 Accession	Percentage Identity	Alignment Length	Mismatches	Gap Open	Synechocystis sp. PCC 6803 Start	Synechocystis sp. PCC 6803 End	PCC 11901 Start	PCC 11901 End	E-value	Bit Score
sp|Q79EF2|COXX_SYNY3	WP_030006259.1	73.226	310	83	0	5	314	4	313	4.66e-161	448
sp|Q79EF2|COXX_SYNY3	WP_012307014.1	25.253	198	137	3	26	217	18	210	1.71e-09	54.3
sp|Q79EF2|COXX_SYNY3	WP_041443765.1	36.047	86	49	4	16	97	37	120	0.003	35.0
slr1137	Q06473	cytochrome c oxidase subunit I	ctaDI	coxA, ctaI, ctaDI, ctaD, ctaD1, catD, coxI	Terminal oxidase 1	Photosynthesis & Respiration	TM		61.3	12
BLAST Output	PCC 11901 Accession	Percentage Identity	Alignment Length	Mismatches	Gap Open	Synechocystis sp. PCC 6803 Start	Synechocystis sp. PCC 6803 End	PCC 11901 Start	PCC 11901 End	E-value	Bit Score
sp|Q06473|COX1_SYNY3	WP_012306785.1	80.000	535	106	1	15	549	12	545	0.0	905
sp|Q06473|COX1_SYNY3	WP_030005960.1	55.114	528	231	2	16	537	21	548	0.0	589
slr1138	Q06475	cytochrome c oxidase subunit III	ctaEI	ctaEI, ctaE, coxC, ctaE1	Terminal oxidase 1	Photosynthesis & Respiration	TM		26.1	4
BLAST Output	PCC 11901 Accession	Percentage Identity	Alignment Length	Mismatches	Gap Open	Synechocystis sp. PCC 6803 Start	Synechocystis sp. PCC 6803 End	PCC 11901 Start	PCC 11901 End	E-value	Bit Score
sp|Q06475|COX3_SYNY3	WP_138073097.1	68.447	206	56	3	28	233	3	199	1.67e-97	279
sp|Q06475|COX3_SYNY3	WP_138072735.1	41.327	196	113	2	37	232	2	195	7.47e-47	150
sp|Q06475|COX3_SYNY3	WP_138073779.1	31.884	69	38	2	90	153	364	428	0.17	29.3
slr1136	Q06474	cytochrome c oxidase subunit II	ctaCI	coxB, ctaCI, ctaC, ctaC1, coxII	Terminal oxidase 1	Photosynthesis & Respiration
BLAST Output	PCC 11901 Accession	Percentage Identity	Alignment Length	Mismatches	Gap Open	Synechocystis sp. PCC 6803 Start	Synechocystis sp. PCC 6803 End	PCC 11901 Start	PCC 11901 End	E-value	Bit Score
sp|Q06474|COX2_SYNY3	WP_138073096.1	60.436	321	125	1	1	321	1	319	7.50e-146	411
sp|Q06474|COX2_SYNY3	WP_138072737.1	31.250	288	166	5	6	290	10	268	2.82e-47	158
sp|Q06474|COX2_SYNY3	WP_138072408.1	27.660	94	59	4	180	270	115	202	0.13	30.4
sp|Q06474|COX2_SYNY3	WP_045442698.1	29.213	89	53	2	67	151	24	106	0.47	28.5
sll0813	P74044	cytochrome c oxidase subunit II	ctaC	coxB, ctaC, ctaCII, cta2	Terminal oxidase 2	Photosynthesis & Respiration	PM		33.4	3
BLAST Output	PCC 11901 Accession	Percentage Identity	Alignment Length	Mismatches	Gap Open	Synechocystis sp. PCC 6803 Start	Synechocystis sp. PCC 6803 End	PCC 11901 Start	PCC 11901 End	E-value	Bit Score
tr|P74044|P74044_SYNY3	WP_138072737.1	40.136	294	165	3	1	293	1	284	4.13e-77	234
tr|P74044|P74044_SYNY3	WP_138073096.1	32.463	268	162	6	20	270	20	285	1.42e-46	156
slr2082	P73907	cytochrome c oxidase subunit I	ctaDII	ctaD, ctaII, ctaDII, cta2, slr2082	Terminal oxidase 2	Photosynthesis & Respiration	PM		60.7	12
BLAST Output	PCC 11901 Accession	Percentage Identity	Alignment Length	Mismatches	Gap Open	Synechocystis sp. PCC 6803 Start	Synechocystis sp. PCC 6803 End	PCC 11901 Start	PCC 11901 End	E-value	Bit Score
tr|P73907|P73907_SYNY3	WP_030005960.1	64.815	540	187	1	3	542	13	549	0.0	724
tr|P73907|P73907_SYNY3	WP_012306785.1	57.006	521	218	3	12	532	11	525	0.0	617
slr2083	P73908	cytochrome c oxidase subunit III	ctaEII	ctaE, ctaEII, cta2, slr2083	Terminal oxidase 2	Photosynthesis & Respiration	PM		22.2	5
BLAST Output	PCC 11901 Accession	Percentage Identity	Alignment Length	Mismatches	Gap Open	Synechocystis sp. PCC 6803 Start	Synechocystis sp. PCC 6803 End	PCC 11901 Start	PCC 11901 End	E-value	Bit Score
tr|P73908|P73908_SYNY3	WP_138072735.1	56.111	180	79	0	17	196	18	197	4.56e-66	198
tr|P73908|P73908_SYNY3	WP_138073097.1	40.000	185	105	3	12	194	18	198	1.69e-36	123
Phycobilisome
sll0928	P72870	allophycocyanin-B	apcD	apcD, sll0928	Phycobilisome	Photosynthesis & Respiration	Soluble proteins		17.9	0
BLAST Output	PCC 11901 Accession	Percentage Identity	Alignment Length	Mismatches	Gap Open	Synechocystis sp. PCC 6803 Start	Synechocystis sp. PCC 6803 End	PCC 11901 Start	PCC 11901 End	E-value	Bit Score
sp|P72870|APCD_SYNY3	WP_012307741.1	76.398	161	38	0	1	161	1	161	8.10e-92	260
sp|P72870|APCD_SYNY3	WP_012307540.1	49.375	160	81	0	1	160	1	160	4.69e-56	170
sp|P72870|APCD_SYNY3	WP_012307539.1	39.623	159	93	2	4	161	5	161	3.64e-35	117
sp|P72870|APCD_SYNY3	WP_012307244.1	35.338	133	86	0	4	136	5	137	1.62e-25	92.8
sp|P72870|APCD_SYNY3	WP_062435379.1	31.655	139	95	0	3	141	4	142	5.57e-23	86.3
sp|P72870|APCD_SYNY3	WP_012307809.1	30.625	160	107	2	4	161	5	162	8.42e-20	77.8
sp|P72870|APCD_SYNY3	WP_138073547.1	25.854	205	98	6	8	160	25	227	3.30e-12	60.1
sp|P72870|APCD_SYNY3	WP_138071470.1	27.397	73	45	2	14	86	111	175	0.30	27.3
sll1051	P72652	phycocyanin alpha-subunit phycocyanobilin lyase	cpcF	cpcF	Phycobilisome	Photosynthesis & Respiration	Soluble proteins		23.2	0
BLAST Output	PCC 11901 Accession	Percentage Identity	Alignment Length	Mismatches	Gap Open	Synechocystis sp. PCC 6803 Start	Synechocystis sp. PCC 6803 End	PCC 11901 Start	PCC 11901 End	E-value	Bit Score
sp|P72652|CPCF_SYNY3	WP_138073651.1	54.872	195	87	1	11	204	3	197	2.30e-67	202
sp|P72652|CPCF_SYNY3	WP_138073350.1	29.412	136	91	4	54	185	139	273	3.06e-05	40.4
sp|P72652|CPCF_SYNY3	WP_065710659.1	29.050	179	82	8	9	170	4	154	0.041	30.8
sp|P72652|CPCF_SYNY3	WP_065710659.1	30.769	91	51	3	113	202	77	156	0.17	28.9
sll1577	Q54714	phycocyanin beta subunit	cpcB	cpcB, sll1577	Phycobilisome	Photosynthesis & Respiration	Soluble proteins		18.1	0
BLAST Output	PCC 11901 Accession	Percentage Identity	Alignment Length	Mismatches	Gap Open	Synechocystis sp. PCC 6803 Start	Synechocystis sp. PCC 6803 End	PCC 11901 Start	PCC 11901 End	E-value	Bit Score
sp|Q54714|PHCB_SYNY3	WP_062435379.1	75.439	171	42	0	1	171	1	171	7.27e-93	264
sp|Q54714|PHCB_SYNY3	WP_012307539.1	46.154	143	74	2	1	142	1	141	2.66e-39	128
sp|Q54714|PHCB_SYNY3	WP_012307244.1	45.255	137	75	0	1	137	1	137	4.91e-36	120
sp|Q54714|PHCB_SYNY3	WP_012307540.1	37.500	168	95	2	4	171	3	160	7.54e-33	111
sp|Q54714|PHCB_SYNY3	WP_012307741.1	34.286	140	92	0	4	143	3	142	7.91e-22	83.2
sp|Q54714|PHCB_SYNY3	WP_012307809.1	27.434	113	80	1	5	115	5	117	2.60e-10	53.1
sp|Q54714|PHCB_SYNY3	WP_138073547.1	29.048	210	83	9	9	165	25	221	4.21e-10	54.3
sp|Q54714|PHCB_SYNY3	WP_030007398.1	22.951	122	86	4	1	121	1	115	0.17	28.1
sp|Q54714|PHCB_SYNY3	WP_138073791.1	24.684	158	92	6	20	157	293	443	0.77	26.6
sll1578	Q54715	phycocyanin alpha subunit	cpcA	cpcA, sll1578	Phycobilisome	Photosynthesis & Respiration	Soluble proteins		17.6	0
BLAST Output	PCC 11901 Accession	Percentage Identity	Alignment Length	Mismatches	Gap Open	Synechocystis sp. PCC 6803 Start	Synechocystis sp. PCC 6803 End	PCC 11901 Start	PCC 11901 End	E-value	Bit Score
sp|Q54715|PHCA_SYNY3	WP_012307809.1	81.481	162	30	0	1	162	1	162	8.99e-99	278
sp|Q54715|PHCA_SYNY3	WP_012307540.1	29.560	159	108	2	5	161	4	160	1.92e-22	84.7
sp|Q54715|PHCA_SYNY3	WP_012307741.1	29.814	161	107	4	5	162	4	161	8.07e-16	67.4
sp|Q54715|PHCA_SYNY3	WP_012307539.1	28.659	164	112	3	1	162	1	161	4.68e-15	65.5
sp|Q54715|PHCA_SYNY3	WP_012307244.1	23.358	137	103	1	1	137	1	135	1.97e-10	53.1
sp|Q54715|PHCA_SYNY3	WP_062435379.1	30.088	113	77	1	5	117	5	115	1.07e-09	51.2
sp|Q54715|PHCA_SYNY3	WP_138073547.1	45.833	24	13	0	79	102	143	166	0.16	28.5
sp|Q54715|PHCA_SYNY3	WP_138073779.1	28.767	73	44	2	25	90	408	479	0.33	27.7
sp|Q54715|PHCA_SYNY3	WP_168191146.1	36.364	33	19	1	68	100	95	125	0.52	26.9
sll1579	P73204	phycobilisome rod linker polypeptide	cpcC2	cpcC2, cpcC, cpc2	Phycobilisome	Photosynthesis & Respiration	Soluble proteins		30.8	0
BLAST Output	PCC 11901 Accession	Percentage Identity	Alignment Length	Mismatches	Gap Open	Synechocystis sp. PCC 6803 Start	Synechocystis sp. PCC 6803 End	PCC 11901 Start	PCC 11901 End	E-value	Bit Score
sp|P73204|PYR2_SYNY3	WP_012307810.1	50.345	290	125	4	1	273	1	288	7.57e-88	260
sp|P73204|PYR2_SYNY3	WP_138073547.1	37.500	128	77	2	31	156	726	852	9.95e-23	94.0
sp|P73204|PYR2_SYNY3	WP_138073547.1	33.594	128	84	1	31	157	273	400	3.10e-20	86.7
sp|P73204|PYR2_SYNY3	WP_138073547.1	37.600	125	77	1	28	152	526	649	1.14e-17	79.3
sp|P73204|PYR2_SYNY3	WP_062432506.1	34.058	138	90	1	31	167	41	178	1.51e-20	84.7
sp|P73204|PYR2_SYNY3	WP_138072818.1	34.400	125	80	1	28	152	38	160	4.55e-18	77.8
sp|P73204|PYR2_SYNY3	WP_138073566.1	35.714	42	27	0	147	188	1224	1265	0.92	27.3
slr1459	P74551	phycobilisome core component	apcF	apcF, slr1459	Phycobilisome	Photosynthesis & Respiration	Soluble proteins		18.9	0
BLAST Output	PCC 11901 Accession	Percentage Identity	Alignment Length	Mismatches	Gap Open	Synechocystis sp. PCC 6803 Start	Synechocystis sp. PCC 6803 End	PCC 11901 Start	PCC 11901 End	E-value	Bit Score
sp|P74551|APCF_SYNY3	WP_012307244.1	69.231	169	52	0	1	169	1	169	8.64e-83	238
sp|P74551|APCF_SYNY3	WP_012307539.1	56.643	143	57	2	1	141	1	140	9.86e-58	174
sp|P74551|APCF_SYNY3	WP_062435379.1	40.972	144	85	0	1	144	1	144	4.74e-35	117
sp|P74551|APCF_SYNY3	WP_012307540.1	37.956	137	85	0	5	141	4	140	6.01e-31	106
sp|P74551|APCF_SYNY3	WP_012307741.1	33.735	166	97	3	5	165	4	161	5.59e-25	91.3
sp|P74551|APCF_SYNY3	WP_012307809.1	28.205	117	82	1	1	115	1	117	8.15e-12	57.0
sp|P74551|APCF_SYNY3	WP_138073547.1	27.059	170	70	5	17	135	33	199	1.67e-09	52.4
sp|P74551|APCF_SYNY3	WP_030007006.1	25.532	47	32	1	122	168	46	89	0.30	27.3
slr1986	Q01952	allophycocyanin beta subunit	apcB	apcB, slr1986	Phycobilisome	Photosynthesis & Respiration	Soluble proteins		17.2	0
BLAST Output	PCC 11901 Accession	Percentage Identity	Alignment Length	Mismatches	Gap Open	Synechocystis sp. PCC 6803 Start	Synechocystis sp. PCC 6803 End	PCC 11901 Start	PCC 11901 End	E-value	Bit Score
sp|Q01952|APCB_SYNY3	WP_012307539.1	90.683	161	15	0	1	161	1	161	2.10e-106	297
sp|Q01952|APCB_SYNY3	WP_012307244.1	52.318	151	60	3	1	149	1	141	4.04e-49	152
sp|Q01952|APCB_SYNY3	WP_012307540.1	36.478	159	98	2	5	161	4	161	2.46e-35	117
sp|Q01952|APCB_SYNY3	WP_062435379.1	41.176	153	85	2	1	150	1	151	7.15e-35	116
sp|Q01952|APCB_SYNY3	WP_012307741.1	32.278	158	106	1	5	161	4	161	8.11e-29	100
sp|Q01952|APCB_SYNY3	WP_012307809.1	32.121	165	105	5	1	161	1	162	1.03e-18	75.1
sp|Q01952|APCB_SYNY3	WP_138073547.1	36.170	94	50	5	73	161	140	228	1.56e-08	49.3
slr2051	P73093	phycobilisome rod-core linker polypeptide	cpcG1	cpcG1, cpcG, apcG	Phycobilisome	Photosynthesis & Respiration	Soluble proteins		28.9	0
BLAST Output	PCC 11901 Accession	Percentage Identity	Alignment Length	Mismatches	Gap Open	Synechocystis sp. PCC 6803 Start	Synechocystis sp. PCC 6803 End	PCC 11901 Start	PCC 11901 End	E-value	Bit Score
sp|P73093|PYG_SYNY3	WP_138072818.1	66.400	250	80	3	1	249	1	247	3.84e-123	347
sp|P73093|PYG_SYNY3	WP_062432506.1	56.545	191	80	2	1	189	1	190	1.37e-73	221
sp|P73093|PYG_SYNY3	WP_138073547.1	39.706	136	81	1	26	160	514	649	1.95e-25	101
sp|P73093|PYG_SYNY3	WP_138073547.1	36.184	152	91	2	24	172	256	404	6.14e-20	85.1
sp|P73093|PYG_SYNY3	WP_138073547.1	32.624	141	91	2	30	166	715	855	1.54e-19	84.0
sp|P73093|PYG_SYNY3	WP_012307810.1	34.400	125	80	1	38	160	27	151	3.38e-15	70.1
sp|P73093|PYG_SYNY3	WP_138073756.1	24.658	73	54	1	59	130	203	275	0.58	27.7
slr2067	Q01951	allophycocyanin alpha subunit	apcA	apcA	Phycobilisome	Photosynthesis & Respiration	Soluble proteins		17.4	0
BLAST Output	PCC 11901 Accession	Percentage Identity	Alignment Length	Mismatches	Gap Open	Synechocystis sp. PCC 6803 Start	Synechocystis sp. PCC 6803 End	PCC 11901 Start	PCC 11901 End	E-value	Bit Score
sp|Q01951|PHAA_SYNY3	WP_012307540.1	86.875	160	21	0	1	160	1	160	4.07e-103	289
sp|Q01951|PHAA_SYNY3	WP_012307741.1	47.205	161	85	0	1	161	1	161	2.39e-50	155
sp|Q01951|PHAA_SYNY3	WP_012307539.1	38.608	158	96	1	4	161	5	161	1.40e-38	125
sp|Q01951|PHAA_SYNY3	WP_012307244.1	37.121	132	83	0	4	135	5	136	4.33e-28	99.4
sp|Q01951|PHAA_SYNY3	WP_062435379.1	36.691	139	88	0	3	141	4	142	4.58e-28	99.4
sp|Q01951|PHAA_SYNY3	WP_012307809.1	31.250	160	106	2	4	161	5	162	2.41e-23	87.0
sp|Q01951|PHAA_SYNY3	WP_138073547.1	23.944	213	108	6	1	161	18	228	2.23e-10	54.7
sp|Q01951|PHAA_SYNY3	WP_138073272.1	32.813	64	32	3	41	99	144	201	0.12	28.9
ssl3093	P73202	phycobilisome small rod linker polypeptide	cpcD	cpcD, ssl3093	Phycobilisome	Photosynthesis & Respiration	Soluble proteins		9.3	0
BLAST Output	PCC 11901 Accession	Percentage Identity	Alignment Length	Mismatches	Gap Open	Synechocystis sp. PCC 6803 Start	Synechocystis sp. PCC 6803 End	PCC 11901 Start	PCC 11901 End	E-value	Bit Score
sp|P73202|PYS1_SYNY3	WP_012307811.1	68.254	63	20	0	13	75	9	71	1.79e-28	94.7
sp|P73202|PYS1_SYNY3	WP_012306481.1	53.247	77	33	2	1	76	1	75	5.43e-20	78.6
sp|P73202|PYS1_SYNY3	WP_138071337.1	48.148	27	11	1	52	75	181	207	0.057	27.7
sp|P73202|PYS1_SYNY3	WP_012307538.1	41.667	24	14	0	50	73	31	54	0.36	24.6
ssr3383	Q01950	phycobilisome small core linker polypeptide	apcC	apcC, ssr3383	Phycobilisome	Photosynthesis & Respiration	Soluble proteins		7.8	0
BLAST Output	PCC 11901 Accession	Percentage Identity	Alignment Length	Mismatches	Gap Open	Synechocystis sp. PCC 6803 Start	Synechocystis sp. PCC 6803 End	PCC 11901 Start	PCC 11901 End	E-value	Bit Score
sp|Q01950|PYC1_SYNY3	WP_012307538.1	89.552	67	7	0	1	67	1	67	8.69e-43	129
sp|Q01950|PYC1_SYNY3	WP_012307811.1	42.424	33	19	0	31	63	46	78	4.16e-04	32.0
sp|Q01950|PYC1_SYNY3	WP_012306481.1	47.059	34	13	1	31	64	49	77	0.005	30.0
sll1471	P74625	phycobilisome rod-core linker polypeptide	cpcG2	cpcG2, cpcG	Phycobilisome	Photosynthesis & Respiration	TM		28.5	1
BLAST Output	PCC 11901 Accession	Percentage Identity	Alignment Length	Mismatches	Gap Open	Synechocystis sp. PCC 6803 Start	Synechocystis sp. PCC 6803 End	PCC 11901 Start	PCC 11901 End	E-value	Bit Score
sp|P74625|CPCL_SYNY3	WP_062432506.1	56.175	251	99	3	1	249	1	242	2.06e-99	286
sp|P74625|CPCL_SYNY3	WP_138072818.1	59.162	191	75	2	1	190	1	189	1.02e-74	224
sp|P74625|CPCL_SYNY3	WP_138073547.1	32.639	144	95	1	26	167	711	854	1.75e-22	92.8
sp|P74625|CPCL_SYNY3	WP_138073547.1	39.695	131	78	1	32	162	520	649	4.17e-21	88.6
sp|P74625|CPCL_SYNY3	WP_138073547.1	34.783	138	89	1	26	162	258	395	8.56e-20	84.7
sp|P74625|CPCL_SYNY3	WP_012307810.1	36.296	135	85	1	45	179	34	167	3.24e-18	78.6
sll1580	P73203	phycobilisome rod linker polypeptide	cpcC1	cpcC1, cpcH, cpcC, cpcC2, cpc1	Phycobilisome	Photosynthesis & Respiration	Unknown		32.5	0
BLAST Output	PCC 11901 Accession	Percentage Identity	Alignment Length	Mismatches	Gap Open	Synechocystis sp. PCC 6803 Start	Synechocystis sp. PCC 6803 End	PCC 11901 Start	PCC 11901 End	E-value	Bit Score
sp|P73203|PYR1_SYNY3	WP_012307810.1	64.014	289	102	2	1	288	1	288	1.93e-135	381
sp|P73203|PYR1_SYNY3	WP_138073547.1	38.931	131	79	1	23	152	265	395	2.28e-24	99.4
sp|P73203|PYR1_SYNY3	WP_138073547.1	39.370	127	76	1	27	153	525	650	1.00e-23	97.4
sp|P73203|PYR1_SYNY3	WP_138073547.1	36.170	141	86	2	16	153	711	850	4.48e-23	95.5
sp|P73203|PYR1_SYNY3	WP_062432506.1	33.125	160	99	3	27	183	37	191	3.60e-19	81.3
sp|P73203|PYR1_SYNY3	WP_138072818.1	37.705	122	74	1	31	152	41	160	4.30e-19	81.3
sp|P73203|PYR1_SYNY3	WP_012306481.1	39.655	58	31	2	235	288	17	74	6.67e-06	43.5
sp|P73203|PYR1_SYNY3	WP_012307811.1	52.941	34	15	1	255	287	37	70	4.02e-05	38.1
sp|P73203|PYR1_SYNY3	WP_138073589.1	35.484	31	20	0	118	148	55	85	0.87	27.3
slr0335	Q55544	phycobilisome core-membrane linker polypeptide	apcE	apcE, slr0335	Phycobilisome	Photosynthesis & Respiration	Unknown		100.2	0
BLAST Output	PCC 11901 Accession	Percentage Identity	Alignment Length	Mismatches	Gap Open	Synechocystis sp. PCC 6803 Start	Synechocystis sp. PCC 6803 End	PCC 11901 Start	PCC 11901 End	E-value	Bit Score
sp|Q55544|APCE_SYNY3	WP_138073547.1	72.717	898	227	6	1	893	1	885	0.0	1348
sp|Q55544|APCE_SYNY3	WP_012307810.1	37.795	127	78	1	533	658	25	151	5.63e-22	94.0
sp|Q55544|APCE_SYNY3	WP_012307810.1	36.567	134	81	2	725	857	21	151	1.64e-21	92.4
sp|Q55544|APCE_SYNY3	WP_012307810.1	33.793	145	95	1	260	404	13	156	3.46e-21	91.7
sp|Q55544|APCE_SYNY3	WP_062432506.1	36.879	141	87	1	722	862	29	167	6.86e-22	92.4
sp|Q55544|APCE_SYNY3	WP_062432506.1	37.302	126	78	1	534	658	37	162	2.08e-20	88.2
sp|Q55544|APCE_SYNY3	WP_062432506.1	30.882	136	91	2	265	399	29	162	5.34e-17	78.2
sp|Q55544|APCE_SYNY3	WP_138072818.1	36.975	119	71	2	739	857	46	160	9.81e-21	89.4
sp|Q55544|APCE_SYNY3	WP_138072818.1	36.296	135	83	2	273	407	37	168	1.96e-19	85.5
sp|Q55544|APCE_SYNY3	WP_138072818.1	35.484	124	79	1	535	658	38	160	2.08e-18	82.4
sp|Q55544|APCE_SYNY3	WP_012307539.1	28.704	216	91	8	18	229	2	158	5.99e-15	70.1
sp|Q55544|APCE_SYNY3	WP_012307540.1	23.502	217	108	6	18	232	1	161	3.20e-10	56.2
sp|Q55544|APCE_SYNY3	WP_012307809.1	40.741	54	32	0	24	77	8	61	6.50e-06	43.9
sp|Q55544|APCE_SYNY3	WP_012307741.1	23.585	212	102	7	19	227	2	156	3.44e-05	41.6
sp|Q55544|APCE_SYNY3	WP_012307244.1	24.064	187	82	5	23	205	7	137	1.84e-04	39.7
sp|Q55544|APCE_SYNY3	WP_062435379.1	25.767	163	62	5	25	184	9	115	3.38e-04	38.9
slr1878	P73638	phycocyanin alpha-subunit phycocyanobilin lyase	cpcE	cpcE	Phycobilisome	Photosynthesis & Respiration	Unknown		29.4	0
BLAST Output	PCC 11901 Accession	Percentage Identity	Alignment Length	Mismatches	Gap Open	Synechocystis sp. PCC 6803 Start	Synechocystis sp. PCC 6803 End	PCC 11901 Start	PCC 11901 End	E-value	Bit Score
sp|P73638|CPCE_SYNY3	WP_138073650.1	61.029	272	102	1	1	272	1	268	2.29e-105	303
sp|P73638|CPCE_SYNY3	WP_138073350.1	32.184	174	89	8	24	190	170	321	1.58e-07	48.1
sp|P73638|CPCE_SYNY3	WP_065710659.1	33.333	120	67	2	62	180	78	185	1.39e-05	41.6
sp|P73638|CPCE_SYNY3	WP_065710659.1	25.000	124	81	2	62	185	110	221	0.11	29.6
sp|P73638|CPCE_SYNY3	WP_138072299.1	31.304	115	55	3	67	177	116	210	0.002	35.0
sp|P73638|CPCE_SYNY3	WP_099239252.1	28.313	166	103	5	28	187	77	232	0.037	31.2
sp|P73638|CPCE_SYNY3	WP_138073651.1	32.308	65	32	1	60	112	104	168	0.11	29.6
sp|P73638|CPCE_SYNY3	WP_030006664.1	32.759	58	36	1	218	272	17	74	0.76	26.6
sp|P73638|CPCE_SYNY3	WP_138073164.1	85.714	14	2	0	12	25	93	106	0.77	27.3
sll1663	P72807	phycocyanin alpha phycocyanobilin lyase related protein		nblB1, nblB	Phycobilisome degradation	Photosynthesis & Respiration	Soluble proteins		24.1	0
BLAST Output	PCC 11901 Accession	Percentage Identity	Alignment Length	Mismatches	Gap Open	Synechocystis sp. PCC 6803 Start	Synechocystis sp. PCC 6803 End	PCC 11901 Start	PCC 11901 End	E-value	Bit Score
tr|P72807|P72807_SYNY3	WP_138072299.1	52.778	216	102	0	4	219	3	218	2.64e-71	213
tr|P72807|P72807_SYNY3	WP_065710659.1	35.377	212	134	1	4	215	5	213	2.33e-28	103
tr|P72807|P72807_SYNY3	WP_138072408.1	30.769	117	67	5	88	191	705	820	0.016	32.3
tr|P72807|P72807_SYNY3	WP_138073650.1	36.364	77	38	4	130	198	42	115	0.26	28.5
ssl0452	P73891	phycobilisome degradation protein NblA	nblA1	nblA1, nblA, ssl0452	Phycobilisome degradation	Photosynthesis & Respiration
BLAST Output	PCC 11901 Accession	Percentage Identity	Alignment Length	Mismatches	Gap Open	Synechocystis sp. PCC 6803 Start	Synechocystis sp. PCC 6803 End	PCC 11901 Start	PCC 11901 End	E-value	Bit Score
sp|P73891|NBLA1_SYNY3	WP_030006436.1	27.273	55	40	0	1	55	1	55	1.88e-04	32.3
sp|P73891|NBLA1_SYNY3	WP_030006375.1	34.615	52	33	1	1	52	1	51	7.89e-04	30.4
sp|P73891|NBLA1_SYNY3	WP_138073559.1	33.333	27	18	0	34	60	16	42	0.41	24.6
ssl0453	P73890	phycobilisome degradation protein NblA	nblA2	nblA2, nblA, ssl0453	Phycobilisome degradation	Photosynthesis & Respiration
BLAST Output	PCC 11901 Accession	Percentage Identity	Alignment Length	Mismatches	Gap Open	Synechocystis sp. PCC 6803 Start	Synechocystis sp. PCC 6803 End	PCC 11901 Start	PCC 11901 End	E-value	Bit Score
sp|P73890|NBLA2_SYNY3	WP_030006436.1	35.185	54	32	1	3	56	5	55	1.23e-07	40.4
sp|P73890|NBLA2_SYNY3	WP_030006375.1	38.776	49	30	0	8	56	6	54	6.01e-07	38.5
sp|P73890|NBLA2_SYNY3	WP_138071989.1	36.667	30	19	0	31	60	121	150	0.42	24.3
slr1963	P74102	orange carotenoid protein	ocp	ocp, slr1963	Random proteins (Hypothetical)	Random proteins (Hypothetical)	Soluble proteins	0.69688831	34.6	0.0
BLAST Output	PCC 11901 Accession	Percentage Identity	Alignment Length	Mismatches	Gap Open	Synechocystis sp. PCC 6803 Start	Synechocystis sp. PCC 6803 End	PCC 11901 Start	PCC 11901 End	E-value	Bit Score
sp|P74102|OCP_SYNY3	WP_138071871.1	72.414	319	86	2	1	317	1	319	1.37e-171	475
sp|P74102|OCP_SYNY3	WP_030008239.1	28.358	67	47	1	204	270	73	138	0.61	27.3
sp|P74102|OCP_SYNY3	WP_065710854.1	48.148	27	13	1	272	297	225	251	0.80	27.7
ATP synthase
sll1322	P27178	ATP synthase A chain of CF(0)	atpI	atpI, atpB, sll1322	ATP synthase	Photosynthesis & Respiration	TM		27.4	6
BLAST Output	PCC 11901 Accession	Percentage Identity	Alignment Length	Mismatches	Gap Open	Synechocystis sp. PCC 6803 Start	Synechocystis sp. PCC 6803 End	PCC 11901 Start	PCC 11901 End	E-value	Bit Score
sp|P27178|ATP6_SYNY3	WP_173867214.1	75.203	246	60	1	27	272	1	245	1.17e-128	362
sp|P27178|ATP6_SYNY3	WP_012305625.1	37.156	218	120	6	63	276	21	225	2.38e-32	115
sll1323	P27183	ATP synthase subunit b' of CF(0)	atpG	atpG, atp, sll1323	ATP synthase	Photosynthesis & Respiration	TM		16.2	1
BLAST Output	PCC 11901 Accession	Percentage Identity	Alignment Length	Mismatches	Gap Open	Synechocystis sp. PCC 6803 Start	Synechocystis sp. PCC 6803 End	PCC 11901 Start	PCC 11901 End	E-value	Bit Score
sp|P27183|ATPF2_SYNY3	WP_012306366.1	55.319	141	63	0	1	141	21	161	2.85e-50	154
sp|P27183|ATPF2_SYNY3	WP_012306365.1	20.930	129	99	1	4	129	15	143	0.001	34.3
sp|P27183|ATPF2_SYNY3	WP_138073855.1	30.357	112	67	2	13	124	13	113	0.005	32.3
sll1324	P27181	ATP synthase B chain (subunit I) of CF(0)	atpF	atpF, sll1324	ATP synthase	Photosynthesis & Respiration	TM		19.8	1
BLAST Output	PCC 11901 Accession	Percentage Identity	Alignment Length	Mismatches	Gap Open	Synechocystis sp. PCC 6803 Start	Synechocystis sp. PCC 6803 End	PCC 11901 Start	PCC 11901 End	E-value	Bit Score
sp|P27181|ATPF_SYNY3	WP_012306365.1	45.732	164	89	0	15	178	10	173	6.37e-44	140
sp|P27181|ATPF_SYNY3	WP_138073855.1	25.676	148	110	0	29	176	10	157	3.21e-09	51.2
sp|P27181|ATPF_SYNY3	WP_012306366.1	25.828	151	74	5	1	146	1	118	0.11	28.9
sll1325	P27180	ATP synthase delta chain of CF(1)	atpD	atpD, atpH, sll1325	ATP synthase	Photosynthesis & Respiration	TM		20.1	0
BLAST Output	PCC 11901 Accession	Percentage Identity	Alignment Length	Mismatches	Gap Open	Synechocystis sp. PCC 6803 Start	Synechocystis sp. PCC 6803 End	PCC 11901 Start	PCC 11901 End	E-value	Bit Score
sp|P27180|ATPD_SYNY3	WP_138072743.1	53.039	181	85	0	1	181	1	181	2.22e-67	201
sp|P27180|ATPD_SYNY3	WP_168191144.1	41.026	39	21	1	6	44	143	179	0.10	29.3
sp|P27180|ATPD_SYNY3	WP_138071654.1	47.826	23	11	1	12	34	490	511	0.48	27.3
sll1326	P27179	ATP synthase alpha chain	atpA	atpA	ATP synthase	Photosynthesis & Respiration	Unknown		53.9	0
BLAST Output	PCC 11901 Accession	Percentage Identity	Alignment Length	Mismatches	Gap Open	Synechocystis sp. PCC 6803 Start	Synechocystis sp. PCC 6803 End	PCC 11901 Start	PCC 11901 End	E-value	Bit Score
sp|P27179|ATPA_SYNY3	WP_030005968.1	84.095	503	80	0	1	503	1	503	0.0	871
sp|P27179|ATPA_SYNY3	WP_138073856.1	48.466	489	246	1	13	495	19	507	1.36e-166	478
sp|P27179|ATPA_SYNY3	WP_030007913.1	23.798	416	302	7	19	424	3	413	3.06e-28	113
sp|P27179|ATPA_SYNY3	WP_012306378.1	23.514	370	267	6	67	424	58	423	6.89e-24	100
sp|P27179|ATPA_SYNY3	WP_012307760.1	39.583	48	24	1	456	503	516	558	0.27	30.4
sp|P27179|ATPA_SYNY3	WP_168191131.1	36.842	38	17	1	159	189	64	101	0.45	29.3
sll1327	P17253	ATP synthase gamma chain	atpC	atpC, atpG	ATP synthase	Photosynthesis & Respiration	Unknown		34.6	0
BLAST Output	PCC 11901 Accession	Percentage Identity	Alignment Length	Mismatches	Gap Open	Synechocystis sp. PCC 6803 Start	Synechocystis sp. PCC 6803 End	PCC 11901 Start	PCC 11901 End	E-value	Bit Score
sp|P17253|ATPG_SYNY3	WP_030005967.1	75.478	314	77	0	1	314	1	314	2.35e-170	472
sp|P17253|ATPG_SYNY3	WP_138073857.1	26.380	326	203	8	1	314	1	301	3.23e-20	85.9
slr1329	P26527	ATP synthase beta subunit	atpB	atpD, atpB	ATP synthase	Photosynthesis & Respiration	Unknown		51.7	0
BLAST Output	PCC 11901 Accession	Percentage Identity	Alignment Length	Mismatches	Gap Open	Synechocystis sp. PCC 6803 Start	Synechocystis sp. PCC 6803 End	PCC 11901 Start	PCC 11901 End	E-value	Bit Score
sp|P26527|ATPB_SYNY3	WP_012306378.1	87.552	482	59	1	1	482	1	481	0.0	856
sp|P26527|ATPB_SYNY3	WP_030007913.1	52.677	467	207	3	8	474	11	463	1.08e-170	485
sp|P26527|ATPB_SYNY3	WP_138073856.1	28.226	372	245	8	59	423	79	435	9.81e-28	112
sp|P26527|ATPB_SYNY3	WP_030005968.1	25.424	413	268	10	59	460	67	450	2.95e-21	92.8
sp|P26527|ATPB_SYNY3	WP_138073288.1	32.051	78	45	2	116	193	46	115	0.20	30.4
slr1330	P26533	ATP synthase epsilon chain of CF(1)	atpE	atpC, atpE, atpB	ATP synthase	Photosynthesis & Respiration	Unknown		14.6	0
BLAST Output	PCC 11901 Accession	Percentage Identity	Alignment Length	Mismatches	Gap Open	Synechocystis sp. PCC 6803 Start	Synechocystis sp. PCC 6803 End	PCC 11901 Start	PCC 11901 End	E-value	Bit Score
sp|P26533|ATPE_SYNY3	WP_012306379.1	57.463	134	55	2	1	134	1	132	1.26e-47	147
sp|P26533|ATPE_SYNY3	WP_030007031.1	32.609	46	28	1	60	105	120	162	0.88	25.8
ssl2615	P27182	ATP synthase C chain of CF(0)	atpH	atpH, atpE, ssl2615	ATP synthase	Photosynthesis & Respiration	Unknown		8	2
BLAST Output	PCC 11901 Accession	Percentage Identity	Alignment Length	Mismatches	Gap Open	Synechocystis sp. PCC 6803 Start	Synechocystis sp. PCC 6803 End	PCC 11901 Start	PCC 11901 End	E-value	Bit Score
sp|P27182|ATPL_SYNY3	WP_012306367.1	87.654	81	10	0	1	81	1	81	1.89e-34	109
sp|P27182|ATPL_SYNY3	WP_012305626.1	39.474	76	46	0	5	80	7	82	5.43e-17	65.9
sll1321	P27196	hypothetical protein		atp1	ATP synthase	Photosynthesis & Respiration
BLAST Output	PCC 11901 Accession	Percentage Identity	Alignment Length	Mismatches	Gap Open	Synechocystis sp. PCC 6803 Start	Synechocystis sp. PCC 6803 End	PCC 11901 Start	PCC 11901 End	E-value	Bit Score
sp|P27196|ATPZ_SYNY3	WP_138073768.1	48.182	110	57	0	1	110	1	110	1.51e-30	102
Carboxysome proteins
sll1031	P72758	carbon dioxide concentrating mechanism protein CcmM, putative carboxysome structural protein	ccmM	ccmM	Carboxysome proteins	Photosynthesis & Respiration	PM		73.1	0
BLAST Output	PCC 11901 Accession	Percentage Identity	Alignment Length	Mismatches	Gap Open	Synechocystis sp. PCC 6803 Start	Synechocystis sp. PCC 6803 End	PCC 11901 Start	PCC 11901 End	E-value	Bit Score
sp|P72758|CCMM_SYNY3	WP_138073466.1	45.753	671	343	5	23	687	6	661	0.0	572
sp|P72758|CCMM_SYNY3	WP_138071492.1	30.400	125	73	5	30	152	4	116	1.97e-06	45.1
sp|P72758|CCMM_SYNY3	WP_138073759.1	28.571	133	63	7	29	158	47	150	6.53e-04	37.7
sp|P72758|CCMM_SYNY3	WP_012307407.1	21.687	83	63	1	366	446	25	107	0.002	35.0
sp|P72758|CCMM_SYNY3	WP_012307407.1	22.093	86	65	1	604	687	21	106	0.003	34.7
sp|P72758|CCMM_SYNY3	WP_012307407.1	22.917	48	37	0	515	562	59	106	0.022	32.3
sp|P72758|CCMM_SYNY3	WP_012307407.1	20.930	86	66	1	244	327	21	106	0.21	29.3
sp|P72758|CCMM_SYNY3	WP_138072945.1	29.630	81	55	2	89	168	124	203	0.20	31.2
sp|P72758|CCMM_SYNY3	WP_168191151.1	43.750	32	18	0	43	74	5	36	0.38	29.6
sp|P72758|CCMM_SYNY3	WP_138073561.1	28.000	50	31	1	40	84	280	329	0.54	29.6
sll0934	P72864	carboxysome formation protein CcmA	ccmA	ccmA	Carboxysome proteins	Photosynthesis & Respiration	Soluble proteins		37.6	0
BLAST Output	PCC 11901 Accession	Percentage Identity	Alignment Length	Mismatches	Gap Open	Synechocystis sp. PCC 6803 Start	Synechocystis sp. PCC 6803 End	PCC 11901 Start	PCC 11901 End	E-value	Bit Score
tr|P72864|P72864_SYNY3	WP_012307436.1	77.746	346	77	0	1	346	1	346	0.0	555
tr|P72864|P72864_SYNY3	WP_138073372.1	31.148	61	33	2	11	70	15	67	0.20	30.0
sll1028	P72761	carbon dioxide concentrating mechanism protein CcmK	ccmK2	ccmK2, ccmK, sll1029, sll1028	Carboxysome proteins	Photosynthesis & Respiration	Soluble proteins		11.1	0
BLAST Output	PCC 11901 Accession	Percentage Identity	Alignment Length	Mismatches	Gap Open	Synechocystis sp. PCC 6803 Start	Synechocystis sp. PCC 6803 End	PCC 11901 Start	PCC 11901 End	E-value	Bit Score
sp|P72761|CCMK2_SYNY3	WP_012307414.1	97.087	103	3	0	1	103	1	103	1.97e-69	199
sp|P72761|CCMK2_SYNY3	WP_012307413.1	90.099	101	10	0	1	101	1	101	1.43e-62	182
sp|P72761|CCMK2_SYNY3	WP_062436058.1	58.163	98	41	0	4	101	6	103	2.34e-36	116
sp|P72761|CCMK2_SYNY3	WP_062436057.1	46.078	102	55	0	1	102	1	102	5.04e-28	95.1
sp|P72761|CCMK2_SYNY3	WP_012307985.1	48.864	88	43	1	4	91	130	215	1.28e-22	85.5
sp|P72761|CCMK2_SYNY3	WP_012307985.1	41.346	104	57	2	2	103	22	123	3.58e-20	79.0
sll1029	P72760	carbon dioxide concentrating mechanism protein CcmK	ccmK1	ccmK1, ccmK, sll1029	Carboxysome proteins	Photosynthesis & Respiration	Soluble proteins		12.1	0
BLAST Output	PCC 11901 Accession	Percentage Identity	Alignment Length	Mismatches	Gap Open	Synechocystis sp. PCC 6803 Start	Synechocystis sp. PCC 6803 End	PCC 11901 Start	PCC 11901 End	E-value	Bit Score
sp|P72760|CCMK1_SYNY3	WP_012307413.1	88.288	111	13	0	1	111	1	111	6.05e-69	199
sp|P72760|CCMK1_SYNY3	WP_012307414.1	91.089	101	9	0	1	101	1	101	4.87e-62	181
sp|P72760|CCMK1_SYNY3	WP_062436058.1	55.446	101	45	0	4	104	6	106	6.27e-34	110
sp|P72760|CCMK1_SYNY3	WP_062436057.1	46.535	101	54	0	1	101	1	101	4.89e-28	95.1
sp|P72760|CCMK1_SYNY3	WP_012307985.1	40.000	110	62	2	4	111	130	237	3.08e-20	79.3
sp|P72760|CCMK1_SYNY3	WP_012307985.1	42.222	90	50	1	2	91	22	109	1.58e-18	74.7
sll1030	P72759	carbon dioxide concentrating mechanism protein CcmL, putative carboxysome assembly protein	ccmL	ccmL	Carboxysome proteins	Photosynthesis & Respiration	Soluble proteins		10.6	0
BLAST Output	PCC 11901 Accession	Percentage Identity	Alignment Length	Mismatches	Gap Open	Synechocystis sp. PCC 6803 Start	Synechocystis sp. PCC 6803 End	PCC 11901 Start	PCC 11901 End	E-value	Bit Score
sp|P72759|CCML_SYNY3	WP_012307412.1	69.697	99	30	0	1	99	1	99	9.49e-46	139
sp|P72759|CCML_SYNY3	WP_138072468.1	28.571	56	37	1	30	85	122	174	0.16	26.9
slr0436	Q55121	carbon dioxide concentrating mechanism protein CcmO	ccmO	ccmO, ccmK	Carboxysome proteins	Photosynthesis & Respiration	Soluble proteins		32.3	0
BLAST Output	PCC 11901 Accession	Percentage Identity	Alignment Length	Mismatches	Gap Open	Synechocystis sp. PCC 6803 Start	Synechocystis sp. PCC 6803 End	PCC 11901 Start	PCC 11901 End	E-value	Bit Score
sp|Q55121|CCMO_SYNY3	WP_012307985.1	75.465	269	52	3	26	294	18	272	7.26e-140	392
sp|Q55121|CCMO_SYNY3	WP_012307985.1	41.509	106	62	0	21	126	119	224	5.58e-25	97.8
sp|Q55121|CCMO_SYNY3	WP_012307414.1	46.078	102	51	2	32	131	4	103	1.73e-23	89.4
sp|Q55121|CCMO_SYNY3	WP_012307414.1	48.864	88	43	1	138	223	4	91	1.53e-21	84.0
sp|Q55121|CCMO_SYNY3	WP_012307413.1	48.864	88	43	1	32	117	4	91	1.49e-21	84.3
sp|Q55121|CCMO_SYNY3	WP_012307413.1	45.455	88	46	1	138	223	4	91	1.39e-18	76.3
sp|Q55121|CCMO_SYNY3	WP_062436058.1	41.304	92	52	1	28	117	2	93	2.09e-18	75.9
sp|Q55121|CCMO_SYNY3	WP_062436058.1	35.714	98	59	2	138	233	6	101	1.88e-11	56.6
sp|Q55121|CCMO_SYNY3	WP_062436057.1	37.500	88	53	1	32	117	4	91	2.26e-15	67.4
sp|Q55121|CCMO_SYNY3	WP_062436057.1	30.682	88	59	1	138	223	4	91	1.20e-08	48.5
slr1838	P73406	carbon dioxide concentrating mechanism protein CcmK homolog 3, putative carboxysome assembly protein	ccmK3	ccmK3, ccmK, slr1838	Carboxysome proteins	Photosynthesis & Respiration	Soluble proteins		11	0
BLAST Output	PCC 11901 Accession	Percentage Identity	Alignment Length	Mismatches	Gap Open	Synechocystis sp. PCC 6803 Start	Synechocystis sp. PCC 6803 End	PCC 11901 Start	PCC 11901 End	E-value	Bit Score
sp|P73406|CCMK3_SYNY3	WP_062436057.1	62.136	103	38	1	1	103	1	102	3.67e-44	135
sp|P73406|CCMK3_SYNY3	WP_012307414.1	51.456	103	49	1	1	103	1	102	3.25e-30	100
sp|P73406|CCMK3_SYNY3	WP_062436058.1	52.525	99	46	1	4	102	6	103	4.77e-27	92.8
sp|P73406|CCMK3_SYNY3	WP_012307413.1	49.020	102	51	1	1	102	1	101	6.59e-27	92.4
sp|P73406|CCMK3_SYNY3	WP_012307985.1	36.559	93	55	2	3	94	129	218	2.80e-11	54.7
sp|P73406|CCMK3_SYNY3	WP_012307985.1	31.461	89	58	1	4	92	24	109	2.07e-10	52.4
sp|P73406|CCMK3_SYNY3	WP_138072424.1	22.642	53	41	0	49	101	401	453	0.15	27.3
sp|P73406|CCMK3_SYNY3	WP_138072100.1	50.000	14	7	0	80	93	180	193	1.00	25.0
slr1839	P73407	carbon dioxide concentrating mechanism protein CcmK homolog 4, putative carboxysome assembly protein	ccmK4	ccmK4, ccmK, slr1839	Carboxysome proteins	Photosynthesis & Respiration	Soluble proteins		11.9	0
BLAST Output	PCC 11901 Accession	Percentage Identity	Alignment Length	Mismatches	Gap Open	Synechocystis sp. PCC 6803 Start	Synechocystis sp. PCC 6803 End	PCC 11901 Start	PCC 11901 End	E-value	Bit Score
sp|P73407|CCMK4_SYNY3	WP_062436058.1	73.148	108	29	0	1	108	1	108	1.96e-56	167
sp|P73407|CCMK4_SYNY3	WP_012307414.1	56.122	98	43	0	6	103	4	101	8.40e-35	112
sp|P73407|CCMK4_SYNY3	WP_012307413.1	53.000	100	47	0	6	105	4	103	2.10e-34	111
sp|P73407|CCMK4_SYNY3	WP_062436057.1	49.000	100	51	0	4	103	2	101	4.50e-28	95.5
sp|P73407|CCMK4_SYNY3	WP_012307985.1	33.708	89	57	1	5	93	23	109	2.67e-11	55.1
sp|P73407|CCMK4_SYNY3	WP_012307985.1	35.227	88	55	1	6	93	130	215	7.87e-11	53.9
sll1032	P72757	carbon dioxide concentrating mechanism protein CcmN, putative carboxysome assembly protein	ccmN	ccmN	Carboxysome proteins	Photosynthesis & Respiration	Unknown		25	0
BLAST Output	PCC 11901 Accession	Percentage Identity	Alignment Length	Mismatches	Gap Open	Synechocystis sp. PCC 6803 Start	Synechocystis sp. PCC 6803 End	PCC 11901 Start	PCC 11901 End	E-value	Bit Score
sp|P72757|CCMN_SYNY3	WP_168191151.1	38.095	231	123	7	16	241	13	228	7.17e-26	97.8
sp|P72757|CCMN_SYNY3	WP_138073466.1	32.117	137	61	8	4	112	20	152	2.02e-05	41.6
sp|P72757|CCMN_SYNY3	WP_084150040.1	23.750	80	56	2	38	115	64	140	0.16	28.9
sp|P72757|CCMN_SYNY3	WP_062436083.1	26.471	68	45	2	43	106	367	433	0.84	27.3
slr1347	Q54735	beta-type carbonic anhydrase localized in the carboxysome		icfA, ccaA, cab, cca	Carboxysome proteins	Photosynthesis & Respiration	Unknown		34.8	0
BLAST Output	PCC 11901 Accession	Percentage Identity	Alignment Length	Mismatches	Gap Open	Synechocystis sp. PCC 6803 Start	Synechocystis sp. PCC 6803 End	PCC 11901 Start	PCC 11901 End	E-value	Bit Score
sp|Q54735|CYNT_SYNY3	WP_012307606.1	66.222	225	76	0	1	225	1	225	8.32e-113	322
sp|Q54735|CYNT_SYNY3	WP_138072911.1	36.957	46	27	1	221	266	50	93	0.92	26.9
Isi protein
sll0247	Q55274	iron-stress chlorophyll-binding protein, homologous to psbC (CP43)	isiA	isiA, psbC, sll0247	Iron-stress chlorophyll-binding protein	Photosynthesis & Respiration	TM		37.2	6
BLAST Output	PCC 11901 Accession	Percentage Identity	Alignment Length	Mismatches	Gap Open	Synechocystis sp. PCC 6803 Start	Synechocystis sp. PCC 6803 End	PCC 11901 Start	PCC 11901 End	E-value	Bit Score
sp|Q55274|ISIA_SYNY3	WP_138073172.1	75.221	339	83	1	1	339	1	338	4.65e-170	473
sp|Q55274|ISIA_SYNY3	WP_030008145.1	49.821	279	126	3	7	274	16	291	2.79e-93	282
sp|Q55274|ISIA_SYNY3	WP_030008145.1	72.727	22	6	0	300	321	410	431	1.53e-04	39.7
sp|Q55274|ISIA_SYNY3	WP_012307371.1	27.778	288	160	11	13	274	5	270	2.27e-09	55.1
sp|Q55274|ISIA_SYNY3	WP_012307371.1	37.500	32	20	0	298	329	446	477	0.63	28.1
Cell division proteins
sll0169	Q55559	cell division protein Ftn2 homolog		zipN, ftn2	Cell division	Cellular Processes	PM		79.4	1
BLAST Output	PCC 11901 Accession	Percentage Identity	Alignment Length	Mismatches	Gap Open	Synechocystis sp. PCC 6803 Start	Synechocystis sp. PCC 6803 End	PCC 11901 Start	PCC 11901 End	E-value	Bit Score
tr|Q55559|Q55559_SYNY3	WP_138072307.1	35.458	753	407	16	1	710	1	717	1.29e-100	321
tr|Q55559|Q55559_SYNY3	WP_138073517.1	36.232	69	41	2	6	71	8	76	7.53e-07	48.1
tr|Q55559|Q55559_SYNY3	WP_030005933.1	31.746	63	43	0	6	68	4	66	0.005	36.2
tr|Q55559|Q55559_SYNY3	WP_099240660.1	32.308	65	40	3	6	67	5	68	0.026	33.5
tr|Q55559|Q55559_SYNY3	WP_138071518.1	27.848	79	42	2	5	72	1	75	0.045	33.1
tr|Q55559|Q55559_SYNY3	WP_138071195.1	39.623	53	24	2	426	478	47	91	0.16	30.4
tr|Q55559|Q55559_SYNY3	WP_030006610.1	29.412	68	39	2	6	68	6	69	0.31	30.4
tr|Q55559|Q55559_SYNY3	WP_168191173.1	25.000	120	83	2	592	704	481	600	0.34	30.4
tr|Q55559|Q55559_SYNY3	WP_138073880.1	32.143	56	36	1	380	433	40	95	0.77	28.9
sll0202	Q55694	glucose inhibited division protein		gidA	Cell division	Cellular Processes	Soluble proteins		70.8	0
BLAST Output	PCC 11901 Accession	Percentage Identity	Alignment Length	Mismatches	Gap Open	Synechocystis sp. PCC 6803 Start	Synechocystis sp. PCC 6803 End	PCC 11901 Start	PCC 11901 End	E-value	Bit Score
sp|Q55694|MNMG_SYNY3	WP_138072945.1	82.194	629	112	0	3	631	2	630	0.0	1099
sp|Q55694|MNMG_SYNY3	WP_065711238.1	36.792	106	65	2	318	422	293	397	2.49e-05	43.5
sp|Q55694|MNMG_SYNY3	WP_138071068.1	33.333	84	41	5	249	324	557	633	0.015	34.7
sp|Q55694|MNMG_SYNY3	WP_138072806.1	36.842	38	24	0	13	50	16	53	0.11	31.6
sp|Q55694|MNMG_SYNY3	WP_138071832.1	37.143	35	22	0	15	49	170	204	0.25	30.4
sp|Q55694|MNMG_SYNY3	WP_138071585.1	72.222	18	5	0	12	29	3	20	0.39	30.0
sp|Q55694|MNMG_SYNY3	WP_138072242.1	46.429	28	15	0	3	30	1	28	0.75	29.3
sll0204	Q55692	glucose inhibited division protein		gidA	Cell division	Cellular Processes	Soluble proteins		50.1	0
BLAST Output	PCC 11901 Accession	Percentage Identity	Alignment Length	Mismatches	Gap Open	Synechocystis sp. PCC 6803 Start	Synechocystis sp. PCC 6803 End	PCC 11901 Start	PCC 11901 End	E-value	Bit Score
sp|Q55692|TRMFO_SYNY3	WP_065711238.1	75.717	453	105	1	3	455	4	451	0.0	689
sp|Q55692|TRMFO_SYNY3	WP_138072945.1	29.825	114	70	3	292	400	317	425	1.36e-07	50.1
sp|Q55692|TRMFO_SYNY3	WP_138073313.1	28.972	107	65	3	332	427	212	318	0.63	28.9
sp|Q55692|TRMFO_SYNY3	WP_030007645.1	35.135	37	24	0	7	43	5	41	0.67	28.5
slr0072	Q55787	glucose inhibited division protein B	gidB	gidB	Cell division	Cellular Processes	Soluble proteins		28.8	0
BLAST Output	PCC 11901 Accession	Percentage Identity	Alignment Length	Mismatches	Gap Open	Synechocystis sp. PCC 6803 Start	Synechocystis sp. PCC 6803 End	PCC 11901 Start	PCC 11901 End	E-value	Bit Score
sp|Q55787|RSMG_SYNY3	WP_138072756.1	48.963	241	121	2	22	261	8	247	7.89e-80	238
sp|Q55787|RSMG_SYNY3	WP_065710250.1	26.400	125	71	4	95	205	63	180	0.12	29.6
sp|Q55787|RSMG_SYNY3	WP_138073490.1	28.814	118	73	5	82	194	27	138	0.17	29.3
sll0289	Q55900	septum site-determining protein MinD	minD	minD	Cell division (min)	Cellular Processes	PM		29	0
BLAST Output	PCC 11901 Accession	Percentage Identity	Alignment Length	Mismatches	Gap Open	Synechocystis sp. PCC 6803 Start	Synechocystis sp. PCC 6803 End	PCC 11901 Start	PCC 11901 End	E-value	Bit Score
sp|Q55900|MIND_SYNY3	WP_012306145.1	64.122	262	93	1	1	261	1	262	1.05e-115	329
sp|Q55900|MIND_SYNY3	WP_012306542.1	27.344	256	160	8	1	238	96	343	1.58e-13	66.2
sp|Q55900|MIND_SYNY3	WP_138073282.1	28.977	176	117	4	3	172	561	734	7.74e-10	55.5
sp|Q55900|MIND_SYNY3	WP_138071252.1	34.783	138	80	7	11	140	11	146	1.26e-09	53.9
sp|Q55900|MIND_SYNY3	WP_030007057.1	55.263	38	17	0	3	40	168	205	1.43e-07	48.5
sp|Q55900|MIND_SYNY3	WP_012306948.1	28.671	143	66	6	2	144	4	110	2.09e-06	43.9
sp|Q55900|MIND_SYNY3	WP_041443966.1	58.065	31	13	0	10	40	7	37	1.29e-05	42.0
sp|Q55900|MIND_SYNY3	WP_012307837.1	27.568	185	93	7	1	145	1	184	1.51e-05	42.0
sp|Q55900|MIND_SYNY3	WP_030008092.1	41.379	58	33	1	4	61	3	59	4.08e-04	37.0
sp|Q55900|MIND_SYNY3	WP_138070987.1	37.288	59	34	2	4	62	2	57	0.003	34.3
sp|Q55900|MIND_SYNY3	WP_138073638.1	44.737	38	20	1	3	40	2	38	0.003	35.0
sp|Q55900|MIND_SYNY3	WP_138071079.1	37.288	59	34	2	4	62	2	57	0.003	34.3
sp|Q55900|MIND_SYNY3	WP_138073352.1	25.197	127	90	3	5	126	102	228	0.059	31.2
sp|Q55900|MIND_SYNY3	WP_138073051.1	40.541	37	22	0	4	40	3	39	0.087	30.4
sp|Q55900|MIND_SYNY3	WP_030007136.1	33.333	51	34	0	4	54	6	56	0.28	28.5
sp|Q55900|MIND_SYNY3	WP_012305478.1	40.000	50	19	2	5	47	4	49	0.37	28.1
sp|Q55900|MIND_SYNY3	WP_138071587.1	48.387	31	15	1	10	39	143	173	0.37	28.5
sp|Q55900|MIND_SYNY3	WP_138073617.1	31.915	47	27	2	81	122	169	215	0.85	27.3
sp|Q55900|MIND_SYNY3	WP_062436859.1	45.833	24	13	0	1	24	1	24	0.87	26.9
sll0288	Q55901	septum site-determining protein MinC	minC	minC	Cell division (min)	Cellular Processes	Unknown		26.8	0
BLAST Output	PCC 11901 Accession	Percentage Identity	Alignment Length	Mismatches	Gap Open	Synechocystis sp. PCC 6803 Start	Synechocystis sp. PCC 6803 End	PCC 11901 Start	PCC 11901 End	E-value	Bit Score
sp|Q55901|MINC_SYNY3	WP_062432278.1	50.526	190	81	3	65	244	98	284	2.35e-57	181
sp|Q55901|MINC_SYNY3	WP_138071824.1	30.909	55	38	0	120	174	96	150	0.69	27.7
sll1633	P73456	cell division protein FtsZ	ftsZ	ftsZ	Cell division (min)	Cellular Processes	Unknown		44.7	0
BLAST Output	PCC 11901 Accession	Percentage Identity	Alignment Length	Mismatches	Gap Open	Synechocystis sp. PCC 6803 Start	Synechocystis sp. PCC 6803 End	PCC 11901 Start	PCC 11901 End	E-value	Bit Score
sp|P73456|FTSZ_SYNY3	WP_030006808.1	67.700	387	93	3	61	425	33	409	3.08e-162	460
ssl0546	Q55899	septum site-determining protein MinE	minE	minE, ssl0546, mineE	Cell division (min)	Cellular Processes	Unknown		11.2	0
BLAST Output	PCC 11901 Accession	Percentage Identity	Alignment Length	Mismatches	Gap Open	Synechocystis sp. PCC 6803 Start	Synechocystis sp. PCC 6803 End	PCC 11901 Start	PCC 11901 End	E-value	Bit Score
sp|Q55899|MINE_SYNY3	WP_012306146.1	63.953	86	31	0	1	86	1	86	4.91e-36	114
sp|Q55899|MINE_SYNY3	WP_138073201.1	35.294	34	22	0	29	62	299	332	0.075	27.7
sp|Q55899|MINE_SYNY3	WP_012306580.1	41.667	24	14	0	35	58	22	45	0.20	26.6
slr1267	P74180	cell division protein FtsW	ftsW	mrdB, rodA, ftsW	FtsH proteins	Cellular Processes
BLAST Output	PCC 11901 Accession	Percentage Identity	Alignment Length	Mismatches	Gap Open	Synechocystis sp. PCC 6803 Start	Synechocystis sp. PCC 6803 End	PCC 11901 Start	PCC 11901 End	E-value	Bit Score
sp|P74180|FTSW_SYNY3	WP_065716284.1	51.538	390	186	2	1	388	1	389	1.05e-92	281
sp|P74180|FTSW_SYNY3	WP_181445666.1	32.177	317	163	8	110	377	106	419	5.51e-36	132
sp|P74180|FTSW_SYNY3	WP_168191121.1	23.387	124	89	3	194	313	62	183	0.76	28.5
sp|P74180|FTSW_SYNY3	WP_138073806.1	34.615	52	31	2	259	309	272	321	1.00	27.7
Heat shock and chaperonin proteins
sll0897	Q55505	DnaJ protein, heat shock protein 40, molecular chaperone	dnaJ	dnaJ, dnaJ1, dnaJ4	Chaperones	Cellular Processes	PM		40.8	0
BLAST Output	PCC 11901 Accession	Percentage Identity	Alignment Length	Mismatches	Gap Open	Synechocystis sp. PCC 6803 Start	Synechocystis sp. PCC 6803 End	PCC 11901 Start	PCC 11901 End	E-value	Bit Score
sp|Q55505|DNAJ1_SYNY3	WP_030005933.1	73.404	376	100	0	1	376	1	376	1.51e-178	498
sp|Q55505|DNAJ1_SYNY3	WP_138073517.1	41.317	167	69	5	4	143	8	172	4.49e-29	111
sp|Q55505|DNAJ1_SYNY3	WP_138073517.1	30.890	191	122	5	171	354	121	308	1.79e-19	84.7
sp|Q55505|DNAJ1_SYNY3	WP_030006610.1	33.688	282	136	12	4	247	6	274	7.77e-25	99.8
sp|Q55505|DNAJ1_SYNY3	WP_030006610.1	32.877	146	90	2	214	359	167	304	1.28e-19	85.1
sp|Q55505|DNAJ1_SYNY3	WP_138071518.1	47.143	70	30	1	4	66	2	71	9.21e-14	68.9
sp|Q55505|DNAJ1_SYNY3	WP_099240660.1	40.964	83	45	3	4	82	5	87	1.06e-10	57.8
sp|Q55505|DNAJ1_SYNY3	WP_062432325.1	42.188	64	35	1	4	65	24	87	2.07e-10	55.5
sp|Q55505|DNAJ1_SYNY3	WP_138071626.1	52.830	53	24	1	6	57	7	59	2.12e-10	56.2
sp|Q55505|DNAJ1_SYNY3	WP_065715992.1	31.884	69	40	1	3	64	15	83	7.76e-06	43.5
sp|Q55505|DNAJ1_SYNY3	WP_138072307.1	33.846	65	43	0	1	65	3	67	0.001	37.4
sp|Q55505|DNAJ1_SYNY3	WP_138072941.1	27.586	58	35	1	6	63	7	57	0.34	28.9
sp|Q55505|DNAJ1_SYNY3	WP_138072394.1	26.923	52	38	0	18	69	208	259	0.34	29.3
sp|Q55505|DNAJ1_SYNY3	WP_138073802.1	26.389	72	47	1	20	85	210	281	0.38	29.3
sp|Q55505|DNAJ1_SYNY3	WP_138071103.1	31.579	57	38	1	36	91	297	353	0.93	27.7
sll0057	Q59978	heat shock protein GrpE	grpE	grpE, greP	Chaperones	Cellular Processes	Soluble proteins		27.6	0
BLAST Output	PCC 11901 Accession	Percentage Identity	Alignment Length	Mismatches	Gap Open	Synechocystis sp. PCC 6803 Start	Synechocystis sp. PCC 6803 End	PCC 11901 Start	PCC 11901 End	E-value	Bit Score
sp|Q59978|GRPE_SYNY3	WP_138072699.1	61.905	168	64	0	69	236	71	238	3.08e-70	213
sp|Q59978|GRPE_SYNY3	WP_138072627.1	25.758	66	41	1	155	212	235	300	0.16	29.6
sp|Q59978|GRPE_SYNY3	WP_138072572.1	29.630	54	34	2	193	242	194	247	0.71	27.3
sll0058	Q55154	DnaK protein 1, heat shock protein 70, molecular chaperone	dnaK1	dnaK1, dnaK, dnaK4	Chaperones	Cellular Processes	Soluble proteins		75.1	0
BLAST Output	PCC 11901 Accession	Percentage Identity	Alignment Length	Mismatches	Gap Open	Synechocystis sp. PCC 6803 Start	Synechocystis sp. PCC 6803 End	PCC 11901 Start	PCC 11901 End	E-value	Bit Score
sp|Q55154|DNAK1_SYNY3	WP_030005934.1	72.093	602	168	0	1	602	1	602	0.0	874
sp|Q55154|DNAK1_SYNY3	WP_138071398.1	59.150	612	240	5	1	608	1	606	0.0	710
sp|Q55154|DNAK1_SYNY3	WP_012307760.1	58.834	549	222	3	1	547	1	547	0.0	654
sp|Q55154|DNAK1_SYNY3	WP_138072452.1	27.857	420	232	17	5	385	3	390	7.22e-21	93.2
sp|Q55154|DNAK1_SYNY3	WP_030008138.1	25.000	328	165	12	5	309	1	270	2.25e-10	59.3
sll0170	P22358	DnaK protein 2, heat shock protein 70, molecular chaperone	dnaK2	dnak2, dnaK	Chaperones	Cellular Processes	Soluble proteins		67.6	0
BLAST Output	PCC 11901 Accession	Percentage Identity	Alignment Length	Mismatches	Gap Open	Synechocystis sp. PCC 6803 Start	Synechocystis sp. PCC 6803 End	PCC 11901 Start	PCC 11901 End	E-value	Bit Score
sp|P22358|DNAK2_SYNY3	WP_138071398.1	85.202	642	84	2	1	633	1	640	0.0	1092
sp|P22358|DNAK2_SYNY3	WP_012307760.1	62.583	604	222	1	1	600	1	604	0.0	787
sp|P22358|DNAK2_SYNY3	WP_030005934.1	59.083	611	234	7	1	602	1	604	0.0	674
sp|P22358|DNAK2_SYNY3	WP_138072452.1	28.467	274	144	11	132	370	121	377	4.75e-12	65.1
sp|P22358|DNAK2_SYNY3	WP_030008138.1	26.407	231	125	8	5	235	1	186	1.46e-09	56.6
sp|P22358|DNAK2_SYNY3	WP_065711922.1	35.000	40	26	0	31	70	566	605	0.27	30.4
sll0416	P22034	60 kDa chaperonin 2, GroEL2, molecular chaperone	groEL-2	groEL2, cpn60-2, groEL-2, cpn60, groEL, csp60	Chaperones	Cellular Processes	Soluble proteins		57.7	0
BLAST Output	PCC 11901 Accession	Percentage Identity	Alignment Length	Mismatches	Gap Open	Synechocystis sp. PCC 6803 Start	Synechocystis sp. PCC 6803 End	PCC 11901 Start	PCC 11901 End	E-value	Bit Score
sp|P22034|CH602_SYNY3	WP_012305785.1	75.373	536	129	2	1	536	1	533	0.0	798
sp|P22034|CH602_SYNY3	WP_030006933.1	63.100	542	192	3	1	537	1	539	0.0	669
sp|P22034|CH602_SYNY3	WP_138071426.1	26.804	97	65	2	119	214	21	112	0.20	30.8
sll0430	P74702	HtpG, heat shock protein 90, molecular chaperone	htpG	htpG	Chaperones	Cellular Processes	Soluble proteins		75	0
BLAST Output	PCC 11901 Accession	Percentage Identity	Alignment Length	Mismatches	Gap Open	Synechocystis sp. PCC 6803 Start	Synechocystis sp. PCC 6803 End	PCC 11901 Start	PCC 11901 End	E-value	Bit Score
tr|P74702|P74702_SYNY3	WP_138073505.1	75.836	658	158	1	1	658	1	657	0.0	1065
tr|P74702|P74702_SYNY3	WP_138071218.1	42.857	28	16	0	622	649	220	247	0.93	28.9
sll1514	P72977	16.6 kDa small heat shock protein, molecular chaperone	hspA	hspA, hsp17, hsp1, hsp16.6, sll1514	Chaperones	Cellular Processes	Soluble proteins		16.6	0
BLAST Output	PCC 11901 Accession	Percentage Identity	Alignment Length	Mismatches	Gap Open	Synechocystis sp. PCC 6803 Start	Synechocystis sp. PCC 6803 End	PCC 11901 Start	PCC 11901 End	E-value	Bit Score
tr|P72977|P72977_SYNY3	WP_030005901.1	39.041	146	85	2	1	145	1	143	4.48e-30	103
tr|P72977|P72977_SYNY3	WP_138071041.1	41.667	36	20	1	56	91	49	83	0.21	27.7
slr0086	Q55807	similar to DnaK protein		dnaK1	Chaperones	Cellular Processes	Soluble proteins		59.1	0
BLAST Output	PCC 11901 Accession	Percentage Identity	Alignment Length	Mismatches	Gap Open	Synechocystis sp. PCC 6803 Start	Synechocystis sp. PCC 6803 End	PCC 11901 Start	PCC 11901 End	E-value	Bit Score
tr|Q55807|Q55807_SYNY3	WP_138072452.1	54.120	534	240	4	1	530	1	533	0.0	551
tr|Q55807|Q55807_SYNY3	WP_030005934.1	29.600	250	127	7	130	361	138	356	4.41e-20	90.1
tr|Q55807|Q55807_SYNY3	WP_012307760.1	27.368	285	153	10	112	374	118	370	4.17e-18	84.3
tr|Q55807|Q55807_SYNY3	WP_138071398.1	27.083	288	164	10	103	374	113	370	6.52e-17	80.1
tr|Q55807|Q55807_SYNY3	WP_030008138.1	33.929	56	35	1	141	194	107	162	7.32e-05	41.2
tr|Q55807|Q55807_SYNY3	WP_138072363.1	24.545	110	67	3	333	441	24	118	0.19	30.0
slr2075	Q05971	10kD chaperonin	groES	groES, slr2075	Chaperones	Cellular Processes	Soluble proteins		10.9	0
BLAST Output	PCC 11901 Accession	Percentage Identity	Alignment Length	Mismatches	Gap Open	Synechocystis sp. PCC 6803 Start	Synechocystis sp. PCC 6803 End	PCC 11901 Start	PCC 11901 End	E-value	Bit Score
sp|Q05971|CH10_SYNY3	WP_012308053.1	87.379	103	13	0	1	103	1	103	9.65e-61	177
sp|Q05971|CH10_SYNY3	WP_138073012.1	38.235	34	21	0	42	75	93	126	0.52	25.8
sp|Q05971|CH10_SYNY3	WP_012307760.1	38.710	31	19	0	60	90	197	227	0.68	25.4
slr2076	Q05972	60kD chaperonin	groEL1	groEL1, cpn60-1, groEL, groEL-1, slr2076	Chaperones	Cellular Processes	Soluble proteins		57.6	0
BLAST Output	PCC 11901 Accession	Percentage Identity	Alignment Length	Mismatches	Gap Open	Synechocystis sp. PCC 6803 Start	Synechocystis sp. PCC 6803 End	PCC 11901 Start	PCC 11901 End	E-value	Bit Score
sp|Q05972|CH601_SYNY3	WP_030006933.1	87.985	541	65	0	1	541	1	541	0.0	954
sp|Q05972|CH601_SYNY3	WP_012305785.1	66.041	533	178	3	1	532	1	531	0.0	703
sp|Q05972|CH601_SYNY3	WP_138072814.1	22.388	134	79	5	158	290	73	182	0.043	32.3
sp|Q05972|CH601_SYNY3	WP_030007153.1	31.148	61	38	1	346	406	13	69	0.58	27.7
sll1384	P74157	similar to DnaJ protein		dnaJ	Chaperones	Cellular Processes	Unknown		34.5	0
BLAST Output	PCC 11901 Accession	Percentage Identity	Alignment Length	Mismatches	Gap Open	Synechocystis sp. PCC 6803 Start	Synechocystis sp. PCC 6803 End	PCC 11901 Start	PCC 11901 End	E-value	Bit Score
tr|P74157|P74157_SYNY3	WP_065715992.1	36.721	305	168	6	3	298	2	290	8.70e-57	182
tr|P74157|P74157_SYNY3	WP_138073517.1	33.803	71	41	1	14	84	5	69	1.56e-06	45.4
tr|P74157|P74157_SYNY3	WP_030006610.1	30.986	71	43	1	14	84	3	67	2.16e-06	45.1
tr|P74157|P74157_SYNY3	WP_030005933.1	35.294	68	37	1	17	84	4	64	4.84e-06	43.9
tr|P74157|P74157_SYNY3	WP_065711483.1	29.808	104	71	1	170	273	24	125	9.90e-06	42.7
tr|P74157|P74157_SYNY3	WP_065711483.1	32.759	58	37	1	222	277	108	165	0.65	27.7
tr|P74157|P74157_SYNY3	WP_062432325.1	35.211	71	41	1	18	88	25	90	5.72e-05	39.3
tr|P74157|P74157_SYNY3	WP_138071518.1	31.579	76	52	0	16	91	1	76	6.22e-05	40.8
tr|P74157|P74157_SYNY3	WP_099240660.1	23.932	117	80	4	17	133	5	112	1.75e-04	38.5
tr|P74157|P74157_SYNY3	WP_138073771.1	26.744	86	59	1	218	299	628	713	0.001	36.6
tr|P74157|P74157_SYNY3	WP_138073771.1	34.545	55	36	0	219	273	493	547	0.21	29.6
tr|P74157|P74157_SYNY3	WP_138071626.1	29.231	65	36	2	14	76	2	58	0.002	35.0
tr|P74157|P74157_SYNY3	WP_138071626.1	24.348	115	72	4	185	284	62	176	0.020	32.0
tr|P74157|P74157_SYNY3	WP_138073582.1	30.357	56	39	0	218	273	72	127	0.21	29.3
tr|P74157|P74157_SYNY3	WP_138072307.1	28.788	66	40	1	16	81	5	63	0.34	28.9
tr|P74157|P74157_SYNY3	WP_138071559.1	24.138	58	44	0	221	278	93	150	0.58	28.1
tr|P74157|P74157_SYNY3	WP_062434815.1	30.189	53	37	0	220	272	113	165	0.62	27.7
tr|P74157|P74157_SYNY3	WP_138072398.1	31.373	51	35	0	225	275	285	335	0.88	27.7
tr|P74157|P74157_SYNY3	WP_138073528.1	32.075	53	35	1	137	188	19	71	0.91	26.9
sll1666	P72803	DnaJ-like protein		dnaJ, dnaJ2, dnaJ3, sll1666	Chaperones	Cellular Processes	Unknown		17.4	1
BLAST Output	PCC 11901 Accession	Percentage Identity	Alignment Length	Mismatches	Gap Open	Synechocystis sp. PCC 6803 Start	Synechocystis sp. PCC 6803 End	PCC 11901 Start	PCC 11901 End	E-value	Bit Score
tr|P72803|P72803_SYNY3	WP_062432325.1	54.777	157	62	3	7	161	5	154	7.99e-52	160
tr|P72803|P72803_SYNY3	WP_138073517.1	40.278	72	41	2	16	87	1	70	9.67e-12	58.5
tr|P72803|P72803_SYNY3	WP_030006610.1	46.875	64	33	1	24	87	6	68	3.23e-11	57.0
tr|P72803|P72803_SYNY3	WP_099240660.1	40.000	65	39	0	24	88	5	69	2.96e-10	53.9
tr|P72803|P72803_SYNY3	WP_030005933.1	38.235	68	38	2	21	87	1	65	3.46e-09	51.2
tr|P72803|P72803_SYNY3	WP_138071518.1	39.726	73	37	3	24	89	2	74	2.94e-08	48.9
tr|P72803|P72803_SYNY3	WP_065715992.1	35.443	79	45	3	15	88	8	85	8.13e-05	38.5
tr|P72803|P72803_SYNY3	WP_138071626.1	35.088	57	36	1	26	82	7	62	0.002	33.9
sll1932	P73098	DnaK protein	dnaK	dnaK, dnaK3	Chaperones	Cellular Processes	Unknown		86	0
BLAST Output	PCC 11901 Accession	Percentage Identity	Alignment Length	Mismatches	Gap Open	Synechocystis sp. PCC 6803 Start	Synechocystis sp. PCC 6803 End	PCC 11901 Start	PCC 11901 End	E-value	Bit Score
sp|P73098|DNAK3_SYNY3	WP_012307760.1	68.625	800	174	10	1	771	1	752	0.0	1061
sp|P73098|DNAK3_SYNY3	WP_138071398.1	62.748	604	221	1	1	604	1	600	0.0	788
sp|P73098|DNAK3_SYNY3	WP_030005934.1	58.439	551	221	4	1	547	1	547	0.0	616
sp|P73098|DNAK3_SYNY3	WP_138072452.1	29.167	288	152	12	132	385	121	390	2.11e-12	66.6
sp|P73098|DNAK3_SYNY3	WP_030008138.1	26.068	234	122	8	5	235	1	186	3.04e-09	55.8
sp|P73098|DNAK3_SYNY3	WP_012305691.1	40.000	35	21	0	272	306	35	69	0.14	31.2
sp|P73098|DNAK3_SYNY3	WP_138072414.1	30.233	43	30	0	654	696	28	70	0.22	31.2
sll1933	P73097	DnaJ protein, heat shock protein 40, molecular chaperone	dnaJ	dnaJ, dnaJ3, dnaJ1	Chaperones	Cellular Processes	Unknown		34.7	0
BLAST Output	PCC 11901 Accession	Percentage Identity	Alignment Length	Mismatches	Gap Open	Synechocystis sp. PCC 6803 Start	Synechocystis sp. PCC 6803 End	PCC 11901 Start	PCC 11901 End	E-value	Bit Score
sp|P73097|DNAJ2_SYNY3	WP_030006610.1	58.438	320	114	3	1	307	1	314	1.41e-127	363
sp|P73097|DNAJ2_SYNY3	WP_138073517.1	38.110	328	161	8	5	304	7	320	2.63e-69	215
sp|P73097|DNAJ2_SYNY3	WP_030005933.1	34.043	141	85	2	160	292	214	354	1.87e-19	84.3
sp|P73097|DNAJ2_SYNY3	WP_030005933.1	55.556	63	27	1	6	68	4	65	2.17e-16	75.5
sp|P73097|DNAJ2_SYNY3	WP_099240660.1	36.170	94	48	2	6	98	5	87	1.31e-13	65.5
sp|P73097|DNAJ2_SYNY3	WP_138071626.1	50.943	53	26	0	8	60	7	59	3.32e-12	60.8
sp|P73097|DNAJ2_SYNY3	WP_138071518.1	40.541	74	38	2	6	73	2	75	1.43e-09	55.1
sp|P73097|DNAJ2_SYNY3	WP_062432325.1	33.784	74	47	2	4	75	22	95	1.79e-08	49.7
sp|P73097|DNAJ2_SYNY3	WP_065715992.1	28.571	63	39	2	3	59	13	75	0.004	35.0
sp|P73097|DNAJ2_SYNY3	WP_138072941.1	29.762	84	45	3	5	87	4	74	0.006	33.9
sp|P73097|DNAJ2_SYNY3	WP_012307595.1	43.333	30	17	0	3	32	68	97	0.22	28.1
sp|P73097|DNAJ2_SYNY3	WP_138072943.1	26.230	122	74	5	134	244	145	261	0.45	28.5
sp|P73097|DNAJ2_SYNY3	WP_138072582.1	40.625	32	19	0	249	280	754	785	0.92	27.7
sll1988	P73910	33 kDa chaperonin	hsp33		Chaperones	Cellular Processes	Unknown		32.2	0
BLAST Output	PCC 11901 Accession	Percentage Identity	Alignment Length	Mismatches	Gap Open	Synechocystis sp. PCC 6803 Start	Synechocystis sp. PCC 6803 End	PCC 11901 Start	PCC 11901 End	E-value	Bit Score
sp|P73910|HSLO_SYNY3	WP_138073080.1	76.949	295	67	1	1	295	1	294	1.23e-169	469
slr0093	P50027	DnaJ protein, heat shock protein 40, molecular chaperone	dnaJ	dnaJ, dnaJ4, dnaJ2	Chaperones	Cellular Processes	Unknown		36.3	0
BLAST Output	PCC 11901 Accession	Percentage Identity	Alignment Length	Mismatches	Gap Open	Synechocystis sp. PCC 6803 Start	Synechocystis sp. PCC 6803 End	PCC 11901 Start	PCC 11901 End	E-value	Bit Score
sp|P50027|DNAJH_SYNY3	WP_138073517.1	61.791	335	110	8	1	328	1	324	2.73e-142	402
sp|P50027|DNAJH_SYNY3	WP_030006610.1	40.419	334	170	9	4	328	2	315	5.37e-75	230
sp|P50027|DNAJH_SYNY3	WP_030005933.1	34.815	135	83	3	182	312	221	354	6.11e-17	77.4
sp|P50027|DNAJH_SYNY3	WP_138071518.1	50.000	70	29	2	8	71	2	71	1.04e-15	74.3
sp|P50027|DNAJH_SYNY3	WP_062432325.1	41.096	73	39	2	7	75	23	95	4.88e-12	60.1
sp|P50027|DNAJH_SYNY3	WP_099240660.1	37.500	64	39	1	8	70	5	68	2.49e-10	56.2
sp|P50027|DNAJH_SYNY3	WP_138071626.1	38.710	62	38	0	4	65	1	62	1.89e-09	53.1
sp|P50027|DNAJH_SYNY3	WP_138072307.1	37.500	64	39	1	8	71	6	68	7.57e-05	40.8
sp|P50027|DNAJH_SYNY3	WP_065715992.1	25.714	70	46	1	6	69	14	83	0.016	33.1
sp|P50027|DNAJH_SYNY3	WP_030006045.1	24.211	95	61	3	15	101	19	110	0.018	32.3
sp|P50027|DNAJH_SYNY3	WP_138072941.1	29.412	85	43	3	10	85	7	83	0.12	30.0
Receptors and taxis proteins
sll0041	Q55445	phytochrome-like photoreceptor protein for positive phototaxis; homologous to methyl-accepting chemotaxis protein	pixJ1, pisJ1, taxD1	pixJ1, pisJ1, taxD1, tsr, cheD, SypixJ1, pixJ	Chemotaxis	Cellular Processes	PM		108.3	0
BLAST Output	PCC 11901 Accession	Percentage Identity	Alignment Length	Mismatches	Gap Open	Synechocystis sp. PCC 6803 Start	Synechocystis sp. PCC 6803 End	PCC 11901 Start	PCC 11901 End	E-value	Bit Score
sp|Q55445|Y041_SYNY3	WP_138072005.1	38.440	705	405	10	315	1000	797	1491	7.60e-130	425
sp|Q55445|Y041_SYNY3	WP_138072005.1	28.718	390	267	5	290	670	426	813	1.38e-46	178
sp|Q55445|Y041_SYNY3	WP_138072005.1	28.276	290	195	3	396	680	361	642	3.72e-36	145
sp|Q55445|Y041_SYNY3	WP_138072005.1	25.735	408	270	6	284	671	75	469	3.42e-32	132
sp|Q55445|Y041_SYNY3	WP_138072005.1	31.621	253	154	6	464	704	93	338	3.43e-25	109
sp|Q55445|Y041_SYNY3	WP_138073212.1	45.930	344	184	1	657	1000	556	897	4.50e-80	276
sp|Q55445|Y041_SYNY3	WP_138071638.1	39.701	335	202	0	666	1000	680	1014	1.66e-65	236
sp|Q55445|Y041_SYNY3	WP_012306480.1	34.483	145	94	1	497	641	6	149	2.98e-24	97.1
sp|Q55445|Y041_SYNY3	WP_012306480.1	25.581	129	90	3	346	469	22	149	9.48e-06	43.5
sp|Q55445|Y041_SYNY3	WP_138072695.1	29.032	217	110	5	471	656	129	332	9.41e-23	100
sp|Q55445|Y041_SYNY3	WP_138072695.1	28.723	94	61	1	408	495	256	349	0.002	38.5
sp|Q55445|Y041_SYNY3	WP_099238081.1	30.049	203	128	5	488	680	171	369	2.11e-16	80.5
sp|Q55445|Y041_SYNY3	WP_099238081.1	27.523	218	117	8	294	489	155	353	6.27e-07	49.7
sp|Q55445|Y041_SYNY3	WP_138072949.1	25.837	209	146	2	461	660	423	631	5.78e-14	72.8
sp|Q55445|Y041_SYNY3	WP_138072949.1	30.508	59	37	1	446	500	589	647	0.51	30.4
sp|Q55445|Y041_SYNY3	WP_138073219.1	40.426	47	25	2	606	650	345	390	1.80e-04	41.6
sp|Q55445|Y041_SYNY3	WP_138072400.1	32.813	64	43	0	431	494	230	293	0.002	38.5
sp|Q55445|Y041_SYNY3	WP_138072400.1	32.075	53	36	0	603	655	230	282	0.012	35.8
sll1294	P73173	methyl-accepting chemotaxis protein		taxD2, sll1294	Chemotaxis	Cellular Processes	PM		103.1	2
BLAST Output	PCC 11901 Accession	Percentage Identity	Alignment Length	Mismatches	Gap Open	Synechocystis sp. PCC 6803 Start	Synechocystis sp. PCC 6803 End	PCC 11901 Start	PCC 11901 End	E-value	Bit Score
tr|P73173|P73173_SYNY3	WP_138071638.1	46.146	999	486	13	2	953	21	1014	0.0	712
tr|P73173|P73173_SYNY3	WP_138073212.1	42.056	428	233	3	534	953	477	897	3.06e-85	290
tr|P73173|P73173_SYNY3	WP_138072005.1	40.498	321	190	1	633	953	1172	1491	1.09e-49	188
tr|P73173|P73173_SYNY3	WP_012307019.1	30.682	88	56	2	552	638	214	297	0.001	38.9
tr|P73173|P73173_SYNY3	WP_041443893.1	25.781	128	79	4	617	740	151	266	0.033	33.9
sll0040	Q55446	positive phototaxis protein, homologous to chemotaxis protein CheW	pixI, pisI	pixI, pisI, taxW1, taxW	Chemotaxis	Cellular Processes	Soluble proteins		16.2	0
BLAST Output	PCC 11901 Accession	Percentage Identity	Alignment Length	Mismatches	Gap Open	Synechocystis sp. PCC 6803 Start	Synechocystis sp. PCC 6803 End	PCC 11901 Start	PCC 11901 End	E-value	Bit Score
tr|Q55446|Q55446_SYNY3	WP_012306992.1	32.867	143	72	5	13	153	32	152	4.15e-14	63.9
tr|Q55446|Q55446_SYNY3	WP_030006792.1	23.030	165	110	1	11	175	14	161	2.56e-10	53.1
tr|Q55446|Q55446_SYNY3	WP_138071640.1	31.081	74	51	0	21	94	26	99	3.53e-08	47.4
tr|Q55446|Q55446_SYNY3	WP_138071367.1	28.947	76	43	4	91	157	1451	1524	0.45	27.7
tr|Q55446|Q55446_SYNY3	WP_012306534.1	25.000	112	70	5	60	165	89	192	0.73	26.6
sll0042	Q55444	methyl-accepting chemotaxis protein for positive phototaxis	pixJ2, pisJ2	pixJ2, pisJ2, tar, cheM, taxD', sll0042	Chemotaxis	Cellular Processes	Unknown		17.7	0
BLAST Output	PCC 11901 Accession	Percentage Identity	Alignment Length	Mismatches	Gap Open	Synechocystis sp. PCC 6803 Start	Synechocystis sp. PCC 6803 End	PCC 11901 Start	PCC 11901 End	E-value	Bit Score
tr|Q55444|Q55444_SYNY3	WP_138073212.1	45.631	103	56	0	36	138	705	807	5.16e-24	94.0
tr|Q55444|Q55444_SYNY3	WP_138071638.1	41.525	118	66	1	24	138	807	924	3.89e-21	85.9
tr|Q55444|Q55444_SYNY3	WP_138072005.1	50.000	82	40	1	29	110	1293	1373	3.41e-18	77.4
tr|Q55444|Q55444_SYNY3	WP_138073395.1	29.412	102	63	3	14	108	74	173	0.019	30.8
slr1043	P73007	similar to chemotaxis protein CheW	cheW	pilI, taxW3, taxW	Chemotaxis	Cellular Processes	Unknown		20.7	0
BLAST Output	PCC 11901 Accession	Percentage Identity	Alignment Length	Mismatches	Gap Open	Synechocystis sp. PCC 6803 Start	Synechocystis sp. PCC 6803 End	PCC 11901 Start	PCC 11901 End	E-value	Bit Score
tr|P73007|P73007_SYNY3	WP_012306992.1	62.500	168	57	3	21	187	16	178	6.94e-67	199
tr|P73007|P73007_SYNY3	WP_138071640.1	37.500	48	30	0	43	90	24	71	4.31e-05	38.9
tr|P73007|P73007_SYNY3	WP_030006792.1	23.308	133	97	3	49	177	28	159	7.10e-04	35.0
tr|P73007|P73007_SYNY3	WP_065709960.1	25.000	64	44	1	100	163	134	193	0.056	30.0
FtsH proteins
slr1390	P73179	cell division protein FtsH	ftsH	ftsH, ftsH1, ftsH2, slr1390	FtsH proteins	Cellular Processes	PM		69.3	2
BLAST Output	PCC 11901 Accession	Percentage Identity	Alignment Length	Mismatches	Gap Open	Synechocystis sp. PCC 6803 Start	Synechocystis sp. PCC 6803 End	PCC 11901 Start	PCC 11901 End	E-value	Bit Score
sp|P73179|FTSH1_SYNY3	WP_138072301.1	66.897	580	185	3	79	653	38	615	0.0	783
sp|P73179|FTSH1_SYNY3	WP_138073103.1	67.474	578	184	3	74	650	49	623	0.0	778
sp|P73179|FTSH1_SYNY3	WP_012305681.1	55.385	585	248	7	72	650	28	605	0.0	616
sp|P73179|FTSH1_SYNY3	WP_065710337.1	49.398	581	274	12	82	650	41	613	1.45e-174	508
sp|P73179|FTSH1_SYNY3	WP_138073054.1	33.333	222	132	5	212	427	229	440	4.22e-22	96.7
sp|P73179|FTSH1_SYNY3	WP_138073107.1	29.752	242	159	7	211	448	225	459	9.55e-21	92.4
sp|P73179|FTSH1_SYNY3	WP_030006813.1	31.416	226	135	9	244	464	283	493	3.38e-19	87.8
sp|P73179|FTSH1_SYNY3	WP_012307148.1	36.250	80	41	3	247	318	134	211	8.69e-05	42.0
sp|P73179|FTSH1_SYNY3	WP_138071935.1	29.060	117	63	7	463	568	66	173	0.030	33.1
sp|P73179|FTSH1_SYNY3	WP_138073867.1	22.302	139	78	5	233	352	209	336	0.13	32.0
sp|P73179|FTSH1_SYNY3	WP_012306671.1	39.286	28	17	0	247	274	7	34	0.21	30.4
sp|P73179|FTSH1_SYNY3	WP_138072402.1	28.058	139	67	9	203	327	180	299	0.23	31.2
sp|P73179|FTSH1_SYNY3	WP_138073220.1	30.769	78	32	3	247	317	78	140	0.35	30.0
sp|P73179|FTSH1_SYNY3	WP_138072317.1	50.000	20	10	0	247	266	217	236	0.56	29.6
sp|P73179|FTSH1_SYNY3	WP_138073572.1	25.301	83	54	2	551	625	97	179	0.70	28.9
sll1463	P73437	cell division protein FtsH	ftsH	ftsH, ftsH4, sll1463	FtsH proteins	Cellular Processes	TM		68.2	2
BLAST Output	PCC 11901 Accession	Percentage Identity	Alignment Length	Mismatches	Gap Open	Synechocystis sp. PCC 6803 Start	Synechocystis sp. PCC 6803 End	PCC 11901 Start	PCC 11901 End	E-value	Bit Score
sp|P73437|FTSH4_SYNY3	WP_065710337.1	77.955	626	128	4	1	623	1	619	0.0	968
sp|P73437|FTSH4_SYNY3	WP_012305681.1	51.713	613	267	12	19	617	8	605	0.0	563
sp|P73437|FTSH4_SYNY3	WP_138072301.1	46.825	630	302	13	6	619	2	614	0.0	534
sp|P73437|FTSH4_SYNY3	WP_138073103.1	45.570	632	305	15	4	619	17	625	1.46e-173	505
sp|P73437|FTSH4_SYNY3	WP_138073054.1	29.661	236	135	4	195	417	247	464	4.95e-23	99.4
sp|P73437|FTSH4_SYNY3	WP_138073107.1	31.373	255	161	8	163	414	217	460	8.63e-21	92.4
sp|P73437|FTSH4_SYNY3	WP_030006813.1	31.492	181	115	5	207	385	283	456	4.81e-16	77.8
sp|P73437|FTSH4_SYNY3	WP_012307148.1	33.750	80	43	3	209	280	133	210	3.55e-04	39.7
sp|P73437|FTSH4_SYNY3	WP_138072402.1	27.888	251	133	14	211	432	212	443	0.001	38.1
sp|P73437|FTSH4_SYNY3	WP_138071830.1	32.394	71	41	3	161	228	296	362	0.018	34.3
sp|P73437|FTSH4_SYNY3	WP_062431746.1	27.885	104	60	4	202	291	196	298	0.14	31.6
sp|P73437|FTSH4_SYNY3	WP_138071325.1	40.351	57	23	2	176	228	576	625	0.50	29.6
sp|P73437|FTSH4_SYNY3	WP_138071325.1	27.219	169	96	10	202	355	196	352	0.76	29.3
sp|P73437|FTSH4_SYNY3	WP_138073220.1	31.944	72	39	2	210	280	78	140	0.67	29.3
sp|P73437|FTSH4_SYNY3	WP_138072317.1	55.000	20	9	0	210	229	217	236	0.97	28.9
slr0228	Q55700	cell division protein FtsH	ftsH	ftsH, ftsH2, slr0228	FtsH proteins	Cellular Processes	TM		68.5	2
BLAST Output	PCC 11901 Accession	Percentage Identity	Alignment Length	Mismatches	Gap Open	Synechocystis sp. PCC 6803 Start	Synechocystis sp. PCC 6803 End	PCC 11901 Start	PCC 11901 End	E-value	Bit Score
sp|Q55700|FTSH2_SYNY3	WP_138072301.1	83.917	628	100	1	1	627	1	628	0.0	1093
sp|Q55700|FTSH2_SYNY3	WP_138073103.1	62.839	627	198	9	2	613	19	625	0.0	756
sp|Q55700|FTSH2_SYNY3	WP_012305681.1	60.764	576	210	6	45	613	41	607	0.0	665
sp|Q55700|FTSH2_SYNY3	WP_065710337.1	47.276	624	291	14	6	611	10	613	1.21e-177	514
sp|Q55700|FTSH2_SYNY3	WP_138073107.1	30.973	226	141	7	172	393	225	439	5.25e-22	96.3
sp|Q55700|FTSH2_SYNY3	WP_138073054.1	32.018	228	135	6	172	391	228	443	2.11e-21	94.4
sp|Q55700|FTSH2_SYNY3	WP_030006813.1	30.357	224	140	7	205	425	283	493	7.88e-19	86.3
sp|Q55700|FTSH2_SYNY3	WP_012307148.1	29.487	156	84	7	143	279	63	211	1.77e-05	43.9
sp|Q55700|FTSH2_SYNY3	WP_138073867.1	21.569	153	90	5	194	327	209	350	0.18	31.2
sp|Q55700|FTSH2_SYNY3	WP_012306671.1	39.286	28	17	0	208	235	7	34	0.20	30.4
sp|Q55700|FTSH2_SYNY3	WP_138071935.1	27.350	117	65	7	424	529	66	173	0.20	30.4
sp|Q55700|FTSH2_SYNY3	WP_138073220.1	30.769	78	32	3	208	278	78	140	0.24	30.4
sp|Q55700|FTSH2_SYNY3	WP_138072402.1	28.723	94	49	6	209	288	212	301	0.44	30.0
sp|Q55700|FTSH2_SYNY3	WP_138072317.1	55.000	20	9	0	208	227	217	236	0.44	29.6
slr1604	P72991	cell division protein FtsH	ftsH	ftsH, ftsH3, ftsH4, slr1604	FtsH proteins	Cellular Processes	TM		67.2	2
BLAST Output	PCC 11901 Accession	Percentage Identity	Alignment Length	Mismatches	Gap Open	Synechocystis sp. PCC 6803 Start	Synechocystis sp. PCC 6803 End	PCC 11901 Start	PCC 11901 End	E-value	Bit Score
sp|P72991|FTSH3_SYNY3	WP_012305681.1	85.016	614	90	2	1	613	1	613	0.0	1030
sp|P72991|FTSH3_SYNY3	WP_138072301.1	58.958	614	232	10	8	606	5	613	0.0	681
sp|P72991|FTSH3_SYNY3	WP_138073103.1	55.574	610	253	8	7	605	21	623	0.0	651
sp|P72991|FTSH3_SYNY3	WP_065710337.1	50.891	617	280	14	3	605	6	613	0.0	545
sp|P72991|FTSH3_SYNY3	WP_138073054.1	32.735	223	141	5	183	402	248	464	3.72e-25	105
sp|P72991|FTSH3_SYNY3	WP_138073107.1	32.018	228	140	7	159	382	223	439	7.25e-24	102
sp|P72991|FTSH3_SYNY3	WP_030006813.1	33.158	190	115	5	194	381	283	462	4.81e-20	90.1
sp|P72991|FTSH3_SYNY3	WP_012307148.1	32.927	82	41	3	197	268	134	211	1.22e-04	41.2
sp|P72991|FTSH3_SYNY3	WP_138072317.1	42.857	35	20	0	182	216	202	236	0.054	32.7
sp|P72991|FTSH3_SYNY3	WP_138073220.1	36.111	72	36	3	197	267	78	140	0.12	31.6
sp|P72991|FTSH3_SYNY3	WP_138071935.1	27.119	118	68	7	413	522	66	173	0.18	30.4
sp|P72991|FTSH3_SYNY3	WP_012306671.1	39.286	28	17	0	197	224	7	34	0.20	30.0
sp|P72991|FTSH3_SYNY3	WP_138072402.1	27.660	94	50	5	198	277	212	301	0.33	30.4
sp|P72991|FTSH3_SYNY3	WP_138072402.1	26.364	110	64	4	175	267	596	705	0.42	30.0
sp|P72991|FTSH3_SYNY3	WP_138073867.1	21.324	136	78	4	199	316	226	350	0.82	29.3
sp|P72991|FTSH3_SYNY3	WP_138073640.1	27.619	105	68	4	477	574	420	523	0.84	28.9
sp|P72991|FTSH3_SYNY3	WP_138071325.1	28.866	97	50	6	198	277	205	299	0.95	28.9
Leader peptidases
sll0716	P72660	leader peptidase I (signal peptidase I)		lepB1, lepB	Leader peptidase	Cellular Processes	PM		22.2	1
BLAST Output	PCC 11901 Accession	Percentage Identity	Alignment Length	Mismatches	Gap Open	Synechocystis sp. PCC 6803 Start	Synechocystis sp. PCC 6803 End	PCC 11901 Start	PCC 11901 End	E-value	Bit Score
sp|P72660|LEP1_SYNY3	WP_138072776.1	57.386	176	75	0	7	182	14	189	2.06e-73	216
sp|P72660|LEP1_SYNY3	WP_138073797.1	52.542	177	79	2	8	184	25	196	1.69e-62	189
slr1377	P73157	leader peptidase I (signal peptidase I)		lepB, lepB2	Leader peptidase	Cellular Processes	Unknown		24.7	1
BLAST Output	PCC 11901 Accession	Percentage Identity	Alignment Length	Mismatches	Gap Open	Synechocystis sp. PCC 6803 Start	Synechocystis sp. PCC 6803 End	PCC 11901 Start	PCC 11901 End	E-value	Bit Score
sp|P73157|LEP2_SYNY3	WP_138073797.1	65.761	184	63	0	10	193	16	199	5.27e-93	268
sp|P73157|LEP2_SYNY3	WP_138072776.1	45.304	181	97	1	8	186	7	187	3.55e-51	161
Cryptochromes
sll1629	P77967	bacterial cryptochrome		phr, phrB, syn-cry, Ccry1	Light sensing	Cellular Processes	Unknown		52.9	0
BLAST Output	PCC 11901 Accession	Percentage Identity	Alignment Length	Mismatches	Gap Open	Synechocystis sp. PCC 6803 Start	Synechocystis sp. PCC 6803 End	PCC 11901 Start	PCC 11901 End	E-value	Bit Score
sp|P77967|CRYD_SYNY3	WP_138071720.1	55.123	488	206	2	7	487	5	486	0.0	554
sp|P77967|CRYD_SYNY3	WP_138071850.1	30.856	444	278	8	8	438	5	432	6.70e-64	211
sp|P77967|CRYD_SYNY3	WP_138073698.1	23.494	166	107	7	233	388	241	396	0.005	35.8
Pili proteins
sll1456	P73445	unknown protein		pilA3	Pili proteins	Cellular Processes	PM		33.5	0
BLAST Output	PCC 11901 Accession	Percentage Identity	Alignment Length	Mismatches	Gap Open	Synechocystis sp. PCC 6803 Start	Synechocystis sp. PCC 6803 End	PCC 11901 Start	PCC 11901 End	E-value	Bit Score
tr|P73445|P73445_SYNY3	WP_138073674.1	26.966	89	59	1	158	246	607	689	0.35	28.9
tr|P73445|P73445_SYNY3	WP_138073151.1	30.769	39	27	0	132	170	25	63	0.37	28.5
tr|P73445|P73445_SYNY3	WP_138072491.1	28.169	71	48	1	112	182	254	321	0.98	27.3
sll1533	P74349	twitching mobility protein	pilT2	pilT2, pilT, pilM	Pili proteins	Cellular Processes	PM		47.9	0
BLAST Output	PCC 11901 Accession	Percentage Identity	Alignment Length	Mismatches	Gap Open	Synechocystis sp. PCC 6803 Start	Synechocystis sp. PCC 6803 End	PCC 11901 Start	PCC 11901 End	E-value	Bit Score
tr|P74349|P74349_SYNY3	WP_138073788.1	74.930	355	89	0	73	427	93	447	0.0	569
tr|P74349|P74349_SYNY3	WP_012306326.1	40.294	340	193	3	80	411	5	342	7.40e-79	245
tr|P74349|P74349_SYNY3	WP_099237884.1	41.667	216	98	9	146	351	314	511	3.67e-29	116
tr|P74349|P74349_SYNY3	WP_138072468.1	44.000	50	20	3	177	219	1	49	0.048	32.0
tr|P74349|P74349_SYNY3	WP_138071587.1	23.423	111	80	1	202	307	139	249	0.056	32.0
tr|P74349|P74349_SYNY3	WP_138071460.1	34.211	38	25	0	194	231	4	41	0.076	31.6
tr|P74349|P74349_SYNY3	WP_138072424.1	39.535	43	24	1	177	219	2	42	0.38	29.3
tr|P74349|P74349_SYNY3	WP_138073901.1	32.787	61	34	2	173	226	359	419	0.80	28.5
tr|P74349|P74349_SYNY3	WP_012307853.1	35.484	31	20	0	193	223	37	67	0.84	28.1
sll1694	P73704	pilin polypeptide PilA1	pilA1	pilA1, pilA, hofG, hopG, sll1694	Pili proteins	Cellular Processes	PM		17.6	1
BLAST Output	PCC 11901 Accession	Percentage Identity	Alignment Length	Mismatches	Gap Open	Synechocystis sp. PCC 6803 Start	Synechocystis sp. PCC 6803 End	PCC 11901 Start	PCC 11901 End	E-value	Bit Score
tr|P73704|P73704_SYNY3	WP_138071861.1	54.118	85	34	2	8	87	22	106	3.20e-22	85.1
tr|P73704|P73704_SYNY3	WP_138071863.1	57.000	100	42	1	4	102	3	102	1.26e-20	81.3
tr|P73704|P73704_SYNY3	WP_138073343.1	38.710	62	37	1	9	69	2	63	3.87e-07	44.3
tr|P73704|P73704_SYNY3	WP_138073345.1	42.000	50	28	1	21	69	16	65	2.92e-05	38.9
tr|P73704|P73704_SYNY3	WP_138073344.1	30.986	71	47	2	5	74	8	77	6.78e-04	35.8
tr|P73704|P73704_SYNY3	WP_138072916.1	35.556	45	25	1	42	86	208	248	0.84	26.2
sll1695	P73703	pilin polypeptide PilA2	pilA2	pilA2, pilA, hofG, sll1695, pilA5	Pili proteins	Cellular Processes	PM		18.5	1
BLAST Output	PCC 11901 Accession	Percentage Identity	Alignment Length	Mismatches	Gap Open	Synechocystis sp. PCC 6803 Start	Synechocystis sp. PCC 6803 End	PCC 11901 Start	PCC 11901 End	E-value	Bit Score
tr|P73703|P73703_SYNY3	WP_138071861.1	50.000	60	30	0	22	81	39	98	1.58e-16	70.1
tr|P73703|P73703_SYNY3	WP_138071863.1	50.820	61	30	0	21	81	18	78	1.19e-06	43.1
tr|P73703|P73703_SYNY3	WP_138073343.1	23.077	104	74	3	18	115	7	110	9.67e-05	37.7
tr|P73703|P73703_SYNY3	WP_138073345.1	31.429	35	24	0	20	54	13	47	0.038	30.0
tr|P73703|P73703_SYNY3	WP_138073344.1	28.205	39	28	0	22	60	23	61	0.83	26.6
slr0063	Q55155	pilus biogenesis protein homologous to general secretion pathway protein E	pilB1	pilB1, gspE1, gspE, pilB	Pili proteins	Cellular Processes	PM		75.1	0
BLAST Output	PCC 11901 Accession	Percentage Identity	Alignment Length	Mismatches	Gap Open	Synechocystis sp. PCC 6803 Start	Synechocystis sp. PCC 6803 End	PCC 11901 Start	PCC 11901 End	E-value	Bit Score
tr|Q55155|Q55155_SYNY3	WP_099237884.1	65.237	676	228	2	1	672	1	673	0.0	897
tr|Q55155|Q55155_SYNY3	WP_012306326.1	38.194	288	143	11	236	506	4	273	1.03e-37	140
tr|Q55155|Q55155_SYNY3	WP_138073788.1	35.430	302	148	11	237	516	100	376	1.75e-33	130
tr|Q55155|Q55155_SYNY3	WP_138071754.1	23.364	107	82	0	236	342	250	356	2.26e-07	50.1
tr|Q55155|Q55155_SYNY3	WP_138071754.1	28.205	78	53	1	98	175	47	121	7.35e-04	38.9
tr|Q55155|Q55155_SYNY3	WP_062433174.1	51.852	27	11	2	641	666	2	27	0.21	30.8
tr|Q55155|Q55155_SYNY3	WP_138072188.1	26.804	97	48	3	320	416	2	75	0.71	29.3
slr0079	Q55799	probable general secretion pathway protein E		gspE2, pilB2	Pili proteins	Cellular Processes	PM		90.1	0
BLAST Output	PCC 11901 Accession	Percentage Identity	Alignment Length	Mismatches	Gap Open	Synechocystis sp. PCC 6803 Start	Synechocystis sp. PCC 6803 End	PCC 11901 Start	PCC 11901 End	E-value	Bit Score
tr|Q55799|Q55799_SYNY3	WP_099237884.1	32.063	630	403	7	12	635	19	629	1.77e-89	293
tr|Q55799|Q55799_SYNY3	WP_012306326.1	25.818	275	176	10	261	521	16	276	9.46e-11	60.8
tr|Q55799|Q55799_SYNY3	WP_138073788.1	23.529	153	105	5	335	482	179	324	4.62e-05	43.1
tr|Q55799|Q55799_SYNY3	WP_138071754.1	21.277	94	74	0	258	351	259	352	6.67e-04	39.3
tr|Q55799|Q55799_SYNY3	WP_138071754.1	30.357	56	37	1	98	153	52	105	0.21	31.2
tr|Q55799|Q55799_SYNY3	WP_138073409.1	25.882	85	60	2	553	636	47	129	0.37	30.4
slr0161	P74463	twitching motility protein PilT	pilT1	pilT1, pilT	Pili proteins	Cellular Processes	PM		40.6	0
BLAST Output	PCC 11901 Accession	Percentage Identity	Alignment Length	Mismatches	Gap Open	Synechocystis sp. PCC 6803 Start	Synechocystis sp. PCC 6803 End	PCC 11901 Start	PCC 11901 End	E-value	Bit Score
tr|P74463|P74463_SYNY3	WP_012306326.1	83.967	368	58	1	3	369	1	368	0.0	655
tr|P74463|P74463_SYNY3	WP_138073788.1	38.701	354	209	4	7	359	100	446	1.96e-74	234
tr|P74463|P74463_SYNY3	WP_099237884.1	37.413	286	148	8	6	275	237	507	2.01e-38	142
tr|P74463|P74463_SYNY3	WP_138071460.1	33.333	48	25	1	130	177	12	52	0.023	32.7
tr|P74463|P74463_SYNY3	WP_012307853.1	41.667	24	14	0	128	151	44	67	0.90	27.7
slr0162	P74464	a part of pilC, pilin biogenesis protein, required for twitching motility	pilC	pilC, gspF	Pili proteins	Cellular Processes	PM		17.8	0
BLAST Output	PCC 11901 Accession	Percentage Identity	Alignment Length	Mismatches	Gap Open	Synechocystis sp. PCC 6803 Start	Synechocystis sp. PCC 6803 End	PCC 11901 Start	PCC 11901 End	E-value	Bit Score
tr|P74464|P74464_SYNY3	WP_012306328.1	65.035	143	47	2	1	142	1	141	4.83e-57	180
tr|P74464|P74464_SYNY3	WP_012306328.1	27.027	74	53	1	69	142	281	353	0.006	32.7
tr|P74464|P74464_SYNY3	WP_138071750.1	23.529	85	62	1	58	142	169	250	2.67e-04	36.6
slr0163	P74465	a part of pilC, pilin biogenesis protein, required for twitching motility	pilC'	pilC', pilC	Pili proteins	Cellular Processes	PM		26.7	3
BLAST Output	PCC 11901 Accession	Percentage Identity	Alignment Length	Mismatches	Gap Open	Synechocystis sp. PCC 6803 Start	Synechocystis sp. PCC 6803 End	PCC 11901 Start	PCC 11901 End	E-value	Bit Score
tr|P74465|P74465_SYNY3	WP_012306328.1	66.187	278	85	2	30	298	135	412	3.49e-127	365
tr|P74465|P74465_SYNY3	WP_012306328.1	28.261	138	93	4	165	298	66	201	1.95e-08	51.2
tr|P74465|P74465_SYNY3	WP_138071595.1	42.857	35	20	0	30	64	395	429	0.45	28.5
tr|P74465|P74465_SYNY3	WP_138073705.1	29.545	44	30	1	4	47	695	737	0.75	27.7
Two component systems
slr0322	Q55527	two-component hybrid sensor and regulator	hik43	pilL-C, cheA, taxAY3, hik43, pilL, taxAY, slr0322	Pili proteins	Cellular Processes	PM		120.5	0
BLAST Output	PCC 11901 Accession	Percentage Identity	Alignment Length	Mismatches	Gap Open	Synechocystis sp. PCC 6803 Start	Synechocystis sp. PCC 6803 End	PCC 11901 Start	PCC 11901 End	E-value	Bit Score
tr|Q55527|Q55527_SYNY3	WP_138073816.1	52.440	1045	440	18	80	1087	18	1042	0.0	991
tr|Q55527|Q55527_SYNY3	WP_138071636.1	31.921	661	403	10	261	913	289	910	7.17e-104	345
tr|Q55527|Q55527_SYNY3	WP_138071636.1	36.207	116	73	1	961	1075	795	910	2.41e-17	84.0
tr|Q55527|Q55527_SYNY3	WP_138072007.1	31.579	665	393	10	262	912	415	1031	1.11e-101	341
tr|Q55527|Q55527_SYNY3	WP_138072007.1	39.695	131	79	0	950	1080	907	1037	2.69e-23	103
tr|Q55527|Q55527_SYNY3	WP_012306993.1	35.433	127	74	2	962	1081	2	127	3.13e-18	78.6
tr|Q55527|Q55527_SYNY3	WP_012306993.1	33.871	124	74	2	802	918	4	126	4.91e-17	75.5
tr|Q55527|Q55527_SYNY3	WP_138071339.1	36.207	116	73	1	798	913	6	120	5.67e-16	79.0
tr|Q55527|Q55527_SYNY3	WP_138071339.1	33.871	124	81	1	958	1081	4	126	3.97e-14	73.2
tr|Q55527|Q55527_SYNY3	WP_168191147.1	31.858	113	76	1	801	913	3	114	3.92e-14	72.0
tr|Q55527|Q55527_SYNY3	WP_168191147.1	31.707	123	79	2	962	1084	2	119	7.39e-14	71.2
tr|Q55527|Q55527_SYNY3	WP_168191147.1	21.693	189	109	7	441	626	217	369	0.20	31.6
tr|Q55527|Q55527_SYNY3	WP_138072603.1	32.743	113	74	2	961	1072	4	115	7.27e-14	68.9
tr|Q55527|Q55527_SYNY3	WP_138072603.1	31.405	121	81	2	802	921	7	126	1.67e-12	65.1
tr|Q55527|Q55527_SYNY3	WP_012308196.1	31.624	117	80	0	802	918	4	120	1.35e-13	65.1
tr|Q55527|Q55527_SYNY3	WP_012308196.1	28.846	104	74	0	964	1067	4	107	8.65e-10	54.3
tr|Q55527|Q55527_SYNY3	WP_030007099.1	34.545	110	68	2	801	910	7	112	2.49e-13	67.8
tr|Q55527|Q55527_SYNY3	WP_030007099.1	28.972	107	72	2	961	1067	5	107	6.70e-09	54.3
tr|Q55527|Q55527_SYNY3	WP_138071947.1	30.833	120	81	2	956	1075	20	137	9.49e-13	68.6
tr|Q55527|Q55527_SYNY3	WP_138071947.1	30.508	118	81	1	802	919	27	143	5.71e-12	66.2
tr|Q55527|Q55527_SYNY3	WP_138073075.1	32.743	113	75	1	801	913	3	114	1.11e-12	68.2
tr|Q55527|Q55527_SYNY3	WP_138073075.1	29.825	114	79	1	962	1075	2	114	7.38e-12	65.9
tr|Q55527|Q55527_SYNY3	WP_012306606.1	33.028	109	69	2	802	910	8	112	4.50e-12	63.9
tr|Q55527|Q55527_SYNY3	WP_012306606.1	28.037	107	73	2	961	1067	5	107	1.66e-09	56.2
tr|Q55527|Q55527_SYNY3	WP_012306479.1	25.000	172	117	5	795	960	14	179	5.30e-12	63.9
tr|Q55527|Q55527_SYNY3	WP_012306479.1	24.409	127	88	2	961	1081	18	142	4.03e-10	58.2
tr|Q55527|Q55527_SYNY3	WP_030007607.1	31.405	121	74	4	957	1073	5	120	6.78e-12	62.8
tr|Q55527|Q55527_SYNY3	WP_030007607.1	27.731	119	85	1	801	919	11	128	1.13e-10	59.3
tr|Q55527|Q55527_SYNY3	WP_012306534.1	33.043	115	75	2	964	1078	4	116	1.05e-11	64.3
tr|Q55527|Q55527_SYNY3	WP_012306534.1	28.829	111	78	1	800	910	2	111	6.98e-10	58.5
tr|Q55527|Q55527_SYNY3	WP_030007025.1	25.862	116	85	1	798	913	1	115	2.38e-11	60.5
tr|Q55527|Q55527_SYNY3	WP_030007025.1	24.107	112	84	1	964	1075	5	115	4.30e-09	53.9
tr|Q55527|Q55527_SYNY3	WP_084448963.1	23.649	148	97	2	949	1080	7	154	1.38e-10	58.2
tr|Q55527|Q55527_SYNY3	WP_084448963.1	21.642	134	89	2	801	918	21	154	1.11e-05	43.5
tr|Q55527|Q55527_SYNY3	WP_138073202.1	32.231	121	80	2	961	1081	7	125	2.67e-10	60.1
tr|Q55527|Q55527_SYNY3	WP_138073202.1	29.060	117	80	3	802	918	10	123	9.58e-05	42.4
tr|Q55527|Q55527_SYNY3	WP_138073202.1	25.175	143	66	5	483	624	258	360	0.087	32.7
tr|Q55527|Q55527_SYNY3	WP_138073213.1	27.350	117	84	1	802	918	277	392	1.25e-09	58.2
tr|Q55527|Q55527_SYNY3	WP_138073213.1	24.479	192	131	6	889	1073	201	385	1.91e-08	54.3
tr|Q55527|Q55527_SYNY3	WP_012308197.1	28.455	123	83	2	800	922	248	365	2.15e-09	57.0
tr|Q55527|Q55527_SYNY3	WP_012308197.1	26.613	124	90	1	957	1080	243	365	4.07e-06	46.6
tr|Q55527|Q55527_SYNY3	WP_012306487.1	29.825	114	79	1	962	1075	2	114	4.53e-09	55.1
tr|Q55527|Q55527_SYNY3	WP_012306487.1	28.070	114	81	1	802	915	4	116	1.49e-08	53.5
tr|Q55527|Q55527_SYNY3	WP_030007285.1	33.621	116	70	3	802	917	6	114	8.83e-09	53.9
tr|Q55527|Q55527_SYNY3	WP_030007285.1	30.189	106	70	2	962	1067	4	105	5.26e-08	51.6
tr|Q55527|Q55527_SYNY3	WP_138071099.1	28.829	111	76	3	964	1073	3	111	9.80e-09	53.5
tr|Q55527|Q55527_SYNY3	WP_138071099.1	27.928	111	77	2	802	911	3	111	1.25e-07	50.4
tr|Q55527|Q55527_SYNY3	WP_030007176.1	30.909	110	73	2	802	911	4	110	1.63e-08	52.8
tr|Q55527|Q55527_SYNY3	WP_030007176.1	24.167	120	88	2	962	1081	2	118	0.004	36.6
tr|Q55527|Q55527_SYNY3	WP_138073601.1	27.966	118	84	1	964	1081	7	123	1.82e-08	54.7
tr|Q55527|Q55527_SYNY3	WP_138073601.1	26.016	123	88	2	798	918	1	122	1.39e-06	48.9
tr|Q55527|Q55527_SYNY3	WP_138071879.1	26.437	174	91	4	800	938	13	184	3.68e-08	53.1
tr|Q55527|Q55527_SYNY3	WP_138071879.1	26.000	150	74	4	964	1078	15	162	9.06e-06	45.4
tr|Q55527|Q55527_SYNY3	WP_012307642.1	27.419	124	82	3	964	1083	4	123	4.12e-08	51.6
tr|Q55527|Q55527_SYNY3	WP_012307642.1	26.496	117	85	1	802	918	4	119	7.58e-07	47.8
tr|Q55527|Q55527_SYNY3	WP_138071903.1	29.091	110	77	1	802	911	13	121	6.59e-08	52.4
tr|Q55527|Q55527_SYNY3	WP_138071903.1	26.667	120	86	2	961	1079	10	128	2.51e-07	50.4
tr|Q55527|Q55527_SYNY3	WP_138072098.1	22.261	283	194	5	802	1074	797	1063	1.23e-07	52.4
tr|Q55527|Q55527_SYNY3	WP_138072098.1	22.581	124	90	2	802	919	947	1070	0.012	35.8
tr|Q55527|Q55527_SYNY3	WP_012307547.1	30.469	128	78	5	801	918	3	129	1.46e-06	45.4
tr|Q55527|Q55527_SYNY3	WP_012307547.1	24.031	129	87	5	962	1080	2	129	6.41e-06	43.5
tr|Q55527|Q55527_SYNY3	WP_138072466.1	25.225	111	79	2	801	911	5	111	5.09e-06	45.8
tr|Q55527|Q55527_SYNY3	WP_138072466.1	25.203	123	85	3	963	1082	5	123	1.05e-04	41.6
tr|Q55527|Q55527_SYNY3	WP_030006723.1	26.891	119	82	3	964	1081	3	117	8.64e-06	44.7
tr|Q55527|Q55527_SYNY3	WP_030006723.1	25.424	118	85	2	802	919	3	117	1.22e-04	41.2
tr|Q55527|Q55527_SYNY3	WP_012305635.1	26.016	123	84	3	798	918	1	118	1.86e-05	43.5
tr|Q55527|Q55527_SYNY3	WP_012305635.1	22.581	124	92	3	960	1082	1	121	0.016	34.7
tr|Q55527|Q55527_SYNY3	WP_030007550.1	39.623	53	28	1	571	623	344	392	2.77e-05	44.3
tr|Q55527|Q55527_SYNY3	WP_012306845.1	25.882	85	62	1	798	882	1	84	6.90e-05	40.4
tr|Q55527|Q55527_SYNY3	WP_012306845.1	20.536	112	88	1	964	1075	5	115	0.002	36.2
tr|Q55527|Q55527_SYNY3	WP_099240297.1	20.833	216	113	6	422	623	211	382	7.77e-05	42.7
tr|Q55527|Q55527_SYNY3	WP_099240297.1	26.667	90	49	4	998	1075	38	122	0.56	30.4
tr|Q55527|Q55527_SYNY3	WP_138072873.1	25.862	116	83	3	964	1078	643	756	8.95e-05	42.7
tr|Q55527|Q55527_SYNY3	WP_138072873.1	25.000	104	75	3	802	904	643	744	7.50e-04	40.0
tr|Q55527|Q55527_SYNY3	WP_138073218.1	25.974	77	56	1	801	877	894	969	3.49e-04	41.2
tr|Q55527|Q55527_SYNY3	WP_138073218.1	26.582	79	57	1	961	1039	892	969	0.001	39.7
tr|Q55527|Q55527_SYNY3	WP_138073052.1	25.424	118	81	2	964	1075	1149	1265	3.52e-04	41.2
tr|Q55527|Q55527_SYNY3	WP_138073052.1	24.576	118	82	2	802	913	1149	1265	0.002	38.9
tr|Q55527|Q55527_SYNY3	WP_138072003.1	25.472	106	78	1	799	904	262	366	6.24e-04	39.7
tr|Q55527|Q55527_SYNY3	WP_138072003.1	26.087	115	78	2	958	1066	253	366	0.001	38.5
tr|Q55527|Q55527_SYNY3	WP_138071500.1	23.295	176	90	6	453	623	1282	1417	0.001	39.3
tr|Q55527|Q55527_SYNY3	WP_030007177.1	43.243	37	21	0	586	622	456	492	0.008	36.2
tr|Q55527|Q55527_SYNY3	WP_030006977.1	21.293	263	161	8	369	623	184	408	0.011	35.8
tr|Q55527|Q55527_SYNY3	WP_138073155.1	24.800	125	87	4	799	919	969	1090	0.011	36.2
tr|Q55527|Q55527_SYNY3	WP_138073155.1	26.797	153	68	8	470	617	688	801	0.030	34.7
tr|Q55527|Q55527_SYNY3	WP_138073155.1	26.852	108	71	4	967	1072	980	1081	0.067	33.5
tr|Q55527|Q55527_SYNY3	WP_138072695.1	28.916	83	46	4	800	877	594	668	0.015	35.8
tr|Q55527|Q55527_SYNY3	WP_138072695.1	27.632	76	52	2	964	1039	596	668	0.35	31.2
tr|Q55527|Q55527_SYNY3	WP_138071595.1	28.358	134	54	7	481	609	480	576	0.016	35.4
tr|Q55527|Q55527_SYNY3	WP_099238081.1	42.500	40	21	2	584	622	575	613	0.022	35.0
tr|Q55527|Q55527_SYNY3	WP_099238081.1	21.081	185	129	4	754	923	574	756	0.12	32.7
tr|Q55527|Q55527_SYNY3	WP_138073735.1	26.250	160	70	5	467	624	277	390	0.026	34.7
tr|Q55527|Q55527_SYNY3	WP_138071159.1	25.517	145	69	5	481	623	339	446	0.042	33.9
tr|Q55527|Q55527_SYNY3	WP_062435686.1	29.412	51	36	0	575	625	318	368	0.049	33.5
tr|Q55527|Q55527_SYNY3	WP_138073644.1	40.000	30	18	0	767	796	322	351	0.14	32.3
tr|Q55527|Q55527_SYNY3	WP_138073924.1	34.211	38	25	0	586	623	431	468	0.22	31.6
tr|Q55527|Q55527_SYNY3	WP_012307019.1	26.000	150	69	6	478	621	531	644	0.43	30.8
tr|Q55527|Q55527_SYNY3	WP_138071539.1	31.169	77	46	4	846	918	323	396	0.53	30.4
slr1041	P73005	two-component response regulator PatA subfamily		pilG, rre6, taxP3, taxP	Pili proteins	Cellular Processes	PM		43.9	0
BLAST Output	PCC 11901 Accession	Percentage Identity	Alignment Length	Mismatches	Gap Open	Synechocystis sp. PCC 6803 Start	Synechocystis sp. PCC 6803 End	PCC 11901 Start	PCC 11901 End	E-value	Bit Score
tr|P73005|P73005_SYNY3	WP_138073213.1	43.860	399	201	4	1	384	1	391	7.98e-115	337
tr|P73005|P73005_SYNY3	WP_012308197.1	26.596	376	243	8	24	388	15	368	1.20e-40	144
tr|P73005|P73005_SYNY3	WP_138072003.1	25.574	305	201	6	98	384	83	379	2.94e-25	102
tr|P73005|P73005_SYNY3	WP_138071539.1	23.097	381	267	8	26	386	23	397	1.11e-18	83.6
tr|P73005|P73005_SYNY3	WP_012307642.1	33.898	118	76	1	265	382	1	116	8.69e-18	78.2
tr|P73005|P73005_SYNY3	WP_012306606.1	34.426	122	75	2	266	387	6	122	3.93e-17	76.6
tr|P73005|P73005_SYNY3	WP_012308196.1	33.058	121	78	2	265	384	1	119	2.41e-15	68.6
tr|P73005|P73005_SYNY3	WP_138072603.1	28.814	118	83	1	266	383	5	121	3.88e-15	70.9
tr|P73005|P73005_SYNY3	WP_030007607.1	41.558	77	45	0	312	388	54	130	5.27e-15	70.1
tr|P73005|P73005_SYNY3	WP_012306993.1	36.458	96	54	1	294	382	28	123	1.35e-14	67.0
tr|P73005|P73005_SYNY3	WP_030007025.1	26.016	123	89	1	266	388	3	123	7.83e-14	66.2
tr|P73005|P73005_SYNY3	WP_138071947.1	32.520	123	81	1	265	387	24	144	8.33e-14	69.3
tr|P73005|P73005_SYNY3	WP_138073075.1	35.088	114	72	1	268	381	4	115	1.00e-13	68.9
tr|P73005|P73005_SYNY3	WP_030007099.1	29.752	121	80	2	268	388	8	123	4.64e-13	65.1
tr|P73005|P73005_SYNY3	WP_012306479.1	37.333	75	45	1	313	387	71	143	5.11e-13	65.1
tr|P73005|P73005_SYNY3	WP_138071339.1	40.260	77	46	0	311	387	51	127	2.12e-12	65.1
tr|P73005|P73005_SYNY3	WP_012306487.1	35.955	89	57	0	299	387	33	121	2.34e-12	63.2
tr|P73005|P73005_SYNY3	WP_138071903.1	37.647	85	53	0	302	386	45	129	2.50e-12	63.9
tr|P73005|P73005_SYNY3	WP_012306534.1	29.915	117	80	1	267	383	3	117	6.56e-12	62.8
tr|P73005|P73005_SYNY3	WP_030006723.1	30.328	122	81	2	267	388	2	119	1.52e-11	60.1
tr|P73005|P73005_SYNY3	WP_030007285.1	31.405	121	78	2	267	387	5	120	3.30e-11	59.3
tr|P73005|P73005_SYNY3	WP_138072007.1	29.921	127	84	3	264	388	917	1040	3.71e-11	61.2
tr|P73005|P73005_SYNY3	WP_138072466.1	42.105	76	41	2	312	387	48	120	4.38e-11	59.3
tr|P73005|P73005_SYNY3	WP_138073816.1	28.837	215	118	9	186	378	827	1028	5.92e-11	60.8
tr|P73005|P73005_SYNY3	WP_138073816.1	37.879	66	41	0	313	378	807	872	1.36e-09	56.2
tr|P73005|P73005_SYNY3	WP_168191147.1	32.895	76	51	0	312	387	46	121	1.46e-10	58.5
tr|P73005|P73005_SYNY3	WP_138071636.1	36.486	74	47	0	313	386	843	916	1.92e-10	58.9
tr|P73005|P73005_SYNY3	WP_012305635.1	36.842	76	46	1	313	388	48	121	2.95e-10	56.2
tr|P73005|P73005_SYNY3	WP_138073601.1	28.689	122	81	3	267	386	6	123	3.43e-10	58.2
tr|P73005|P73005_SYNY3	WP_138071099.1	27.692	130	76	3	267	388	2	121	8.22e-10	55.1
tr|P73005|P73005_SYNY3	WP_138073202.1	34.000	100	63	3	288	386	28	125	3.74e-09	54.3
tr|P73005|P73005_SYNY3	WP_012306845.1	38.356	73	39	2	310	381	45	112	1.03e-07	47.0
tr|P73005|P73005_SYNY3	WP_030007176.1	36.986	73	44	2	314	386	48	118	1.24e-07	48.5
tr|P73005|P73005_SYNY3	WP_012305855.1	30.588	85	57	1	302	386	46	128	1.28e-07	48.9
tr|P73005|P73005_SYNY3	WP_084448963.1	28.169	71	51	0	312	382	81	151	2.97e-07	46.6
tr|P73005|P73005_SYNY3	WP_138073052.1	27.059	170	111	5	217	378	1099	1263	1.26e-06	47.0
tr|P73005|P73005_SYNY3	WP_138073155.1	34.091	88	57	1	302	388	1005	1092	4.04e-06	45.4
tr|P73005|P73005_SYNY3	WP_138071879.1	29.474	95	32	1	312	371	57	151	6.37e-05	40.8
tr|P73005|P73005_SYNY3	WP_138072873.1	28.302	106	72	3	267	371	642	744	4.07e-04	38.9
tr|P73005|P73005_SYNY3	WP_138073218.1	27.397	73	50	2	313	384	938	1008	4.10e-04	38.9
tr|P73005|P73005_SYNY3	WP_138072098.1	37.681	69	36	3	314	377	995	1061	0.006	35.0
tr|P73005|P73005_SYNY3	WP_012307547.1	27.941	68	39	3	313	371	48	114	0.007	33.1
tr|P73005|P73005_SYNY3	WP_099238081.1	28.571	98	68	2	291	387	657	753	0.012	34.3
tr|P73005|P73005_SYNY3	WP_030006454.1	39.286	28	17	0	310	337	48	75	0.079	30.8
tr|P73005|P73005_SYNY3	WP_138072695.1	39.394	33	18	1	312	344	638	668	0.42	29.3
tr|P73005|P73005_SYNY3	WP_138072772.1	25.424	59	43	1	303	361	169	226	0.82	28.1
slr1044	P73008	methyl-accepting chemotaxis protein, required for the biogenesis of thick pilli	ctr1	pilJ, ctr1, taxD3, mcpA, ctrI	Pili proteins	Cellular Processes	PM		93.2	2
BLAST Output	PCC 11901 Accession	Percentage Identity	Alignment Length	Mismatches	Gap Open	Synechocystis sp. PCC 6803 Start	Synechocystis sp. PCC 6803 End	PCC 11901 Start	PCC 11901 End	E-value	Bit Score
tr|P73008|P73008_SYNY3	WP_138073212.1	65.825	515	148	4	357	868	409	898	0.0	606
tr|P73008|P73008_SYNY3	WP_138073212.1	34.375	96	63	0	5	100	6	101	3.97e-12	66.6
tr|P73008|P73008_SYNY3	WP_138071638.1	40.048	417	240	3	461	867	598	1014	4.23e-73	256
tr|P73008|P73008_SYNY3	WP_138072005.1	42.679	321	183	1	547	867	1172	1491	9.44e-56	206
tr|P73008|P73008_SYNY3	WP_138071510.1	27.068	133	74	4	563	695	202	311	0.15	32.0
tr|P73008|P73008_SYNY3	WP_138073313.1	37.838	37	23	0	29	65	666	702	0.89	29.6
slr1274	P74186	probable fimbrial assembly protein PilM, required for motility	pilM	pilM	Pili proteins	Cellular Processes	PM		40.9	0
BLAST Output	PCC 11901 Accession	Percentage Identity	Alignment Length	Mismatches	Gap Open	Synechocystis sp. PCC 6803 Start	Synechocystis sp. PCC 6803 End	PCC 11901 Start	PCC 11901 End	E-value	Bit Score
tr|P74186|P74186_SYNY3	WP_138072476.1	71.585	366	104	0	1	366	1	366	0.0	541
tr|P74186|P74186_SYNY3	WP_138073816.1	21.019	157	111	4	170	323	339	485	0.35	29.3
slr1275	P74187	hypothetical protein		pilN, slr1275	Pili proteins	Cellular Processes	PM		30	1
BLAST Output	PCC 11901 Accession	Percentage Identity	Alignment Length	Mismatches	Gap Open	Synechocystis sp. PCC 6803 Start	Synechocystis sp. PCC 6803 End	PCC 11901 Start	PCC 11901 End	E-value	Bit Score
tr|P74187|P74187_SYNY3	WP_138072478.1	29.008	262	148	10	1	246	1	240	2.47e-18	79.0
slr1276	P74188	hypothetical protein		pilO, slr1276	Pili proteins	Cellular Processes	PM		30	1
BLAST Output	PCC 11901 Accession	Percentage Identity	Alignment Length	Mismatches	Gap Open	Synechocystis sp. PCC 6803 Start	Synechocystis sp. PCC 6803 End	PCC 11901 Start	PCC 11901 End	E-value	Bit Score
tr|P74188|P74188_SYNY3	WP_138072480.1	30.882	204	137	4	3	203	2	204	2.01e-24	95.9
tr|P74188|P74188_SYNY3	WP_138072957.1	52.174	23	11	0	26	48	165	187	0.49	28.1
slr1928	P74480	type 4 pilin-like protein	pilA5	pilA5	Pili proteins	Cellular Processes	PM		16.1	1
BLAST Output	PCC 11901 Accession	Percentage Identity	Alignment Length	Mismatches	Gap Open	Synechocystis sp. PCC 6803 Start	Synechocystis sp. PCC 6803 End	PCC 11901 Start	PCC 11901 End	E-value	Bit Score
tr|P74480|P74480_SYNY3	WP_030007008.1	29.885	174	98	6	33	193	15	177	4.02e-14	64.3
tr|P74480|P74480_SYNY3	WP_138073344.1	29.577	71	41	3	34	95	16	86	0.18	28.9
tr|P74480|P74480_SYNY3	WP_012306959.1	33.929	56	34	2	6	61	144	196	0.95	26.2
slr1931	P74483	type 4 pilin-like protein	pilA8	pilA8, slr1931	Pili proteins	Cellular Processes	PM		31.9	1
BLAST Output	PCC 11901 Accession	Percentage Identity	Alignment Length	Mismatches	Gap Open	Synechocystis sp. PCC 6803 Start	Synechocystis sp. PCC 6803 End	PCC 11901 Start	PCC 11901 End	E-value	Bit Score
tr|P74483|P74483_SYNY3	WP_138073344.1	29.630	81	53	1	1	77	6	86	1.64e-06	45.8
slr2015	P73235	type 4 pilin-like protein, essential for motility	pilA9	pilA9	Pili proteins	Cellular Processes	PM		39.8	1
BLAST Output	PCC 11901 Accession	Percentage Identity	Alignment Length	Mismatches	Gap Open	Synechocystis sp. PCC 6803 Start	Synechocystis sp. PCC 6803 End	PCC 11901 Start	PCC 11901 End	E-value	Bit Score
tr|P73235|P73235_SYNY3	WP_138071861.1	47.059	34	18	0	13	46	26	59	0.006	34.3
tr|P73235|P73235_SYNY3	WP_138073345.1	28.169	71	49	1	27	95	16	86	0.016	32.7
tr|P73235|P73235_SYNY3	WP_138072124.1	27.000	100	65	4	106	203	173	266	0.18	30.0
tr|P73235|P73235_SYNY3	WP_138073343.1	30.508	59	35	1	26	78	13	71	0.79	27.7
tr|P73235|P73235_SYNY3	WP_012306885.1	31.818	44	30	0	334	377	13	56	0.79	26.2
slr2016	P73236	type 4 pilin-like protein, essential for motility	pilA10	pilA10	Pili proteins	Cellular Processes	PM		17.5	1
BLAST Output	PCC 11901 Accession	Percentage Identity	Alignment Length	Mismatches	Gap Open	Synechocystis sp. PCC 6803 Start	Synechocystis sp. PCC 6803 End	PCC 11901 Start	PCC 11901 End	E-value	Bit Score
slr2017	P73237	type 4 pilin-like protein, essential for motility	pilA11	pilA11	Pili proteins	Cellular Processes	PM		38.4	1
BLAST Output	PCC 11901 Accession	Percentage Identity	Alignment Length	Mismatches	Gap Open	Synechocystis sp. PCC 6803 Start	Synechocystis sp. PCC 6803 End	PCC 11901 Start	PCC 11901 End	E-value	Bit Score
tr|P73237|P73237_SYNY3	WP_138071861.1	42.424	33	19	0	9	41	24	56	0.31	28.9
slr1042	P73006	two-component response regulator CheY subfamily		pilH, rre7, taxY3, taxY	Pili proteins	Cellular Processes	Soluble proteins		13.7	0
BLAST Output	PCC 11901 Accession	Percentage Identity	Alignment Length	Mismatches	Gap Open	Synechocystis sp. PCC 6803 Start	Synechocystis sp. PCC 6803 End	PCC 11901 Start	PCC 11901 End	E-value	Bit Score
tr|P73006|P73006_SYNY3	WP_012306993.1	67.969	128	34	1	27	147	1	128	8.17e-64	188
tr|P73006|P73006_SYNY3	WP_012308196.1	45.000	120	65	1	27	145	1	120	9.57e-38	122
tr|P73006|P73006_SYNY3	WP_138072603.1	41.026	117	68	1	30	145	7	123	7.85e-29	102
tr|P73006|P73006_SYNY3	WP_012306606.1	41.880	117	65	1	30	146	8	121	1.26e-28	102
tr|P73006|P73006_SYNY3	WP_030007607.1	35.897	117	75	0	29	145	11	127	1.27e-26	96.3
tr|P73006|P73006_SYNY3	WP_030007099.1	39.831	118	68	1	29	146	7	121	9.98e-25	92.0
tr|P73006|P73006_SYNY3	WP_030007285.1	37.607	117	70	1	30	146	6	119	2.43e-23	88.2
tr|P73006|P73006_SYNY3	WP_012307642.1	36.364	121	76	1	27	146	1	121	4.87e-23	87.0
tr|P73006|P73006_SYNY3	WP_012306479.1	37.879	132	73	2	22	146	13	142	7.06e-23	87.4
tr|P73006|P73006_SYNY3	WP_138071339.1	38.462	117	72	0	30	146	10	126	3.42e-21	85.1
tr|P73006|P73006_SYNY3	WP_138071903.1	34.711	121	76	1	30	147	13	133	5.73e-21	84.0
tr|P73006|P73006_SYNY3	WP_138071947.1	33.333	126	81	1	17	142	17	139	6.06e-21	84.3
tr|P73006|P73006_SYNY3	WP_138073816.1	43.269	104	58	1	30	132	763	866	1.52e-20	83.6
tr|P73006|P73006_SYNY3	WP_138073816.1	36.538	104	65	1	30	132	919	1022	9.57e-17	72.4
tr|P73006|P73006_SYNY3	WP_012306487.1	32.500	120	81	0	27	146	1	120	6.20e-20	79.7
tr|P73006|P73006_SYNY3	WP_030006723.1	35.043	117	74	1	30	146	3	117	7.44e-20	79.0
tr|P73006|P73006_SYNY3	WP_168191147.1	35.345	116	75	0	27	142	1	116	9.68e-20	80.5
tr|P73006|P73006_SYNY3	WP_012305635.1	30.769	117	79	1	30	146	5	119	1.45e-19	78.2
tr|P73006|P73006_SYNY3	WP_012306534.1	34.167	120	79	0	27	146	1	120	3.88e-19	79.0
tr|P73006|P73006_SYNY3	WP_138073075.1	33.043	115	77	0	27	141	1	115	4.85e-19	79.0
tr|P73006|P73006_SYNY3	WP_138073202.1	32.479	117	78	1	30	146	10	125	1.78e-18	77.0
tr|P73006|P73006_SYNY3	WP_138072007.1	30.769	130	87	2	15	142	906	1034	1.07e-17	75.1
tr|P73006|P73006_SYNY3	WP_138073213.1	28.814	118	84	0	30	147	277	394	9.82e-17	72.0
tr|P73006|P73006_SYNY3	WP_012308197.1	30.000	110	77	0	33	142	253	362	1.38e-16	71.6
tr|P73006|P73006_SYNY3	WP_138073601.1	28.205	117	84	0	30	146	7	123	1.63e-16	71.6
tr|P73006|P73006_SYNY3	WP_030007025.1	27.826	115	83	0	28	142	3	117	2.07e-15	66.2
tr|P73006|P73006_SYNY3	WP_030007176.1	29.752	121	83	1	27	147	1	119	6.99e-15	65.5
tr|P73006|P73006_SYNY3	WP_138071099.1	33.884	121	72	3	30	146	3	119	2.28e-14	64.3
tr|P73006|P73006_SYNY3	WP_138072873.1	30.769	104	72	0	30	133	643	746	1.00e-13	63.9
tr|P73006|P73006_SYNY3	WP_138073052.1	30.252	119	77	2	30	142	1149	1267	4.83e-13	62.0
tr|P73006|P73006_SYNY3	WP_138072003.1	26.549	113	83	0	33	145	268	380	1.19e-12	60.5
tr|P73006|P73006_SYNY3	WP_138071636.1	28.814	118	78	2	30	143	798	913	2.17e-12	60.1
tr|P73006|P73006_SYNY3	WP_138072466.1	26.271	118	84	1	29	146	5	119	2.18e-11	56.6
tr|P73006|P73006_SYNY3	WP_138072098.1	27.972	143	93	3	14	146	928	1070	2.90e-11	56.6
tr|P73006|P73006_SYNY3	WP_138072098.1	33.962	53	31	1	30	78	797	849	0.054	29.6
tr|P73006|P73006_SYNY3	WP_138071539.1	28.829	111	78	1	37	146	287	397	1.59e-10	54.3
tr|P73006|P73006_SYNY3	WP_012307547.1	28.070	114	73	3	27	131	1	114	5.66e-10	50.8
tr|P73006|P73006_SYNY3	WP_138073155.1	31.579	114	74	3	21	131	963	1075	6.12e-10	53.1
tr|P73006|P73006_SYNY3	WP_012306845.1	25.439	114	81	2	30	143	5	114	2.88e-09	48.9
tr|P73006|P73006_SYNY3	WP_138071879.1	29.293	99	65	2	30	127	15	109	3.02e-09	50.8
tr|P73006|P73006_SYNY3	WP_084448963.1	21.642	134	88	2	29	145	21	154	6.85e-09	48.5
tr|P73006|P73006_SYNY3	WP_138073218.1	25.210	119	86	2	29	146	894	1010	2.09e-08	48.5
tr|P73006|P73006_SYNY3	WP_012305855.1	27.966	118	77	5	19	133	3	115	6.28e-06	40.8
tr|P73006|P73006_SYNY3	WP_030006454.1	35.000	40	26	0	57	96	35	74	3.13e-04	35.8
tr|P73006|P73006_SYNY3	WP_099238081.1	20.000	115	90	2	30	143	636	749	6.86e-04	35.4
tr|P73006|P73006_SYNY3	WP_099240297.1	25.225	111	64	5	30	130	8	109	0.003	33.1
tr|P73006|P73006_SYNY3	WP_138071412.1	27.660	47	33	1	92	137	128	174	0.14	28.1
tr|P73006|P73006_SYNY3	WP_138072695.1	21.053	76	60	0	72	147	43	118	0.25	27.7
sll1107	P74719	type IV pilus biogenesis protein PilI homolog			Pili proteins	Cellular Processes	Unknown		28.4	5
BLAST Output	PCC 11901 Accession	Percentage Identity	Alignment Length	Mismatches	Gap Open	Synechocystis sp. PCC 6803 Start	Synechocystis sp. PCC 6803 End	PCC 11901 Start	PCC 11901 End	E-value	Bit Score
tr|P74719|P74719_SYNY3	WP_138071680.1	53.731	268	111	2	2	258	1	266	1.39e-100	291
slr0073	Q55788	two-component sensor histidine kinase	hik36	pilL-N, cheA, hik36, pilL, pilN	Pili proteins	Cellular Processes	Unknown		35	0
BLAST Output	PCC 11901 Accession	Percentage Identity	Alignment Length	Mismatches	Gap Open	Synechocystis sp. PCC 6803 Start	Synechocystis sp. PCC 6803 End	PCC 11901 Start	PCC 11901 End	E-value	Bit Score
tr|Q55788|Q55788_SYNY3	WP_138072957.1	51.163	301	142	2	16	311	6	306	1.94e-99	292
tr|Q55788|Q55788_SYNY3	WP_138072007.1	35.075	134	79	3	22	153	15	142	2.97e-16	75.9
tr|Q55788|Q55788_SYNY3	WP_138071636.1	22.901	262	166	11	40	289	48	285	2.34e-07	48.5
tr|Q55788|Q55788_SYNY3	WP_012305956.1	28.000	100	63	4	54	146	1	98	0.20	28.9
slr1227	P73472	chloroplastic outer envelope membrane protein homolog		IAP75, pilA11	Pili proteins	Cellular Processes	Unknown		92.3	0
BLAST Output	PCC 11901 Accession	Percentage Identity	Alignment Length	Mismatches	Gap Open	Synechocystis sp. PCC 6803 Start	Synechocystis sp. PCC 6803 End	PCC 11901 Start	PCC 11901 End	E-value	Bit Score
tr|P73472|P73472_SYNY3	WP_138072258.1	55.810	611	254	7	257	861	123	723	0.0	667
slr1277	P74189	pilus assembly protein homologous to general secretion pathway protein D		pilQ, gspD	Pili proteins	Cellular Processes	Unknown		84.6	0
BLAST Output	PCC 11901 Accession	Percentage Identity	Alignment Length	Mismatches	Gap Open	Synechocystis sp. PCC 6803 Start	Synechocystis sp. PCC 6803 End	PCC 11901 Start	PCC 11901 End	E-value	Bit Score
tr|P74189|P74189_SYNY3	WP_168191127.1	33.974	624	361	12	171	782	176	760	7.04e-88	290
slr1929	P74481	type 4 pilin-like protein	pilA6	pilA6	Pili proteins	Cellular Processes	Unknown		19.2	1
BLAST Output	PCC 11901 Accession	Percentage Identity	Alignment Length	Mismatches	Gap Open	Synechocystis sp. PCC 6803 Start	Synechocystis sp. PCC 6803 End	PCC 11901 Start	PCC 11901 End	E-value	Bit Score
tr|P74481|P74481_SYNY3	WP_138073345.1	32.484	157	96	2	21	176	11	158	1.14e-20	80.9
tr|P74481|P74481_SYNY3	WP_138073343.1	28.235	170	101	3	24	181	12	172	5.87e-14	63.5
tr|P74481|P74481_SYNY3	WP_138071861.1	36.364	66	36	2	10	75	26	85	0.002	34.3
tr|P74481|P74481_SYNY3	WP_138073344.1	28.571	77	44	2	10	75	4	80	0.65	26.9
slr1120	P72640	type 4 prepilin-like proteins leader peptide processing enzyme		pilD, hofD, hopD, hotD	Pili proteins	Cellular Processes
BLAST Output	PCC 11901 Accession	Percentage Identity	Alignment Length	Mismatches	Gap Open	Synechocystis sp. PCC 6803 Start	Synechocystis sp. PCC 6803 End	PCC 11901 Start	PCC 11901 End	E-value	Bit Score
sp|P72640|LEP4_SYNY3	WP_138071646.1	55.985	259	111	1	8	263	13	271	2.88e-94	275
sp|P72640|LEP4_SYNY3	WP_138073885.1	34.286	70	38	1	127	196	18	79	0.74	27.7
slr1930	P74482	type 4 pilin-like protein	pilA7	pilA7	Pili proteins	Cellular Processes
BLAST Output	PCC 11901 Accession	Percentage Identity	Alignment Length	Mismatches	Gap Open	Synechocystis sp. PCC 6803 Start	Synechocystis sp. PCC 6803 End	PCC 11901 Start	PCC 11901 End	E-value	Bit Score
tr|P74482|P74482_SYNY3	WP_138073345.1	31.098	164	107	3	21	184	14	171	2.29e-24	90.9
tr|P74482|P74482_SYNY3	WP_138073343.1	24.571	175	118	5	17	182	8	177	8.52e-12	57.8
tr|P74482|P74482_SYNY3	WP_138071861.1	30.303	66	39	2	13	72	24	88	0.001	35.0
sll1181	P74175	similar to hemolysin secretion protein		hlyD	Random proteins (Cell killing)	Cellular Processes	PM		64.7	0
BLAST Output	PCC 11901 Accession	Percentage Identity	Alignment Length	Mismatches	Gap Open	Synechocystis sp. PCC 6803 Start	Synechocystis sp. PCC 6803 End	PCC 11901 Start	PCC 11901 End	E-value	Bit Score
tr|P74175|P74175_SYNY3	WP_138071087.1	44.879	537	278	4	54	580	1	529	1.08e-150	441
tr|P74175|P74175_SYNY3	WP_138073763.1	26.786	168	105	4	342	502	163	319	1.33e-04	40.8
tr|P74175|P74175_SYNY3	WP_138073412.1	31.818	66	43	1	431	496	284	347	0.008	35.4
tr|P74175|P74175_SYNY3	WP_138073412.1	30.508	59	39	1	88	146	43	99	0.036	33.1
tr|P74175|P74175_SYNY3	WP_012308147.1	29.114	79	55	1	90	168	61	138	0.37	30.0
tr|P74175|P74175_SYNY3	WP_138073384.1	37.500	48	29	1	337	383	172	219	0.77	28.9
tr|P74175|P74175_SYNY3	WP_138071313.1	29.787	47	33	0	217	263	330	376	0.88	28.9
tr|P74175|P74175_SYNY3	WP_030006557.1	36.957	46	22	1	2	47	86	124	1.00	28.5
slr1747	P73738	cell death suppressor protein Lls1 homolog			Random proteins (Cell killing)	Cellular Processes	TM		52.5	2
BLAST Output	PCC 11901 Accession	Percentage Identity	Alignment Length	Mismatches	Gap Open	Synechocystis sp. PCC 6803 Start	Synechocystis sp. PCC 6803 End	PCC 11901 Start	PCC 11901 End	E-value	Bit Score
tr|P73738|P73738_SYNY3	WP_138071650.1	50.909	440	206	6	28	464	17	449	4.62e-153	439
tr|P73738|P73738_SYNY3	WP_138073672.1	31.551	187	112	7	16	194	8	186	1.48e-17	80.5
slr0950	P74319	hemolysin-like protein			Random proteins (Cell killing)	Cellular Processes	Unknown		30	0
BLAST Output	PCC 11901 Accession	Percentage Identity	Alignment Length	Mismatches	Gap Open	Synechocystis sp. PCC 6803 Start	Synechocystis sp. PCC 6803 End	PCC 11901 Start	PCC 11901 End	E-value	Bit Score
tr|P74319|P74319_SYNY3	WP_138072450.1	72.314	242	66	1	6	246	3	244	5.32e-125	354
sll0720	P74650	RTX toxin activating protein homolog			Random proteins (Cell killing)	Cellular Processes
BLAST Output	PCC 11901 Accession	Percentage Identity	Alignment Length	Mismatches	Gap Open	Synechocystis sp. PCC 6803 Start	Synechocystis sp. PCC 6803 End	PCC 11901 Start	PCC 11901 End	E-value	Bit Score
sp|P74650|Y720_SYNY3	WP_138071212.1	28.571	84	46	4	45	114	94	177	0.32	27.3
sp|P74650|Y720_SYNY3	WP_138073432.1	23.704	135	82	5	10	139	493	611	0.39	27.3
sll1615	P73839	thiophen and furan oxidation protein		thdF, trmE	Random proteins (Detoxification)	Cellular Processes	Soluble proteins		50	0
BLAST Output	PCC 11901 Accession	Percentage Identity	Alignment Length	Mismatches	Gap Open	Synechocystis sp. PCC 6803 Start	Synechocystis sp. PCC 6803 End	PCC 11901 Start	PCC 11901 End	E-value	Bit Score
sp|P73839|MNME_SYNY3	WP_138073099.1	70.217	460	133	1	1	456	1	460	0.0	634
sp|P73839|MNME_SYNY3	WP_012305762.1	41.935	124	67	2	220	338	175	298	4.03e-19	85.9
sp|P73839|MNME_SYNY3	WP_012305762.1	33.051	118	76	2	224	338	6	123	2.66e-09	55.5
sp|P73839|MNME_SYNY3	WP_030007130.1	33.333	123	79	2	218	338	18	139	4.78e-11	60.1
sp|P73839|MNME_SYNY3	WP_138071986.1	31.707	123	73	3	222	339	62	178	1.11e-06	47.0
sp|P73839|MNME_SYNY3	WP_138073575.1	26.633	199	98	8	173	338	16	199	1.07e-05	43.9
sp|P73839|MNME_SYNY3	WP_030006721.1	30.508	177	101	7	180	339	80	251	7.05e-05	41.6
sp|P73839|MNME_SYNY3	WP_138073360.1	30.000	70	45	2	212	281	12	77	3.06e-04	39.7
sp|P73839|MNME_SYNY3	WP_062434581.1	30.337	89	39	2	222	290	2	87	6.62e-04	38.1
sp|P73839|MNME_SYNY3	WP_181445693.1	24.706	170	107	6	225	378	397	561	0.013	34.3
sp|P73839|MNME_SYNY3	WP_138073307.1	26.816	179	112	7	223	385	161	336	0.040	32.3
sp|P73839|MNME_SYNY3	WP_030007630.1	36.364	77	33	3	111	175	27	99	0.40	28.1
sp|P73839|MNME_SYNY3	WP_138072760.1	24.359	156	103	6	189	338	438	584	0.79	28.5
sll1987	P73911	catalase peroxidase	cpx, katG	cpx, katG	Random proteins (Detoxification)	Cellular Processes	Soluble proteins		81.4	0
BLAST Output	PCC 11901 Accession	Percentage Identity	Alignment Length	Mismatches	Gap Open	Synechocystis sp. PCC 6803 Start	Synechocystis sp. PCC 6803 End	PCC 11901 Start	PCC 11901 End	E-value	Bit Score
sp|P73911|KATG_SYNY3	WP_138073713.1	76.072	723	158	6	35	751	7	720	0.0	1140
sp|P73911|KATG_SYNY3	WP_062433174.1	33.333	57	34	2	521	576	336	389	0.81	29.3
slr1516	P77968	superoxide dismutase	sodB	sodB	Random proteins (Detoxification)	Cellular Processes	Soluble proteins		21.7	0
BLAST Output	PCC 11901 Accession	Percentage Identity	Alignment Length	Mismatches	Gap Open	Synechocystis sp. PCC 6803 Start	Synechocystis sp. PCC 6803 End	PCC 11901 Start	PCC 11901 End	E-value	Bit Score
sp|P77968|SODF_SYNY3	WP_030006045.1	86.935	199	26	0	1	199	1	199	5.46e-131	363
sll1980	P73920	thiol:disulfide interchange protein TrxA	trxA	txlA, trxA, trxA3	Random proteins (Detoxification)	Cellular Processes	TM		19.5	1
BLAST Output	PCC 11901 Accession	Percentage Identity	Alignment Length	Mismatches	Gap Open	Synechocystis sp. PCC 6803 Start	Synechocystis sp. PCC 6803 End	PCC 11901 Start	PCC 11901 End	E-value	Bit Score
sp|P73920|TXLA_SYNY3	WP_138073144.1	57.895	171	72	0	5	175	10	180	3.71e-74	218
sp|P73920|TXLA_SYNY3	WP_012306818.1	34.146	82	50	3	47	128	13	90	3.31e-09	49.3
sp|P73920|TXLA_SYNY3	WP_012307227.1	27.907	86	59	2	49	134	17	99	1.62e-07	44.3
sp|P73920|TXLA_SYNY3	WP_012305927.1	30.882	68	43	2	49	115	18	82	3.81e-06	40.8
sp|P73920|TXLA_SYNY3	WP_012307964.1	33.333	45	28	1	53	97	19	61	1.29e-05	39.3
sp|P73920|TXLA_SYNY3	WP_168191159.1	23.958	96	62	2	54	141	69	161	4.53e-04	35.8
sll0755	Q55624	thioredoxin peroxidase	tpx, ycf42	tpx, 2-CP, 2-cys prx, ycf42	Random proteins (Detoxification)	Cellular Processes	Unknown		22.5	0
BLAST Output	PCC 11901 Accession	Percentage Identity	Alignment Length	Mismatches	Gap Open	Synechocystis sp. PCC 6803 Start	Synechocystis sp. PCC 6803 End	PCC 11901 Start	PCC 11901 End	E-value	Bit Score
sp|Q55624|Y755_SYNY3	WP_030005827.1	72.917	192	52	0	6	197	4	195	4.16e-111	312
sp|Q55624|Y755_SYNY3	WP_065715821.1	31.148	183	117	5	5	184	3	179	2.22e-27	100
sp|Q55624|Y755_SYNY3	WP_138072953.1	34.375	160	87	5	5	156	4	153	2.11e-18	75.1
sp|Q55624|Y755_SYNY3	WP_030006741.1	31.928	166	101	4	6	168	34	190	1.20e-16	71.2
sp|Q55624|Y755_SYNY3	WP_030006221.1	43.478	23	10	1	169	188	94	116	0.54	26.9
slr6037	Q6YRW7	arsenate reductase		arsI2	Random proteins (Detoxification)	Cellular Processes	Unknown		15.5	0
BLAST Output	PCC 11901 Accession	Percentage Identity	Alignment Length	Mismatches	Gap Open	Synechocystis sp. PCC 6803 Start	Synechocystis sp. PCC 6803 End	PCC 11901 Start	PCC 11901 End	E-value	Bit Score
sp|Q6YRW7|ARSI2_SYNY3	WP_099240001.1	38.095	42	18	2	17	55	42	78	0.91	24.6
sll5104	Q6ZEM6	arsenate reductase		arsI1	Random proteins (Detoxification)	Cellular Processes
BLAST Output	PCC 11901 Accession	Percentage Identity	Alignment Length	Mismatches	Gap Open	Synechocystis sp. PCC 6803 Start	Synechocystis sp. PCC 6803 End	PCC 11901 Start	PCC 11901 End	E-value	Bit Score
sp|Q6ZEM6|ARSI1_SYNY3	WP_099240001.1	38.095	42	18	2	21	59	42	78	0.88	24.6
sll0533	Q55511	trigger factor		tig	Random proteins (Protein and peptide secretion)	Cellular Processes	Unknown		52.6	0
BLAST Output	PCC 11901 Accession	Percentage Identity	Alignment Length	Mismatches	Gap Open	Synechocystis sp. PCC 6803 Start	Synechocystis sp. PCC 6803 End	PCC 11901 Start	PCC 11901 End	E-value	Bit Score
sp|Q55511|TIG_SYNY3	WP_138073162.1	44.519	447	240	5	1	444	1	442	2.96e-121	358
slr1366	P73540	lipoprotein signal peptidase (signal peptidase II)		lspA	Random proteins (Protein and peptide secretion)	Cellular Processes
BLAST Output	PCC 11901 Accession	Percentage Identity	Alignment Length	Mismatches	Gap Open	Synechocystis sp. PCC 6803 Start	Synechocystis sp. PCC 6803 End	PCC 11901 Start	PCC 11901 End	E-value	Bit Score
sp|P73540|LSPA_SYNY3	WP_138072248.1	63.889	144	51	1	6	148	6	149	6.30e-57	172
sll1929	P73100	competence protein ComE	comE	comEC	Random proteins (Transformation)	Cellular Processes	PM		77.8	12
BLAST Output	PCC 11901 Accession	Percentage Identity	Alignment Length	Mismatches	Gap Open	Synechocystis sp. PCC 6803 Start	Synechocystis sp. PCC 6803 End	PCC 11901 Start	PCC 11901 End	E-value	Bit Score
tr|P73100|P73100_SYNY3	WP_138072837.1	31.544	745	450	12	1	705	1	725	2.07e-83	276
slr0197	Q55769	competence protein	comA	comA, comEA	Random proteins (Transformation)	Cellular Processes	Unknown		61.2	1
BLAST Output	PCC 11901 Accession	Percentage Identity	Alignment Length	Mismatches	Gap Open	Synechocystis sp. PCC 6803 Start	Synechocystis sp. PCC 6803 End	PCC 11901 Start	PCC 11901 End	E-value	Bit Score
tr|Q55769|Q55769_SYNY3	WP_138073503.1	48.162	544	243	7	16	553	10	520	3.74e-166	479
slr0904	Q55372	competence protein ComM homolog	comM	comM	Random proteins (Transformation)	Cellular Processes	Unknown		55.1	0
BLAST Output	PCC 11901 Accession	Percentage Identity	Alignment Length	Mismatches	Gap Open	Synechocystis sp. PCC 6803 Start	Synechocystis sp. PCC 6803 End	PCC 11901 Start	PCC 11901 End	E-value	Bit Score
tr|Q55372|Q55372_SYNY3	WP_138072317.1	73.529	510	131	2	1	508	1	508	0.0	773
tr|Q55372|Q55372_SYNY3	WP_138072402.1	25.616	203	103	8	216	400	621	793	1.64e-05	43.9
tr|Q55372|Q55372_SYNY3	WP_012307853.1	35.000	60	39	0	292	351	142	201	3.86e-05	42.4
tr|Q55372|Q55372_SYNY3	WP_138071325.1	24.378	201	112	8	216	402	606	780	2.35e-04	40.0
tr|Q55372|Q55372_SYNY3	WP_138072588.1	34.426	61	40	0	291	351	135	195	2.64e-04	40.0
tr|Q55372|Q55372_SYNY3	WP_138072301.1	30.380	79	22	1	158	236	183	228	0.003	36.6
tr|Q55372|Q55372_SYNY3	WP_030006985.1	33.333	54	33	1	190	240	8	61	0.004	35.8
tr|Q55372|Q55372_SYNY3	WP_138073103.1	26.582	79	25	2	158	236	193	238	0.019	33.9
tr|Q55372|Q55372_SYNY3	WP_062431746.1	24.306	144	75	6	216	349	540	659	0.047	32.7
tr|Q55372|Q55372_SYNY3	WP_012305681.1	26.923	78	24	1	159	236	172	216	0.048	32.7
tr|Q55372|Q55372_SYNY3	WP_012307148.1	25.000	100	53	3	216	314	133	211	0.061	32.3
tr|Q55372|Q55372_SYNY3	WP_065710337.1	23.077	78	27	1	159	236	181	225	0.093	31.6
tr|Q55372|Q55372_SYNY3	WP_138073562.1	48.387	31	16	0	207	237	22	52	0.094	31.6
tr|Q55372|Q55372_SYNY3	WP_138073220.1	30.667	75	38	3	288	350	110	182	0.12	31.2
tr|Q55372|Q55372_SYNY3	WP_030007864.1	25.676	74	52	1	186	256	3	76	0.18	30.4
tr|Q55372|Q55372_SYNY3	WP_062436324.1	41.935	31	18	0	212	242	32	62	0.30	29.6
tr|Q55372|Q55372_SYNY3	WP_062433174.1	28.358	67	46	1	78	144	381	445	0.33	30.0
tr|Q55372|Q55372_SYNY3	WP_138072468.1	50.000	26	13	0	205	230	20	45	0.40	29.3
tr|Q55372|Q55372_SYNY3	WP_138072716.1	26.797	153	76	7	114	240	271	413	0.51	29.3
tr|Q55372|Q55372_SYNY3	WP_065711842.1	56.000	25	11	0	218	242	33	57	0.72	28.5
tr|Q55372|Q55372_SYNY3	WP_138073659.1	23.308	133	97	1	194	321	7	139	0.72	28.5
tr|Q55372|Q55372_SYNY3	WP_012306671.1	56.522	23	10	0	212	234	2	24	0.84	28.1
sll0616	Q55709	preprotein translocase SecA subunit	secA	secA	Sec Pathway	Cellular Processes	Soluble proteins		106.9	0
BLAST Output	PCC 11901 Accession	Percentage Identity	Alignment Length	Mismatches	Gap Open	Synechocystis sp. PCC 6803 Start	Synechocystis sp. PCC 6803 End	PCC 11901 Start	PCC 11901 End	E-value	Bit Score
sp|Q55709|SECA_SYNY3	WP_138073154.1	78.726	926	188	3	1	920	1	923	0.0	1478
sp|Q55709|SECA_SYNY3	WP_138071400.1	35.088	57	35	1	50	104	378	434	0.74	29.6
sp|Q55709|SECA_SYNY3	WP_012307853.1	28.986	69	47	1	409	477	167	233	0.89	29.3
sll1814	P77964	preprotein translocase SecY subunit	secY	secY	Sec Pathway	Cellular Processes	TM		48	10
BLAST Output	PCC 11901 Accession	Percentage Identity	Alignment Length	Mismatches	Gap Open	Synechocystis sp. PCC 6803 Start	Synechocystis sp. PCC 6803 End	PCC 11901 Start	PCC 11901 End	E-value	Bit Score
sp|P77964|SECY_SYNY3	WP_012306672.1	73.923	441	113	1	1	441	1	439	0.0	637
ssl3335	P38382	preprotein translocase SecE subunit	secE	secE, ssl3335	Sec Pathway	Cellular Processes	TM		9.1	1
BLAST Output	PCC 11901 Accession	Percentage Identity	Alignment Length	Mismatches	Gap Open	Synechocystis sp. PCC 6803 Start	Synechocystis sp. PCC 6803 End	PCC 11901 Start	PCC 11901 End	E-value	Bit Score
sp|P38382|SECE_SYNY3	WP_012306658.1	53.333	75	31	1	4	78	5	75	1.68e-20	74.3
slr0774	Q55610	protein-export membrane protein SecD	secD	secD	Sec Pathway	Cellular Processes	Unknown		48.1	6
BLAST Output	PCC 11901 Accession	Percentage Identity	Alignment Length	Mismatches	Gap Open	Synechocystis sp. PCC 6803 Start	Synechocystis sp. PCC 6803 End	PCC 11901 Start	PCC 11901 End	E-value	Bit Score
sp|Q55610|SECD_SYNY3	WP_138072659.1	66.022	465	155	3	1	464	1	463	0.0	602
sp|Q55610|SECD_SYNY3	WP_099237936.1	27.326	172	118	3	280	444	128	299	7.27e-11	59.7
sp|Q55610|SECD_SYNY3	WP_099237936.1	29.358	109	65	4	2	103	10	113	0.004	35.4
sp|Q55610|SECD_SYNY3	WP_138072582.1	30.872	149	87	9	307	448	892	1031	0.46	29.6
sp|Q55610|SECD_SYNY3	WP_138072078.1	30.909	55	37	1	337	391	132	185	0.76	28.1
slr0775	Q55611	protein-export membrane protein SecF	secF	secF	Sec Pathway	Cellular Processes	Unknown		34.6	6
BLAST Output	PCC 11901 Accession	Percentage Identity	Alignment Length	Mismatches	Gap Open	Synechocystis sp. PCC 6803 Start	Synechocystis sp. PCC 6803 End	PCC 11901 Start	PCC 11901 End	E-value	Bit Score
sp|Q55611|SECF_SYNY3	WP_099237936.1	57.006	314	132	2	2	312	4	317	1.52e-115	333
sp|Q55611|SECF_SYNY3	WP_138072659.1	23.636	165	119	3	124	288	279	436	1.95e-09	54.7
sp|Q55611|SECF_SYNY3	WP_138072659.1	23.810	105	72	2	8	108	1	101	0.19	29.6
sp|Q55611|SECF_SYNY3	WP_138072582.1	20.482	166	116	6	164	314	891	1055	0.042	32.0
ssr3307	P74508	preprotein translocase SecG subunit	secG, ycf47	ycf47, secG, ssr3307	Sec Pathway	Cellular Processes
BLAST Output	PCC 11901 Accession	Percentage Identity	Alignment Length	Mismatches	Gap Open	Synechocystis sp. PCC 6803 Start	Synechocystis sp. PCC 6803 End	PCC 11901 Start	PCC 11901 End	E-value	Bit Score
tr|P74508|P74508_SYNY3	WP_062435414.1	67.123	73	24	0	3	75	2	74	9.31e-20	72.4
slr1471	P74155	hypothetical protein		alb3, oxa1, synyidC	SRP Pathway	Cellular Processes	TM		42.6	3
BLAST Output	PCC 11901 Accession	Percentage Identity	Alignment Length	Mismatches	Gap Open	Synechocystis sp. PCC 6803 Start	Synechocystis sp. PCC 6803 End	PCC 11901 Start	PCC 11901 End	E-value	Bit Score
sp|P74155|YIDC_SYNY3	WP_012306618.1	63.402	388	137	2	1	384	1	387	0.0	520
slr1531	P74214	signal recognition particle protein	ffh	ffh	SRP Pathway	Cellular Processes	Soluble proteins		52.1	0
BLAST Output	PCC 11901 Accession	Percentage Identity	Alignment Length	Mismatches	Gap Open	Synechocystis sp. PCC 6803 Start	Synechocystis sp. PCC 6803 End	PCC 11901 Start	PCC 11901 End	E-value	Bit Score
sp|P74214|SRP54_SYNY3	WP_138073352.1	81.368	424	78	1	1	423	1	424	0.0	709
sp|P74214|SRP54_SYNY3	WP_138073733.1	34.328	268	159	6	29	284	263	525	1.67e-32	126
sp|P74214|SRP54_SYNY3	WP_138071079.1	29.091	110	54	4	110	219	11	96	0.040	32.0
sp|P74214|SRP54_SYNY3	WP_138070987.1	29.091	110	54	4	110	219	11	96	0.040	32.0
slr2102	P73930	cell division protein FtsY	ftsY	ftsY	SRP Pathway	Cellular Processes	Soluble proteins		53.8	0
BLAST Output	PCC 11901 Accession	Percentage Identity	Alignment Length	Mismatches	Gap Open	Synechocystis sp. PCC 6803 Start	Synechocystis sp. PCC 6803 End	PCC 11901 Start	PCC 11901 End	E-value	Bit Score
sp|P73930|FTSY_SYNY3	WP_138073733.1	59.965	567	134	10	1	504	1	537	0.0	592
sp|P73930|FTSY_SYNY3	WP_138073352.1	32.993	294	176	6	219	503	14	295	1.99e-39	145
sp|P73930|FTSY_SYNY3	WP_138072188.1	40.816	49	22	1	296	337	15	63	0.058	32.0
sp|P73930|FTSY_SYNY3	WP_030007136.1	42.222	45	25	1	297	341	2	45	0.067	31.2
sp|P73930|FTSY_SYNY3	WP_030006711.1	36.364	44	19	1	279	322	19	53	0.15	30.4
sp|P73930|FTSY_SYNY3	WP_030005941.1	51.852	27	13	0	303	329	32	58	0.79	28.5
sll1545	P74665	glutathione S-transferase		gst1	Small redox enzymes	Cellular Processes	PM		29.7	0
BLAST Output	PCC 11901 Accession	Percentage Identity	Alignment Length	Mismatches	Gap Open	Synechocystis sp. PCC 6803 Start	Synechocystis sp. PCC 6803 End	PCC 11901 Start	PCC 11901 End	E-value	Bit Score
tr|P74665|P74665_SYNY3	WP_138072070.1	66.052	271	87	1	1	271	1	266	3.55e-136	382
tr|P74665|P74665_SYNY3	WP_138071838.1	34.568	81	50	1	16	93	15	95	0.002	34.7
tr|P74665|P74665_SYNY3	WP_062436943.1	22.857	105	65	3	21	125	33	121	0.37	27.7
tr|P74665|P74665_SYNY3	WP_065715911.1	25.806	62	46	0	130	191	76	137	0.48	28.1
tr|P74665|P74665_SYNY3	WP_138073743.1	30.769	78	47	3	98	175	173	243	0.63	27.7
tr|P74665|P74665_SYNY3	WP_138071790.1	27.848	79	46	2	117	192	137	207	0.67	27.7
sll0067	Q55139	glutathione S-transferase		gst, parB	Small redox enzymes	Cellular Processes	Soluble proteins		20.4	0
BLAST Output	PCC 11901 Accession	Percentage Identity	Alignment Length	Mismatches	Gap Open	Synechocystis sp. PCC 6803 Start	Synechocystis sp. PCC 6803 End	PCC 11901 Start	PCC 11901 End	E-value	Bit Score
tr|Q55139|Q55139_SYNY3	WP_138071838.1	52.432	185	87	1	1	184	1	185	1.21e-63	191
tr|Q55139|Q55139_SYNY3	WP_138073477.1	42.857	42	22	2	19	60	176	215	0.26	28.1
tr|Q55139|Q55139_SYNY3	WP_138071788.1	31.579	57	39	0	18	74	63	119	0.40	27.7
tr|Q55139|Q55139_SYNY3	WP_138072818.1	35.556	45	24	3	119	161	106	147	0.93	26.2
sll0554	Q55389	ferredoxin-thioredoxin reductase, catalytic chain	ftrC	ftrC	Small redox enzymes	Cellular Processes	Soluble proteins		13.4	0
BLAST Output	PCC 11901 Accession	Percentage Identity	Alignment Length	Mismatches	Gap Open	Synechocystis sp. PCC 6803 Start	Synechocystis sp. PCC 6803 End	PCC 11901 Start	PCC 11901 End	E-value	Bit Score
sp|Q55389|FTRC_SYNY3	WP_012307462.1	71.795	117	33	0	1	117	1	117	3.31e-64	187
sp|Q55389|FTRC_SYNY3	WP_138071410.1	36.842	19	12	0	57	75	5	23	0.65	25.8
slr0600	P74746	NADP-thioredoxin reductase		NTR, trxR	Small redox enzymes	Cellular Processes	Soluble proteins		36	0
BLAST Output	PCC 11901 Accession	Percentage Identity	Alignment Length	Mismatches	Gap Open	Synechocystis sp. PCC 6803 Start	Synechocystis sp. PCC 6803 End	PCC 11901 Start	PCC 11901 End	E-value	Bit Score
tr|P74746|P74746_SYNY3	WP_138072806.1	85.185	324	48	0	1	324	1	324	0.0	586
tr|P74746|P74746_SYNY3	WP_138073436.1	25.402	311	152	18	17	262	6	301	4.81e-05	41.2
tr|P74746|P74746_SYNY3	WP_138073502.1	54.839	31	14	0	16	46	12	42	0.002	35.8
tr|P74746|P74746_SYNY3	WP_138072667.1	22.652	181	110	6	12	172	1	171	0.014	33.5
tr|P74746|P74746_SYNY3	WP_138072865.1	33.333	42	28	0	19	60	100	141	0.13	30.4
tr|P74746|P74746_SYNY3	WP_138073620.1	39.024	41	21	2	16	53	167	206	0.15	30.4
tr|P74746|P74746_SYNY3	WP_138073883.1	39.583	48	21	2	286	325	539	586	0.48	28.9
tr|P74746|P74746_SYNY3	WP_138073353.1	46.429	28	15	0	20	47	8	35	0.51	28.5
tr|P74746|P74746_SYNY3	WP_138073175.1	34.211	38	25	0	263	300	279	316	0.56	28.5
slr0623	P52231	thioredoxin	trxA	trxA, trxA1, trxM	Small redox enzymes	Cellular Processes	Soluble proteins		11.7	0
BLAST Output	PCC 11901 Accession	Percentage Identity	Alignment Length	Mismatches	Gap Open	Synechocystis sp. PCC 6803 Start	Synechocystis sp. PCC 6803 End	PCC 11901 Start	PCC 11901 End	E-value	Bit Score
sp|P52231|THIO_SYNY3	WP_012307227.1	72.897	107	29	0	1	107	1	107	4.37e-59	173
sp|P52231|THIO_SYNY3	WP_012305927.1	39.216	102	62	0	6	107	7	108	8.32e-25	87.0
sp|P52231|THIO_SYNY3	WP_012306818.1	34.653	101	66	0	7	107	5	105	1.57e-24	86.7
sp|P52231|THIO_SYNY3	WP_012307964.1	37.755	98	61	0	10	107	8	105	4.34e-24	85.1
sp|P52231|THIO_SYNY3	WP_138073144.1	28.421	95	65	2	16	107	53	147	3.18e-10	51.2
sp|P52231|THIO_SYNY3	WP_168191159.1	25.490	51	38	0	14	64	61	111	0.012	30.4
sp|P52231|THIO_SYNY3	WP_030006427.1	34.694	49	31	1	37	85	372	419	0.23	26.9
sp|P52231|THIO_SYNY3	WP_062433759.1	33.333	33	22	0	34	66	187	219	0.53	25.8
slr1269	P74181	gamma-glutamyltranspeptidase	ggt	ggt	Small redox enzymes	Cellular Processes	Soluble proteins		56	0
BLAST Output	PCC 11901 Accession	Percentage Identity	Alignment Length	Mismatches	Gap Open	Synechocystis sp. PCC 6803 Start	Synechocystis sp. PCC 6803 End	PCC 11901 Start	PCC 11901 End	E-value	Bit Score
sp|P74181|GGT_SYNY3	WP_138073838.1	30.636	519	339	8	5	516	2	506	3.56e-55	189
sp|P74181|GGT_SYNY3	WP_138073196.1	44.186	43	22	1	104	146	378	418	0.41	29.6
sp|P74181|GGT_SYNY3	WP_138071486.1	29.114	79	38	4	261	326	27	100	0.90	28.5
slr1846	P73056	hypothetical protein YCF64	ycf64	ycf64, grxC, grx3p, slr1846	Small redox enzymes	Cellular Processes	Soluble proteins		11.9	0
BLAST Output	PCC 11901 Accession	Percentage Identity	Alignment Length	Mismatches	Gap Open	Synechocystis sp. PCC 6803 Start	Synechocystis sp. PCC 6803 End	PCC 11901 Start	PCC 11901 End	E-value	Bit Score
sp|P73056|YC64L_SYNY3	WP_012306176.1	75.701	107	26	0	1	107	3	109	4.24e-61	179
sp|P73056|YC64L_SYNY3	WP_065713004.1	26.389	72	52	1	31	101	13	84	5.77e-07	40.8
sp|P73056|YC64L_SYNY3	WP_030006673.1	27.397	73	52	1	31	102	28	100	1.29e-05	37.7
[truncated: 7,262 more rows]

## Sheet: Key
Amino acid biosynthesis
Biosynthesis of cofactors, prosthetic groups, and carriers
Cell Envelope
Cellular Processes
Central Intermediary Metabolism
DNA replication, restriction, modification, recombination, and repair
Energy Metabolism
Fatty acid, phospholipid and sterol metabolism
Other Categories
Photosynthesis & Respiration
Purines, pyrimidines, nucleosides, and nucleotides
Random proteins (Hypothetical)
Regulatory Functions
Transcription / Translation
Transport & Binding Proteins
Unknown Proteins
